# Supplementary material
Source: PubMed Central journal article supplement (PMC2677232)
Supplement: rspb20081318s03.pdf [file rspb20081318s03.pdf]

## APPENDICES

**Appendix 1 – origin of carnivore range maps**

**Appendix 2 – sensitivity analysis with three distance categories**

**Appendix 3 – General additive model maps of the spatial components of size for all species**

**Appendix 4 – A. models with distance to range edge as a continuous linear predictor**

**B. models with distance to range edge as a continuous linear and quadratic predictor**

**C. comparison of models with and without quadratic terms**

**D. models with distance to range edge as a categorical predictor**

**E. models for specimens closer to an inland edge than to a coastal edge, with distance to range edge as a continuous predictor**

**Appendix 5 – species level data**

### Appendix 1– origin of carnivore range maps

| <b>Species</b>                    | <b>Range map from</b>                                                                           |
|-----------------------------------|-------------------------------------------------------------------------------------------------|
| <i>Alopex lagopus</i>             | Sechrest 2003, Grenyer et al. 2006*                                                             |
| <i>Canis aureus</i>               | Sechrest 2003, Grenyer et al. 2006, Van Valkenburgh and Wayne 1994*                             |
| <i>Canis latrans</i>              | Hall 1981*                                                                                      |
| <i>Canis lupus</i>                | Hall 1981                                                                                       |
| <i>Gulo gulo</i>                  | Hall 1981                                                                                       |
| <i>Herpestes edwardsii</i>        | Harrison and Bates 1991*                                                                        |
| <i>Lontra canadensis</i>          | Hall 1981                                                                                       |
| <i>Lutra lutra</i>                | Macdonald et al. 2002                                                                           |
| <i>Lynx canadensis</i>            | Hall 1981                                                                                       |
| <i>Martes americana</i>           | Hall 1981*                                                                                      |
| <i>Martes foina</i>               | Corbet and Hill 1992, Mitchell-Jones et al. 1993, Sechrest 2003, Grenyer et al. 2006, IUCN 2007 |
| <i>Martes martes</i>              | Sechrest 2003, Grenyer et al. 2006*                                                             |
| <i>Meles meles</i>                | Bevanger and Lindström 1995, Mendelsohn and Yom-Tov 1999, Sechrest 2003, Grenyer et al. 2006    |
| <i>Mustela erminea</i> (N)        | Sechrest 2003, Grenyer et al. 2006*                                                             |
| <i>Mustela erminea</i> (P)        | Mitchell-Jones et al. 1993, Sechrest 2003, Grenyer et al. 2006                                  |
| <i>Mustela frenata</i>            | Hall 1951, Sheffield and Thomas 1997                                                            |
| <i>Mustela nivalis</i> (N)        | Hall 1981                                                                                       |
| <i>Mustela nivalis</i> (P)        | Sheffield and King 1994*                                                                        |
| <i>Mustela putorius</i>           | Macdonald et al. 2002                                                                           |
| <i>Mustela vison</i>              | Hall 1981                                                                                       |
| <i>Paradoxurus hermaphroditus</i> | Sechrest 2003, Grenyer et al. 2006                                                              |

|                                 |                                                              |
|---------------------------------|--------------------------------------------------------------|
| <i>Procyon lotor</i>            | Hall 1981*                                                   |
| <i>Spilogale gracilis</i>       | Verts et al. 2001*                                           |
| <i>Urocyon cinereoargenteus</i> | Hall 1981                                                    |
| <i>Ursus arctos</i>             | Hall 1981, Servheen et al. 1998                              |
| <i>Viverricula indica</i>       | Helin et al. 1999, Sechrest 2003, Grenyer et al. 2006        |
| <i>Vulpes vulpes</i> (N)        | Hall 1981                                                    |
| <i>Vulpes vulpes</i> (P)        | Harrison and Bates 1991, Sechrest 2003, Grenyer et al. 2006* |

(N) = Nearctic; (P) = Palaeartic.

**Literature cited:**

- Bevanger, K. and Lindström, E. R. 1995. Distributional history of the European badger *Meles meles* in Scandinavia during the 20th century. *Annales Zoologica Fennici* 32: 5-9.
- Corbet, G. B. and Hill, J. E. 1992. The mammals of the IndoMalayan region. Oxford University Press. Oxford.
- Grenyer, R., Orme, C. D. L., Jackson, S. F., Thomas, G. H., Davies, R. G., Davies, T. J., Jones, K. E., Olson, V. A., Ridgely, R. S., Rasmussen, P. C., Ding, T-S., Bennett, P. M., Blackburn, T. M., Gaston, K. J., Gittleman, J. L. and Owens, I. P. F. 2006 Global distribution and conservation of rare and threatened vertebrates. *Nature* 444, 93-96.
- Hall, R. E. 1951. American Weasels. University of Kansas Publications Museum of Natural History 4: 1-466.
- Hall, R. E. 1981. The mammals of North America. 2nd edition. John Wiley & Sons. New York.
- Harrison, D. L. L. and Bates, P. J. J. 1991. The mammals of Arabia. 2nd ed. Harrison Zoological Museum Publications, Sevenoaks.
- Helin, S., Ohtaishi, N. and Houji, L. 1999. The mammalian of China. China Forestry Publishing House, Beijing.
- IUCN (2007) European mammal assessment. Available at: <http://ec.europa.eu/environment/nature/conservation/species/ema/> (accessed 01 September 2008).
- Macdonald, D. W., Sidorovich, V. E., Maran, T. and Krunk. H. 2002. European mink, *Mustela lutreola*: analyses for conservation. Wildlife Conservation Research Unit. Oxford.
- Mendelssohn, H. and Yom-Tov, Y. 1999. Mammalia of Israel. The Israel academy of sciences and humanities, Jerusalem.
- Mitchell-Jones, A. J., Amori, G., Bogdanowicz, B., Krystufek, B., Reijnders, P. H. J., Spitzenberger, F., Stubbe, M., Thirssen, J. B. M., Vohralik, V. and Zima, J. 1999. The atlas of European mammals. Academic Press. London.
- Sechrest, W. W. 2003. Global diversity, endemism, and conservation of mammals. PhD Thesis, University of Virginia.
- Servheen, C., Herrero, S. and Peyton, B. 1998. Bears status survey and conservation. Action plan. IUCN/SSC Bear Specialist Group. IUCN, Gland, Switzerland.
- Sheffield, S. R. and King, C. M. 1994. *Mustela nivalis*. *Mammalian Species* 454: 1-10.
- Sheffield, S. R. and Thomas, H. H. 1997. *Mustela frenata*. *Mammalian Species* 570: 1-9.

Van Valkenburgh, B. and Wayne, R. K. 1994. Shape divergence associated with size convergence in sympatric East African jackals. *Ecology* 75: 1567-1581.

Verts, B. J., Carraway, L. N., and Kinlaw, A. 2001. *Spilogale gracilis*. *Mammalian Species* 674: 1-10.

\*Range further modified by the authors to include specimens that fall outside published map

## Appendix 2 – sensitivity analysis with three distance categories

Slopes and probabilities of the relationship between condylo-basal length (CBL, in mm) and distance to range edge, controlling for latitude, longitude and sex.

Distances are in km, 5 km and 30 km units. Sample sizes as in Table 1.

(N) = Nearctic; (P) = Palearctic.

| Species                           | Slope of<br>CBL vs.<br>distance | Slope of<br>CBL vs.<br>distance | Slope of<br>CBL vs.<br>distance | p value        | p value               | p value             |
|-----------------------------------|---------------------------------|---------------------------------|---------------------------------|----------------|-----------------------|---------------------|
| units                             | mm / log<br>km                  | mm / log (5<br>km)              | mm / log<br>(30 km)             | mm / log<br>km | mm /<br>log (5<br>km) | mm / log<br>(30 km) |
| <i>Alopex lagopus</i>             | -0.015                          | -0.077                          | -0.541                          | 0.205          | 0.194                 | 0.146               |
| <i>Canis aureus</i>               | -0.006                          | -0.030                          | -0.177                          | 0.125          | 0.128                 | 0.133               |
| <i>Canis latrans</i>              | 0.000                           | 0.001                           | 0.011                           | 0.953          | 0.949                 | 0.917               |
| <i>Canis lupus</i>                | 0.018                           | 0.088                           | 0.522                           | 0.0001         | 0.0002                | 0.0002              |
| <i>Gulo gulo</i>                  | -0.005                          | -0.025                          | -0.154                          | 0.106          | 0.104                 | 0.096               |
| <i>Herpestes edwardsii</i>        | 0.002                           | 0.009                           | 0.054                           | 0.412          | 0.405                 | 0.394               |
| <i>Lontra canadensis</i>          | -0.009                          | -0.042                          | -0.231                          | 0.029          | 0.033                 | 0.051               |
| <i>Lutra lutra</i>                | -0.002                          | -0.011                          | -0.058                          | 0.484          | 0.477                 | 0.536               |
| <i>Lynx canadensis</i>            | 0.001                           | 0.005                           | 0.029                           | 0.657          | 0.660                 | 0.647               |
| <i>Martes americana</i>           | -0.007                          | -0.035                          | -0.215                          | 0.0002         | 0.0002                | 0.0002              |
| <i>Martes foina</i>               | 0.001                           | 0.004                           | 0.035                           | 0.560          | 0.564                 | 0.414               |
| <i>Martes martes</i>              | 0.003                           | 0.013                           | 0.078                           | 0.290          | 0.285                 | 0.282               |
| <i>Meles meles</i>                | 0.001                           | 0.007                           | 0.032                           | 0.565          | 0.567                 | 0.671               |
| <i>Mustela erminea</i> (N)        | 0.001                           | 0.003                           | 0.015                           | 0.250          | 0.245                 | 0.272               |
| <i>Mustela erminea</i> (P)        | 0.002                           | 0.009                           | 0.050                           | 0.121          | 0.129                 | 0.159               |
| <i>Mustela frenata</i>            | -0.004                          | -0.018                          | -0.106                          | <0.0001        | <0.0001               | <0.0001             |
| <i>Mustela nivalis</i> (N)        | -0.002                          | -0.011                          | -0.063                          | 0.006          | 0.006                 | 0.007               |
| <i>Mustela nivalis</i> (P)        | -0.008                          | -0.038                          | -0.220                          | <0.0001        | <0.0001               | <0.0001             |
| <i>Mustela putorius</i>           | 0.008                           | 0.042                           | 0.249                           | <0.0001        | <0.0001               | <0.0001             |
| <i>Mustela vison</i>              | 0.001                           | 0.005                           | 0.023                           | 0.462          | 0.454                 | 0.599               |
| <i>Paradoxurus hermaphroditus</i> | 0.000                           | 0.000                           | -0.017                          | 0.988          | 0.990                 | 0.938               |
| <i>Procyon lotor</i>              | 0.009                           | 0.049                           | 0.183                           | 0.179          | 0.170                 | 0.407               |
| <i>Spilogale gracilis</i>         | -0.033                          | -0.163                          | -1.021                          | 0.005          | 0.007                 | 0.012               |
| <i>Urocyon cinereoargenteus</i>   | -0.002                          | -0.010                          | -0.080                          | 0.606          | 0.592                 | 0.490               |
| <i>Ursus arctos</i>               | -0.040                          | -0.198                          | -1.170                          | 0.004          | 0.004                 | 0.006               |
| <i>Viverricula indica</i>         | -0.006                          | -0.030                          | -0.195                          | 0.028          | 0.028                 | 0.020               |
| <i>Vulpes vulpes</i> (N)          | -0.001                          | -0.004                          | -0.013                          | 0.781          | 0.786                 | 0.887               |
| <i>Vulpes vulpes</i> (P)          | 0.005                           | 0.027                           | 0.165                           | 0.072          | 0.069                 | 0.069               |



### Appendix 3 – General additive model maps of the spatial components of size for all species

Spatial components of GAMs of CBL (in mm) as a function of location.

- a. GAM statistics
- b. GAM maps
- c. Range maps and specimens locations

(N) = Nearctic; (P) = Palaeartic.

| Species                           | % Deviance explained by full model | Smooth term equivalent degrees of freedom | Approximate significance of smoothing | N    |
|-----------------------------------|------------------------------------|-------------------------------------------|---------------------------------------|------|
| <i>Alopex lagopus</i>             | 37.4                               | 10.7                                      | 0.0239                                | 153  |
| <i>Canis aureus</i>               | 78.5                               | 25.33                                     | <10E-5                                | 108  |
| <i>Canis latrans</i>              | 58.3                               | 12.37                                     | <10E-5                                | 176  |
| <i>Canis lupus</i>                | 46.2                               | 13.64                                     | <10E-5                                | 173  |
| <i>Gulo gulo</i>                  | 53.1                               | 4.394                                     | 0.0154                                | 128  |
| <i>Herpestes edwardsii</i>        | 60.5                               | 8.921                                     | 0.00106                               | 103  |
| <i>Lontra canadensis</i>          | 56.5                               | 17.17                                     | <10E-5                                | 153  |
| <i>Lutra lutra</i>                | 68.4                               | 20.753                                    | <10E-5                                | 105  |
| <i>Lynx canadensis</i> *          | 48.4                               | 2                                         | <10E-5                                | 197  |
| <i>Martes americana</i>           | 73.7                               | 23.21                                     | <10E-5                                | 307  |
| <i>Martes foina</i>               | 56.1                               | 19.23                                     | <10E-5                                | 264  |
| <i>Martes martes</i> *            | 42.5                               | 2                                         | 0.0227                                | 145  |
| <i>Meles meles</i>                | 67.8                               | 20.49                                     | <10E-5                                | 328  |
| <i>Mustela erminea</i> (N)        | 72.9                               | 27.2                                      | <10E-5                                | 1227 |
| <i>Mustela erminea</i> (P)        | 54.6                               | 21.29                                     | <10E-5                                | 437  |
| <i>Mustela frenata</i>            | 65.2                               | 25.32                                     | <10E-5                                | 714  |
| <i>Mustela nivalis</i> (N)        | 62.5                               | 15.73                                     | <10E-5                                | 149  |
| <i>Mustela nivalis</i> (P)        | 81.2                               | 26.91                                     | <10E-5                                | 823  |
| <i>Mustela putorius</i>           | 59.1                               | 15.46                                     | <10E-5                                | 467  |
| <i>Mustela vison</i>              | 70                                 | 24.43                                     | <10E-5                                | 404  |
| <i>Paradoxurus hermaphroditus</i> | 65.4                               | 17.41                                     | <10E-5                                | 109  |
| <i>Procyon lotor</i>              | 63.9                               | 22.07                                     | <10E-5                                | 131  |
| <i>Spilogale gracilis</i>         | 78.4                               | 9.99                                      | <10E-5                                | 102  |
| <i>Urocyon cinereoargenteus</i>   | 56.1                               | 11.77                                     | <10E-5                                | 174  |
| <i>Ursus arctos</i>               | 78.9                               | 11.41                                     | <10E-5                                | 151  |
| <i>Viverricula indica</i>         | 59.9                               | 14.85                                     | <10E-5                                | 108  |
| <i>Vulpes vulpes</i> (N)          | 68.1                               | 22.47                                     | <10E-5                                | 235  |
| <i>Vulpes vulpes</i> (P)          | 67.5                               | 22.84                                     | <10E-5                                | 300  |

\*Possible convergence failure

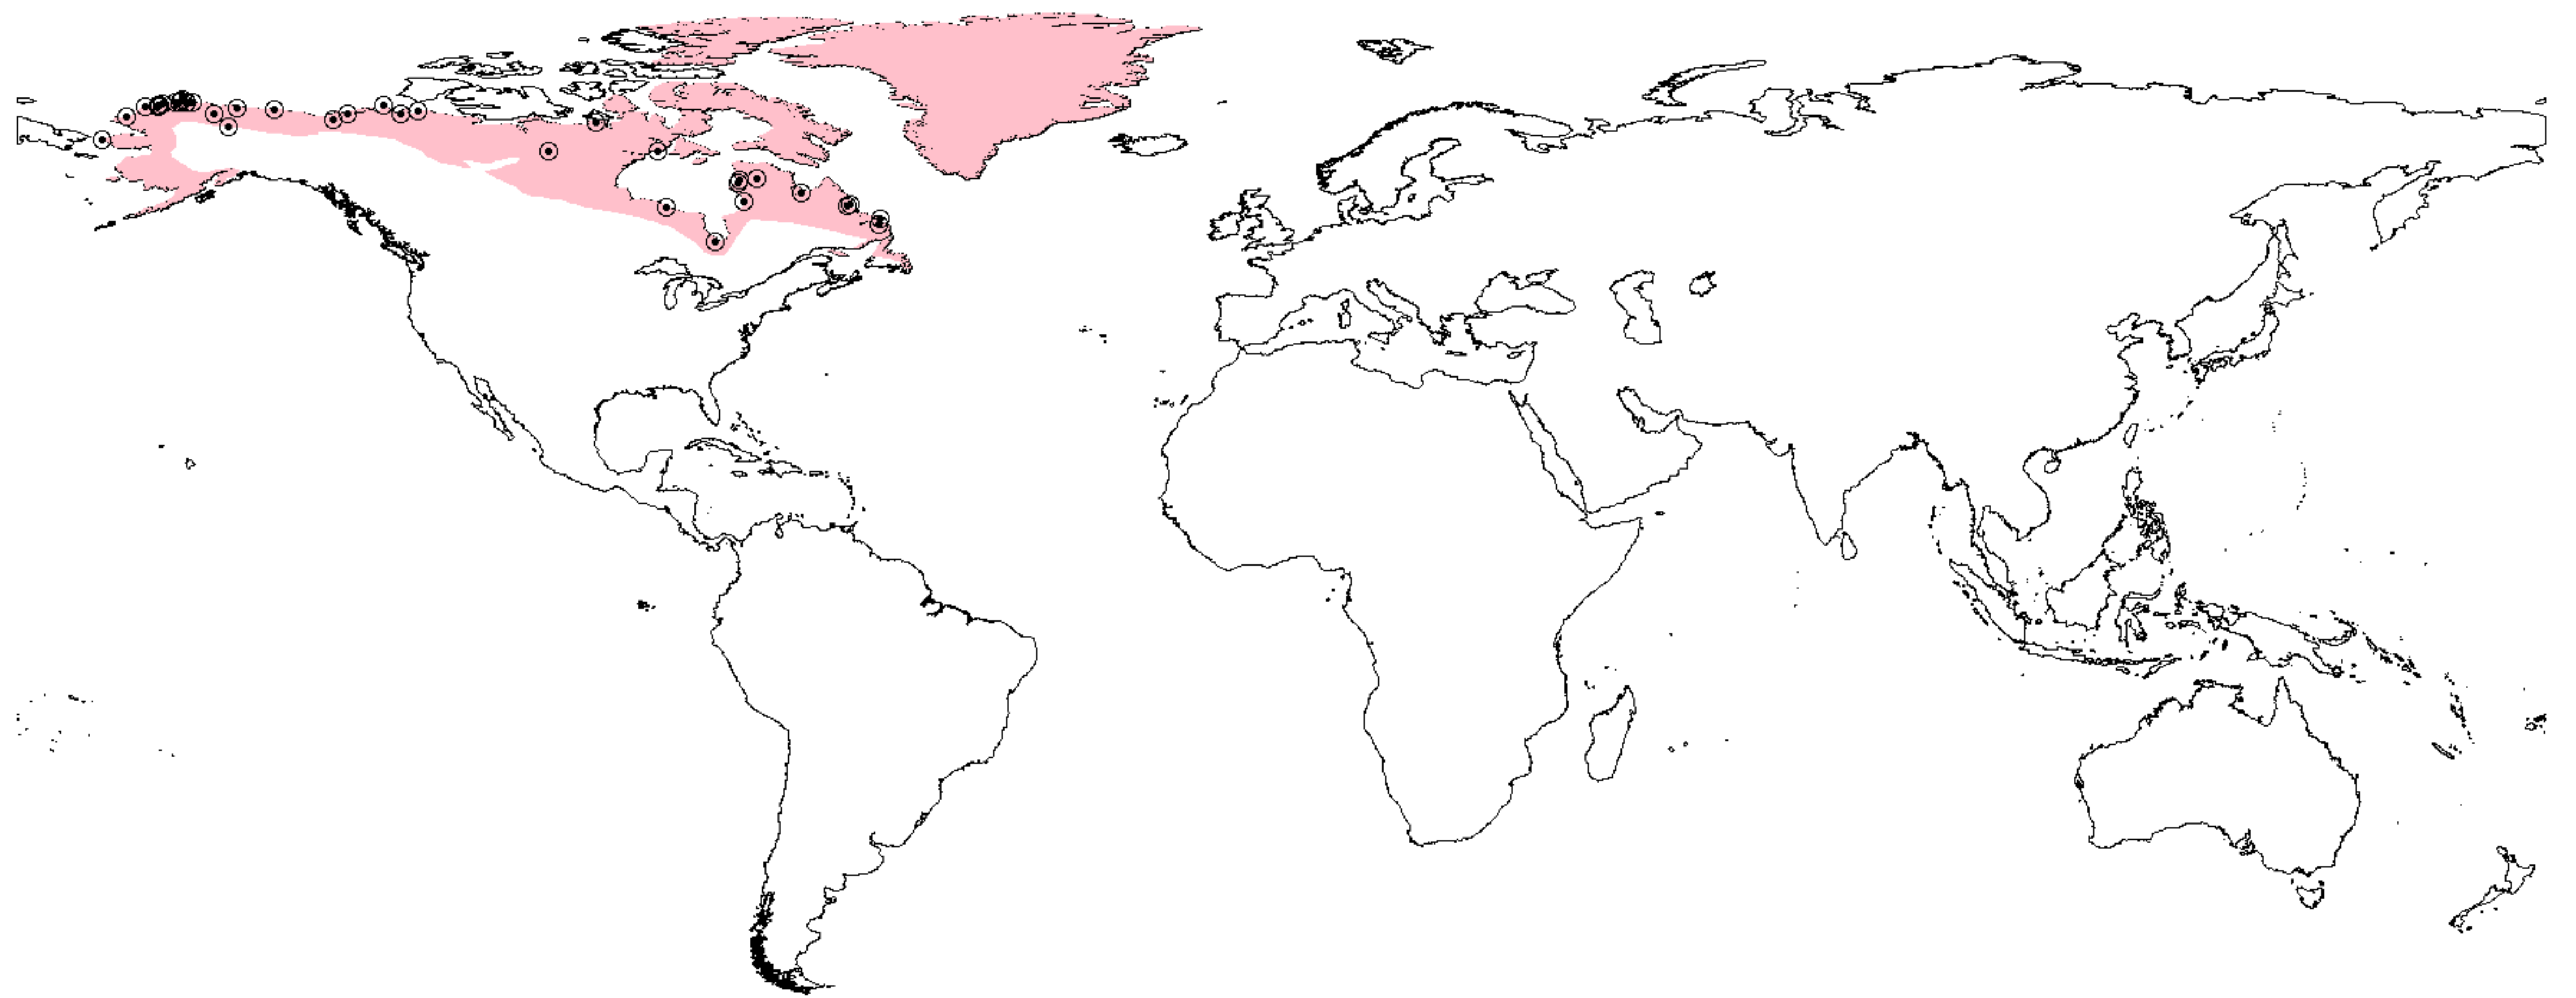

*Alopex lagopus*

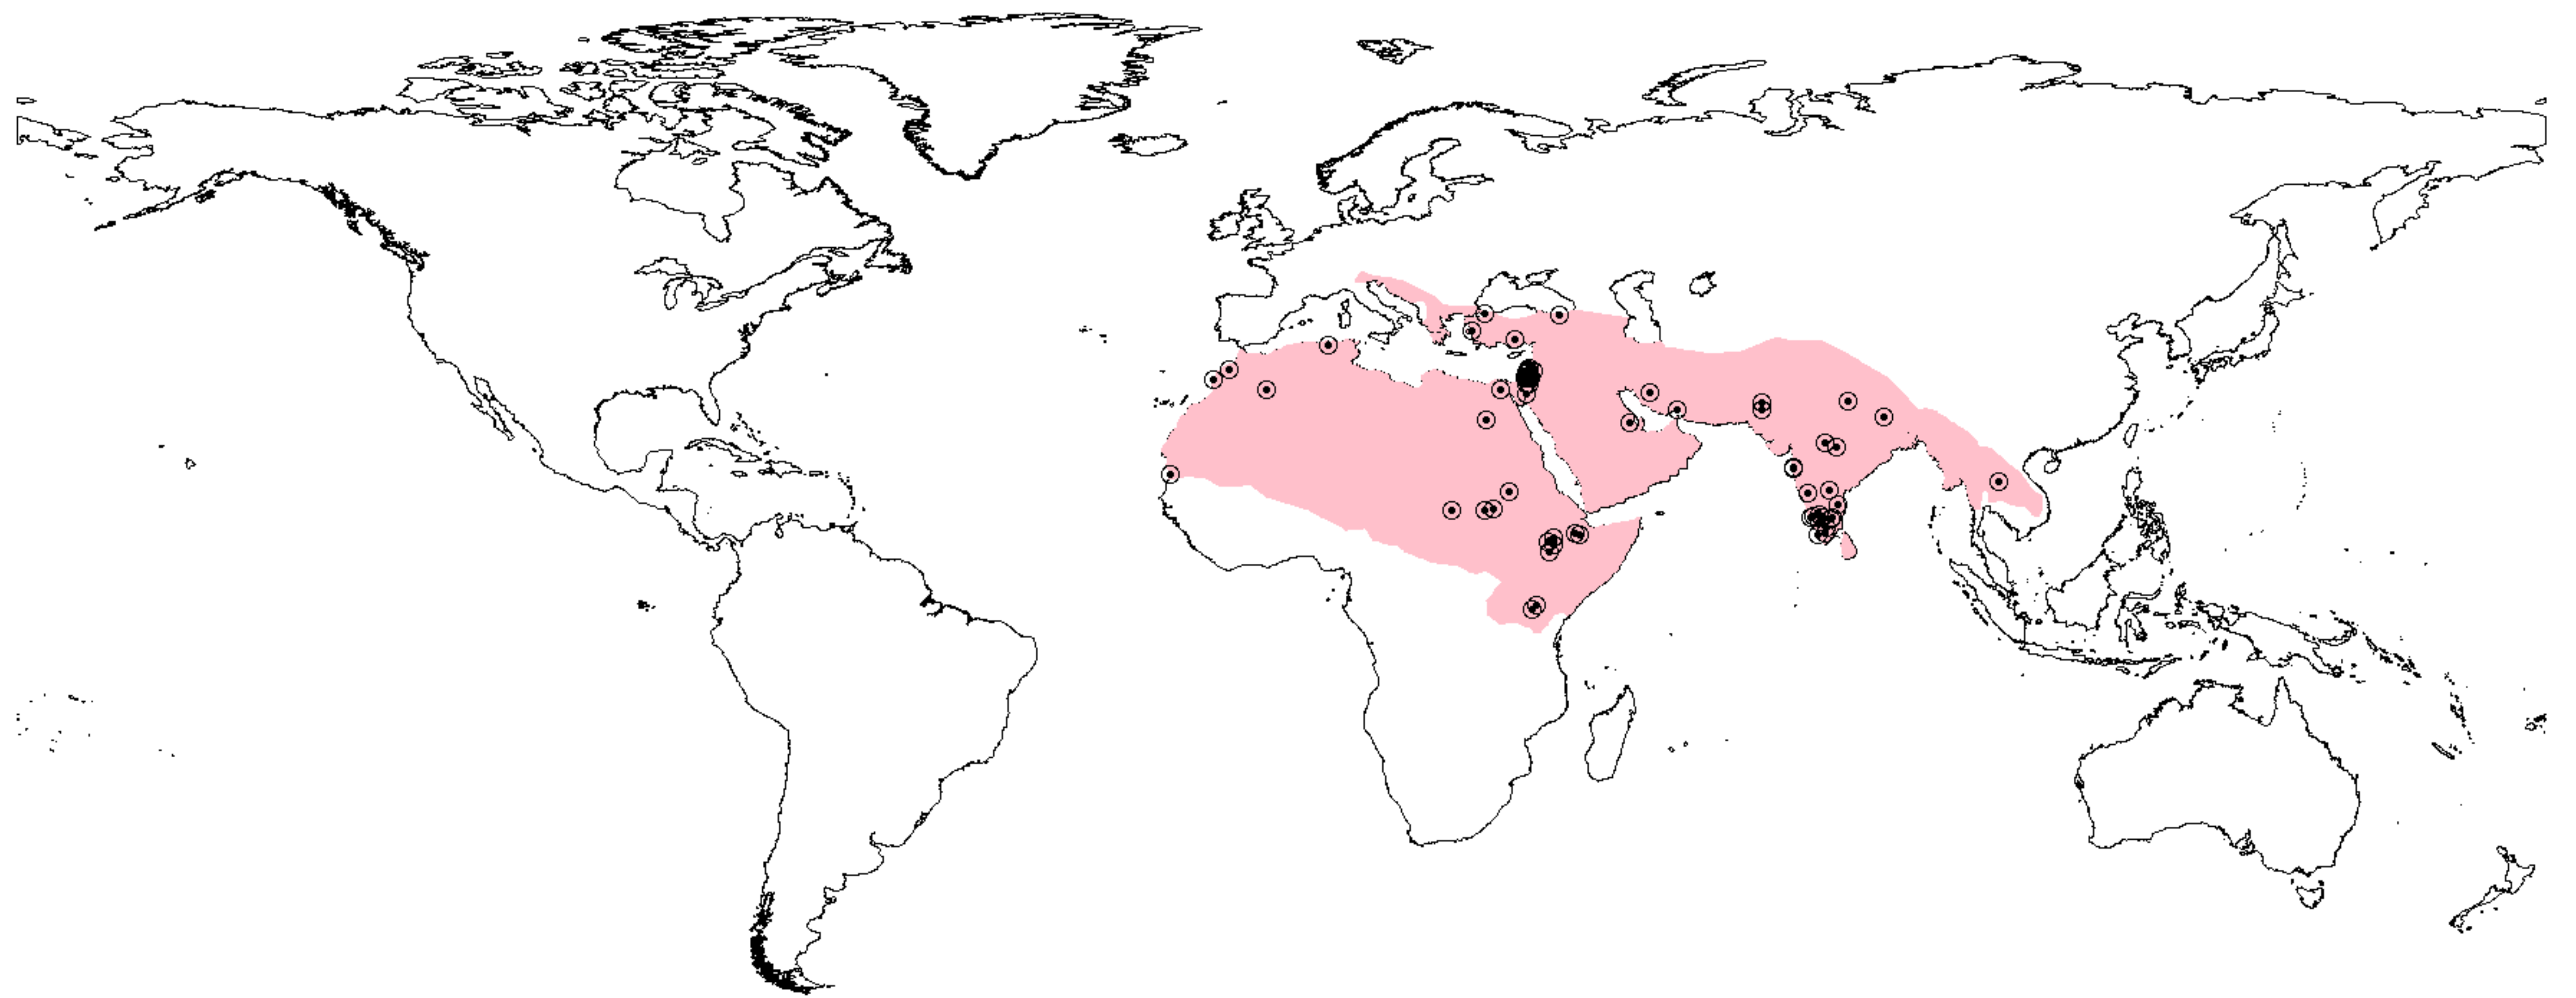

*Canis aureus*

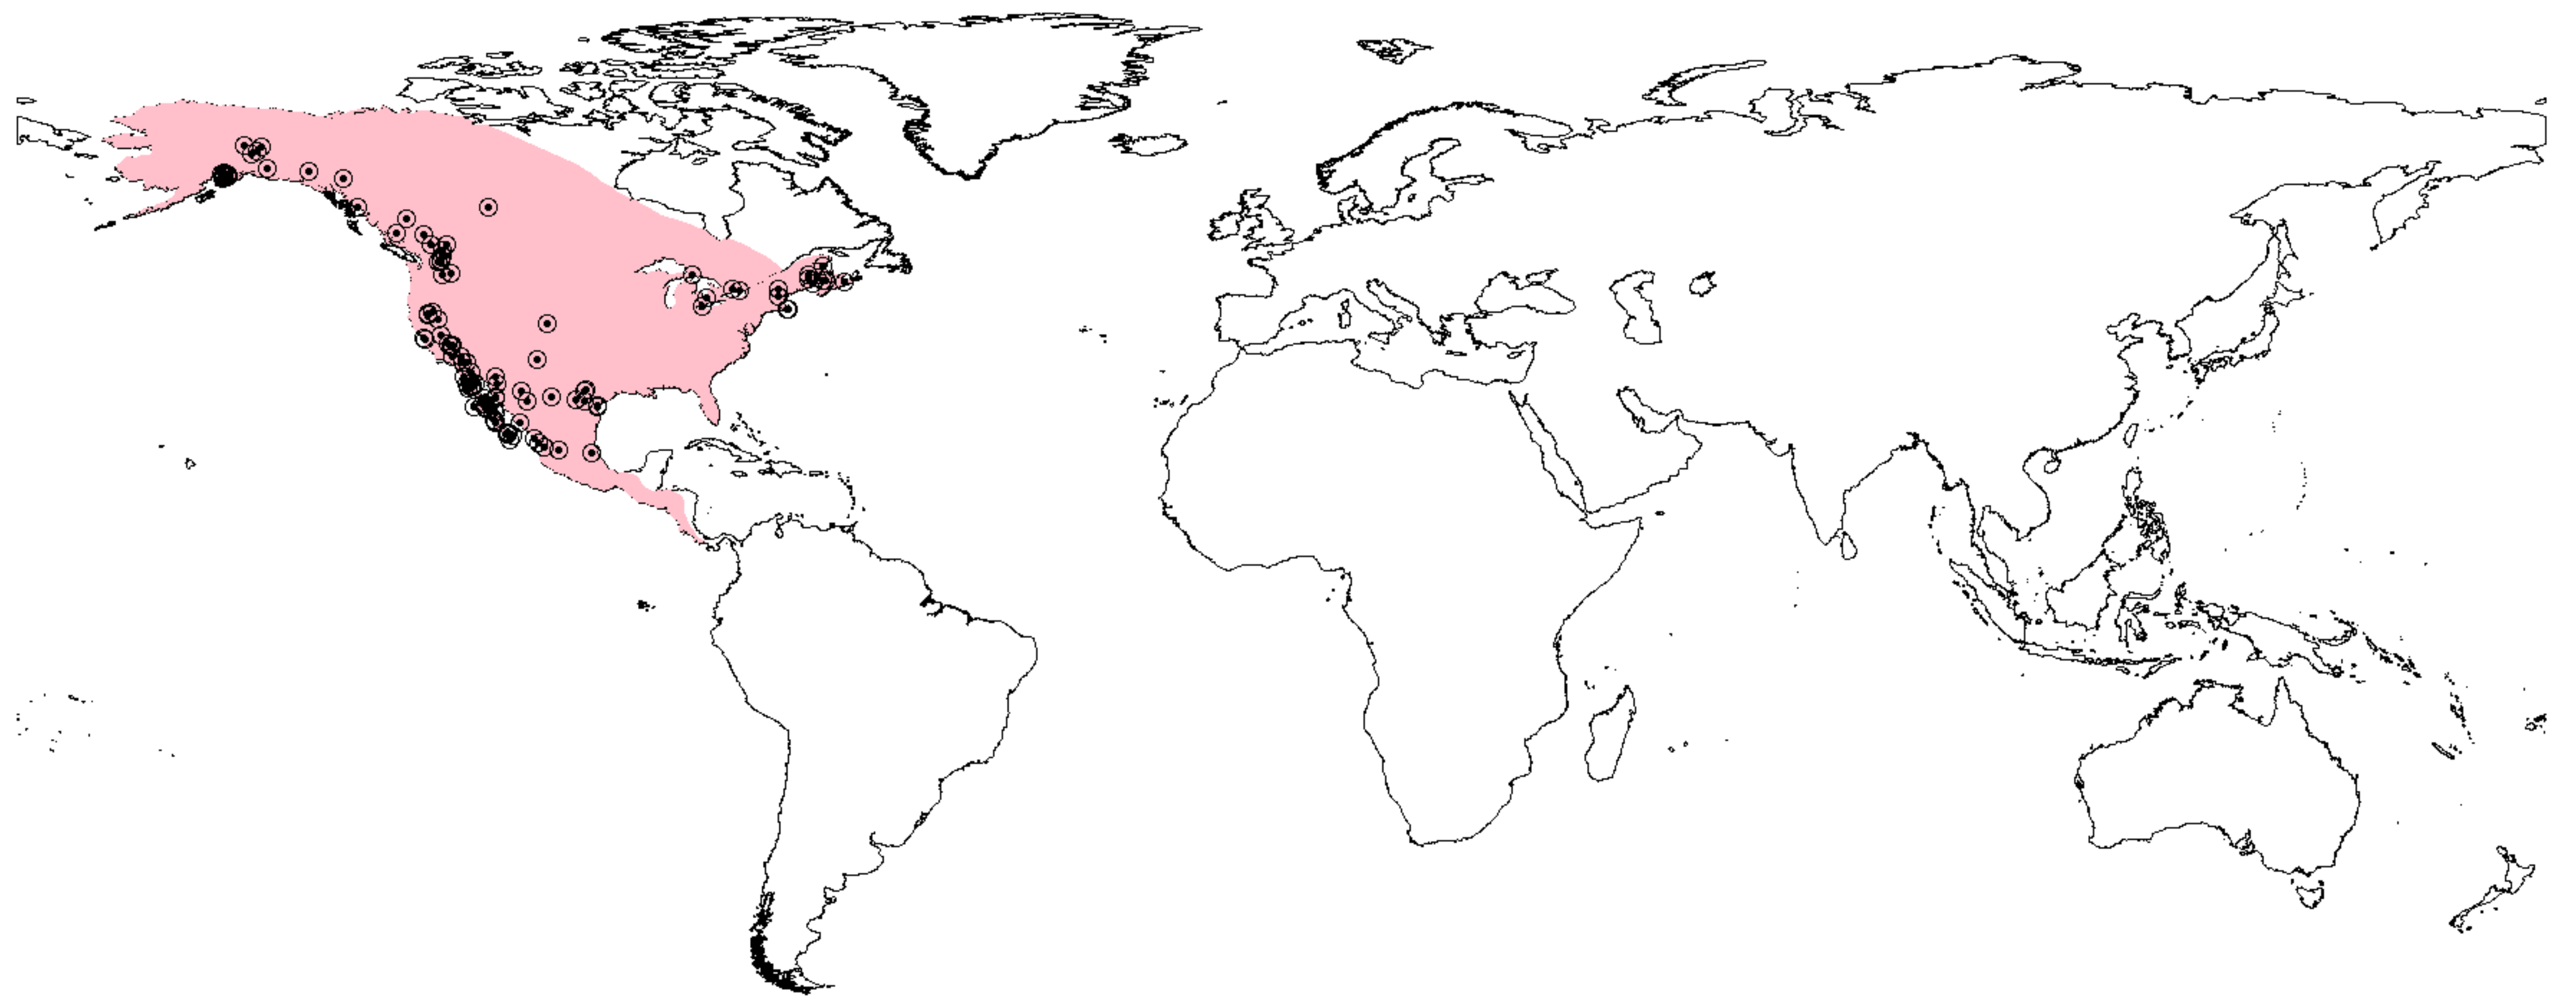

*Canis latrans*

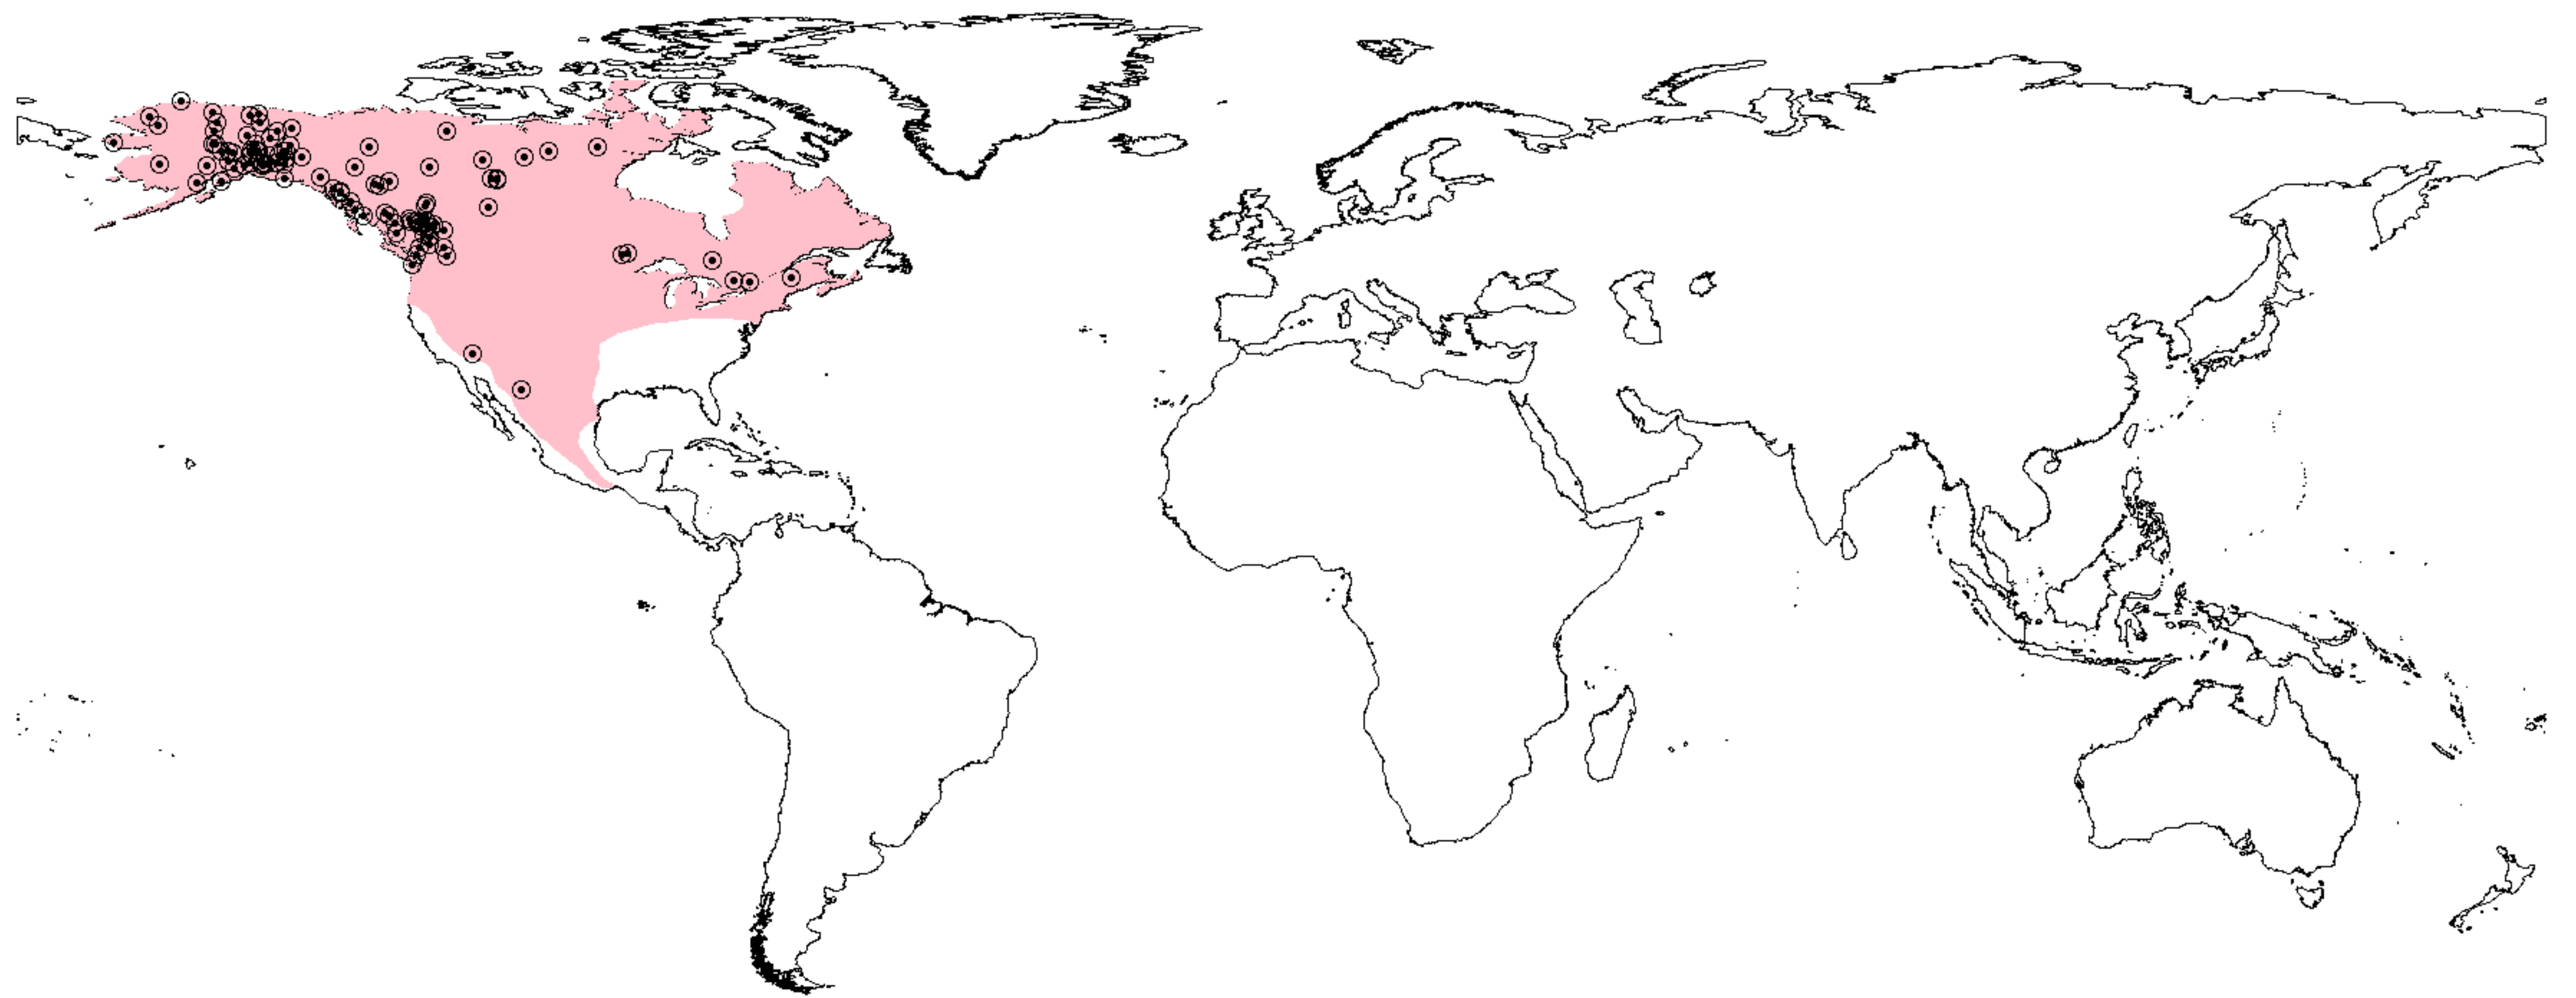

*Canis lupus*



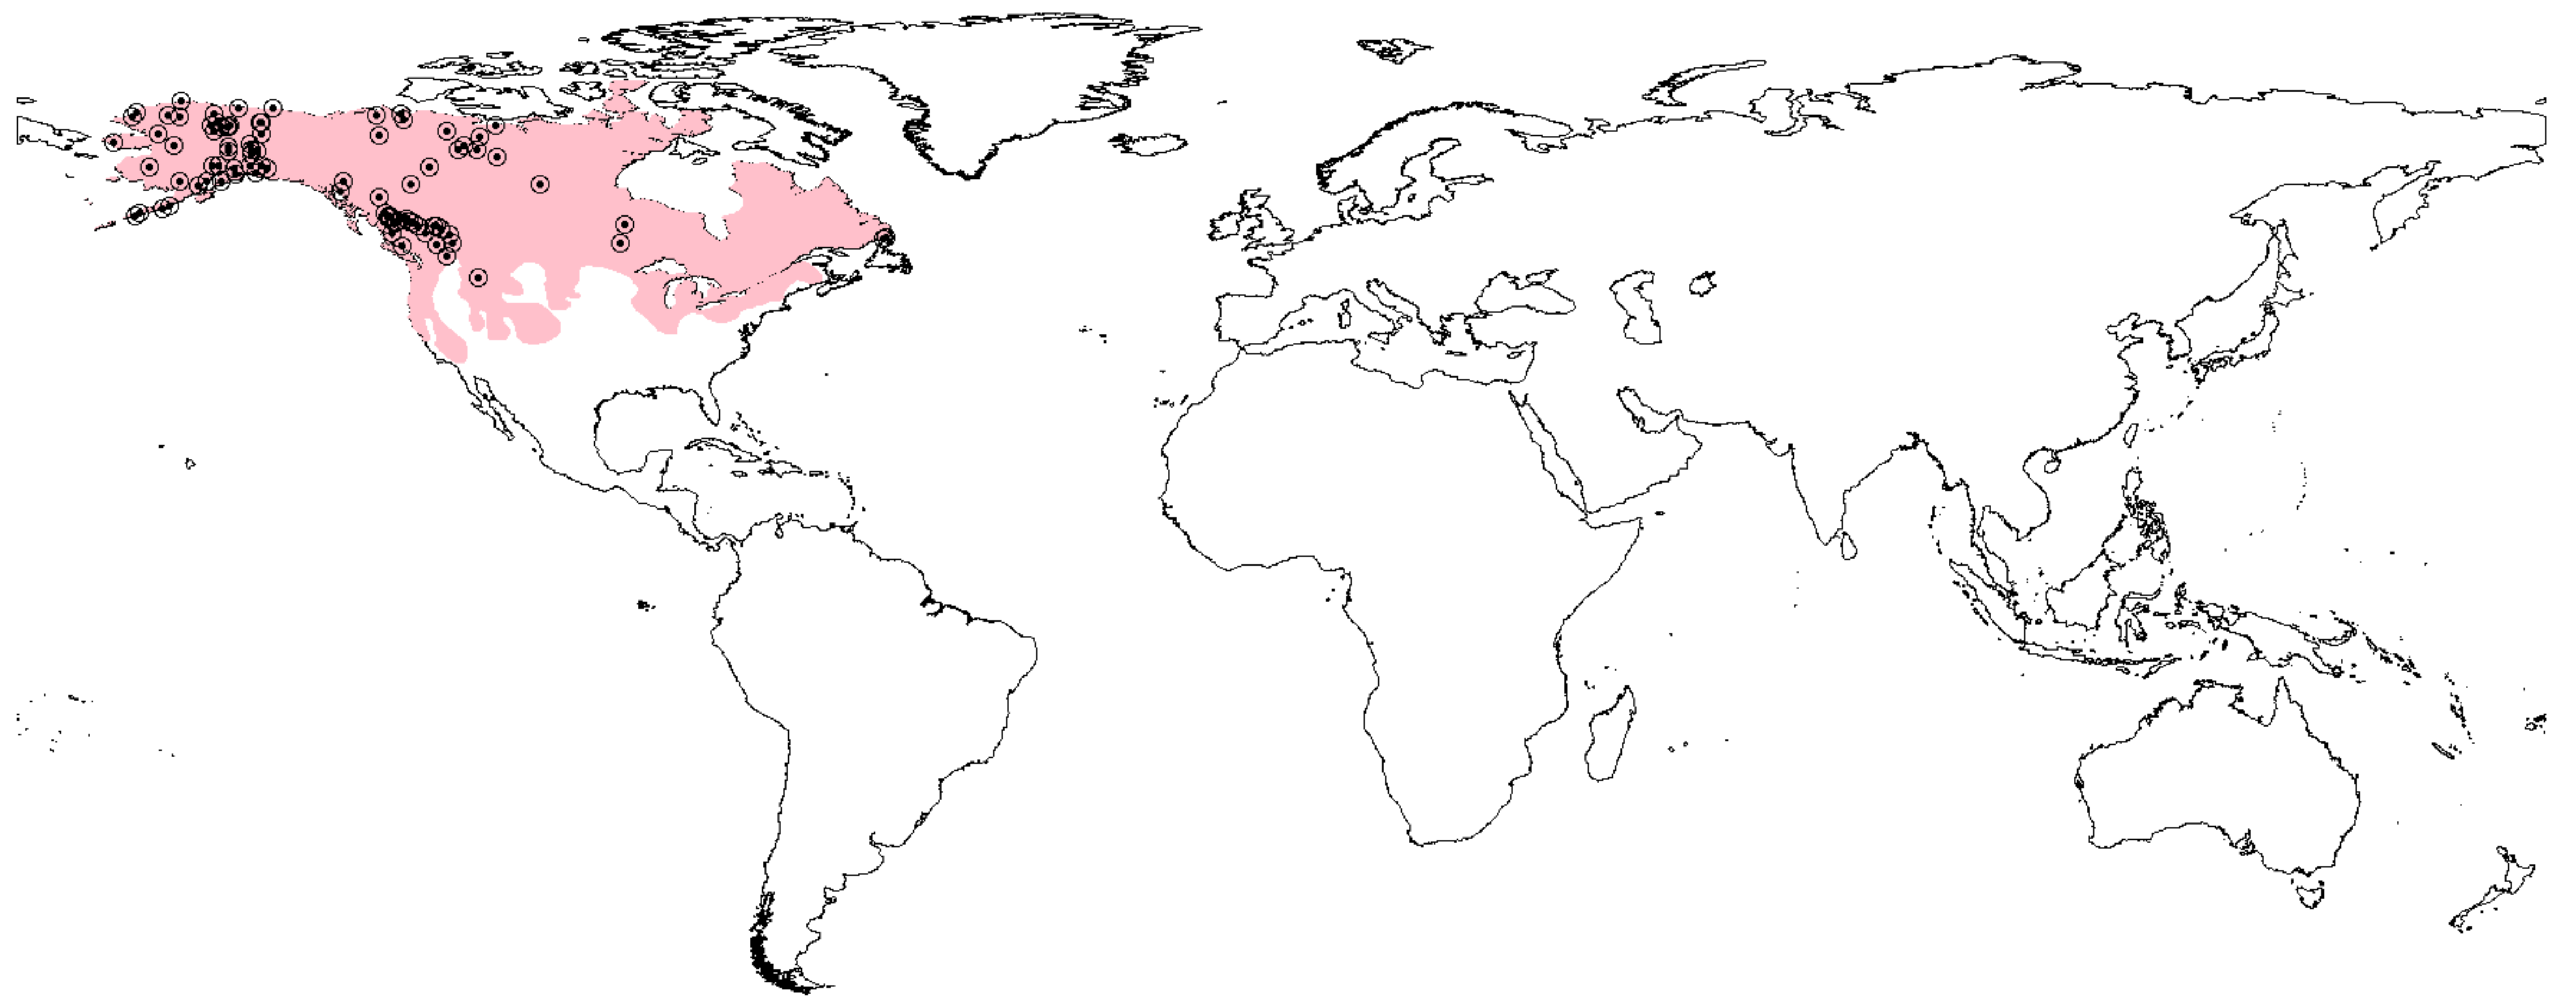

*Gulo gulo*

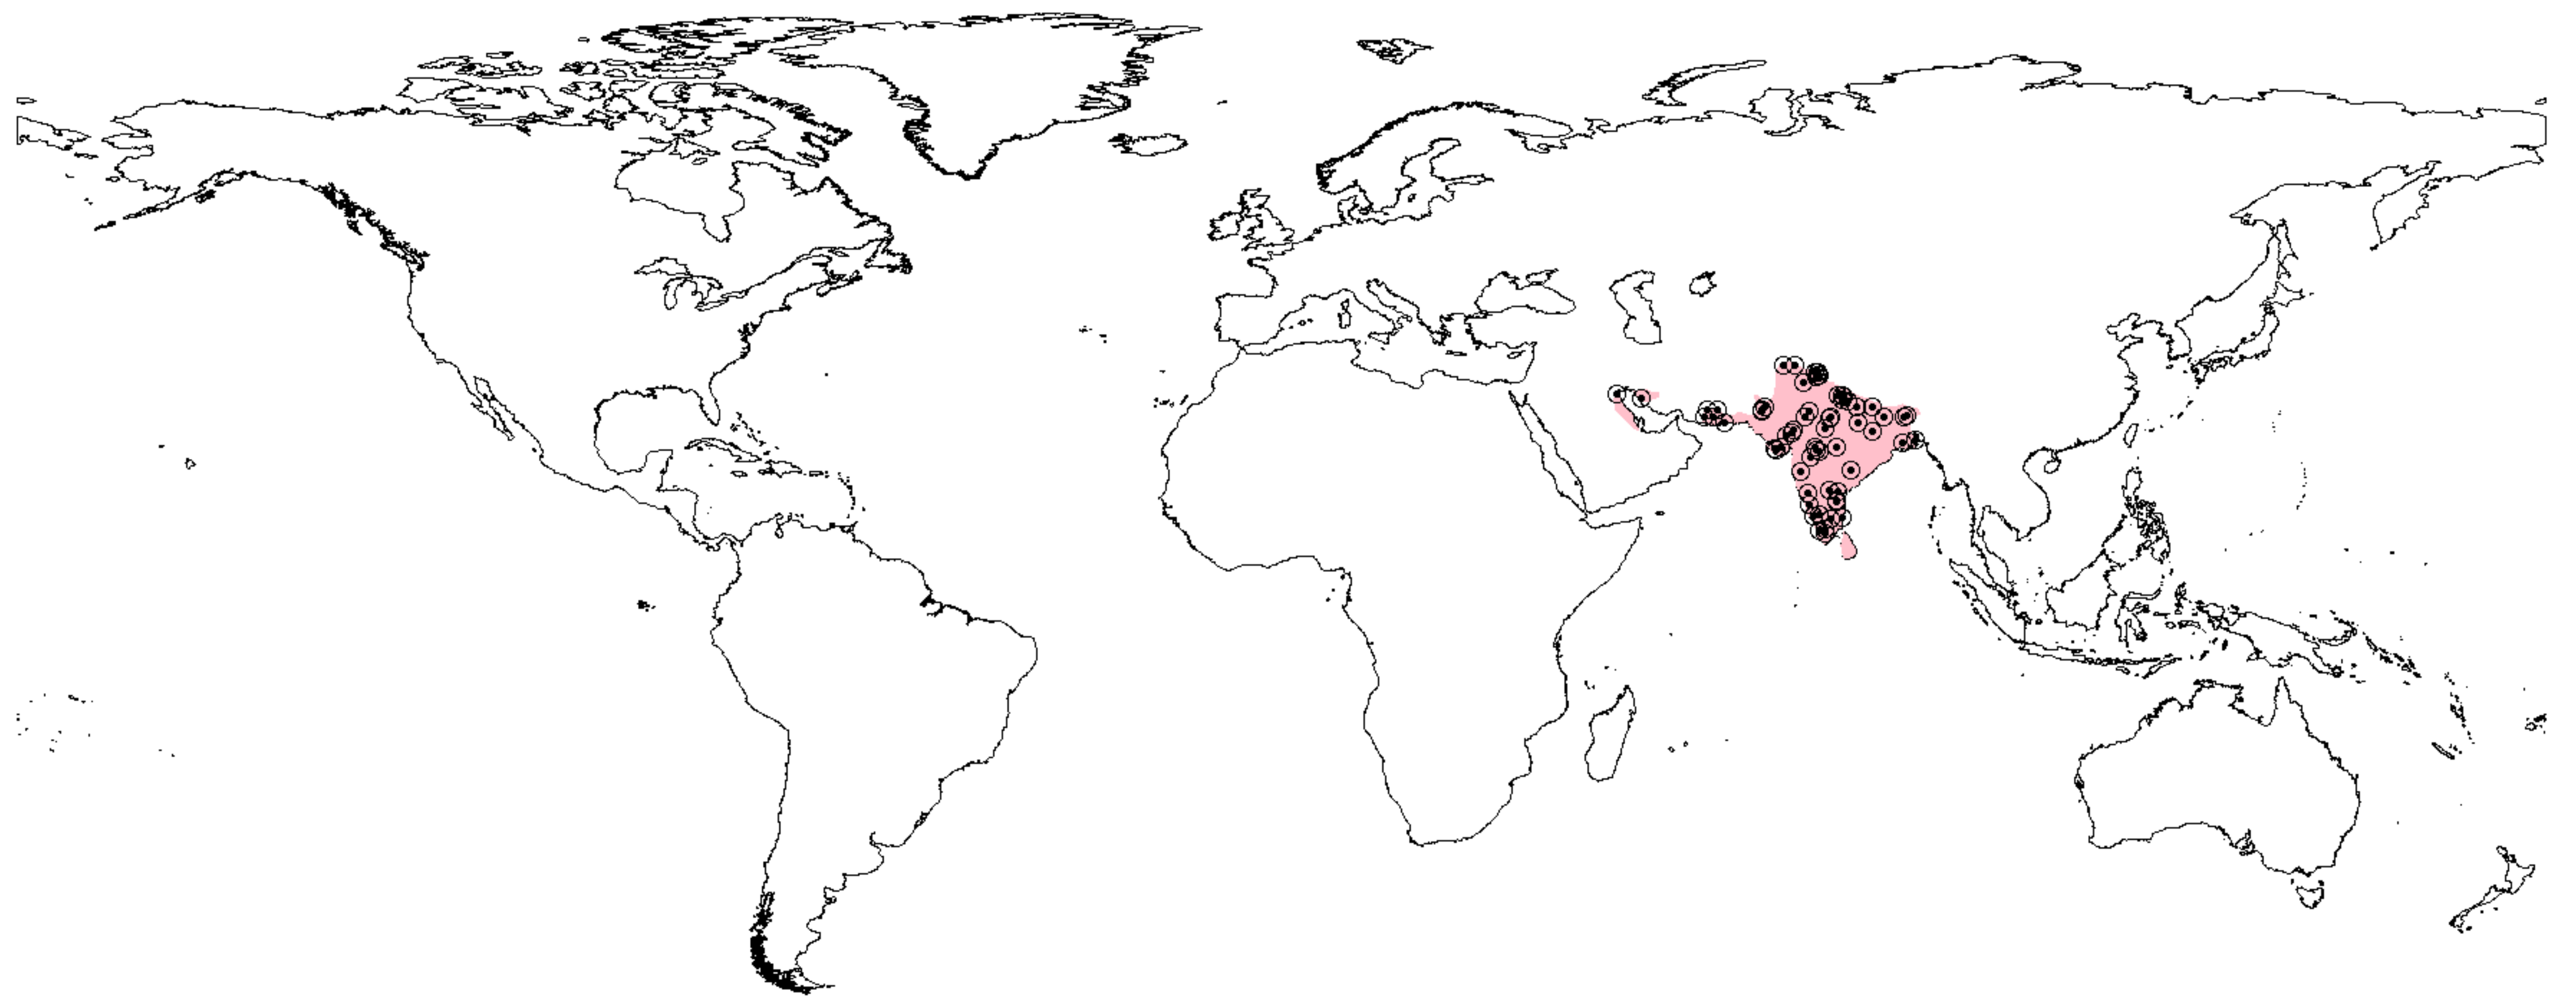

*Herpestes edwardsii*

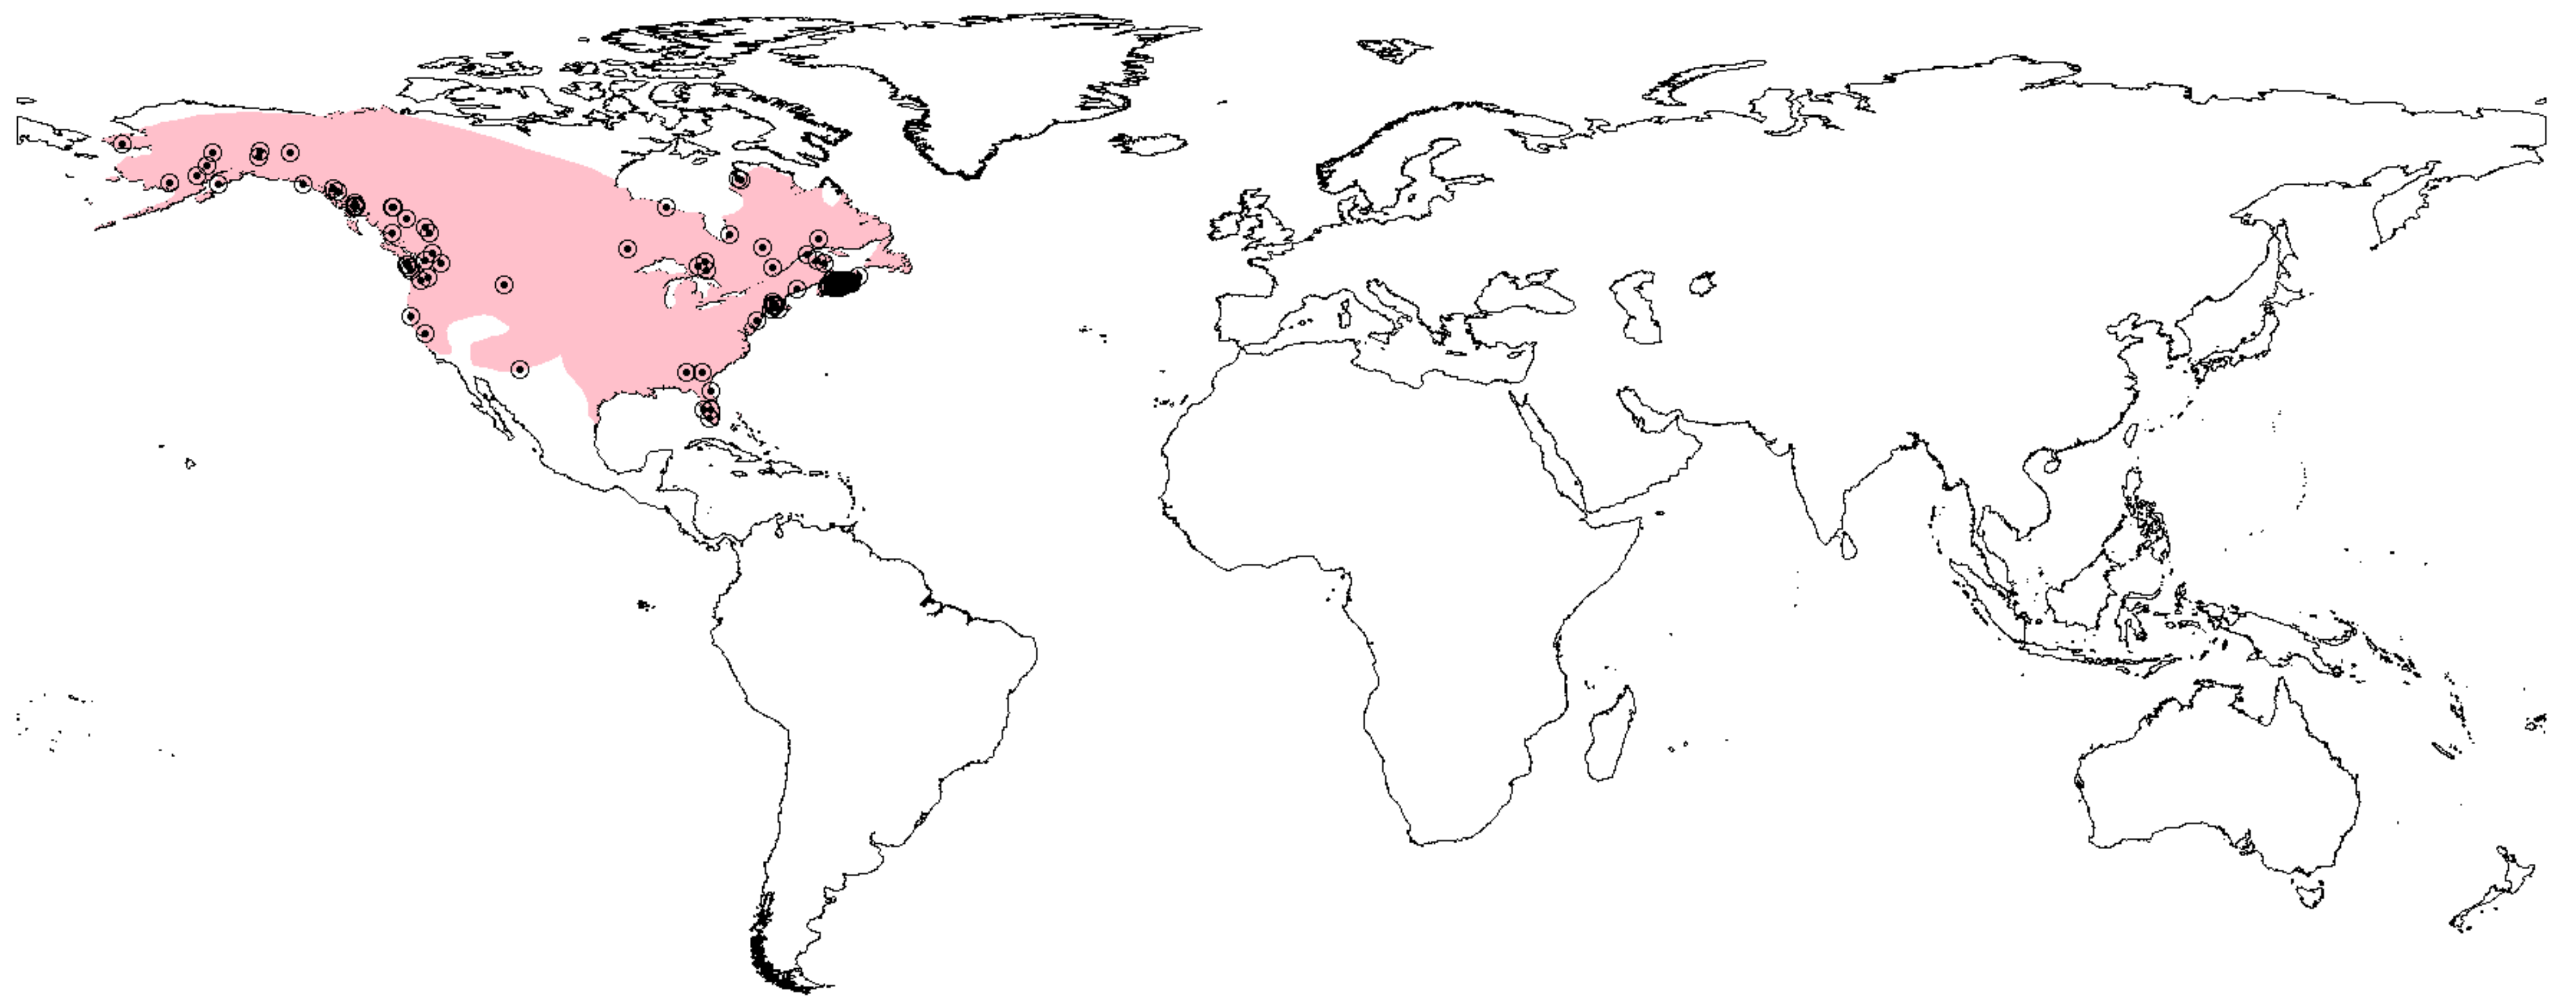

*Lontra canadensis*



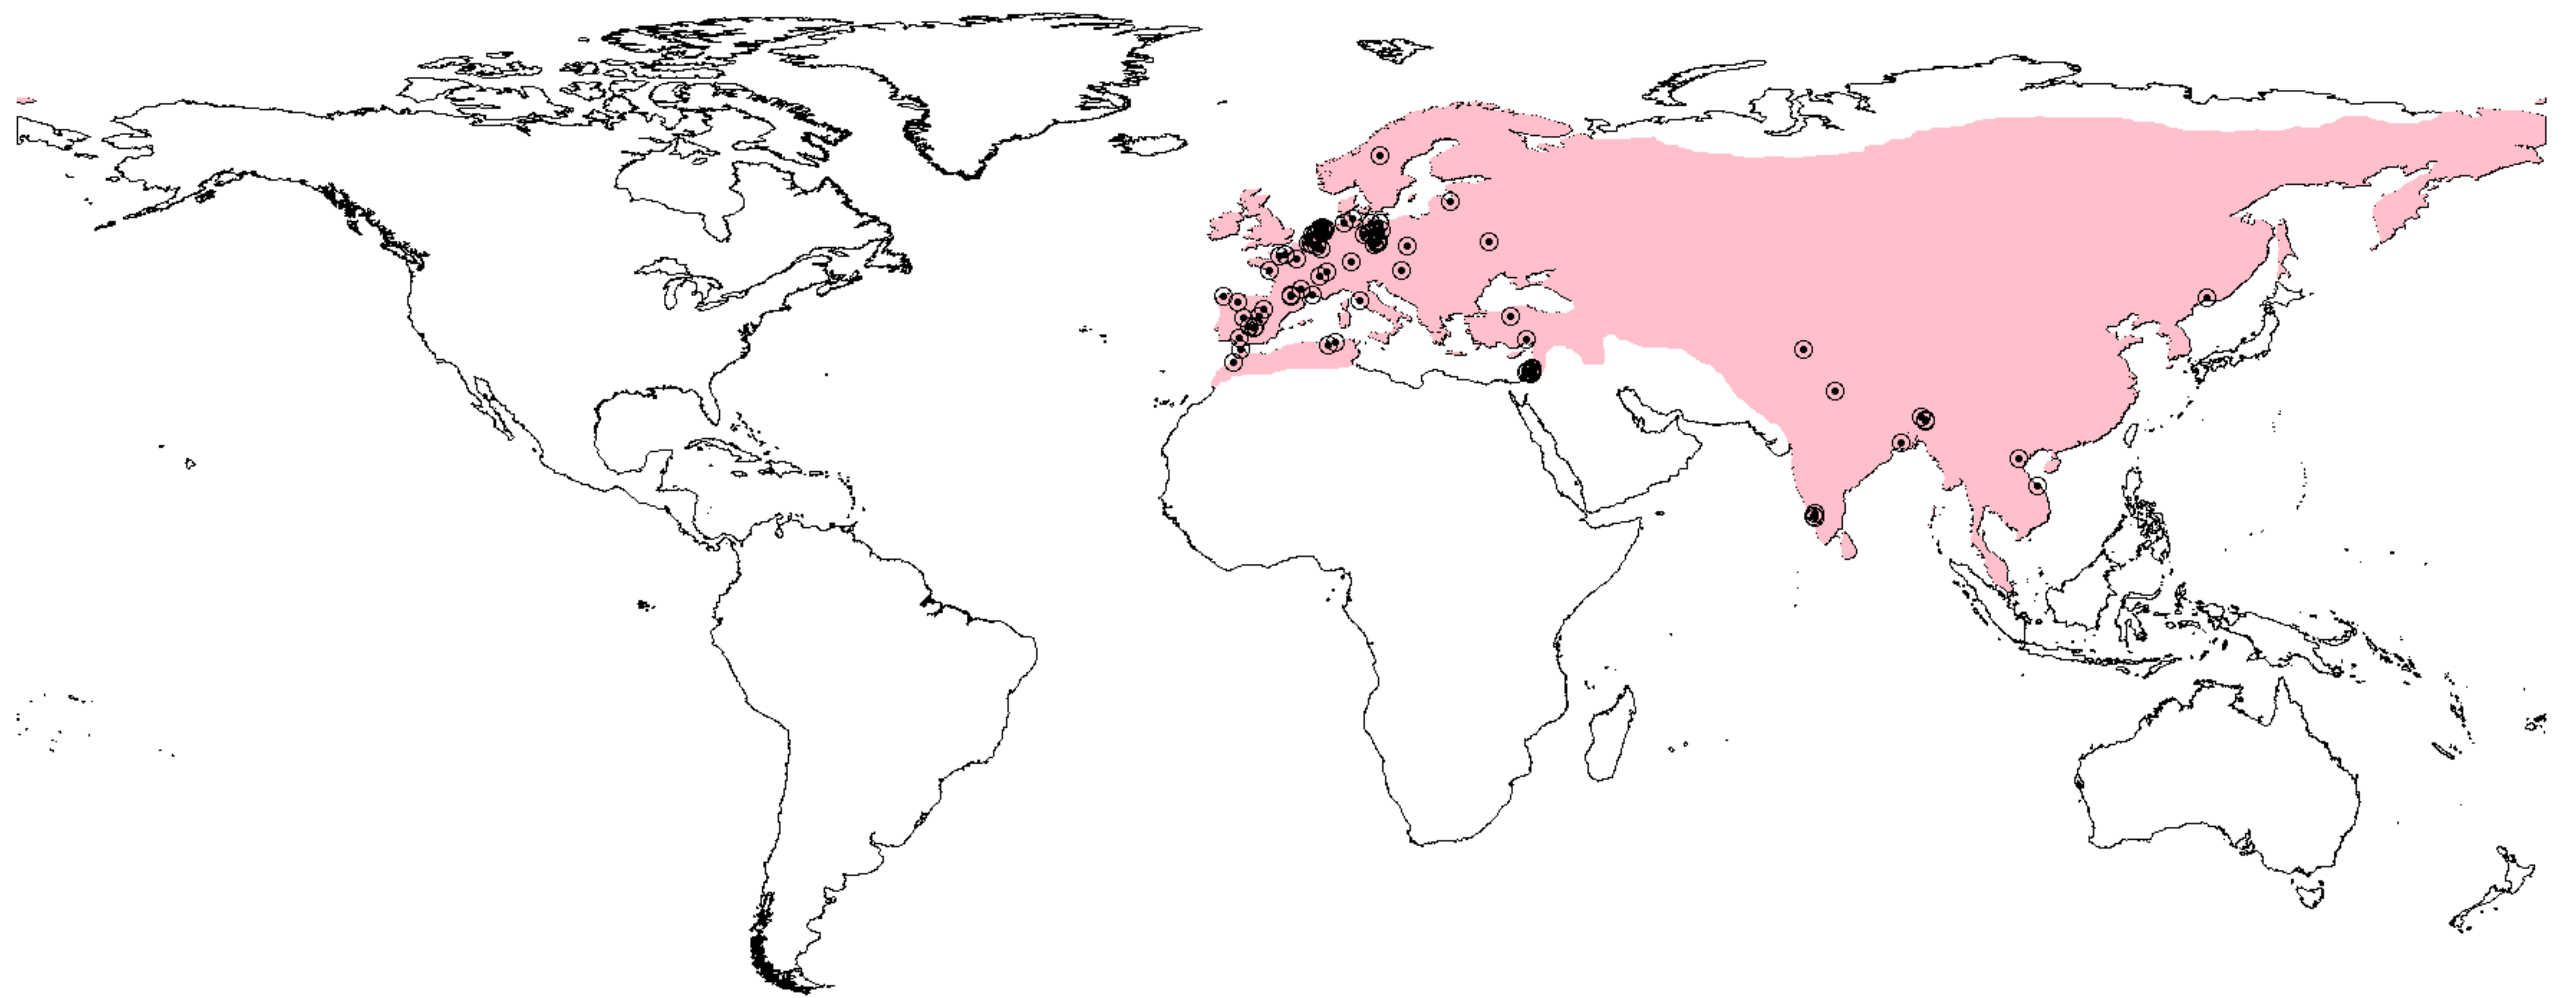

*Lutra lutra*

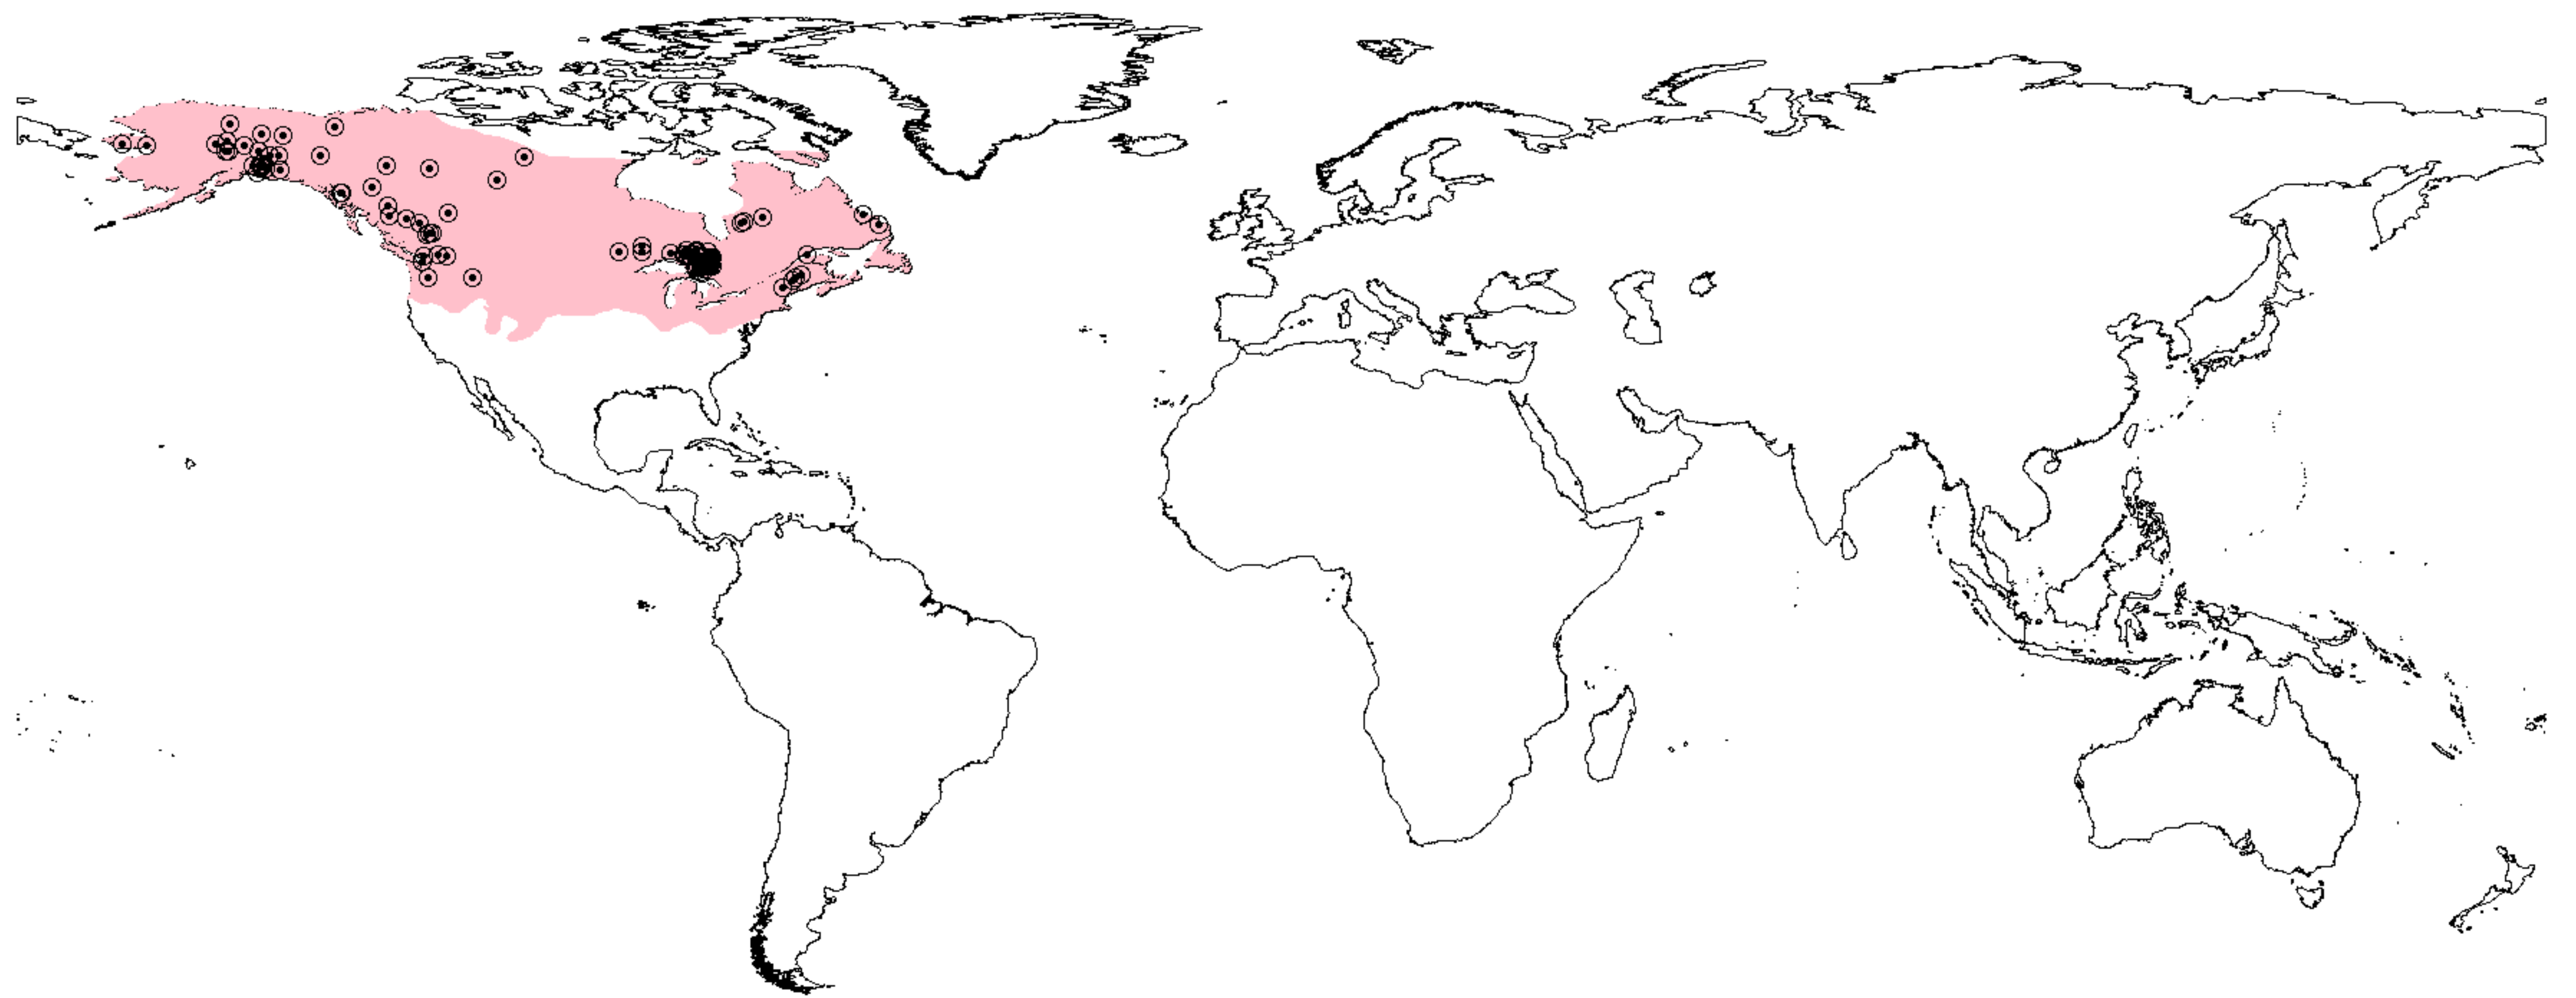

*Lynx canadensis*

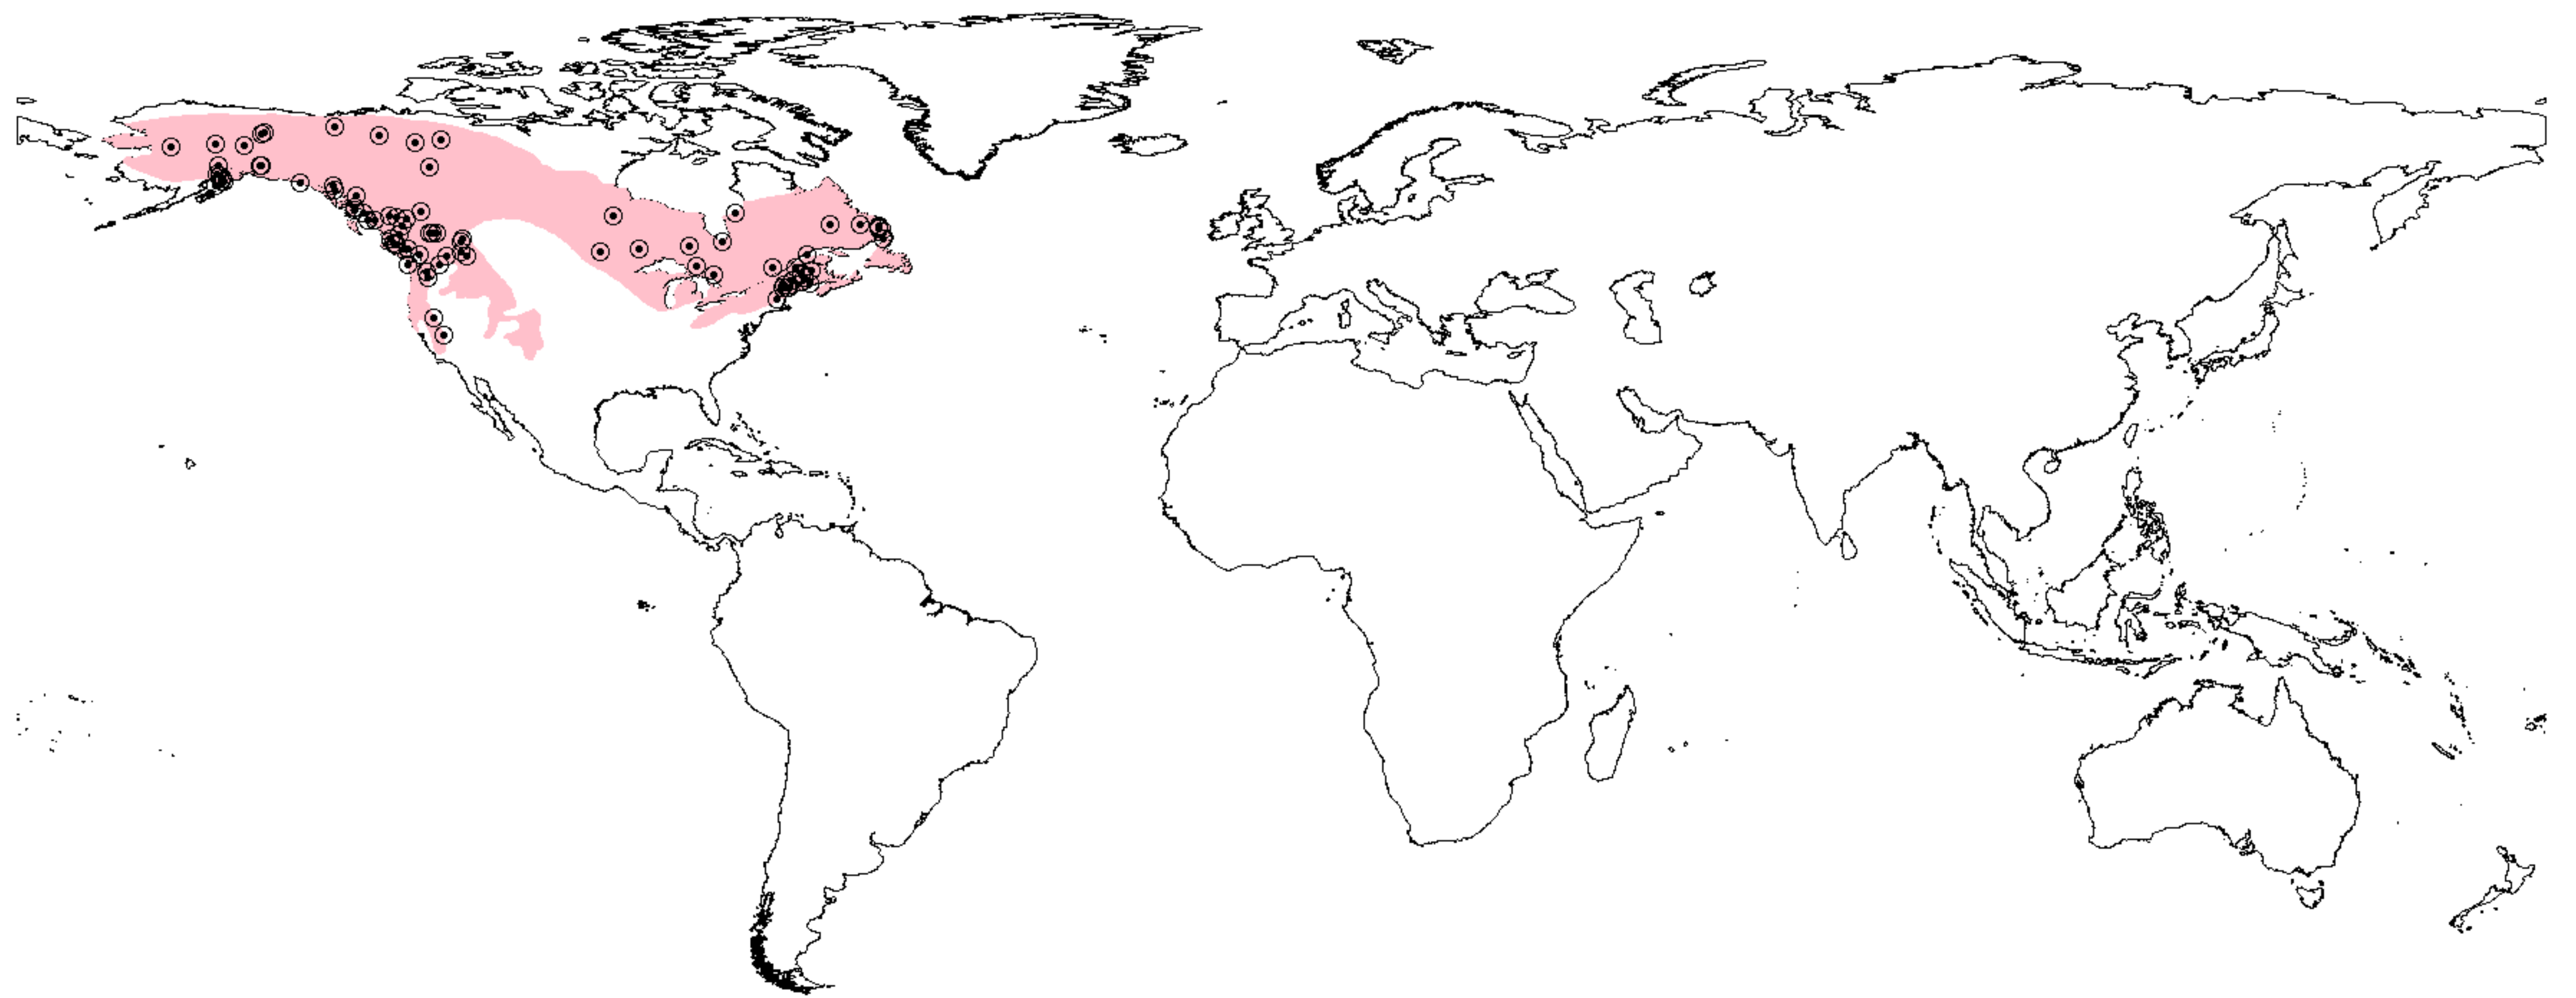

*Martes americana*

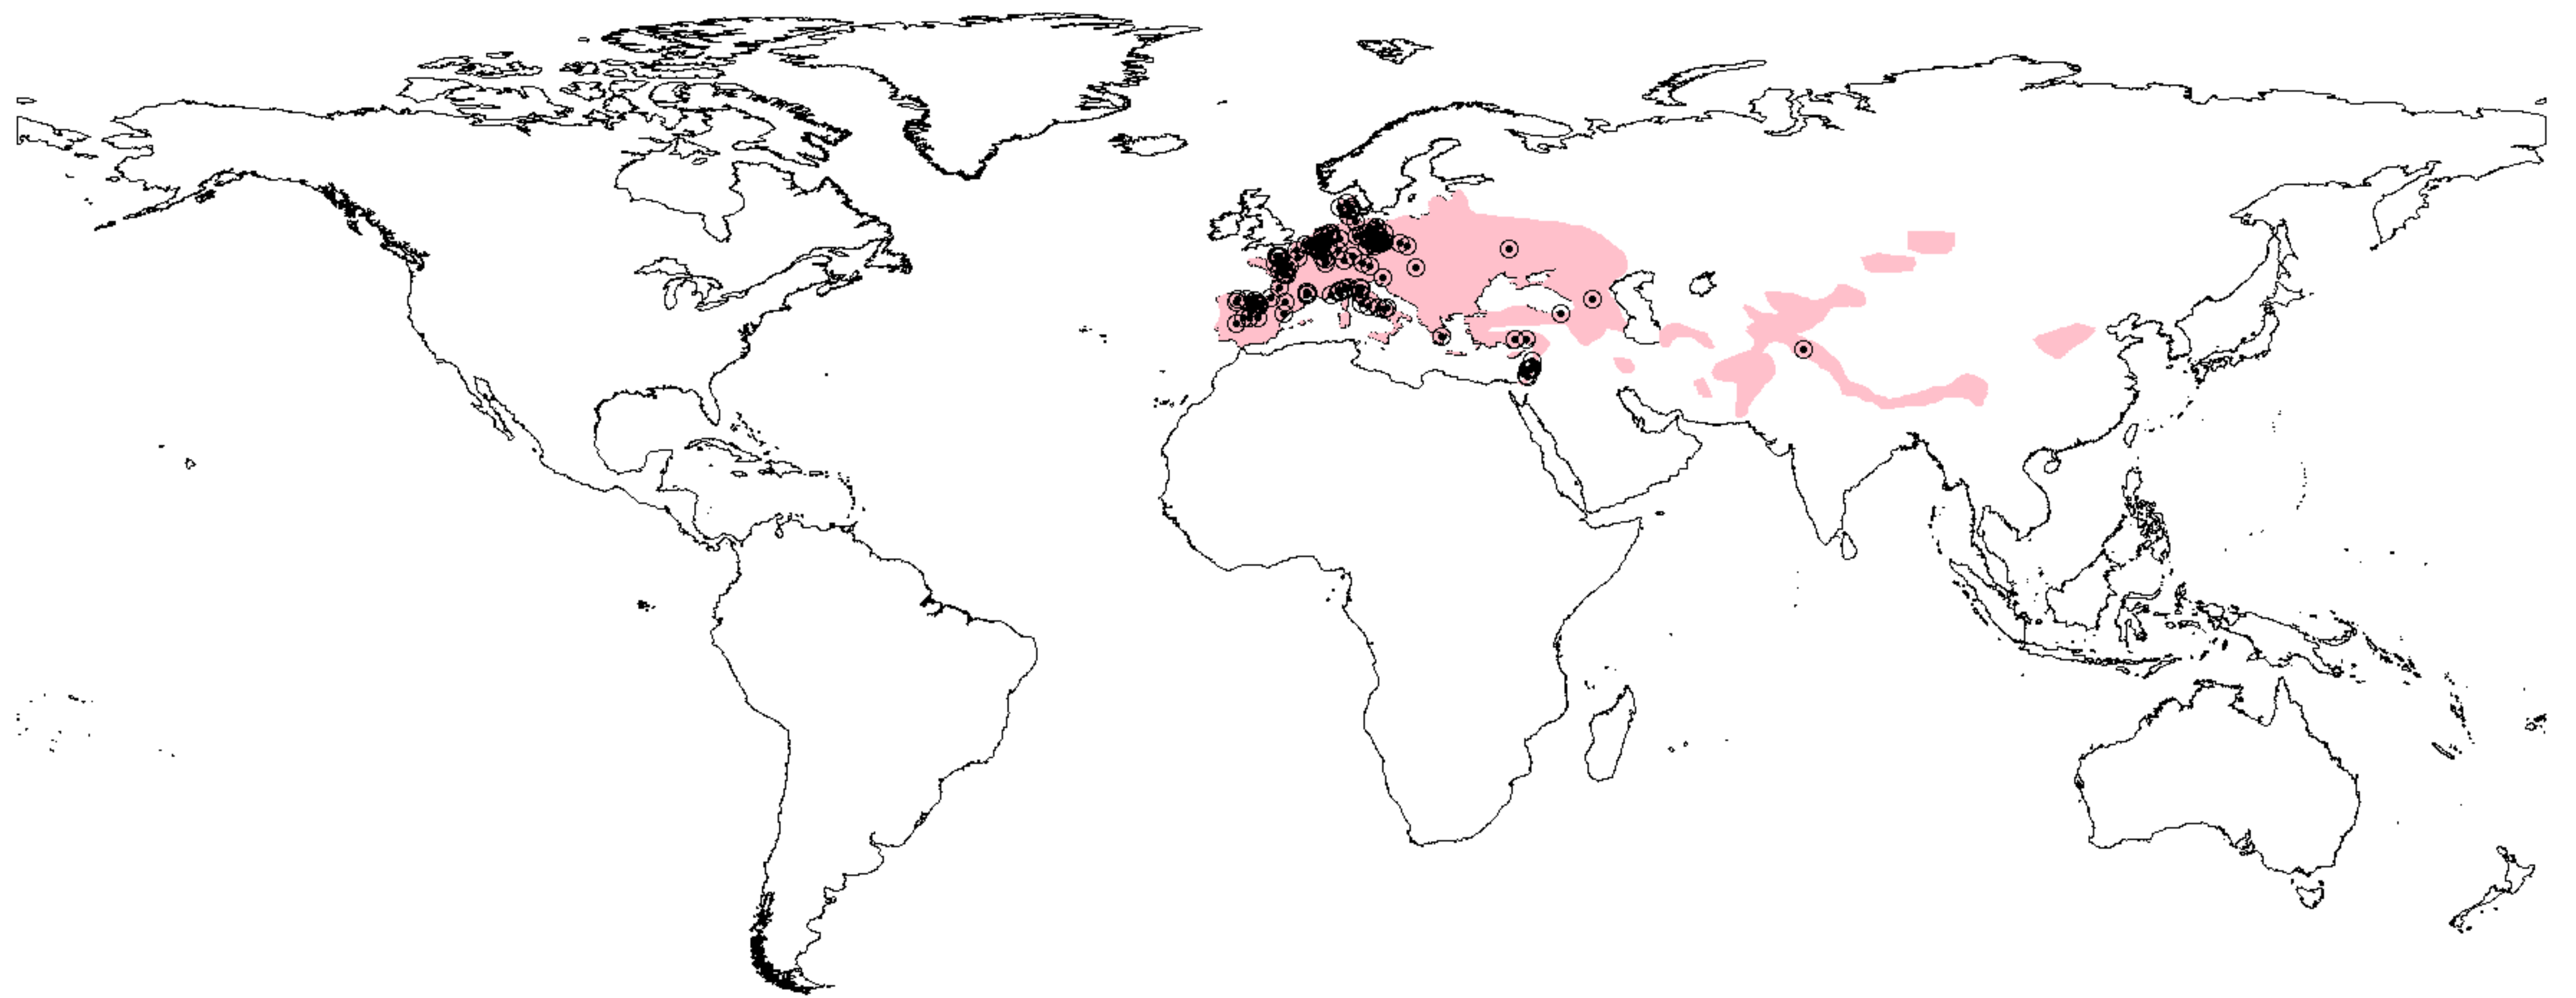

*Martes foina*



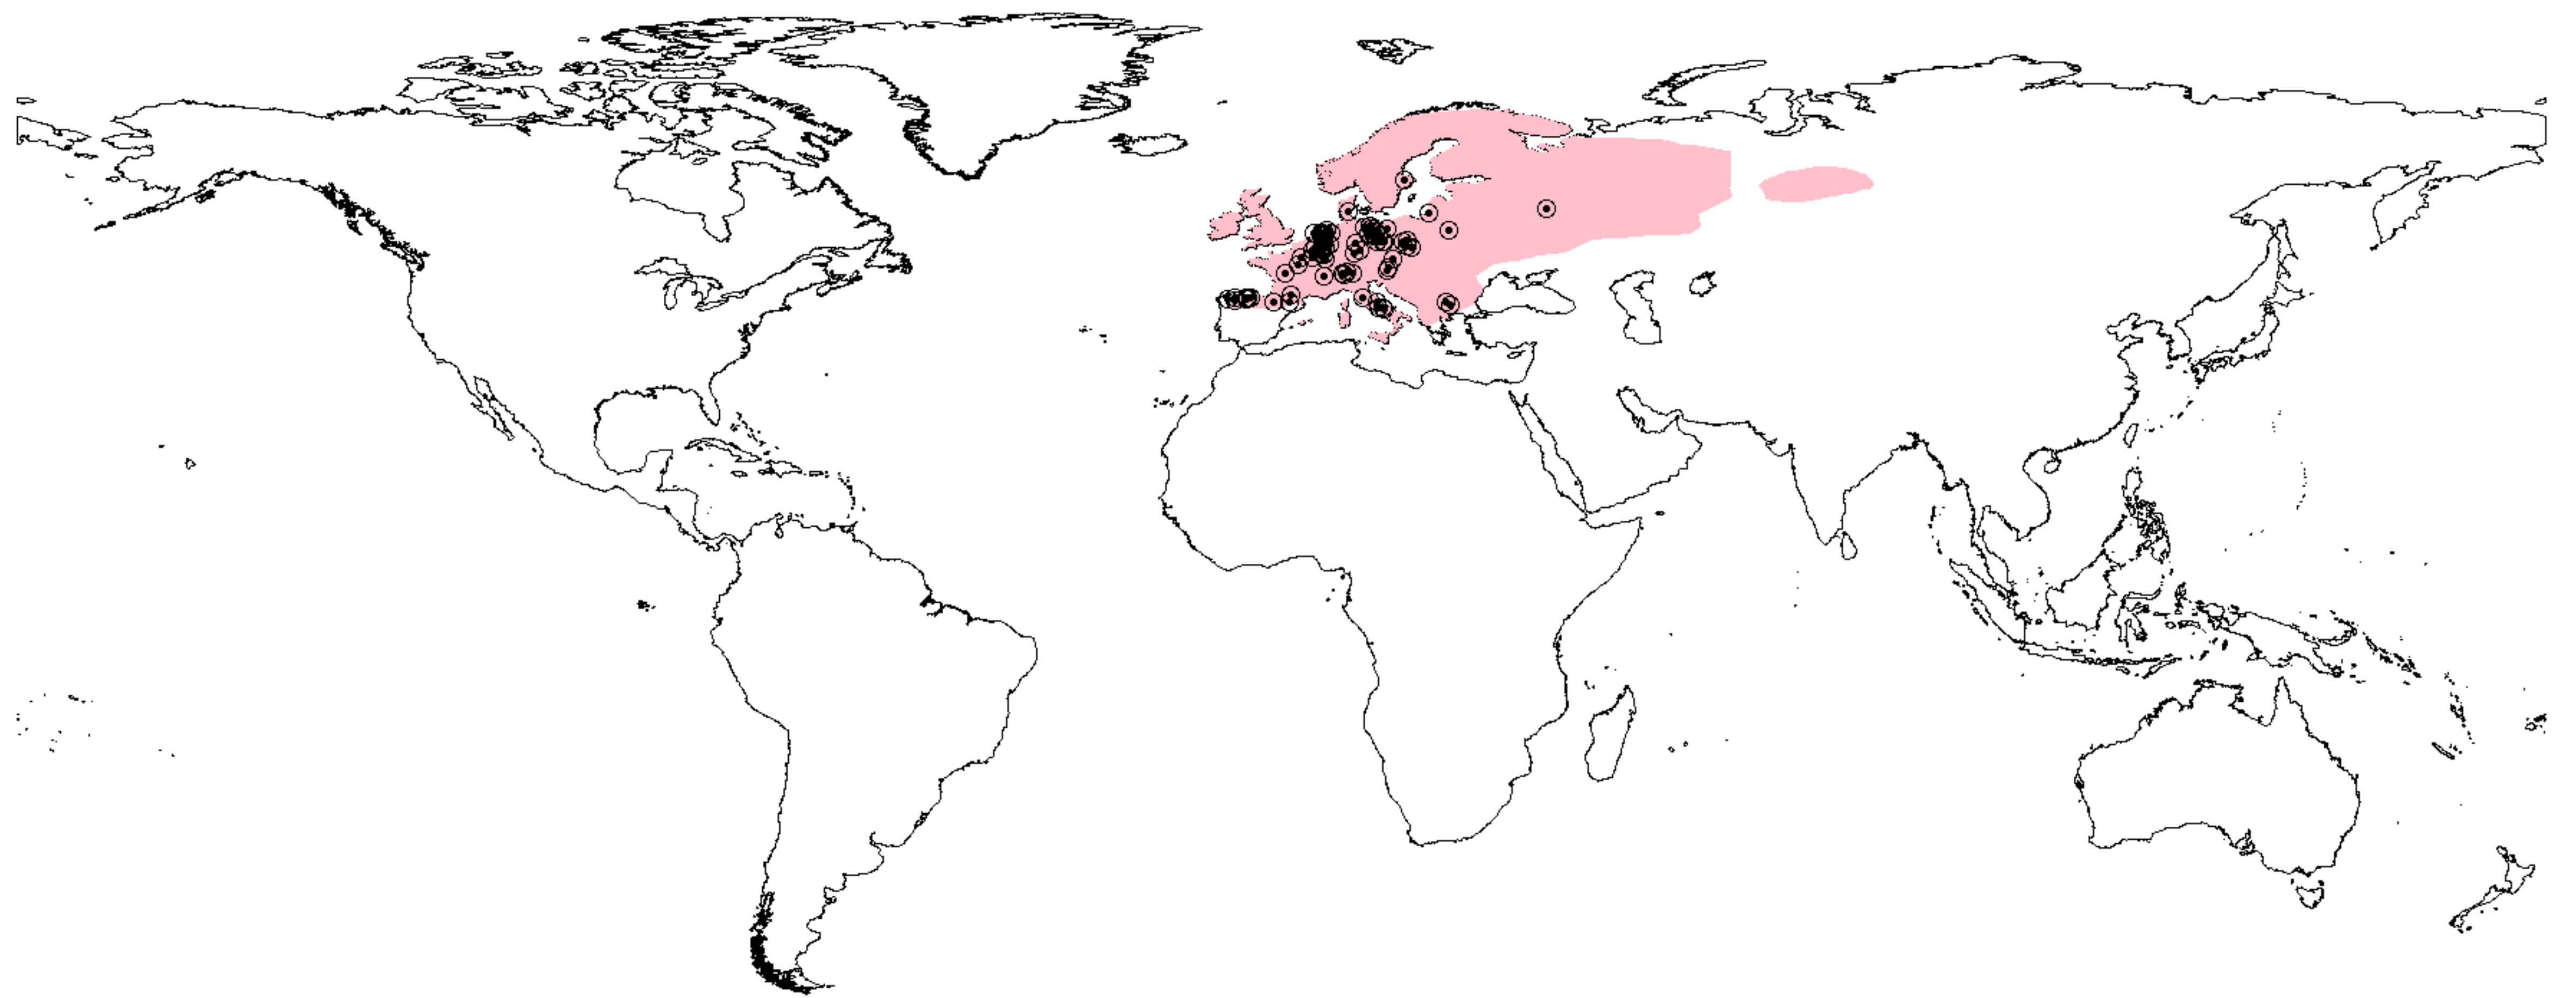

Martes martes

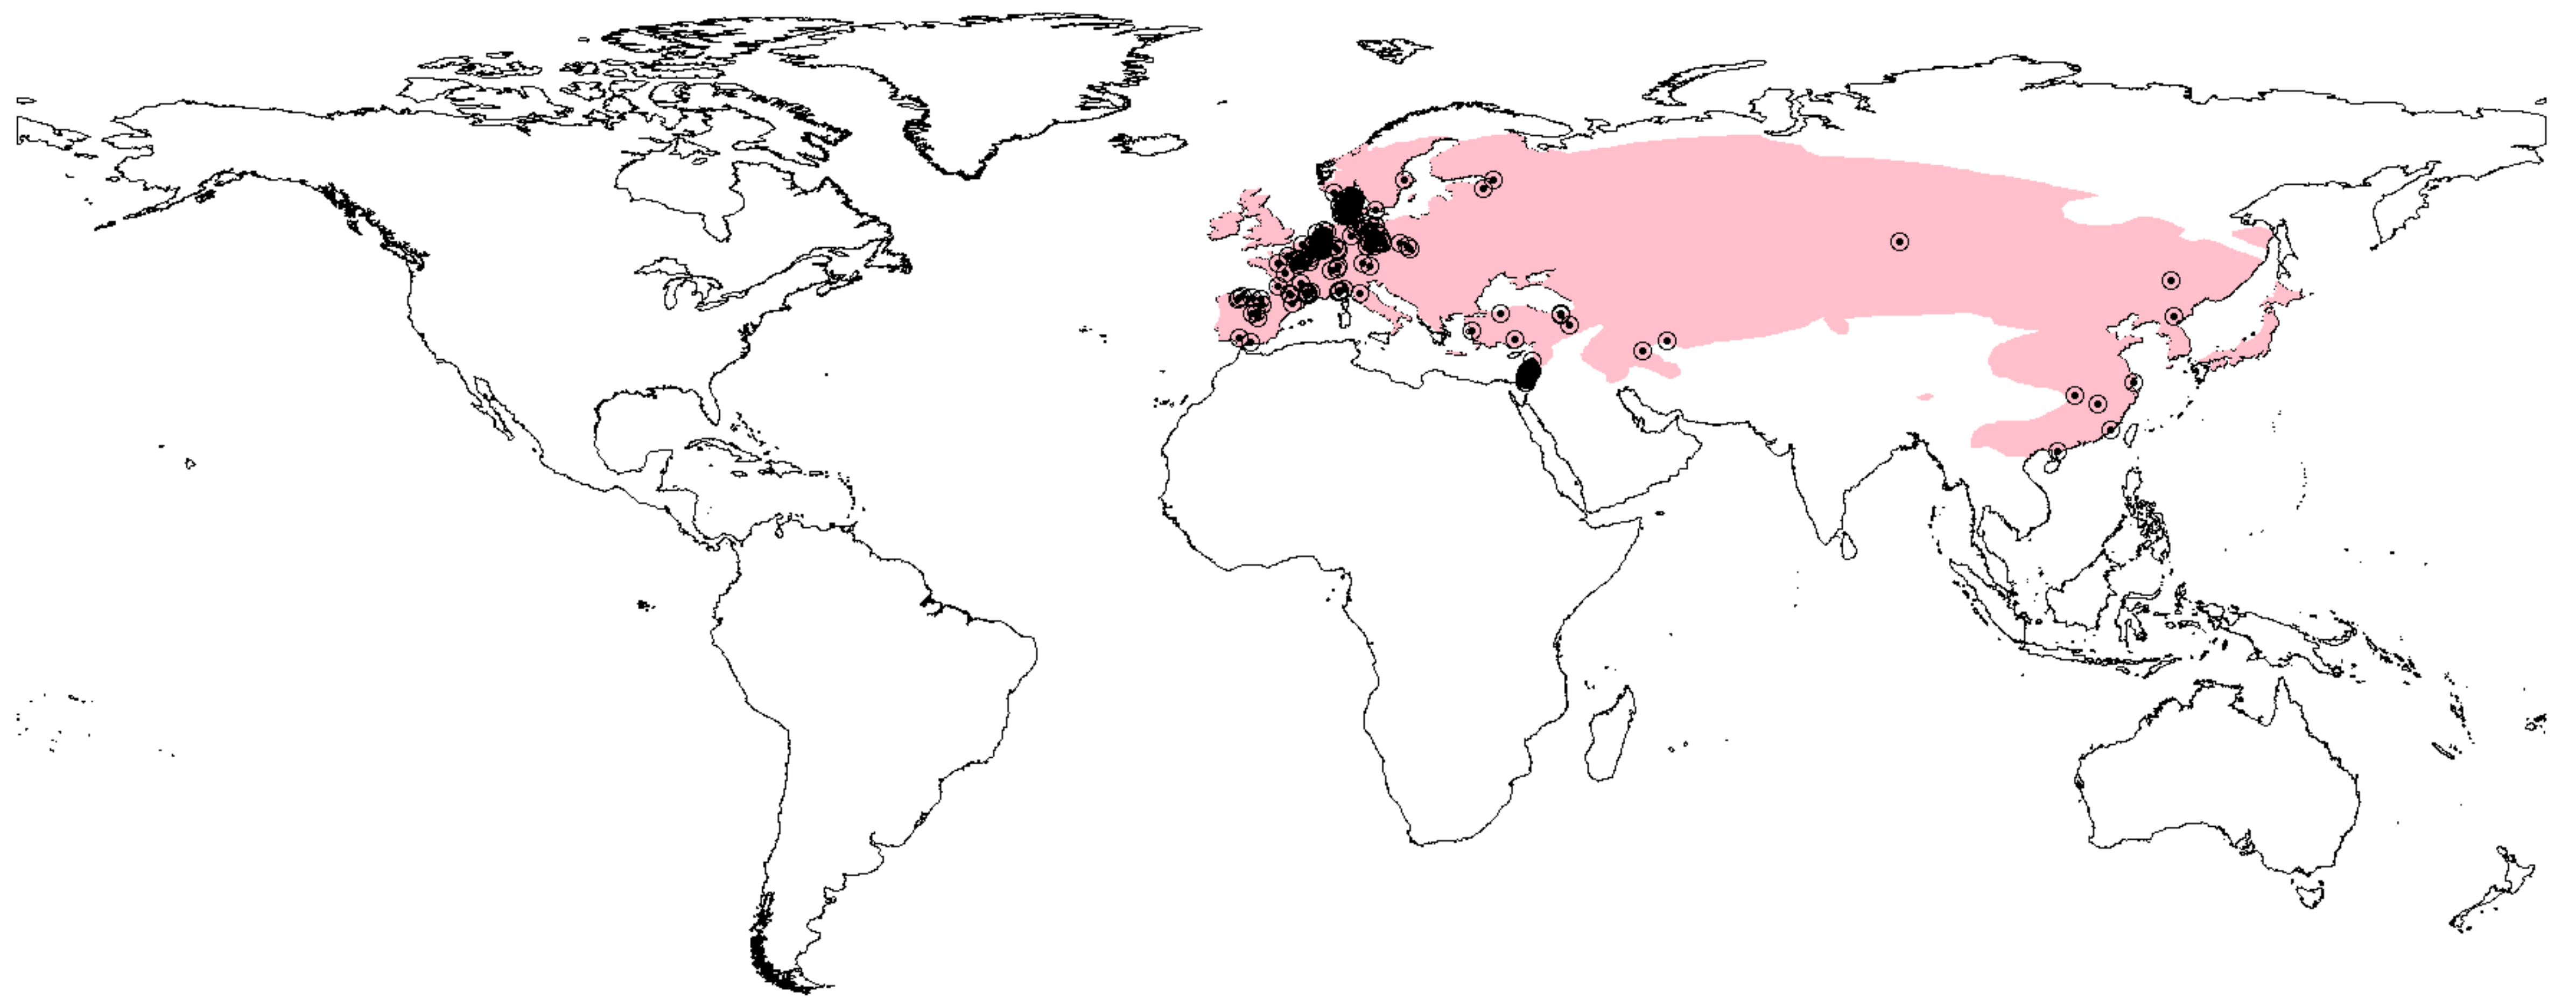

*Meles meles*

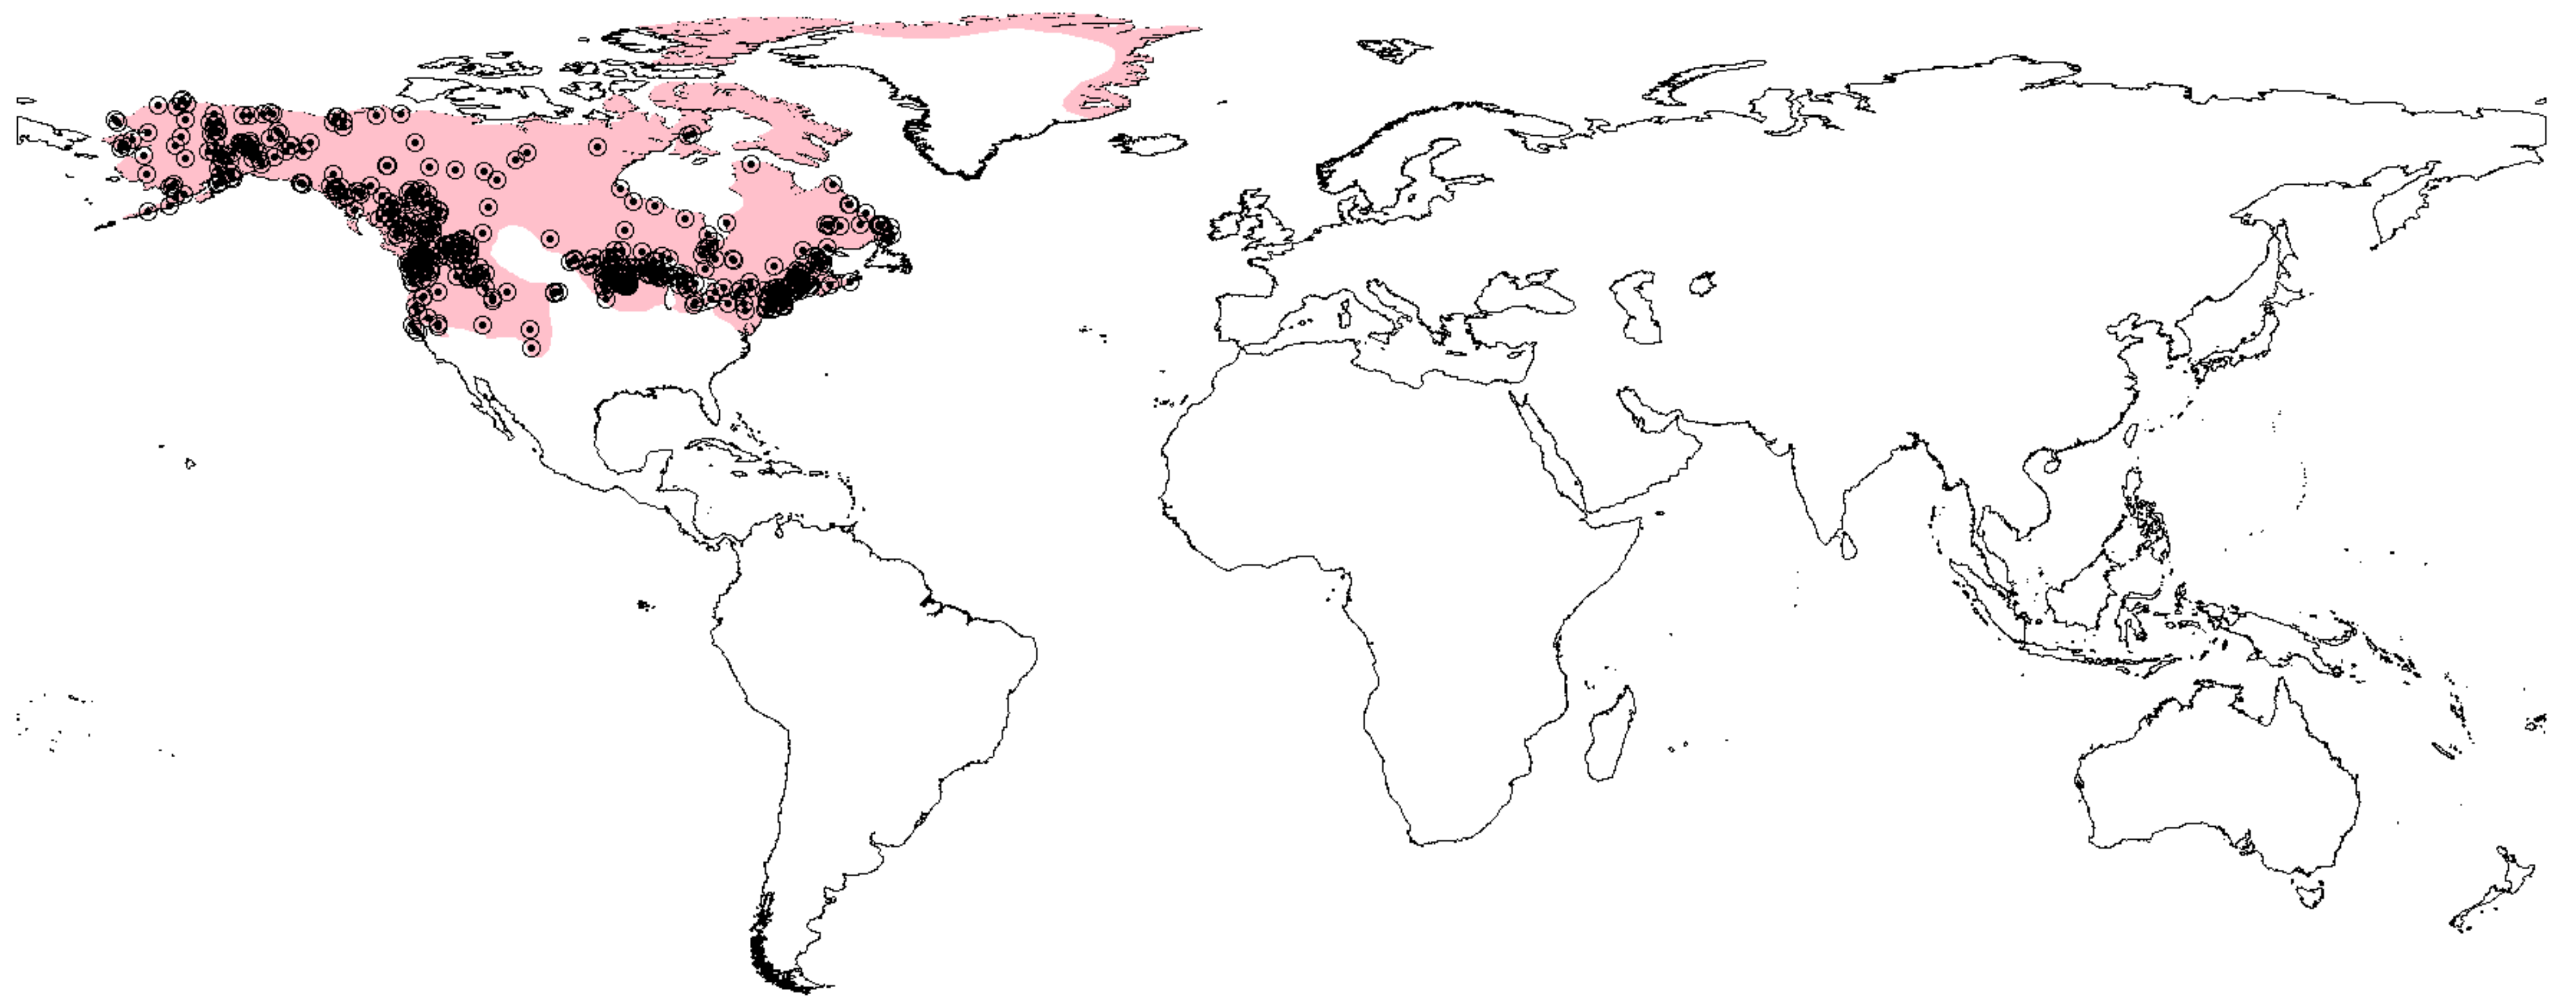

*Mustela erminea* Nearctic

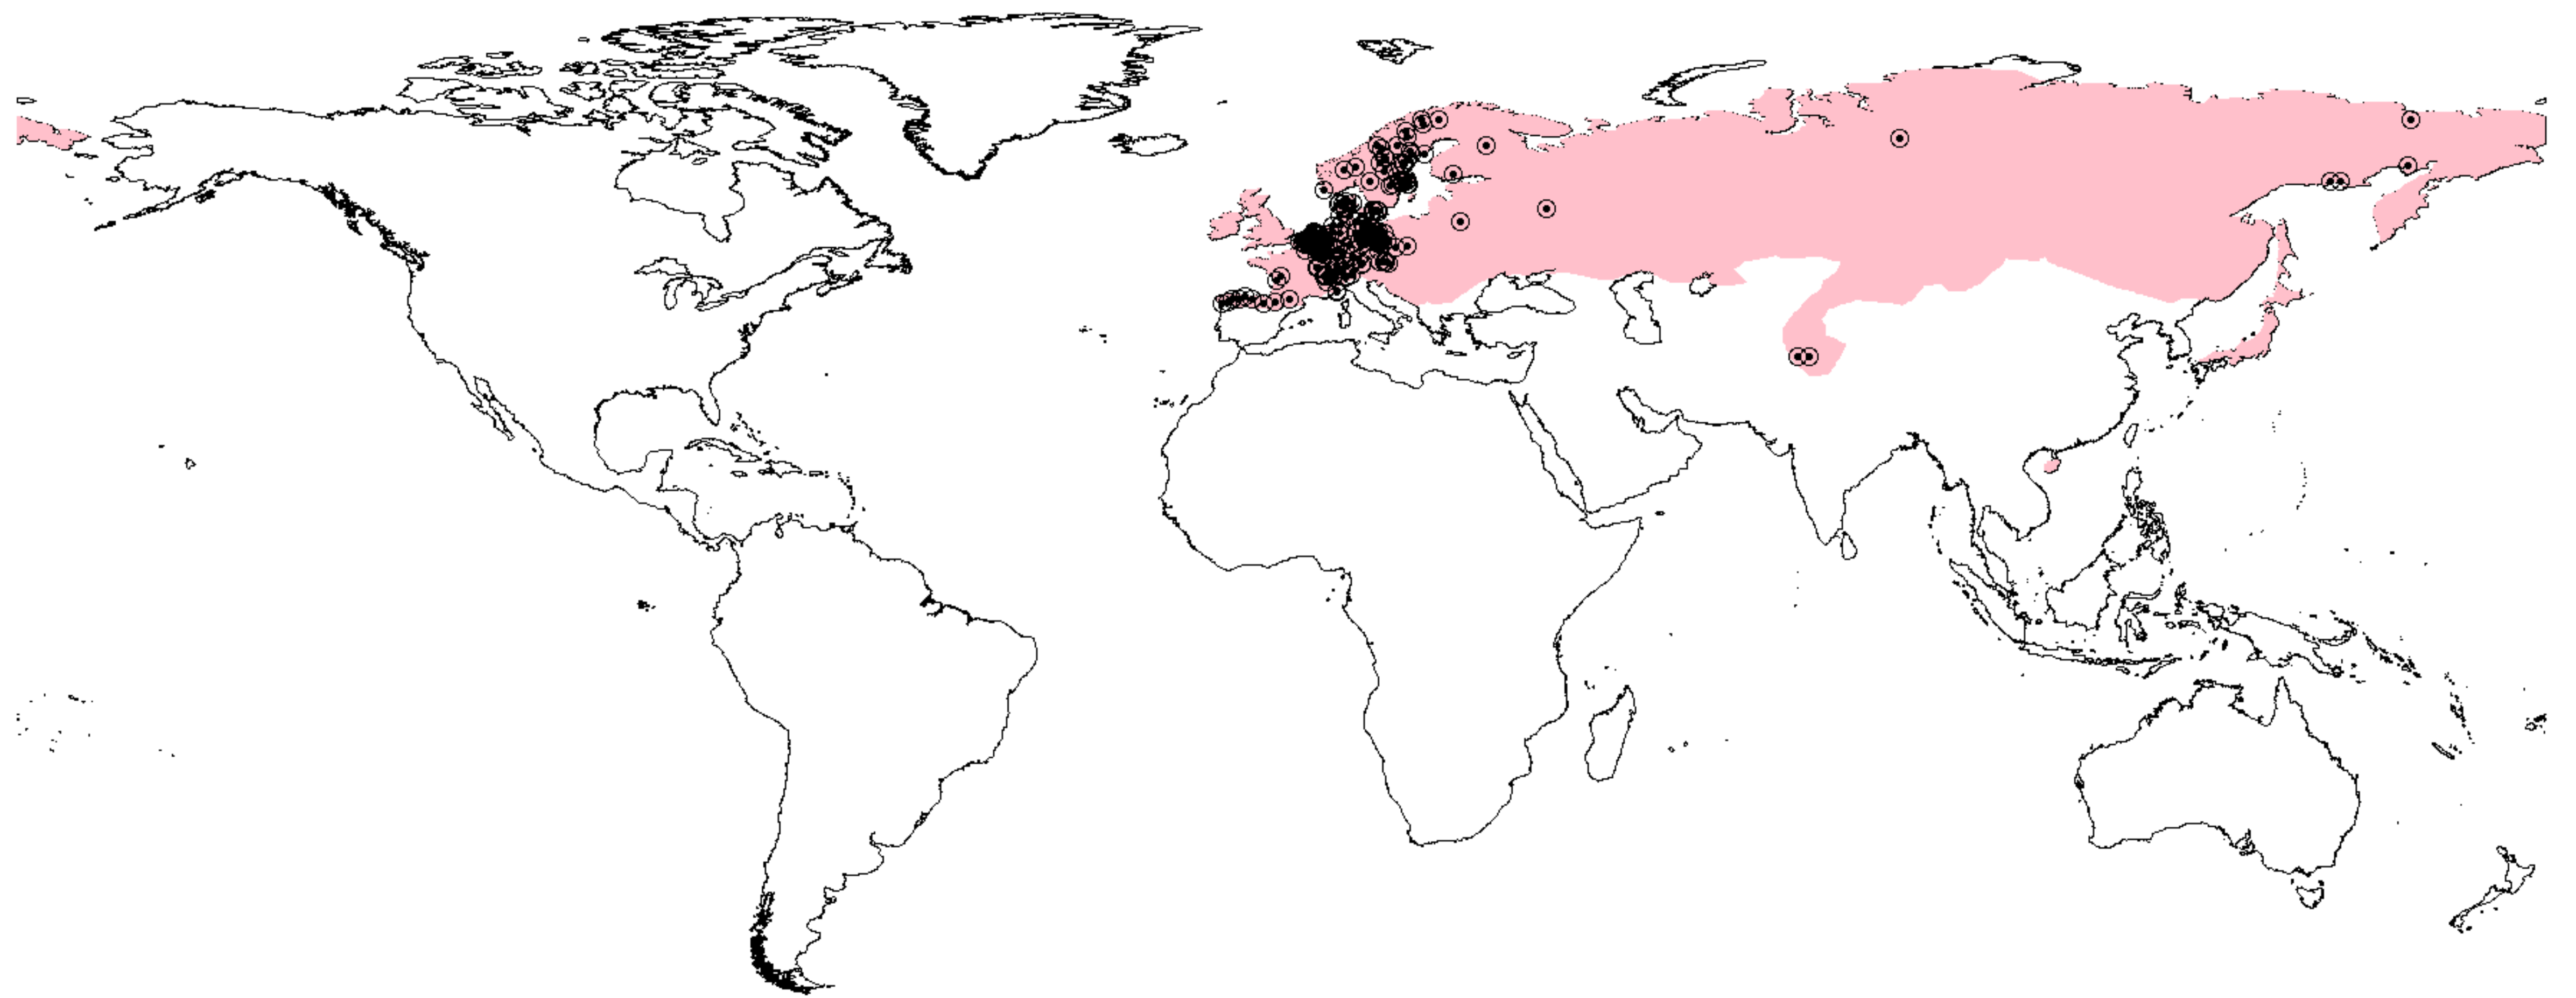

*Mustela erminea* Palearctic



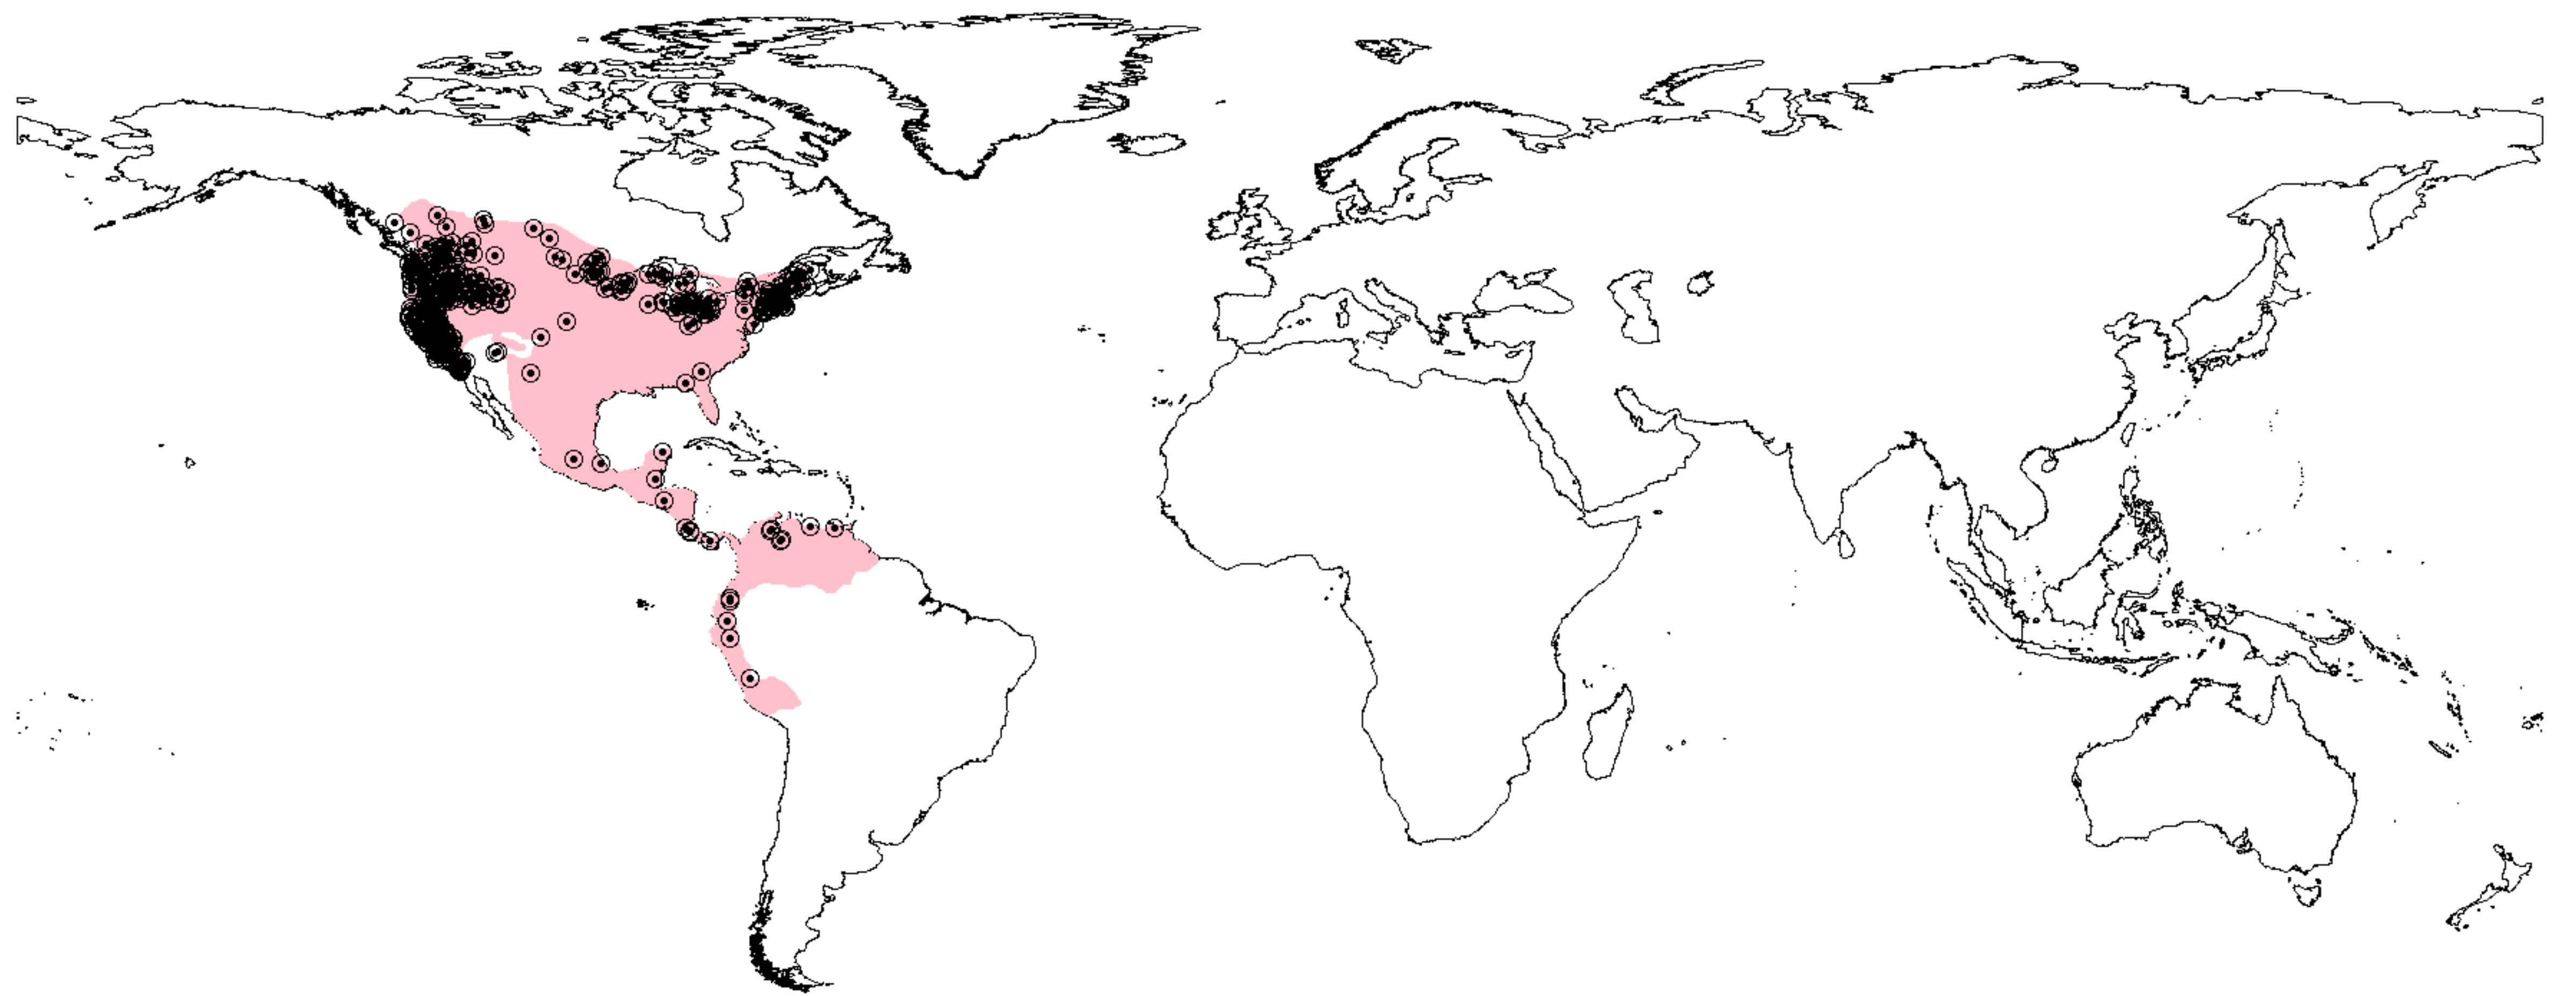

*Mustela frenata*

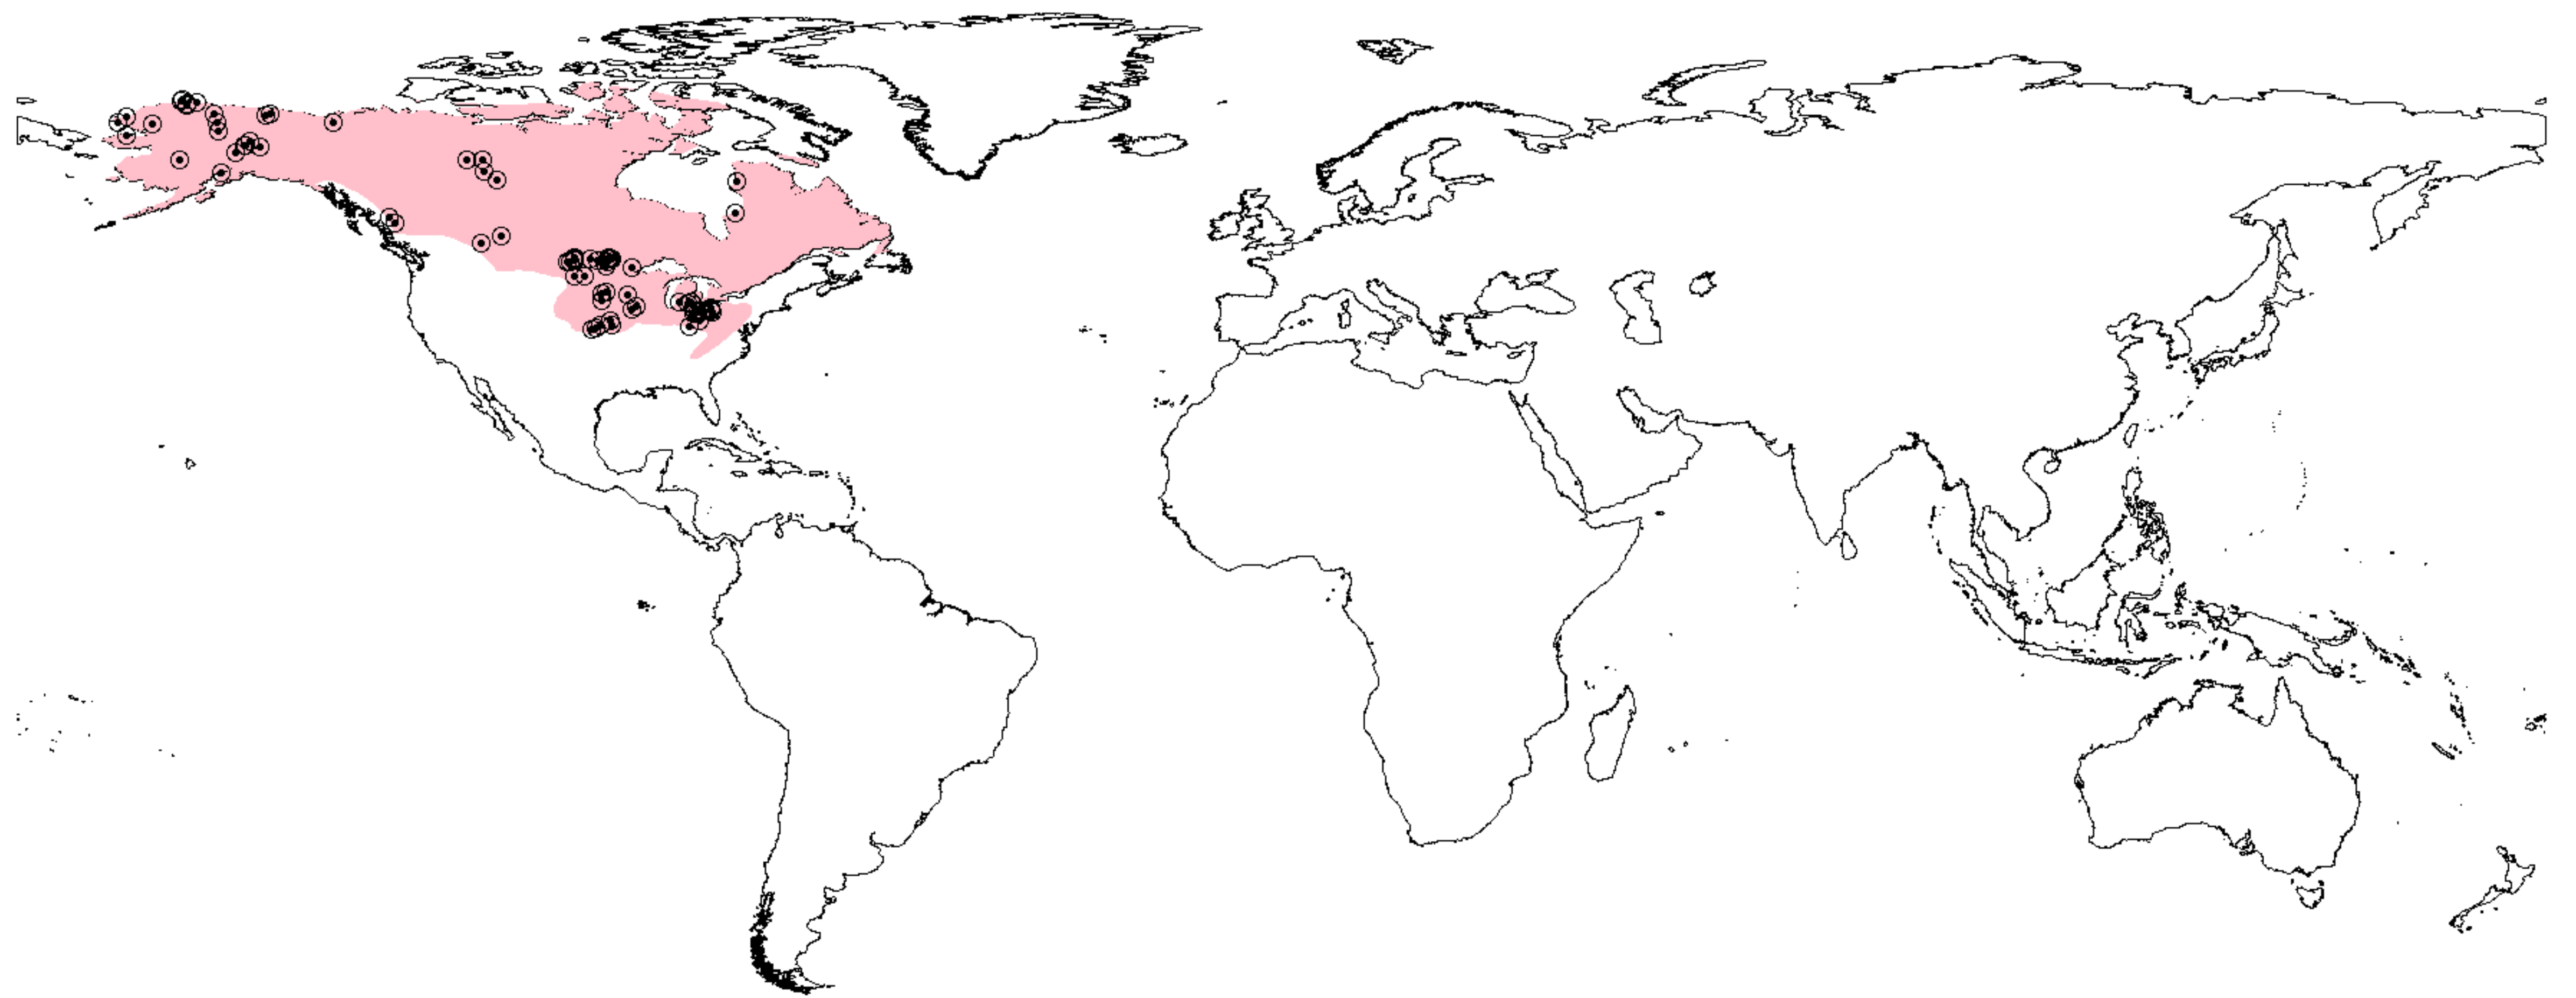

*Mustela nivalis* Nearctic

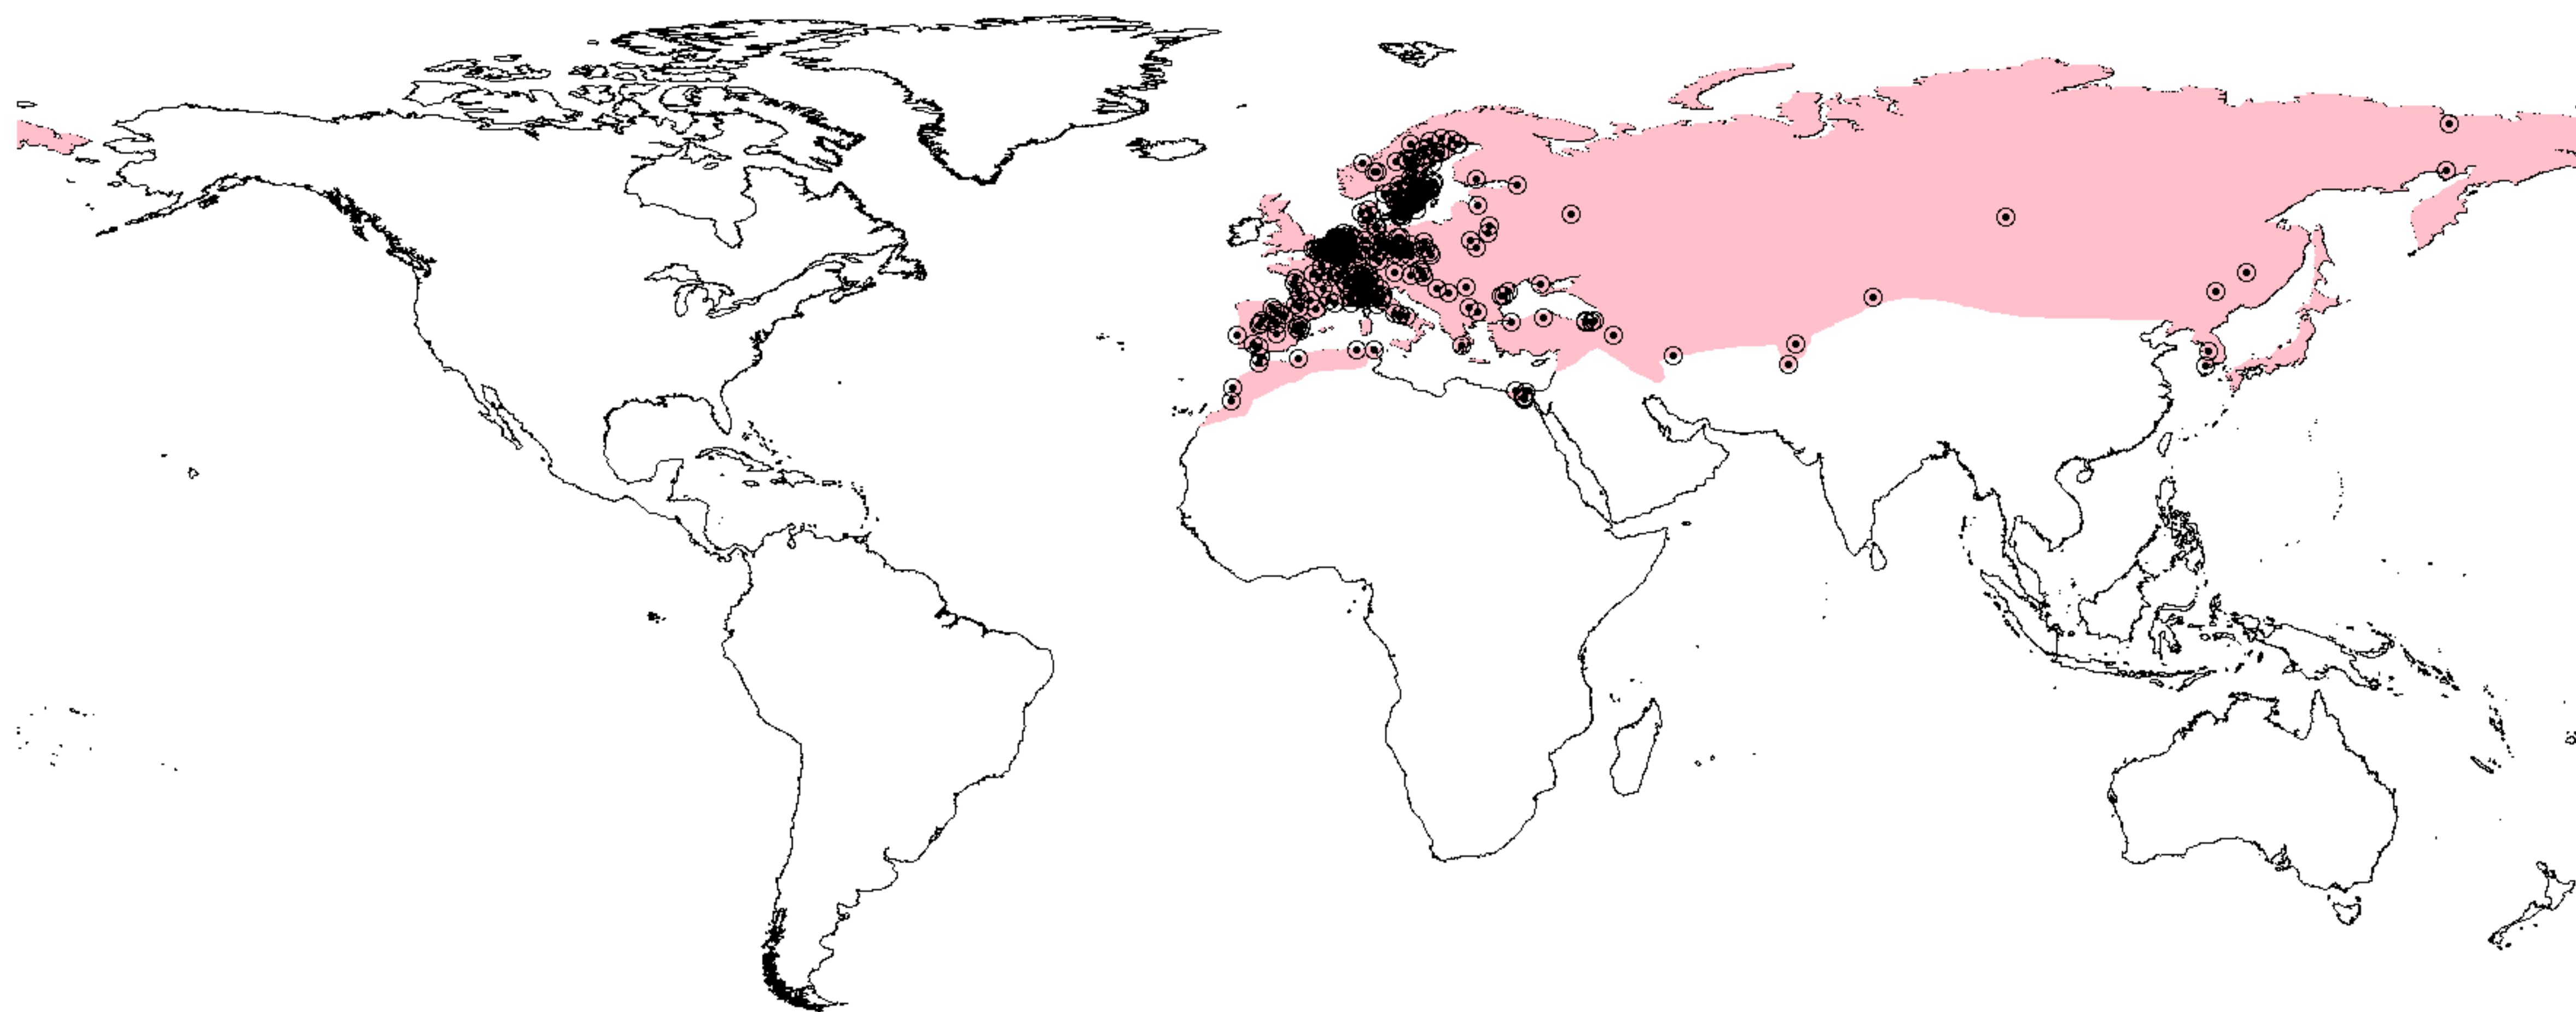

*Mustela nivalis* Palearctic

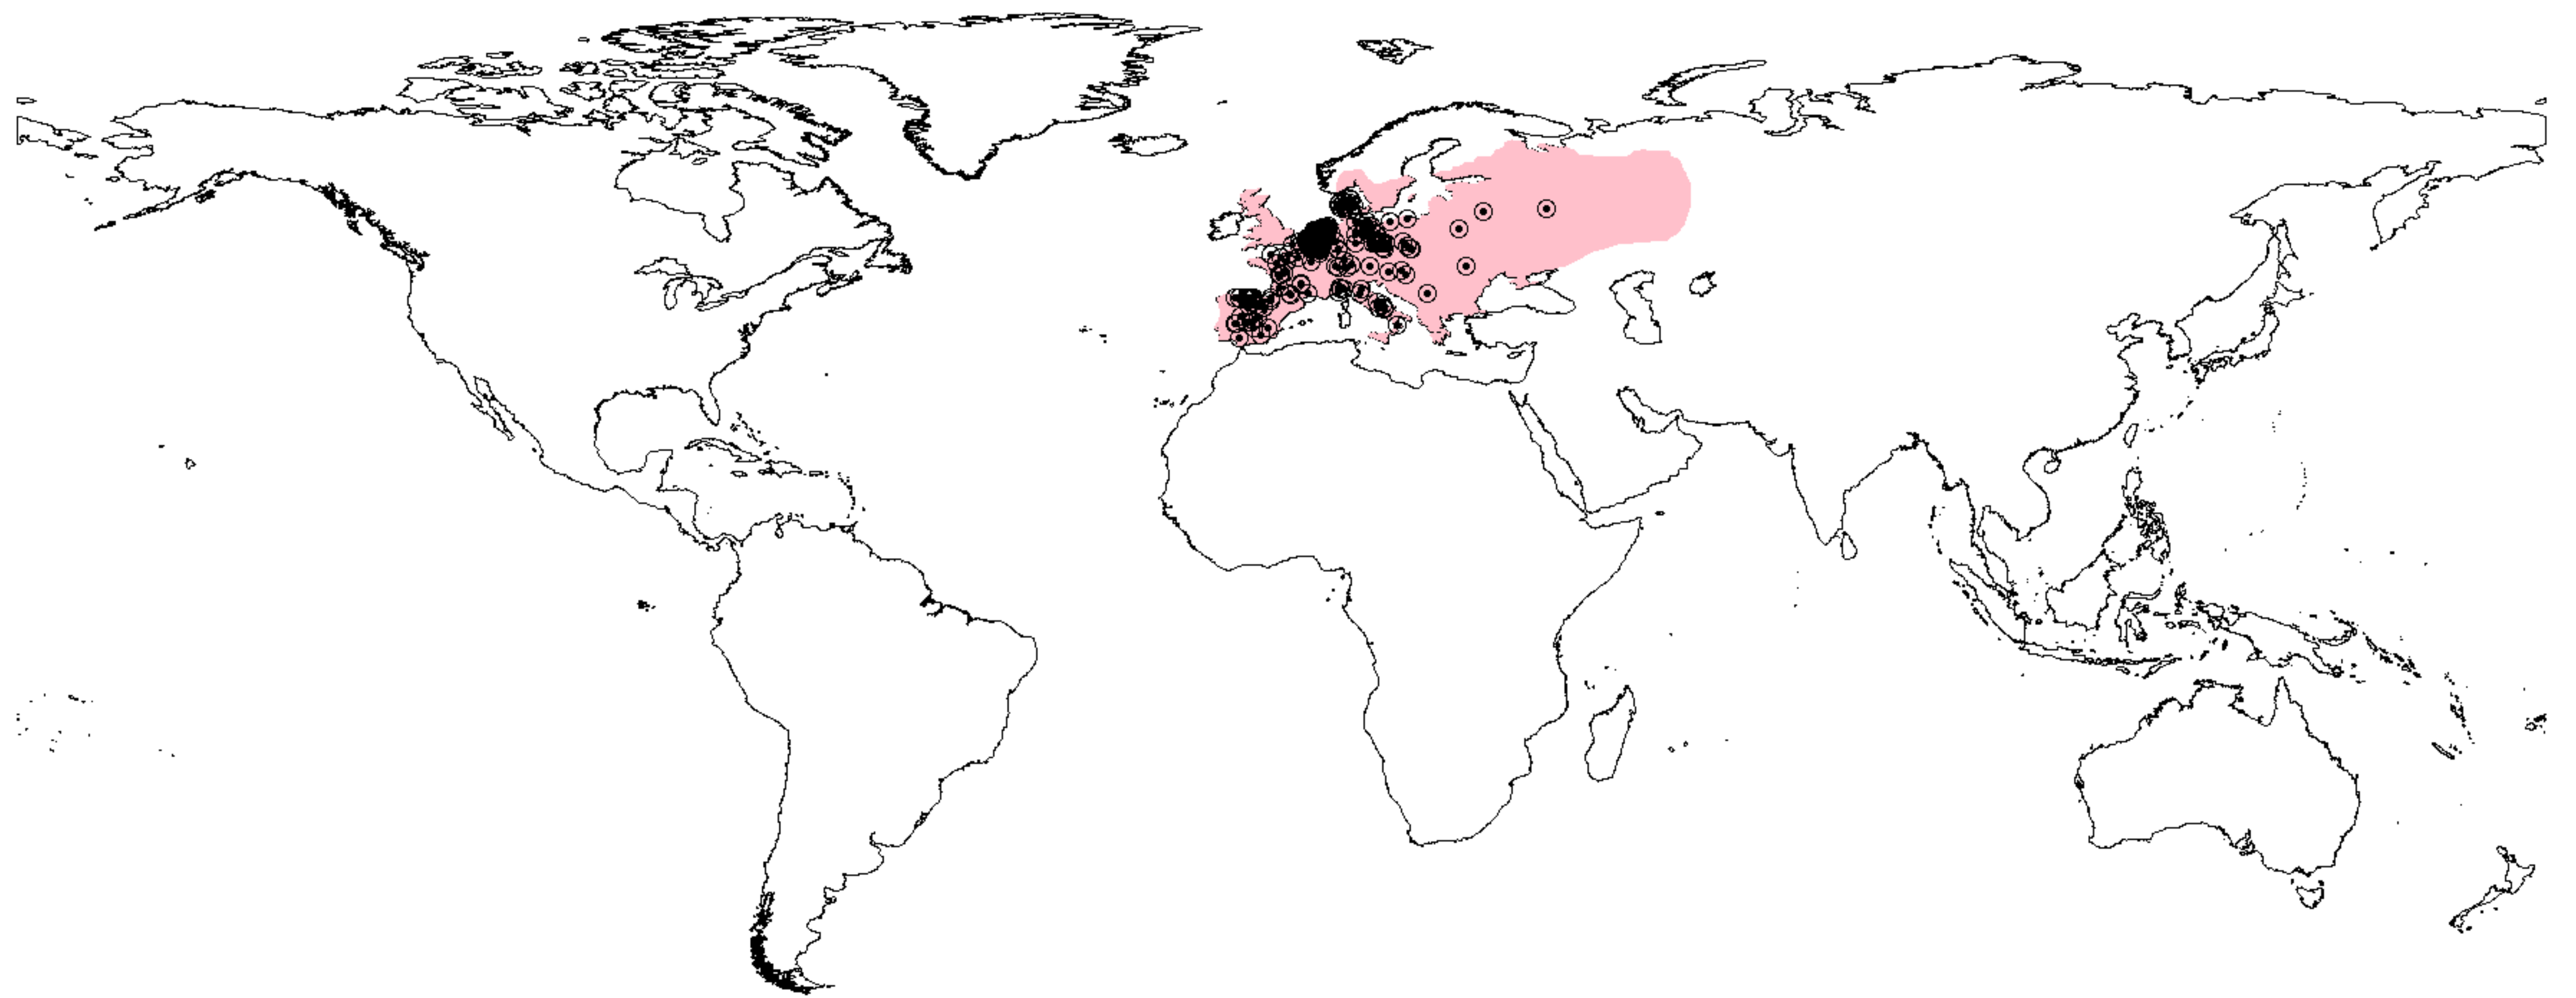

*Mustela putorius*



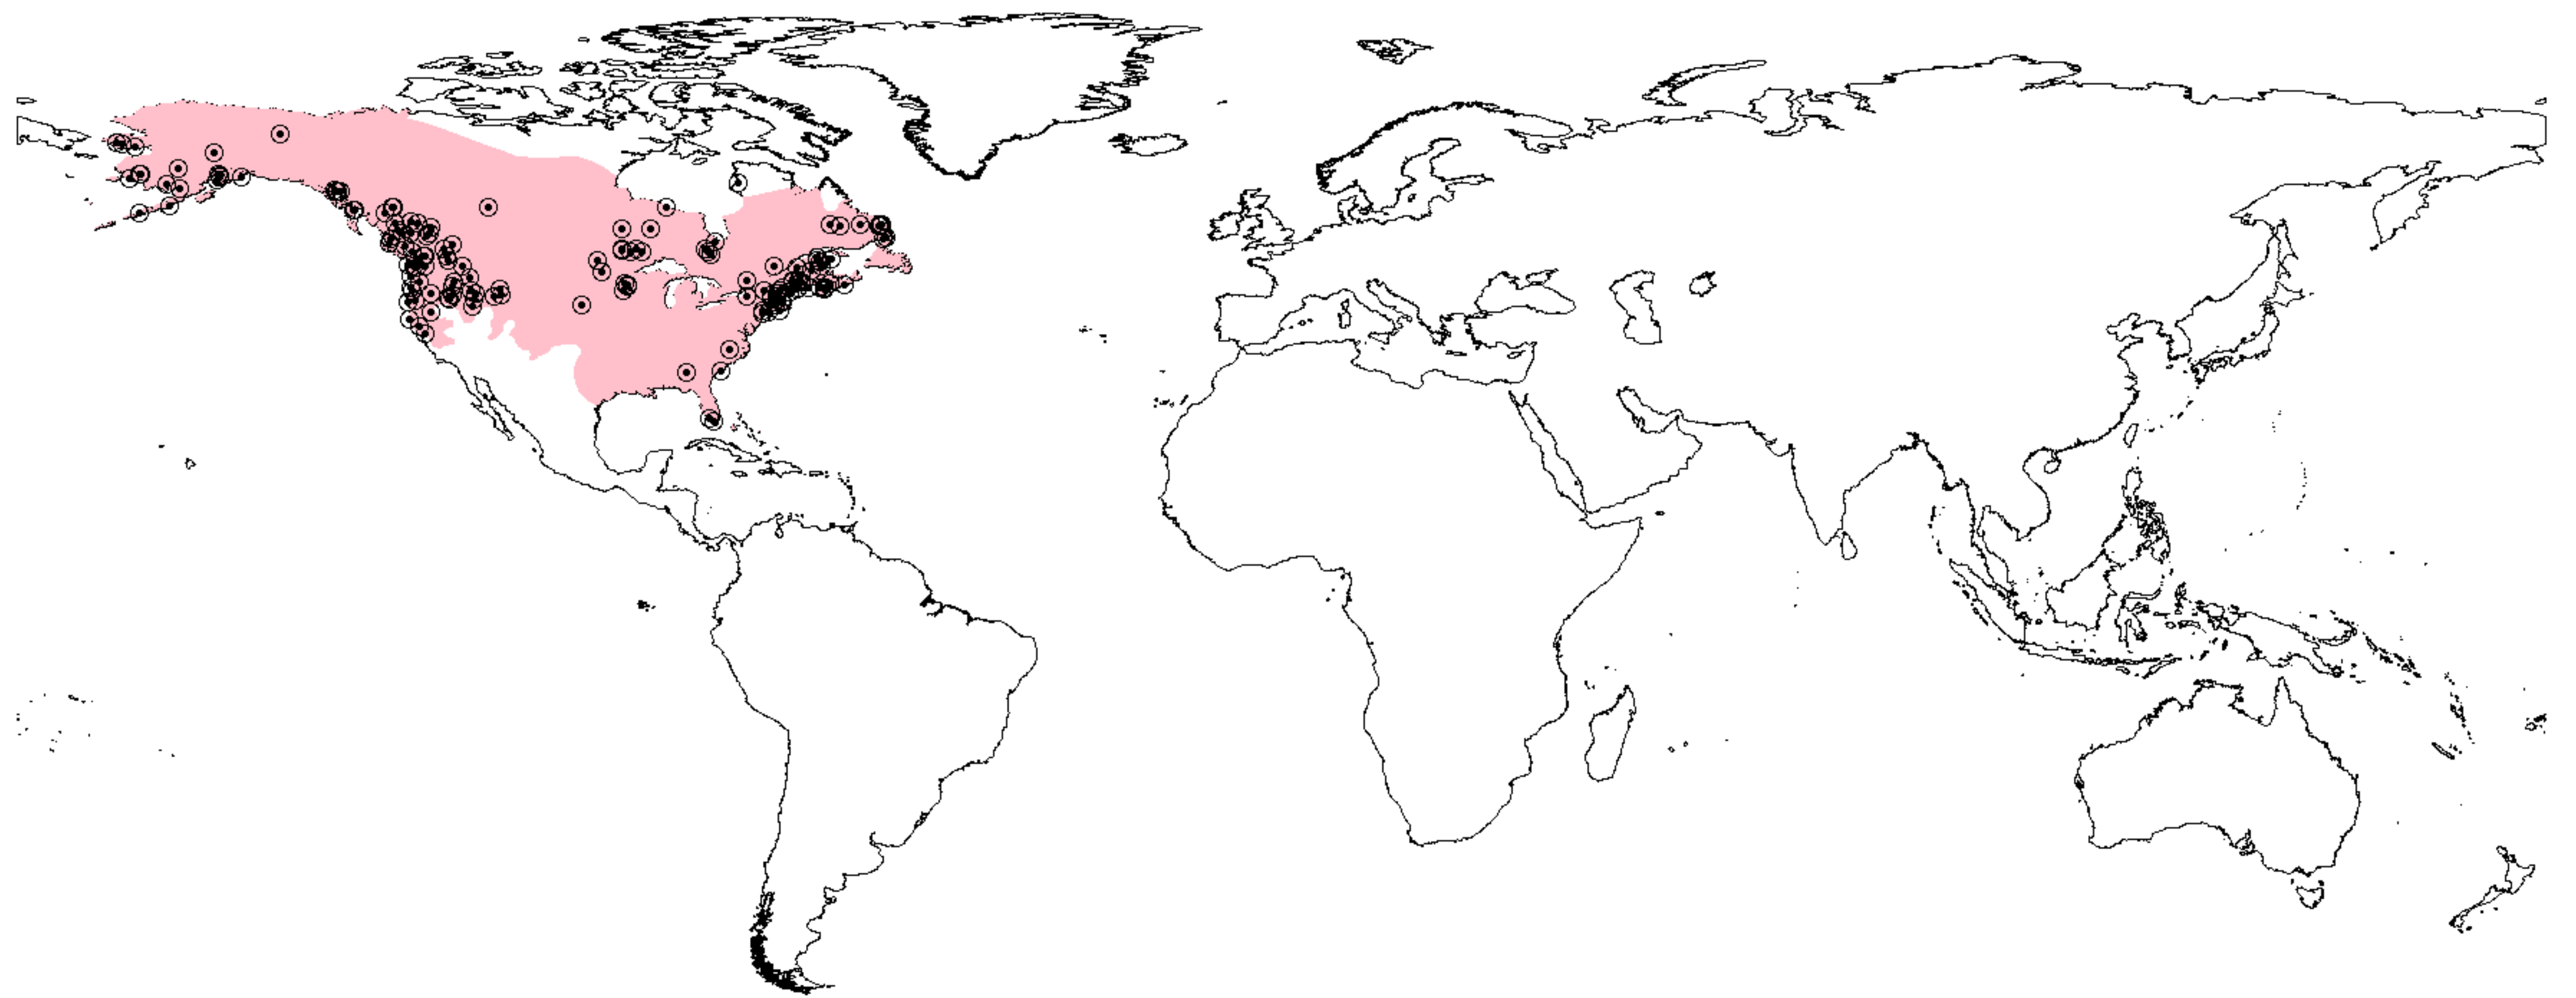

*Mustela vison*

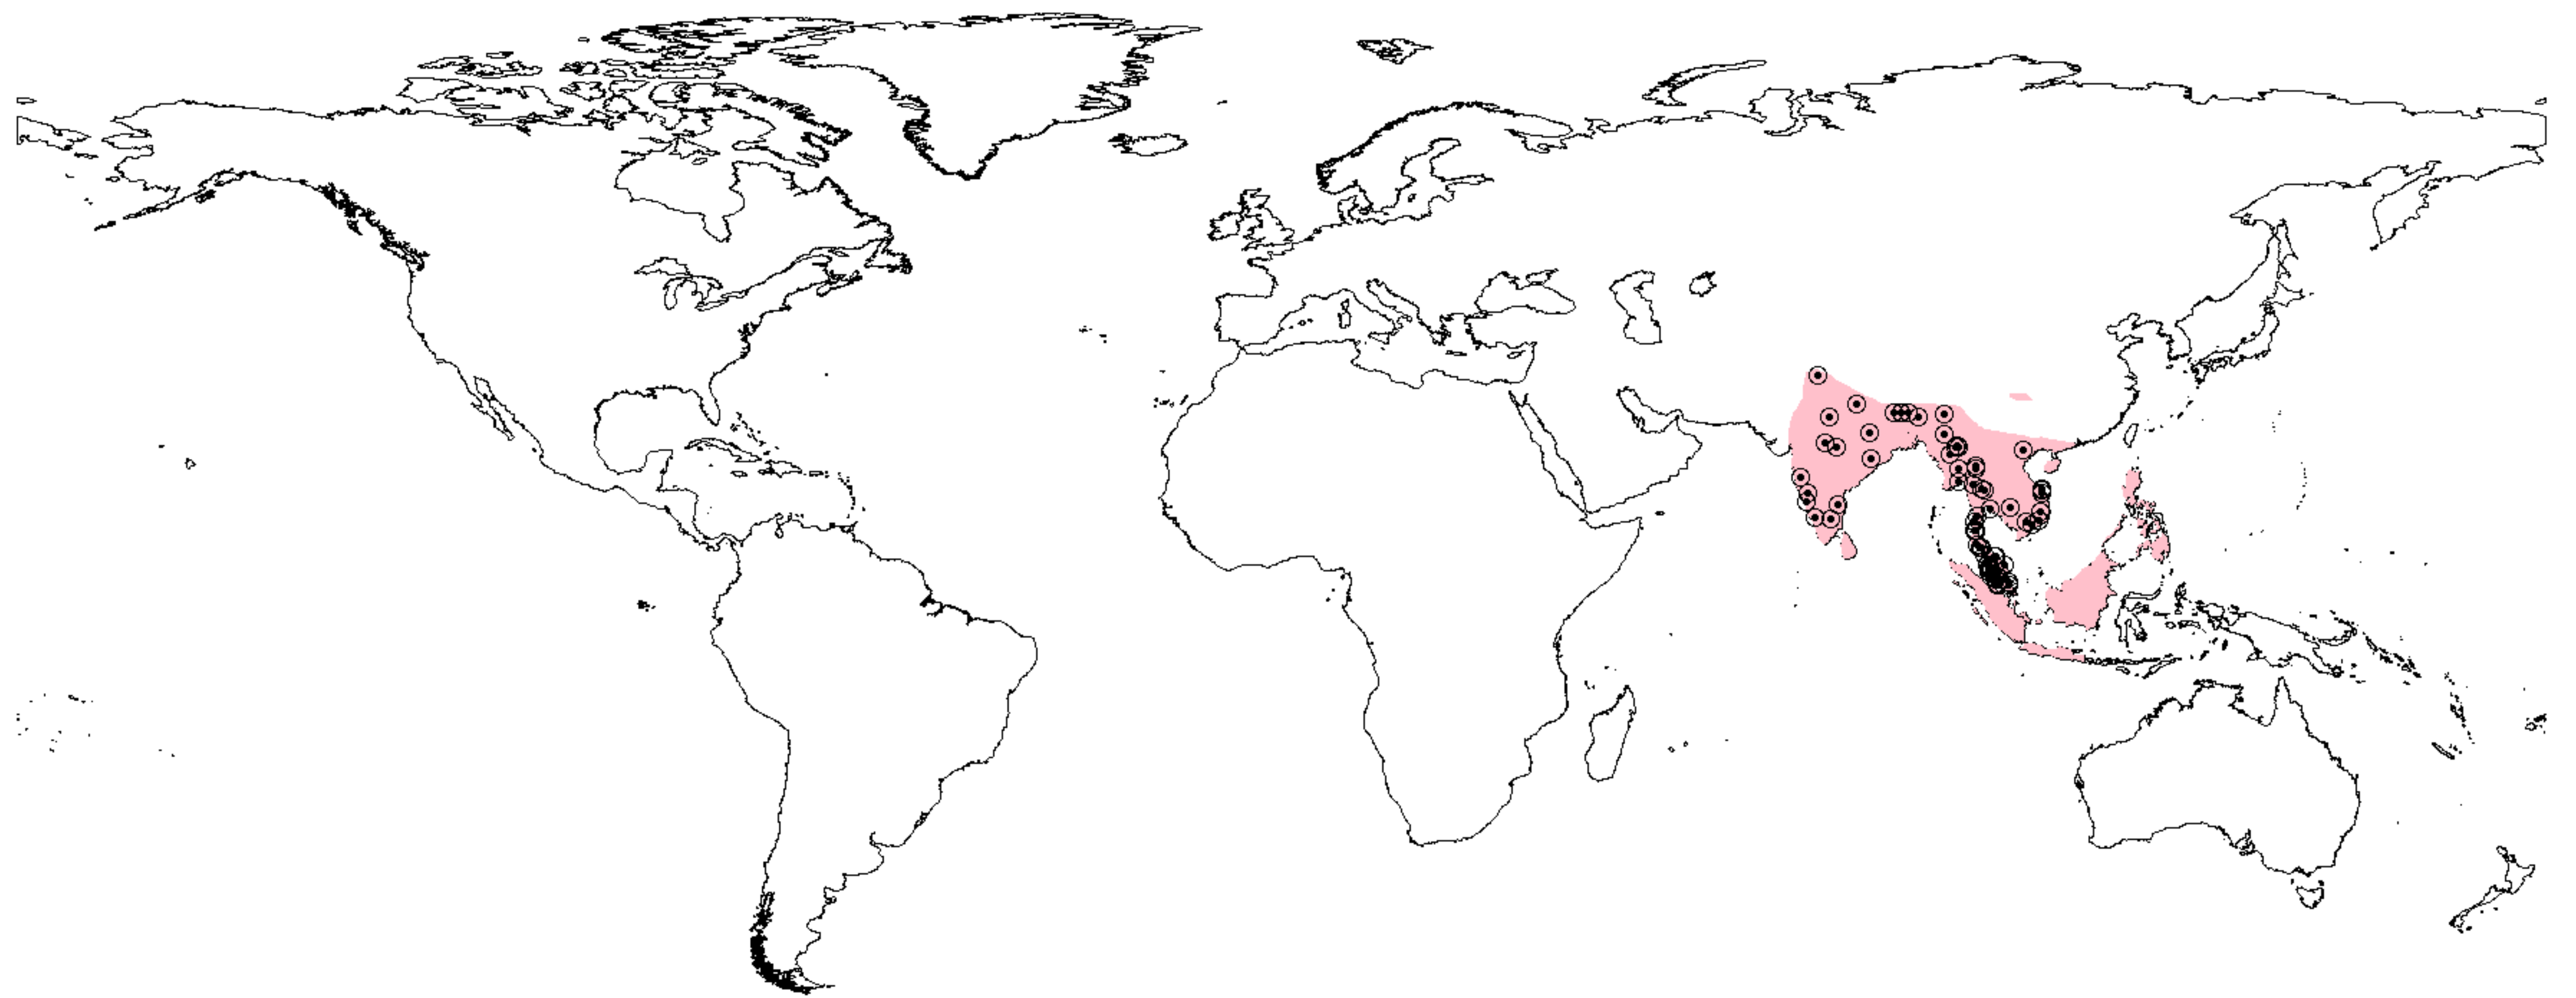

*Paradoxurus hermaphroditus*

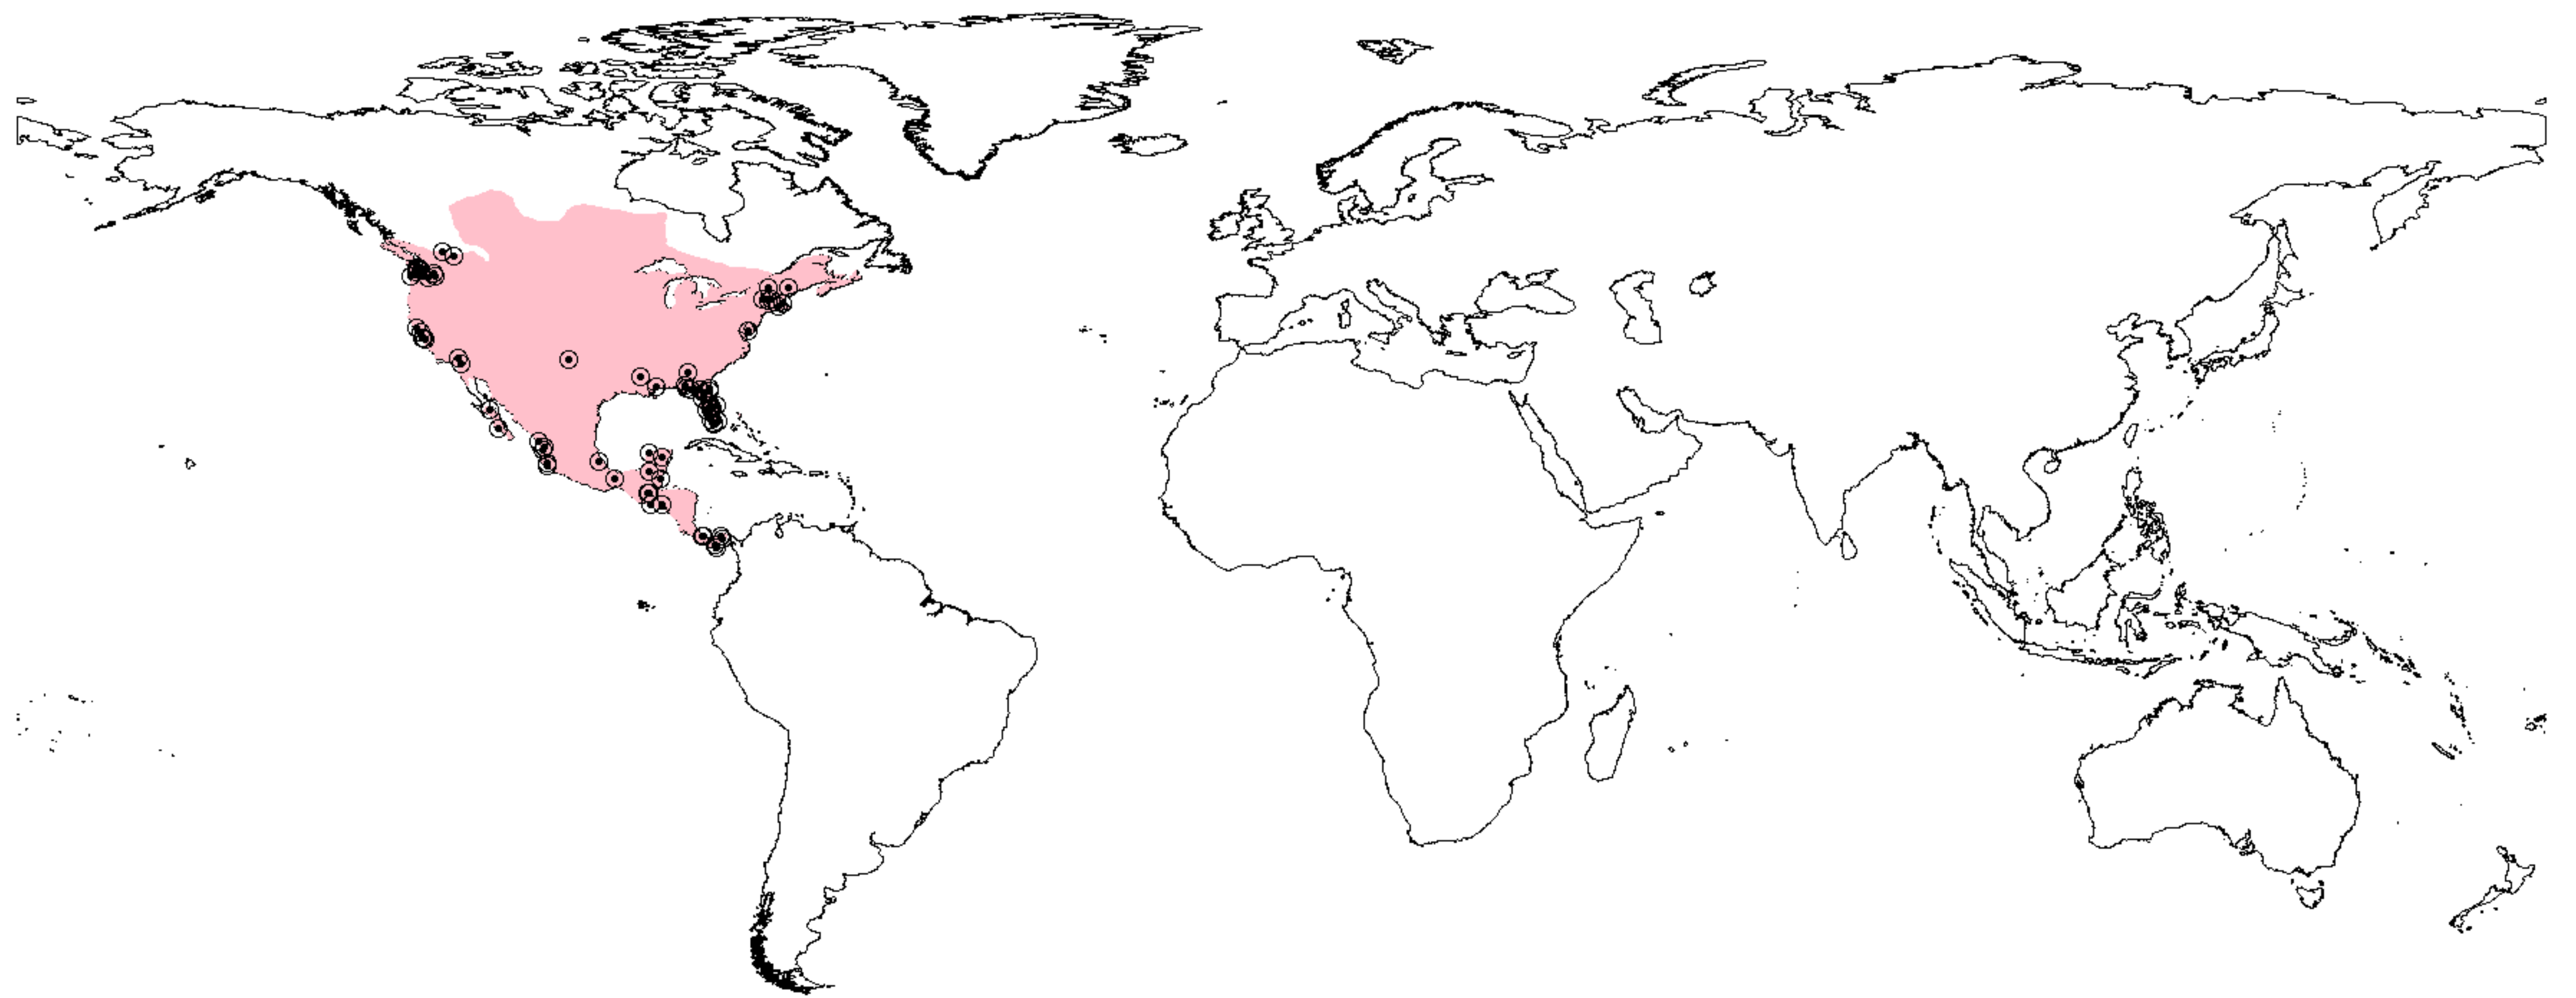

*Procyon lotor*

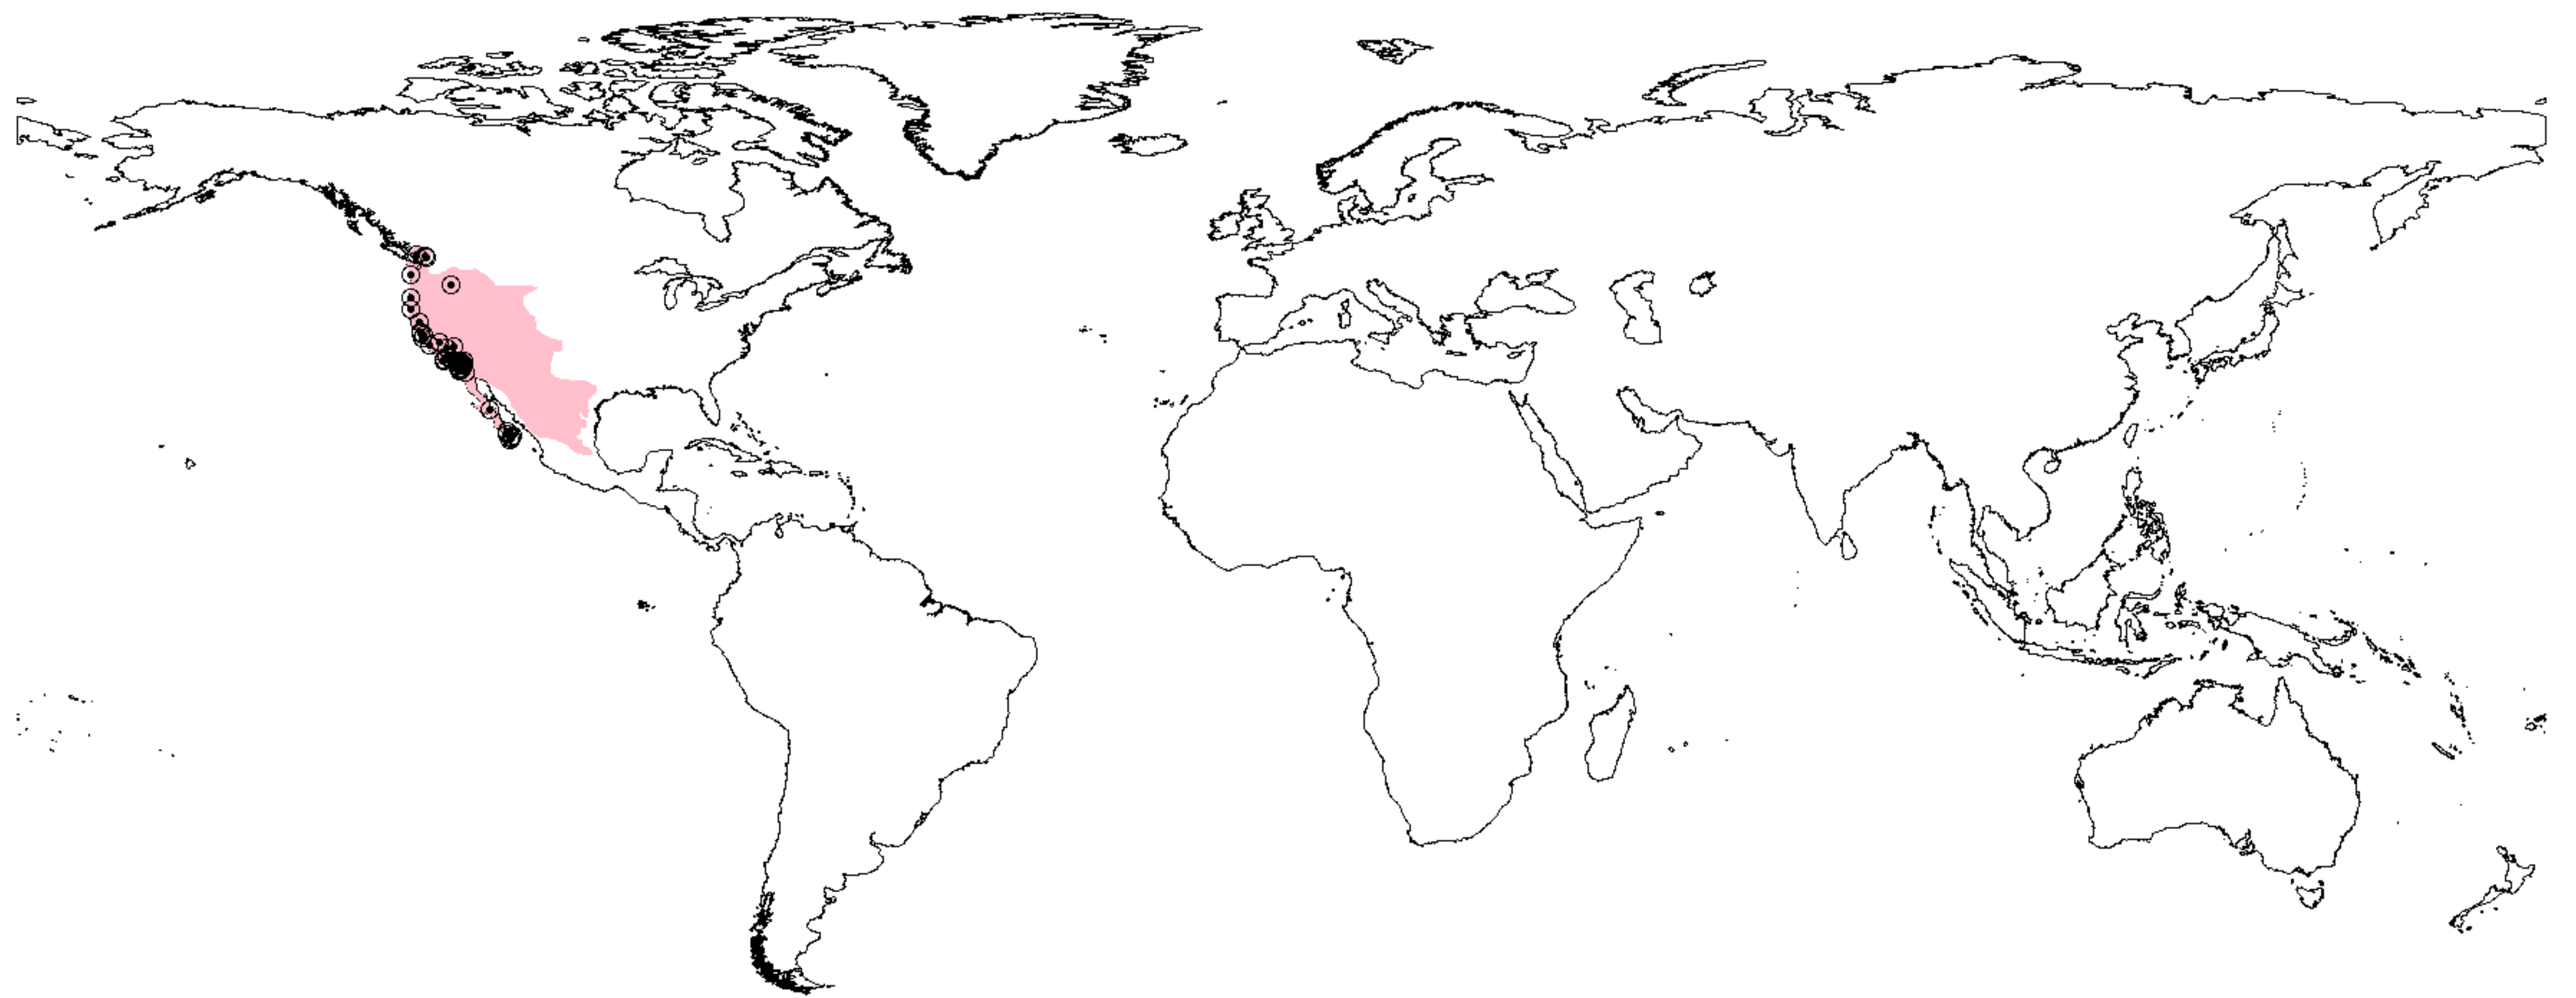

*Spilogale gracilis*



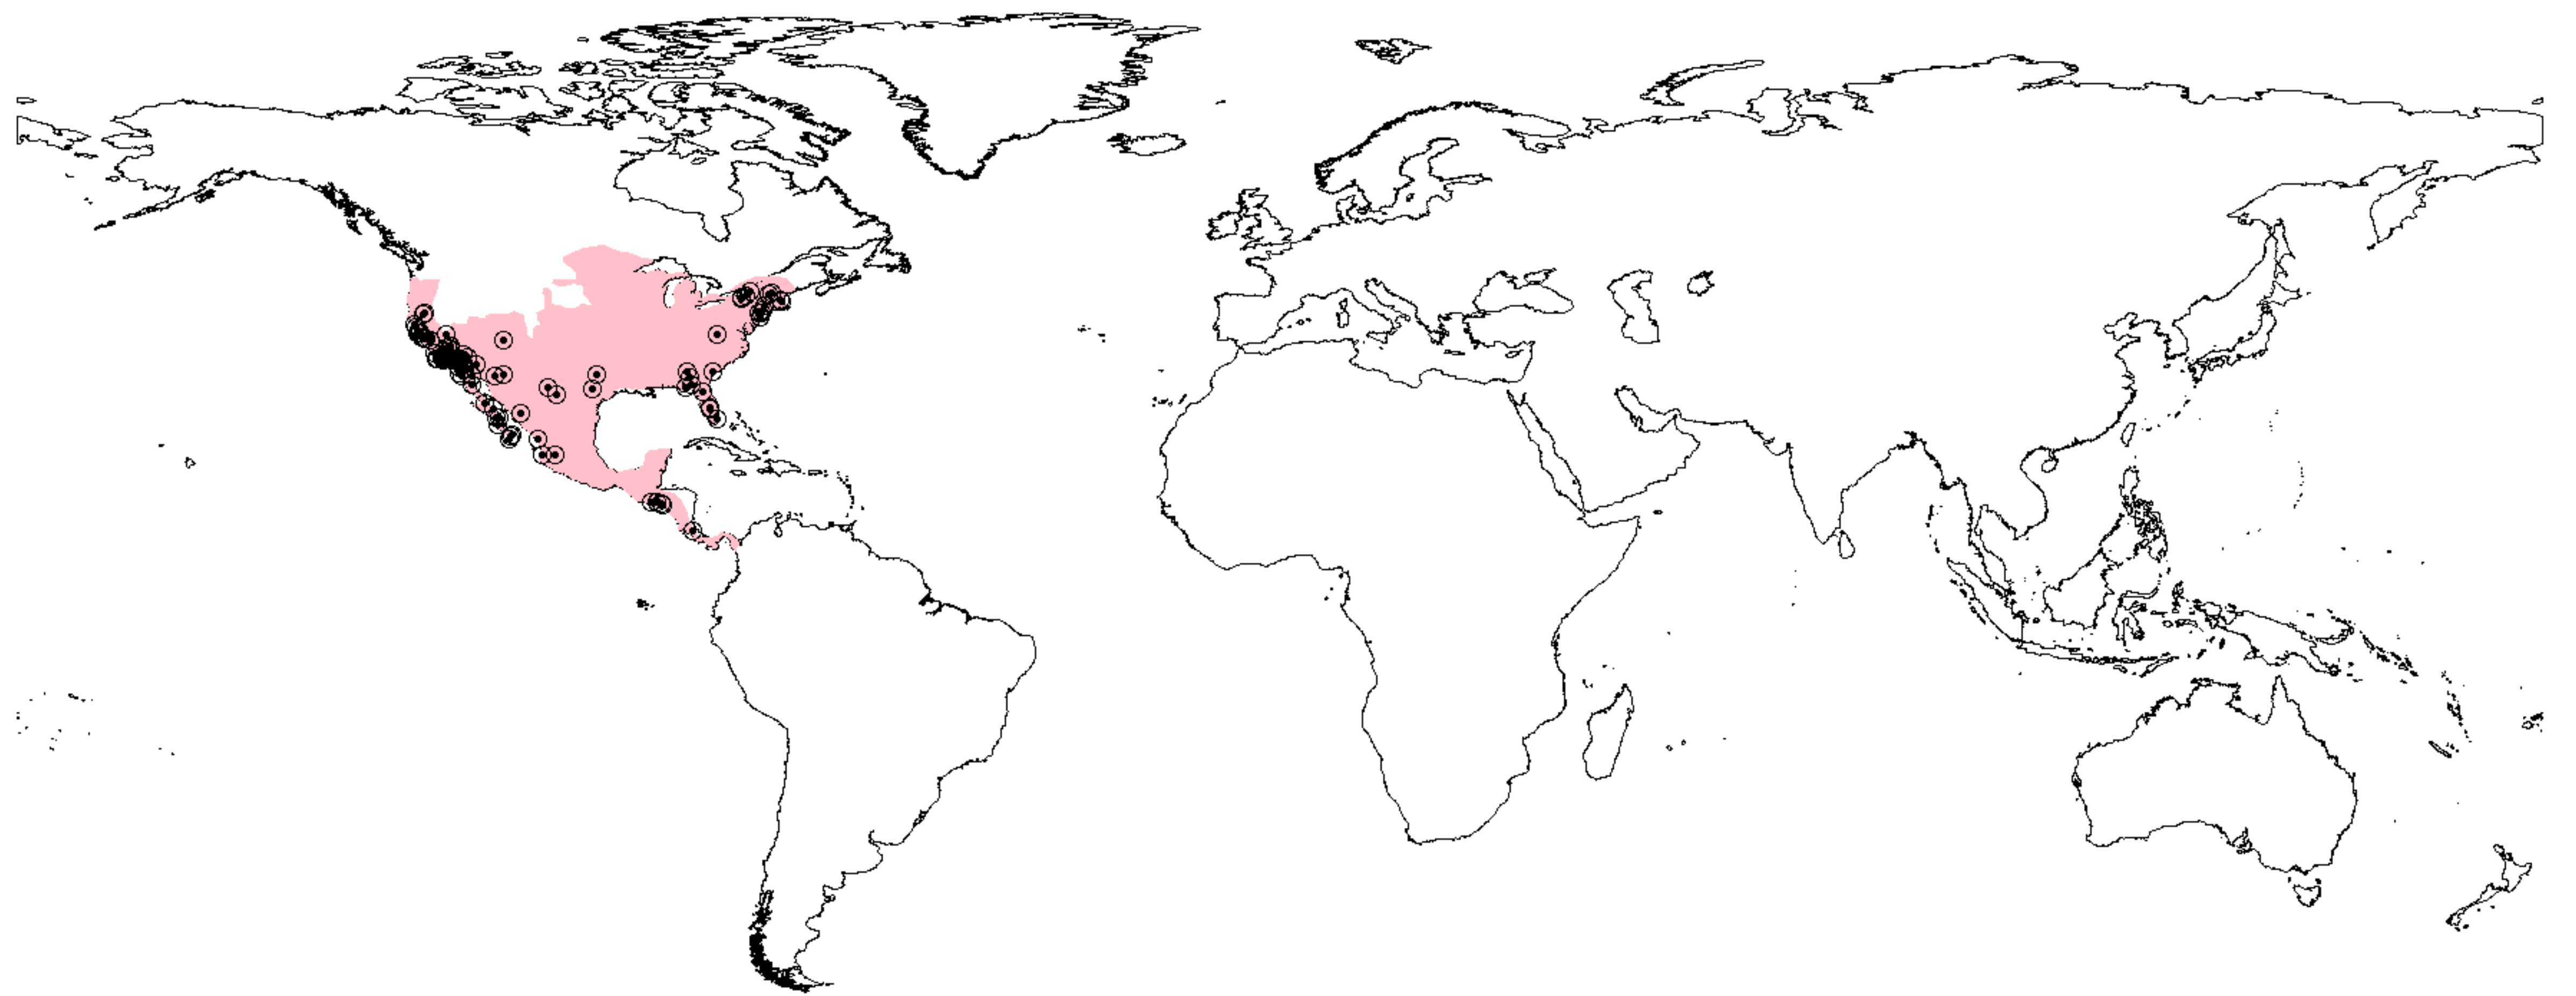

*Urocyon cinereoargenteus*

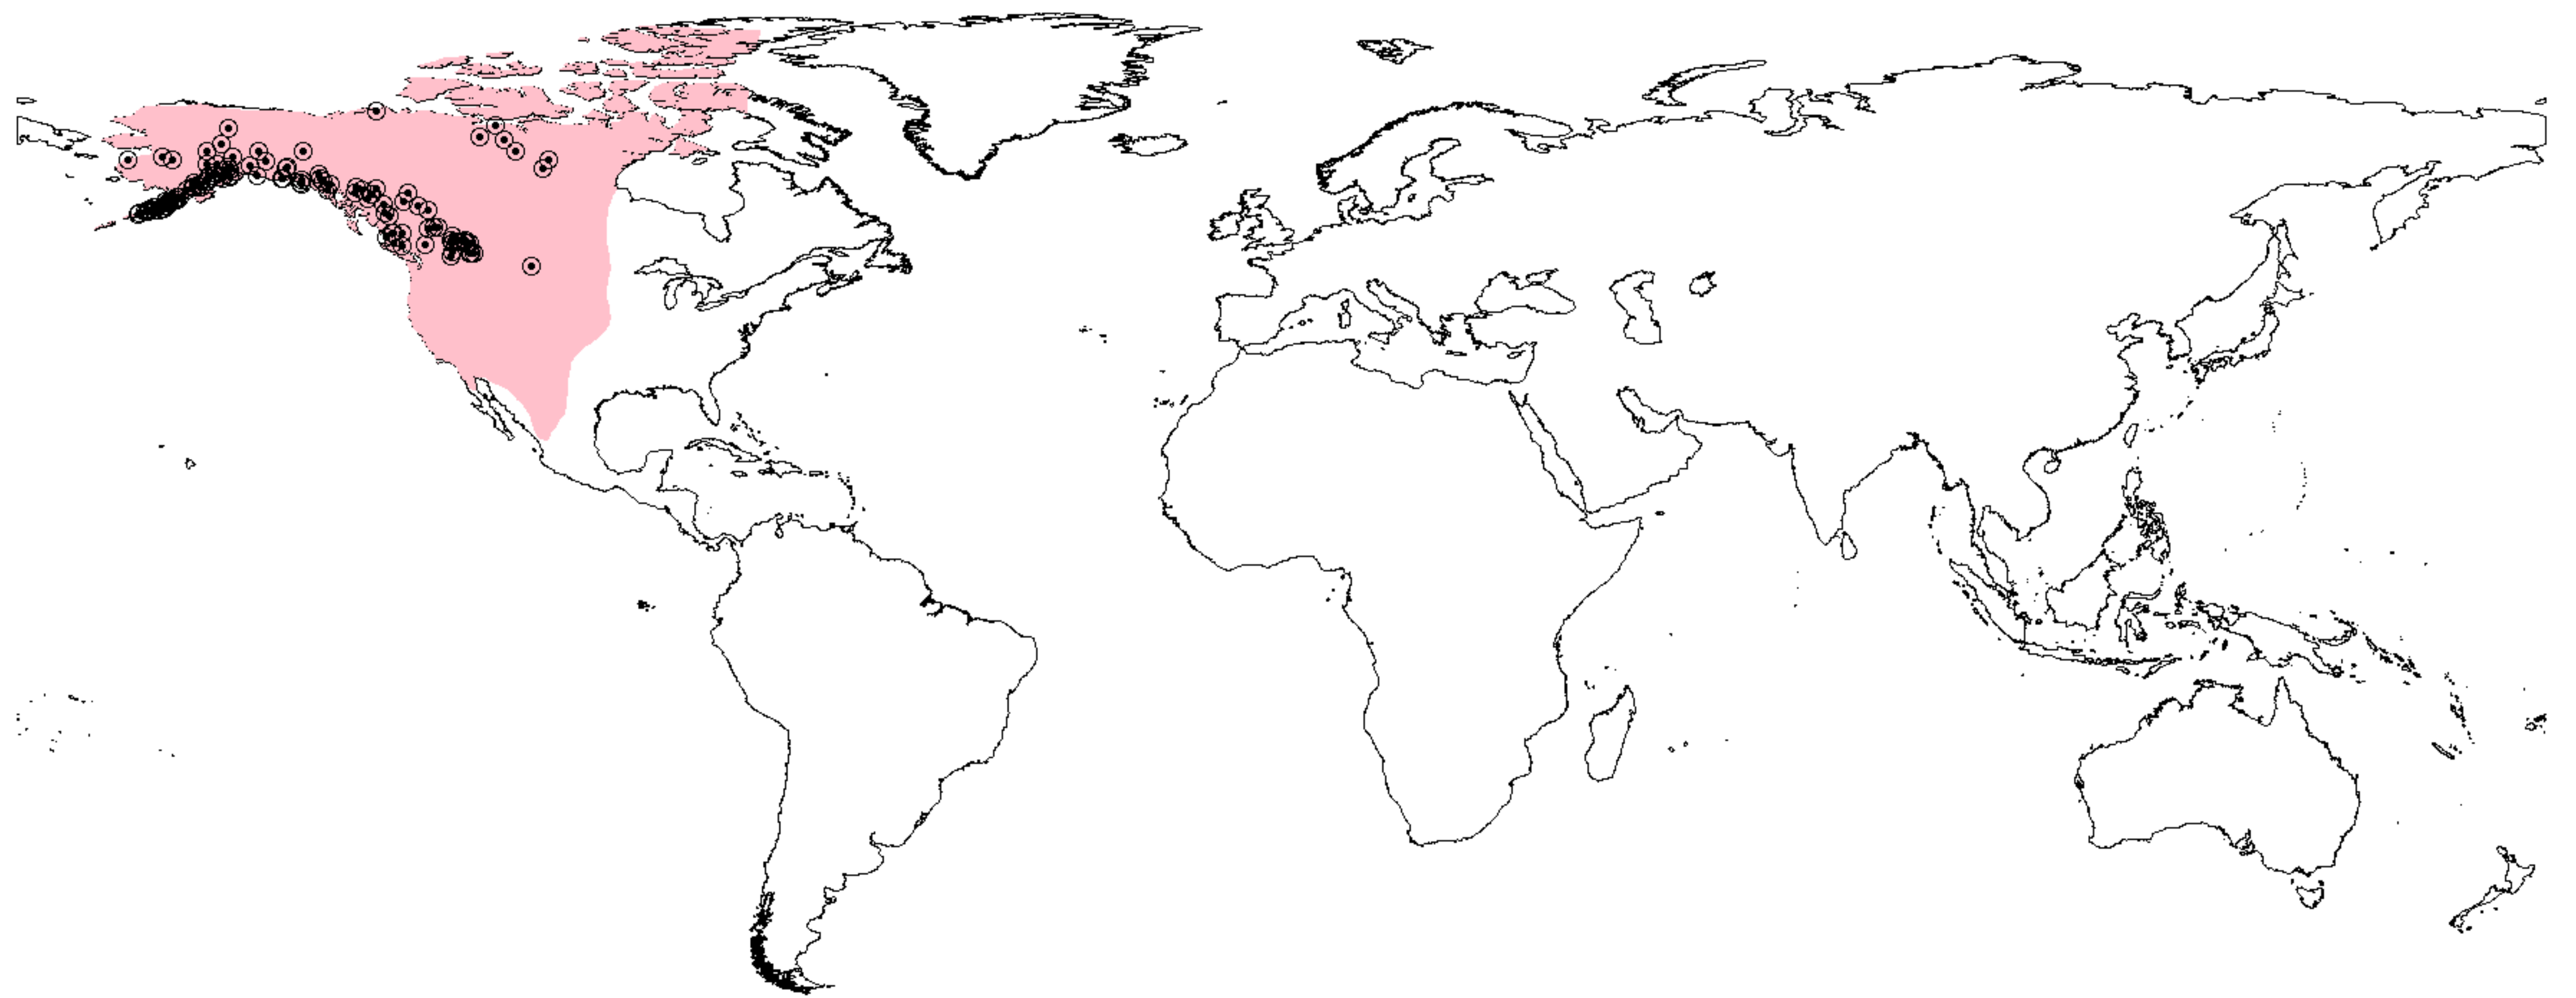

*Ursus arctos*

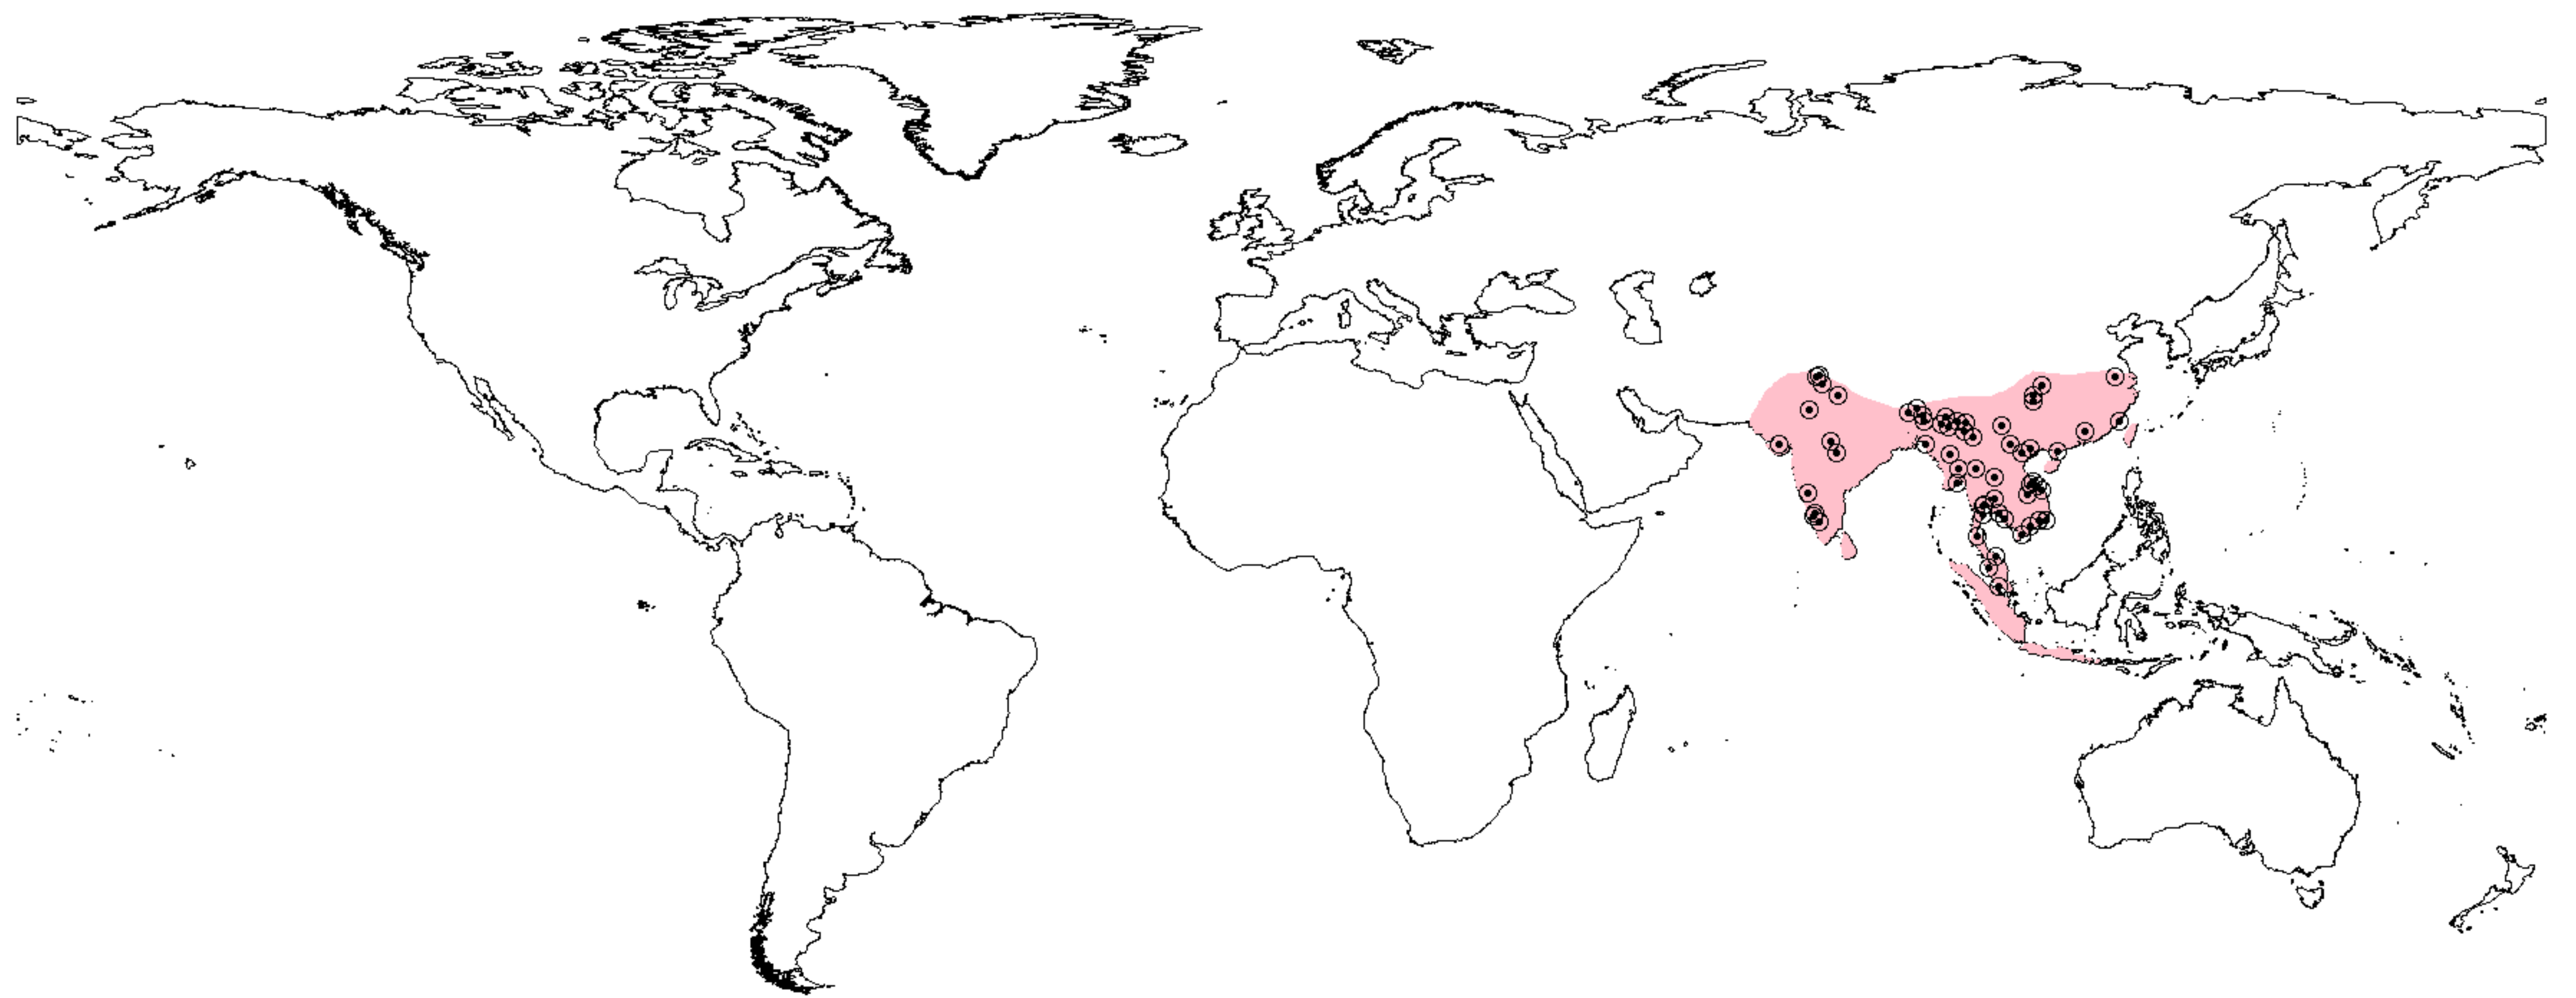

*Viverricula indica*

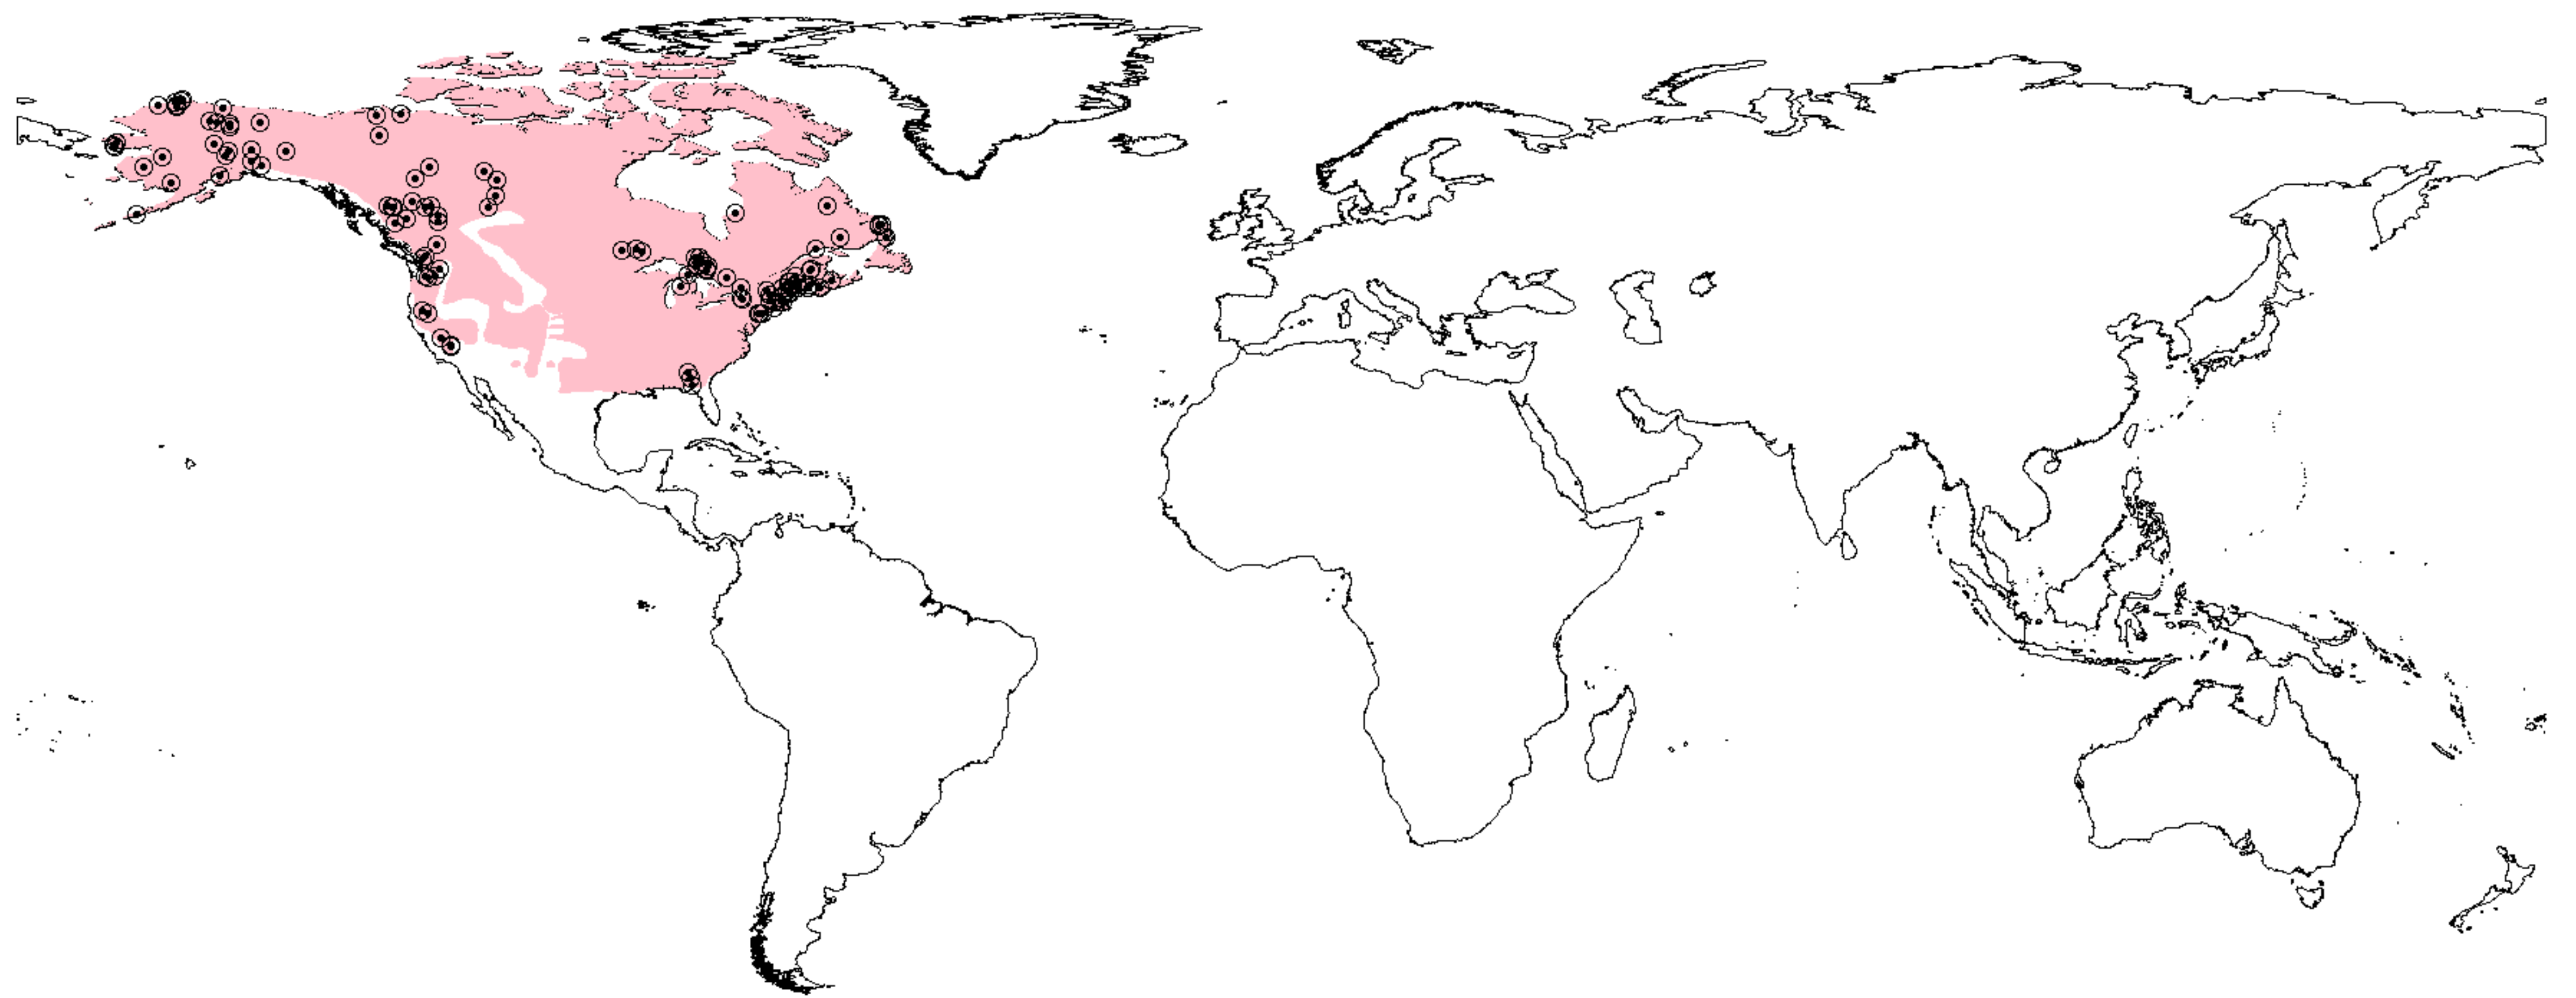

*Vulpes vulpes* Nearctic



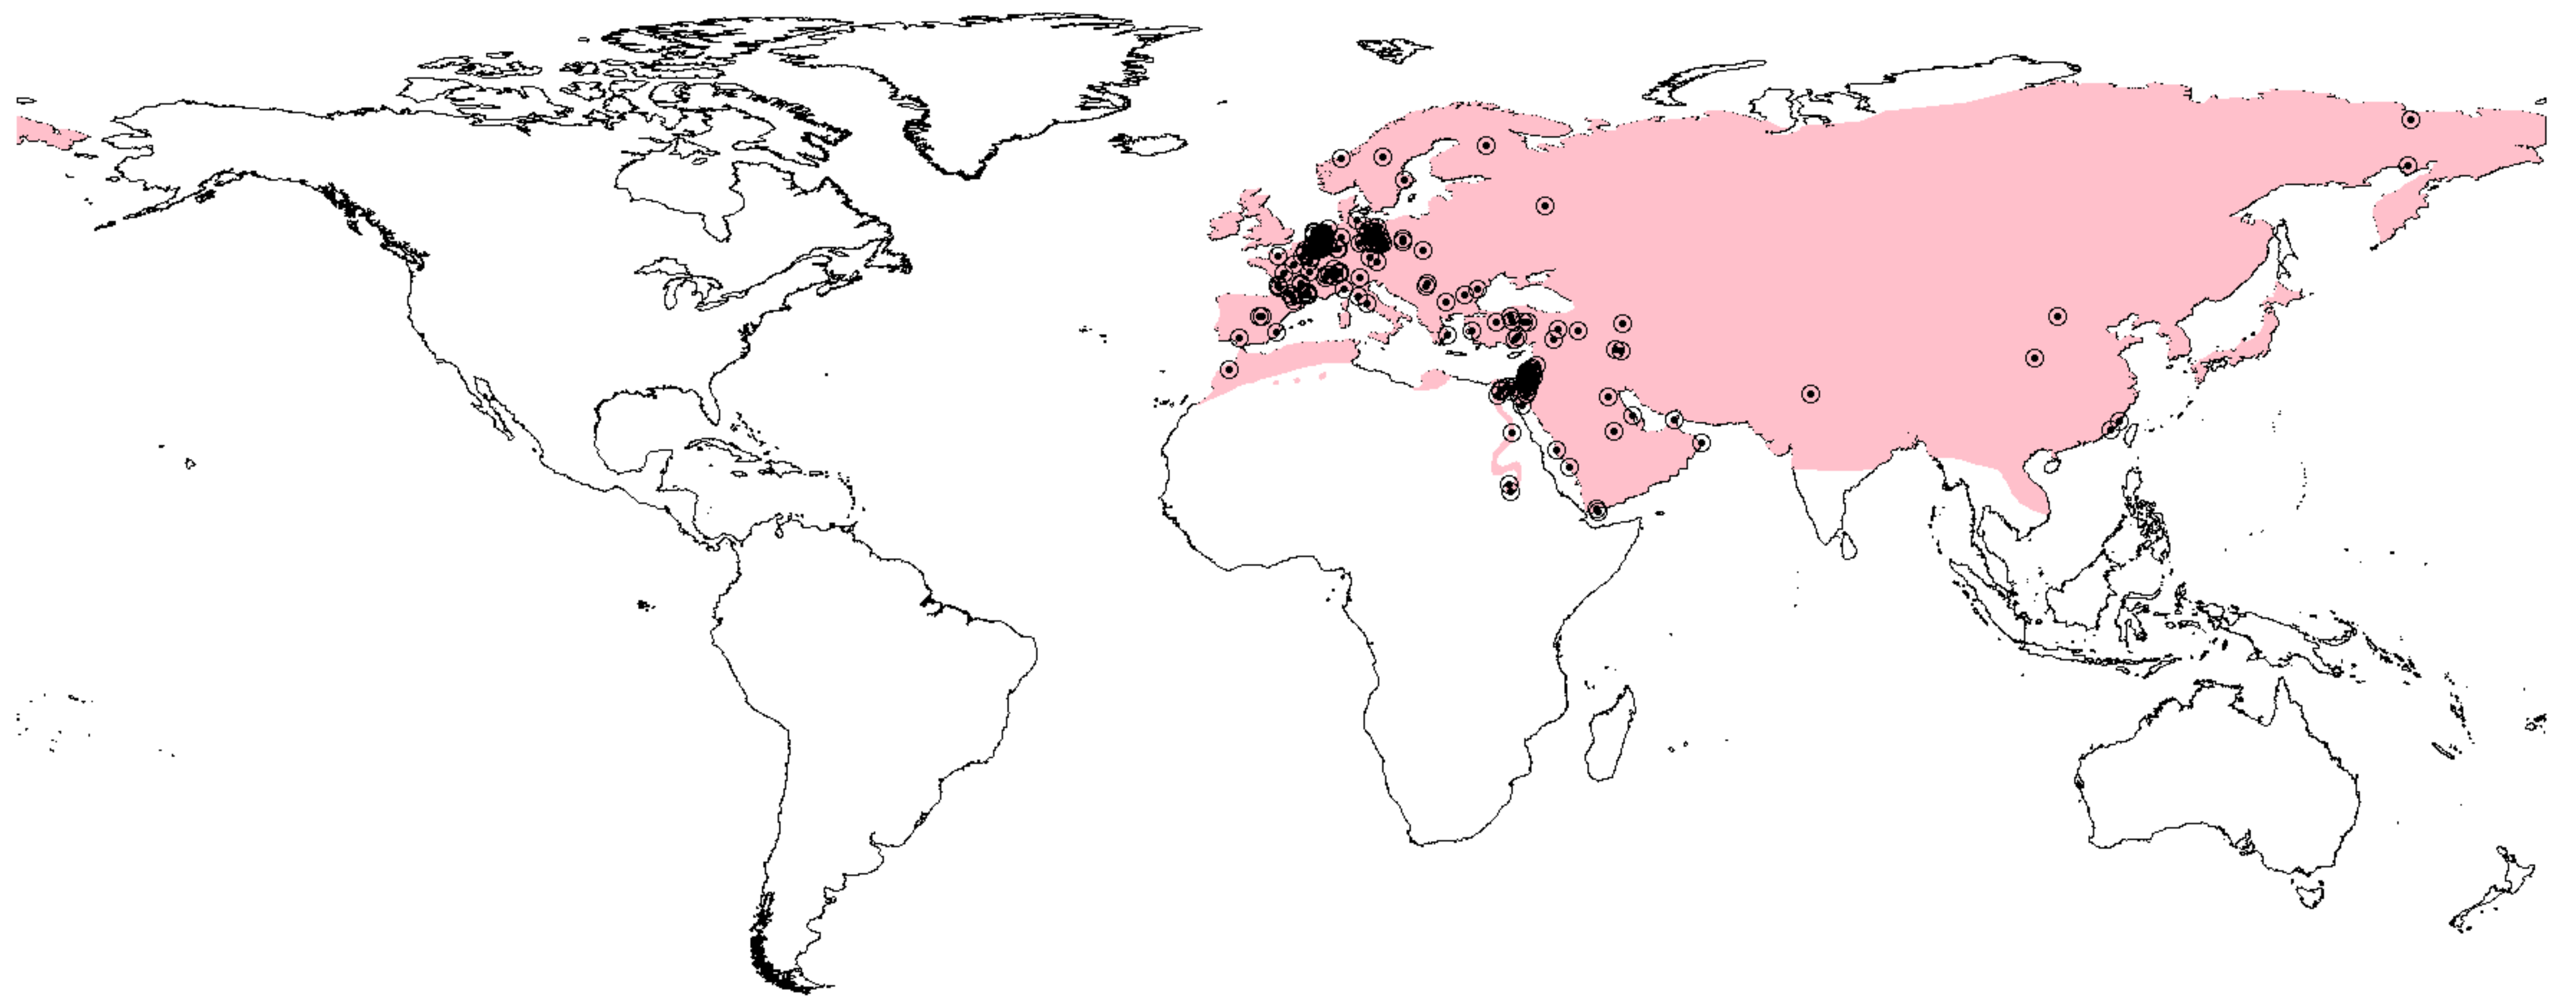

*Vulpes vulpes* Palearctic

Marginal GAM Surface for CBL in male *Alopes lagopus*

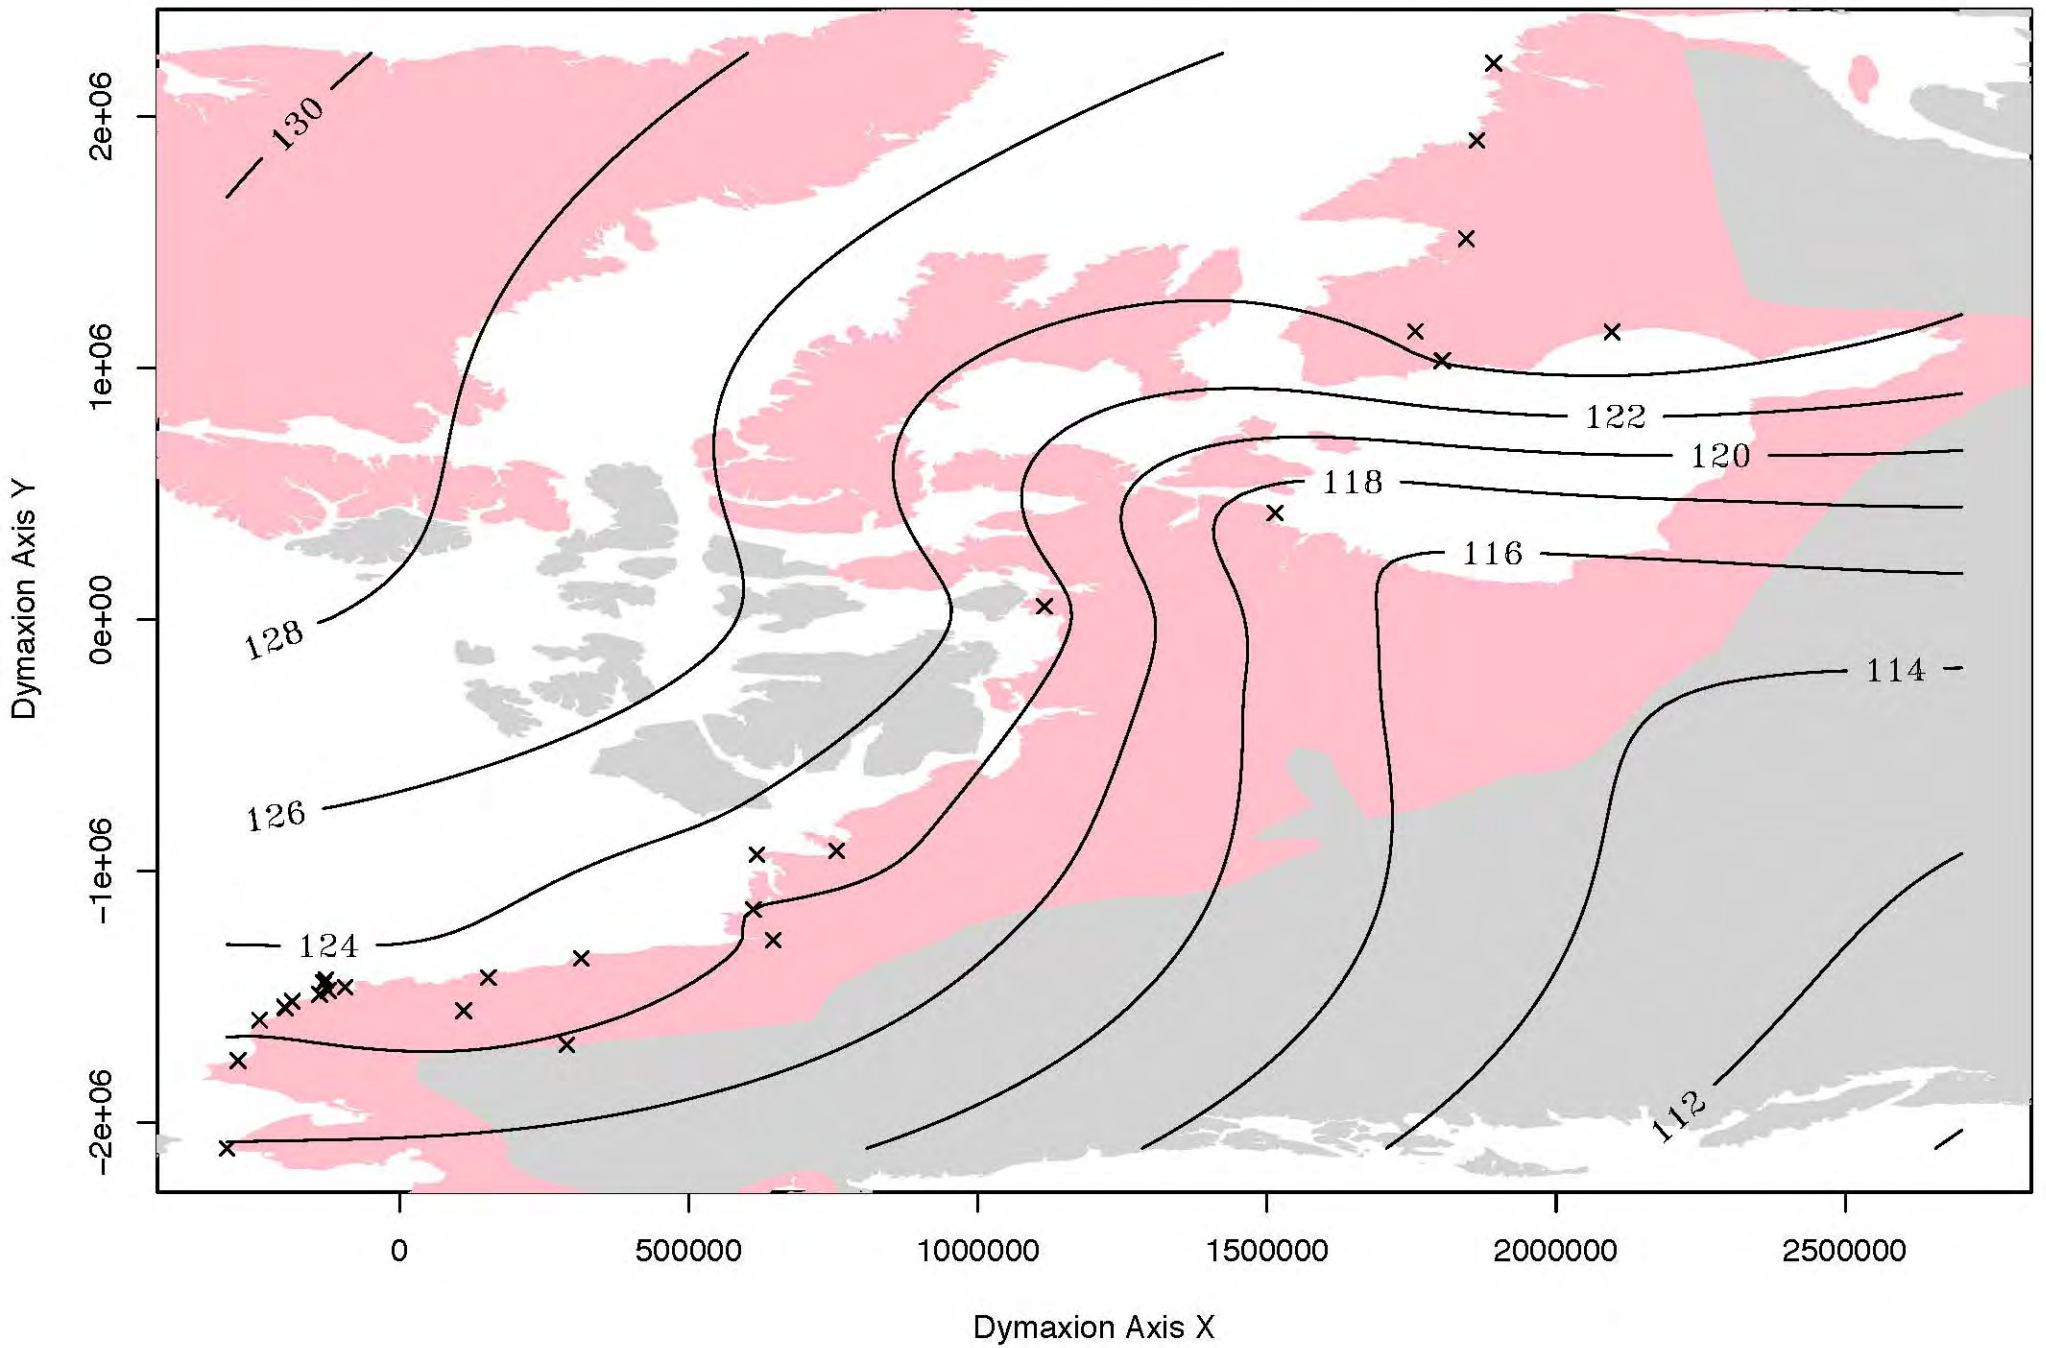

Marginal GAM Surface for CBL in female *Alopes lagopus*

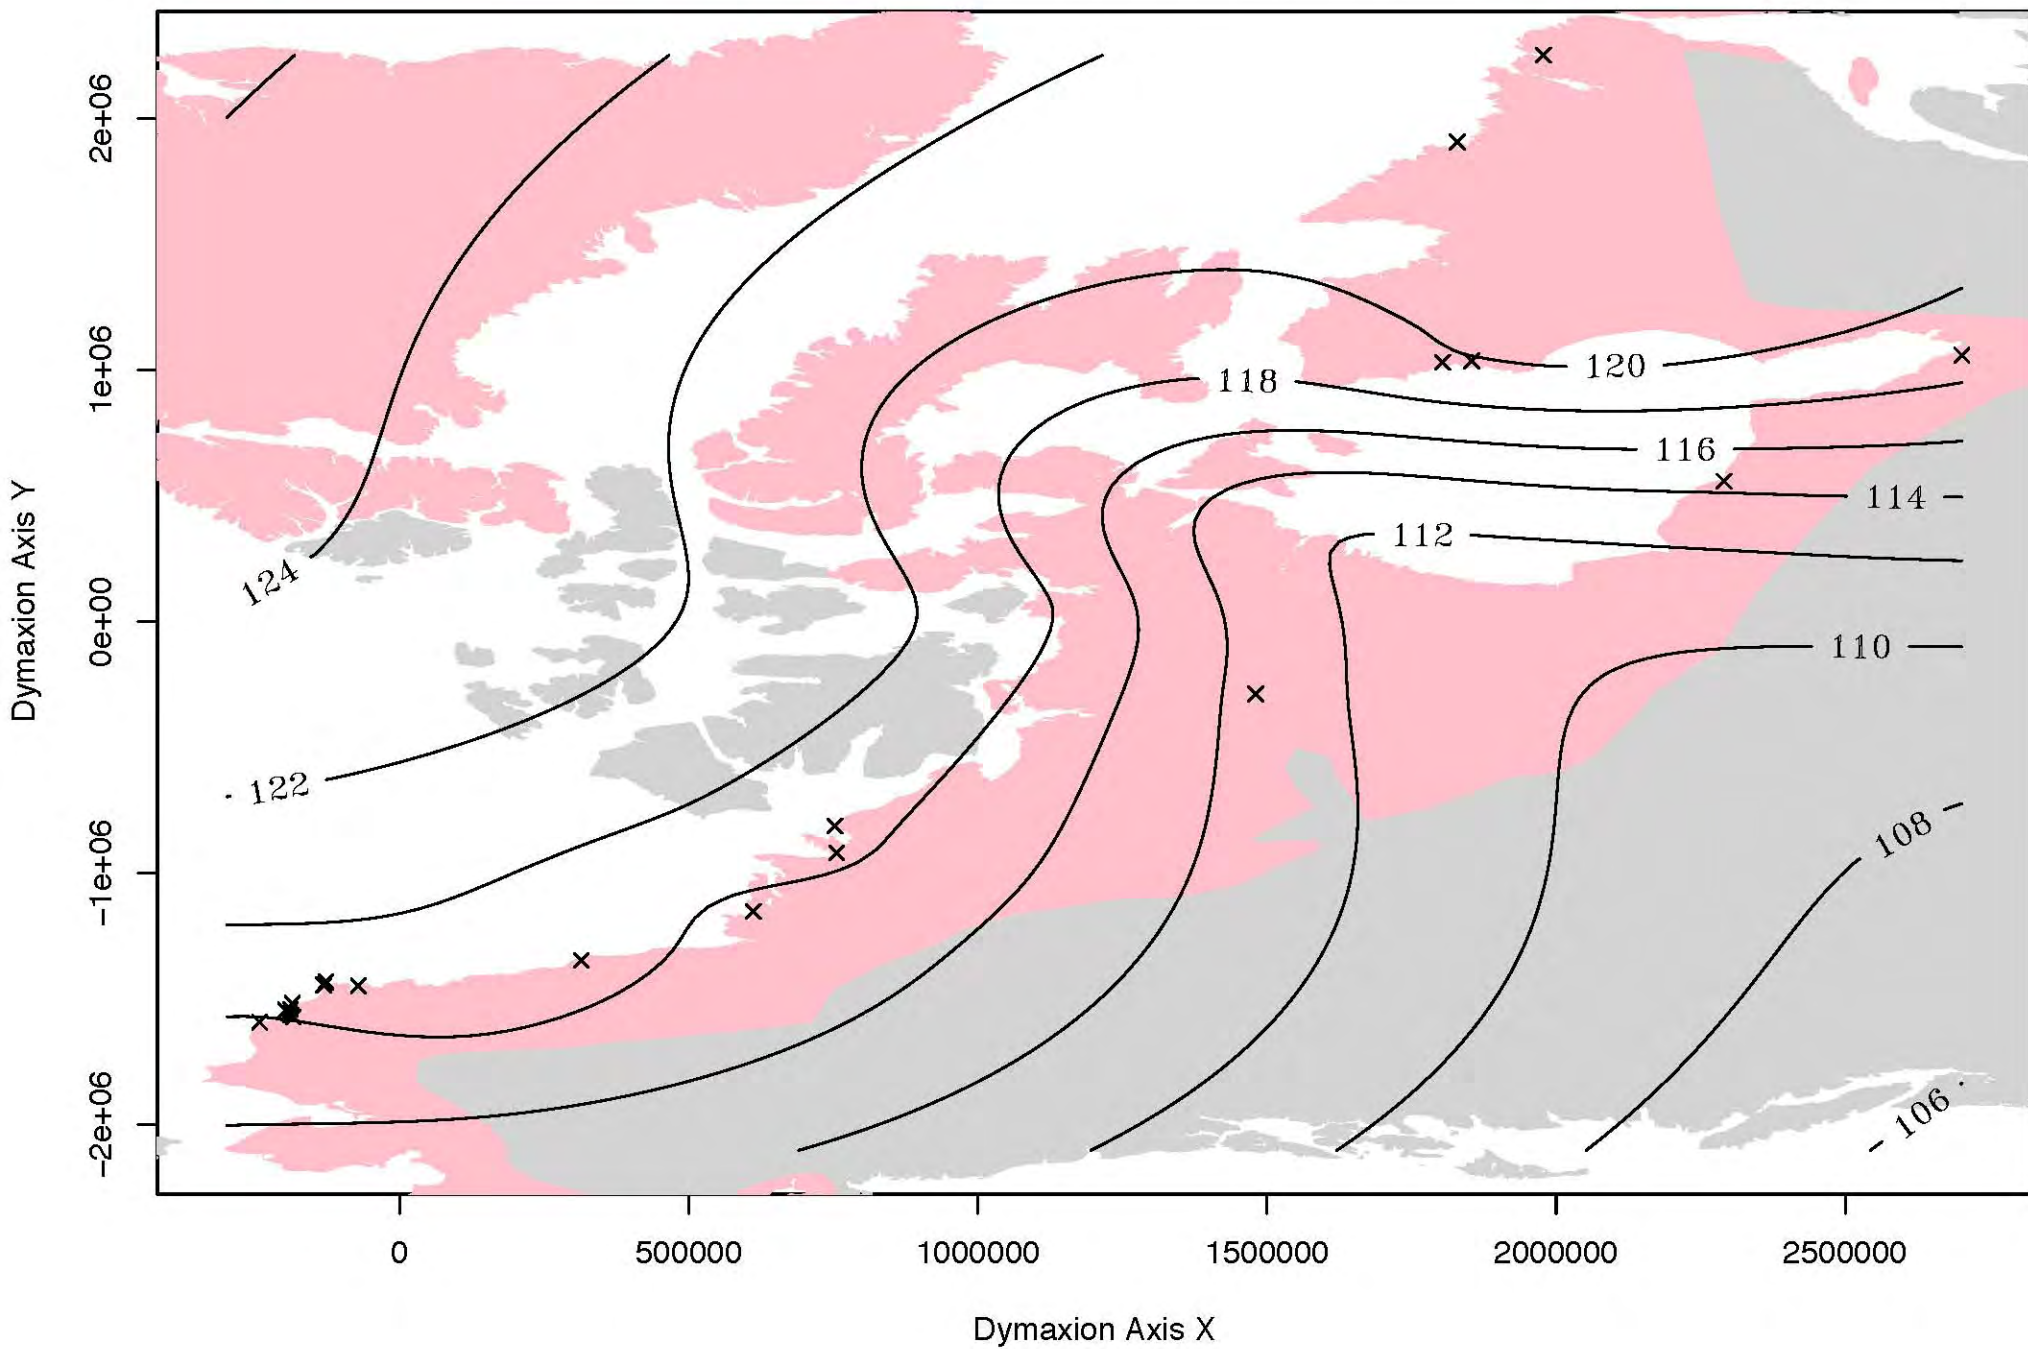



# Marginal GAM Surface for CBL in male *Canis aureus*

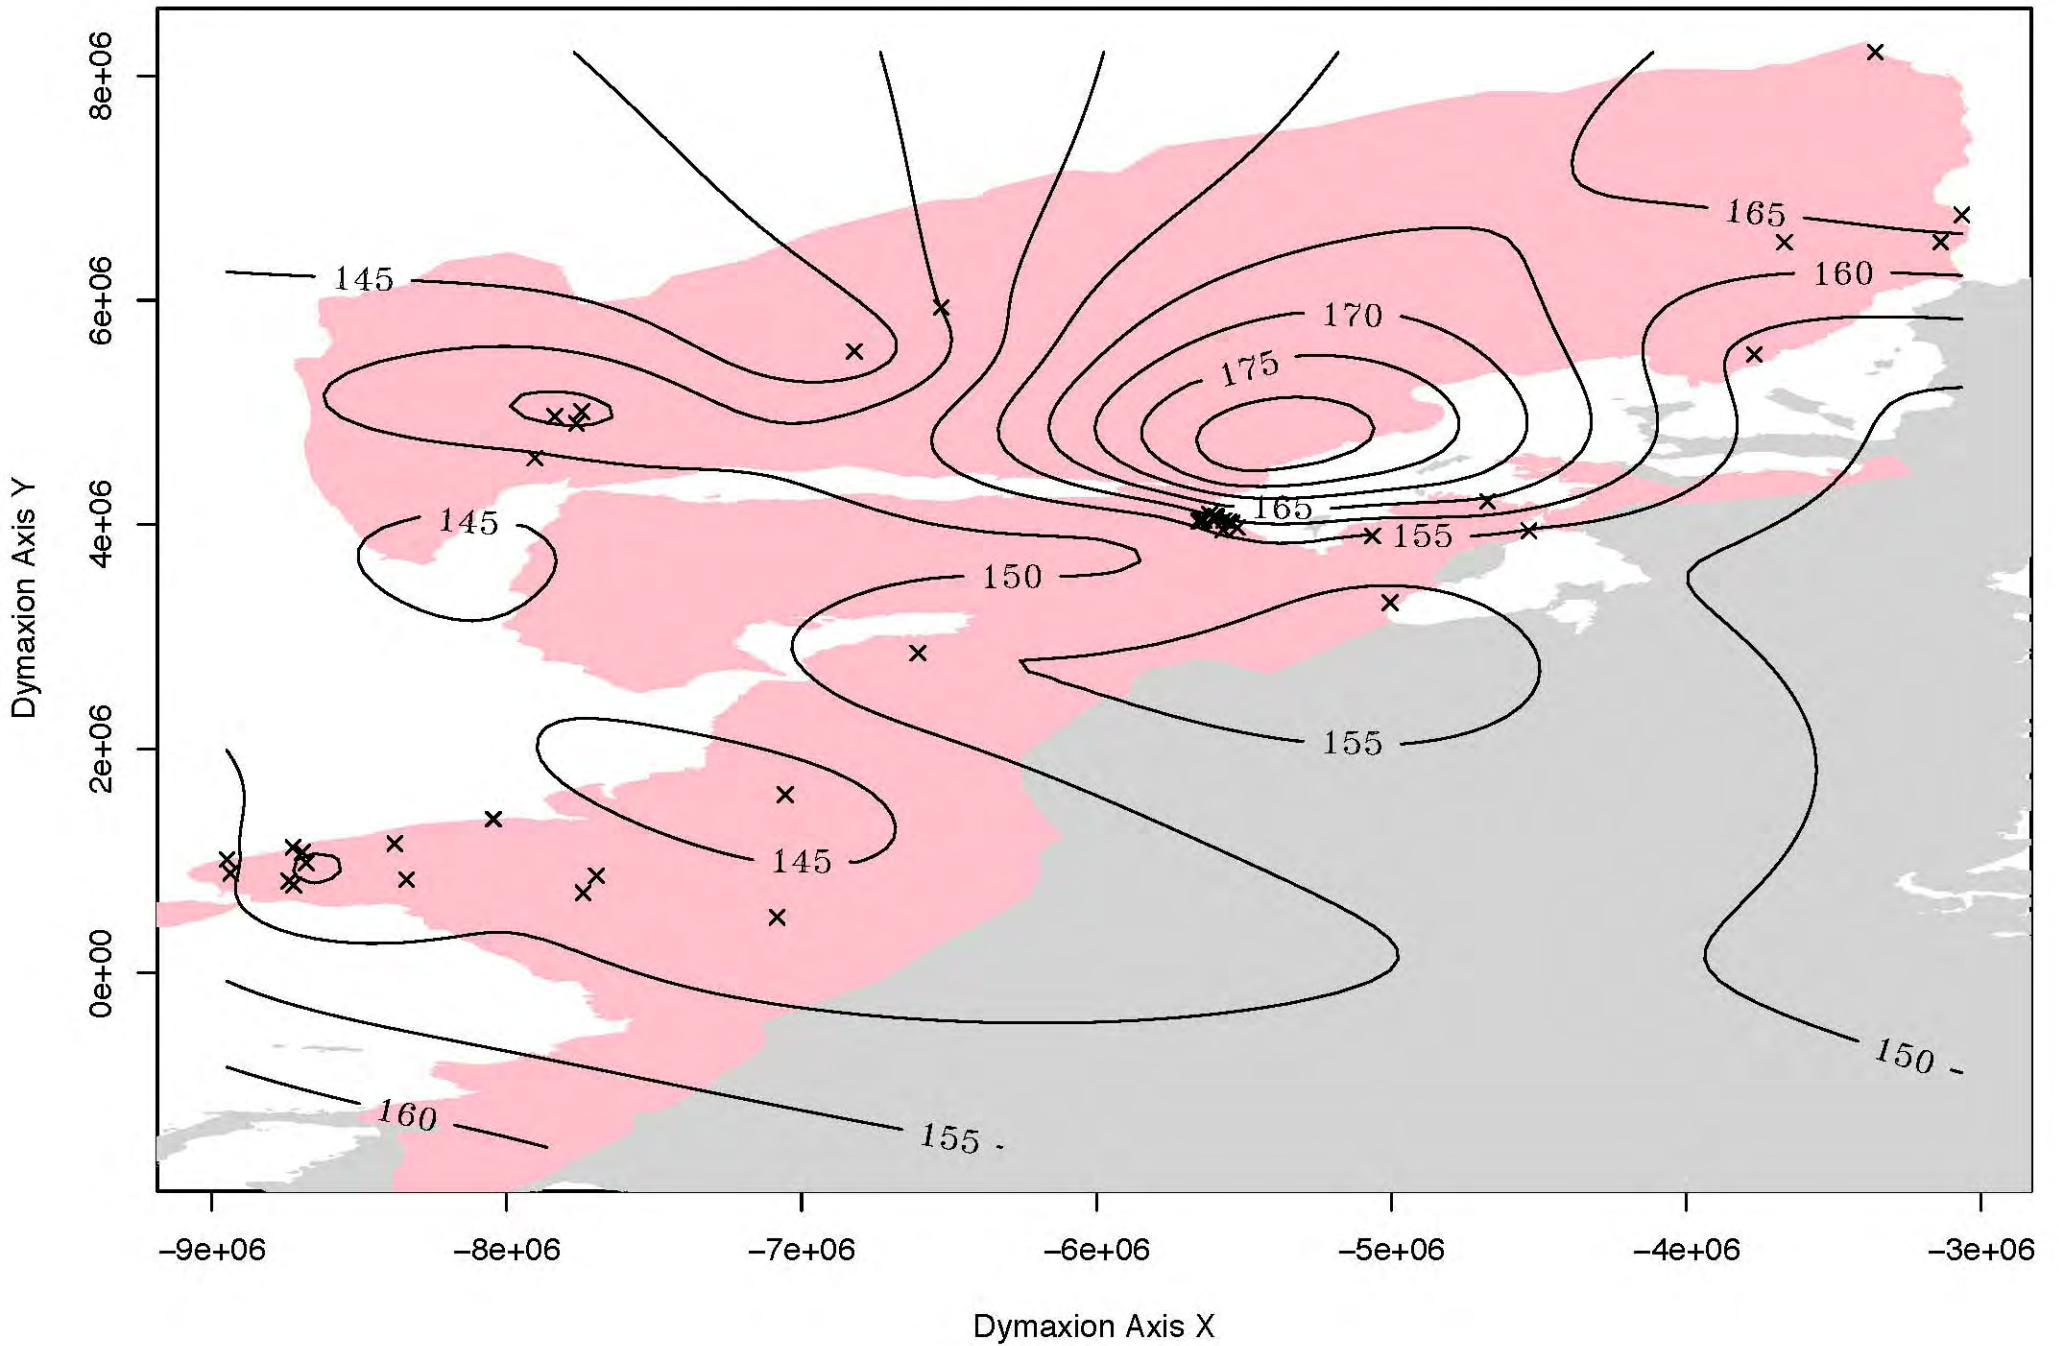



Marginal GAM Surface for CBL in female *Canis aureus*

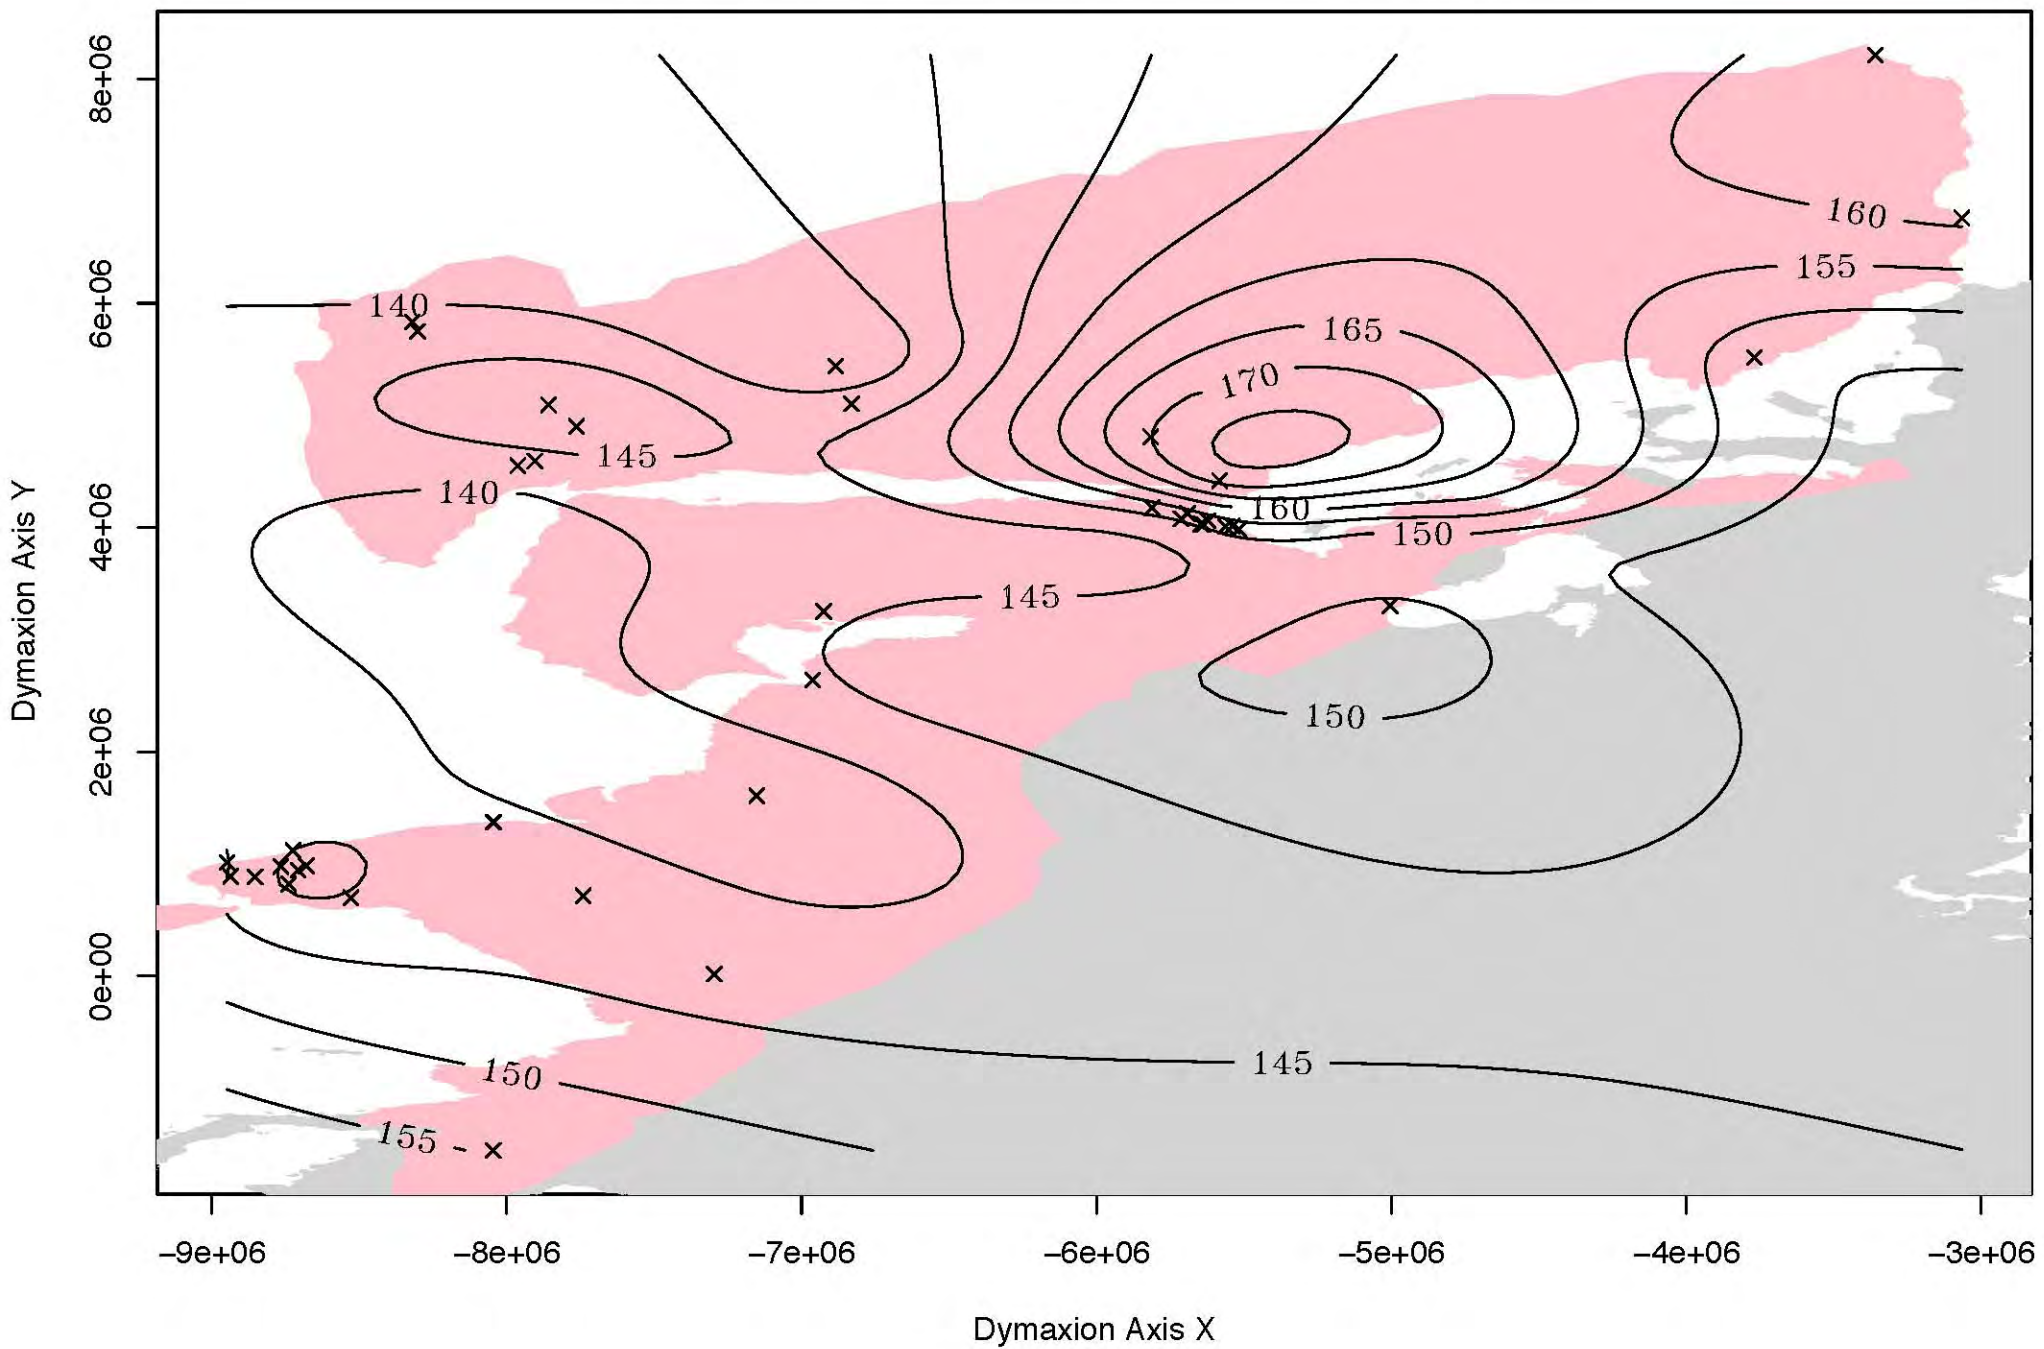

# Marginal GAM Surface for CBL in male *Canis latrans*

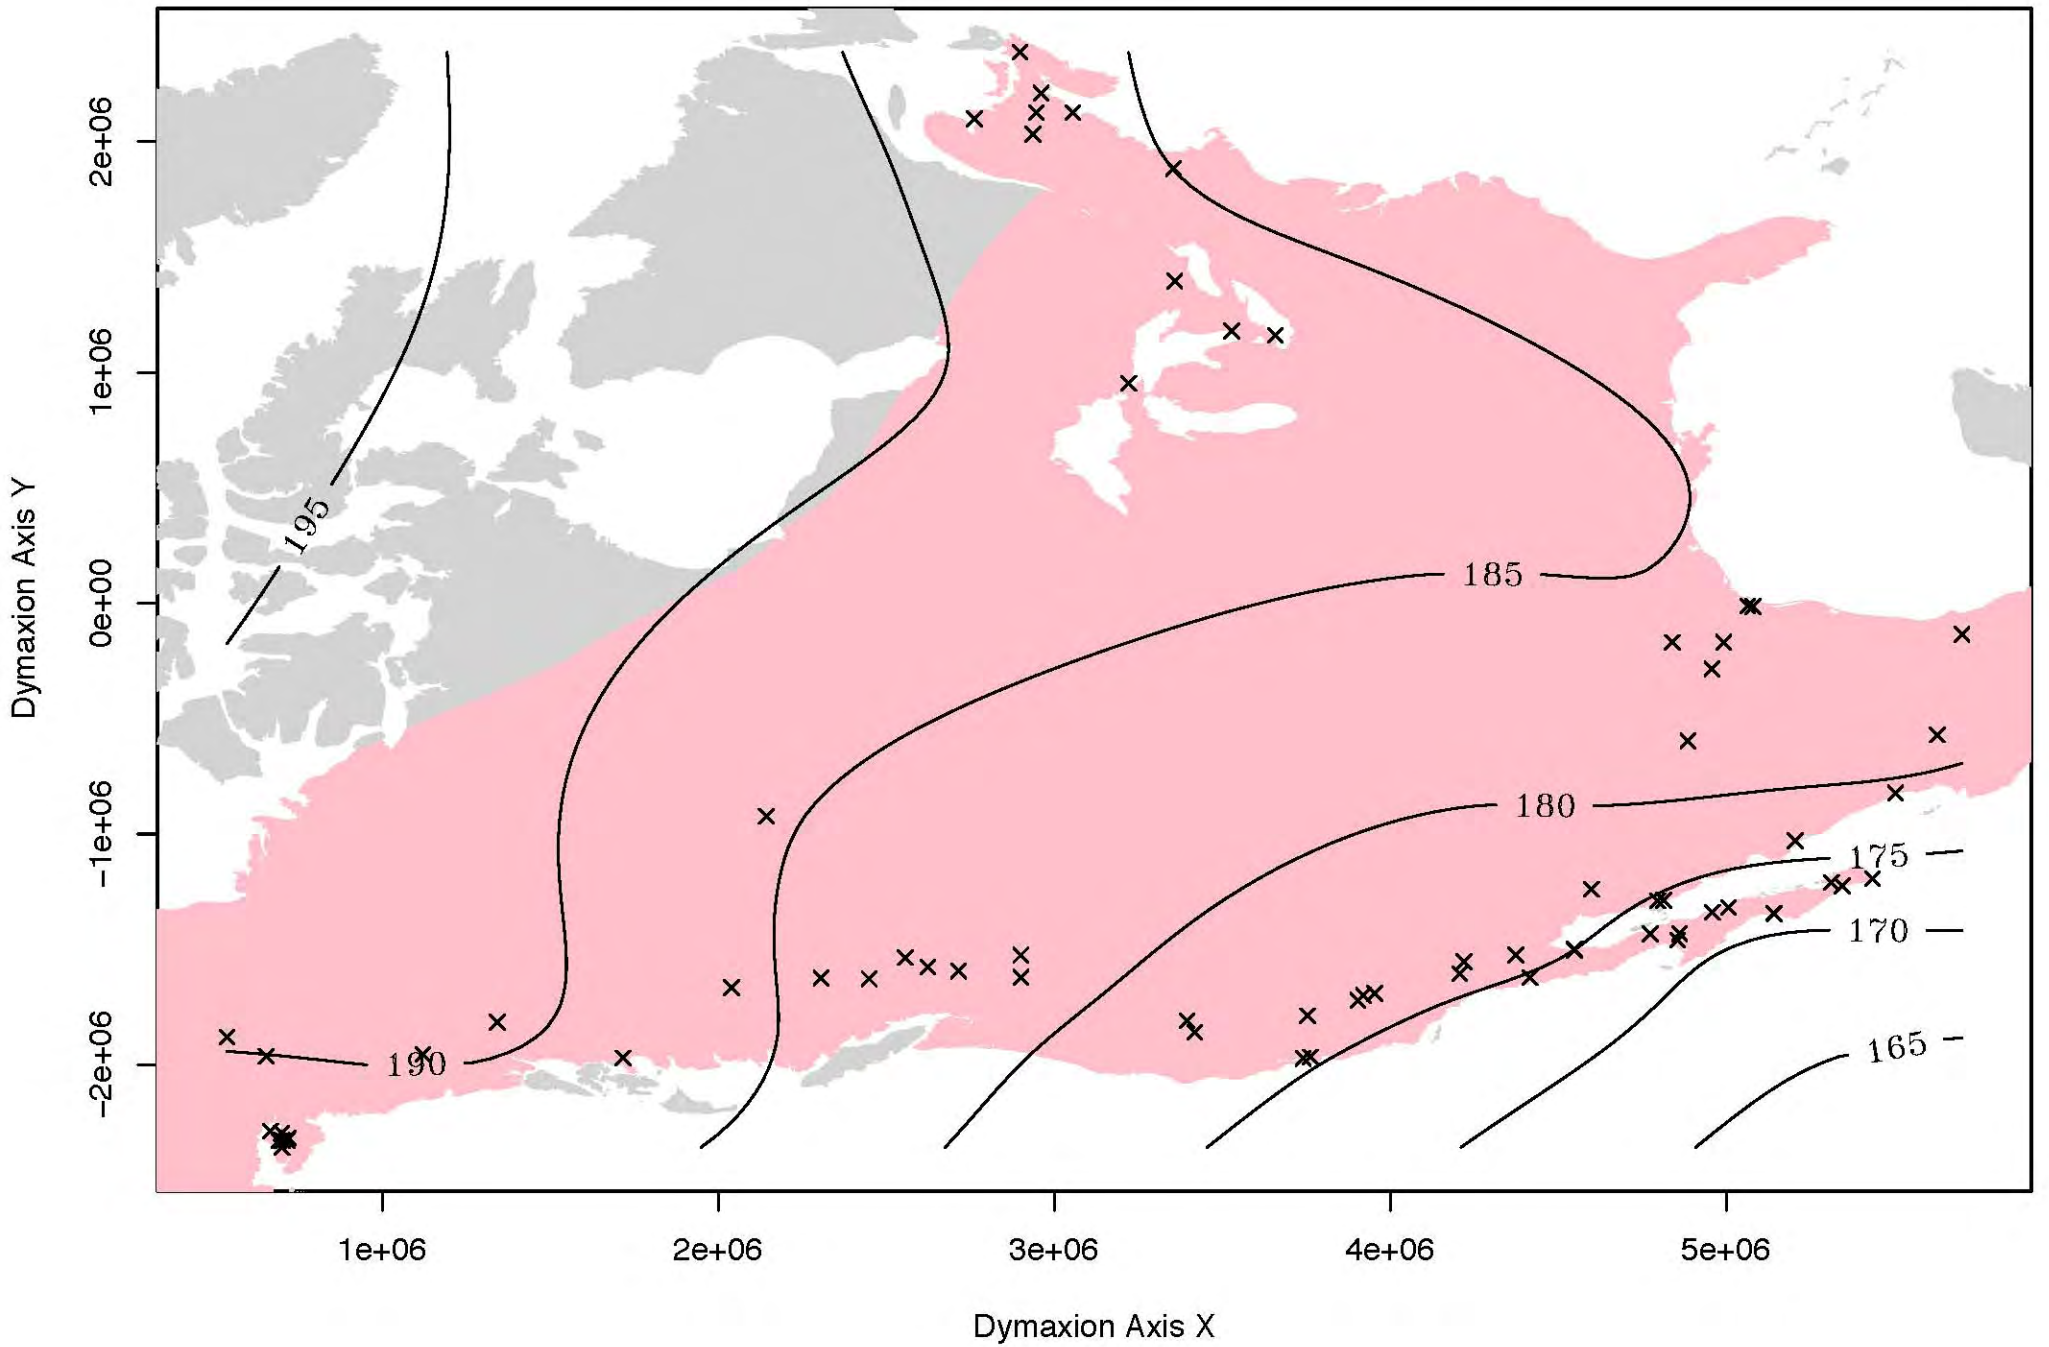

Marginal GAM Surface for CBL in female *Canis latrans*

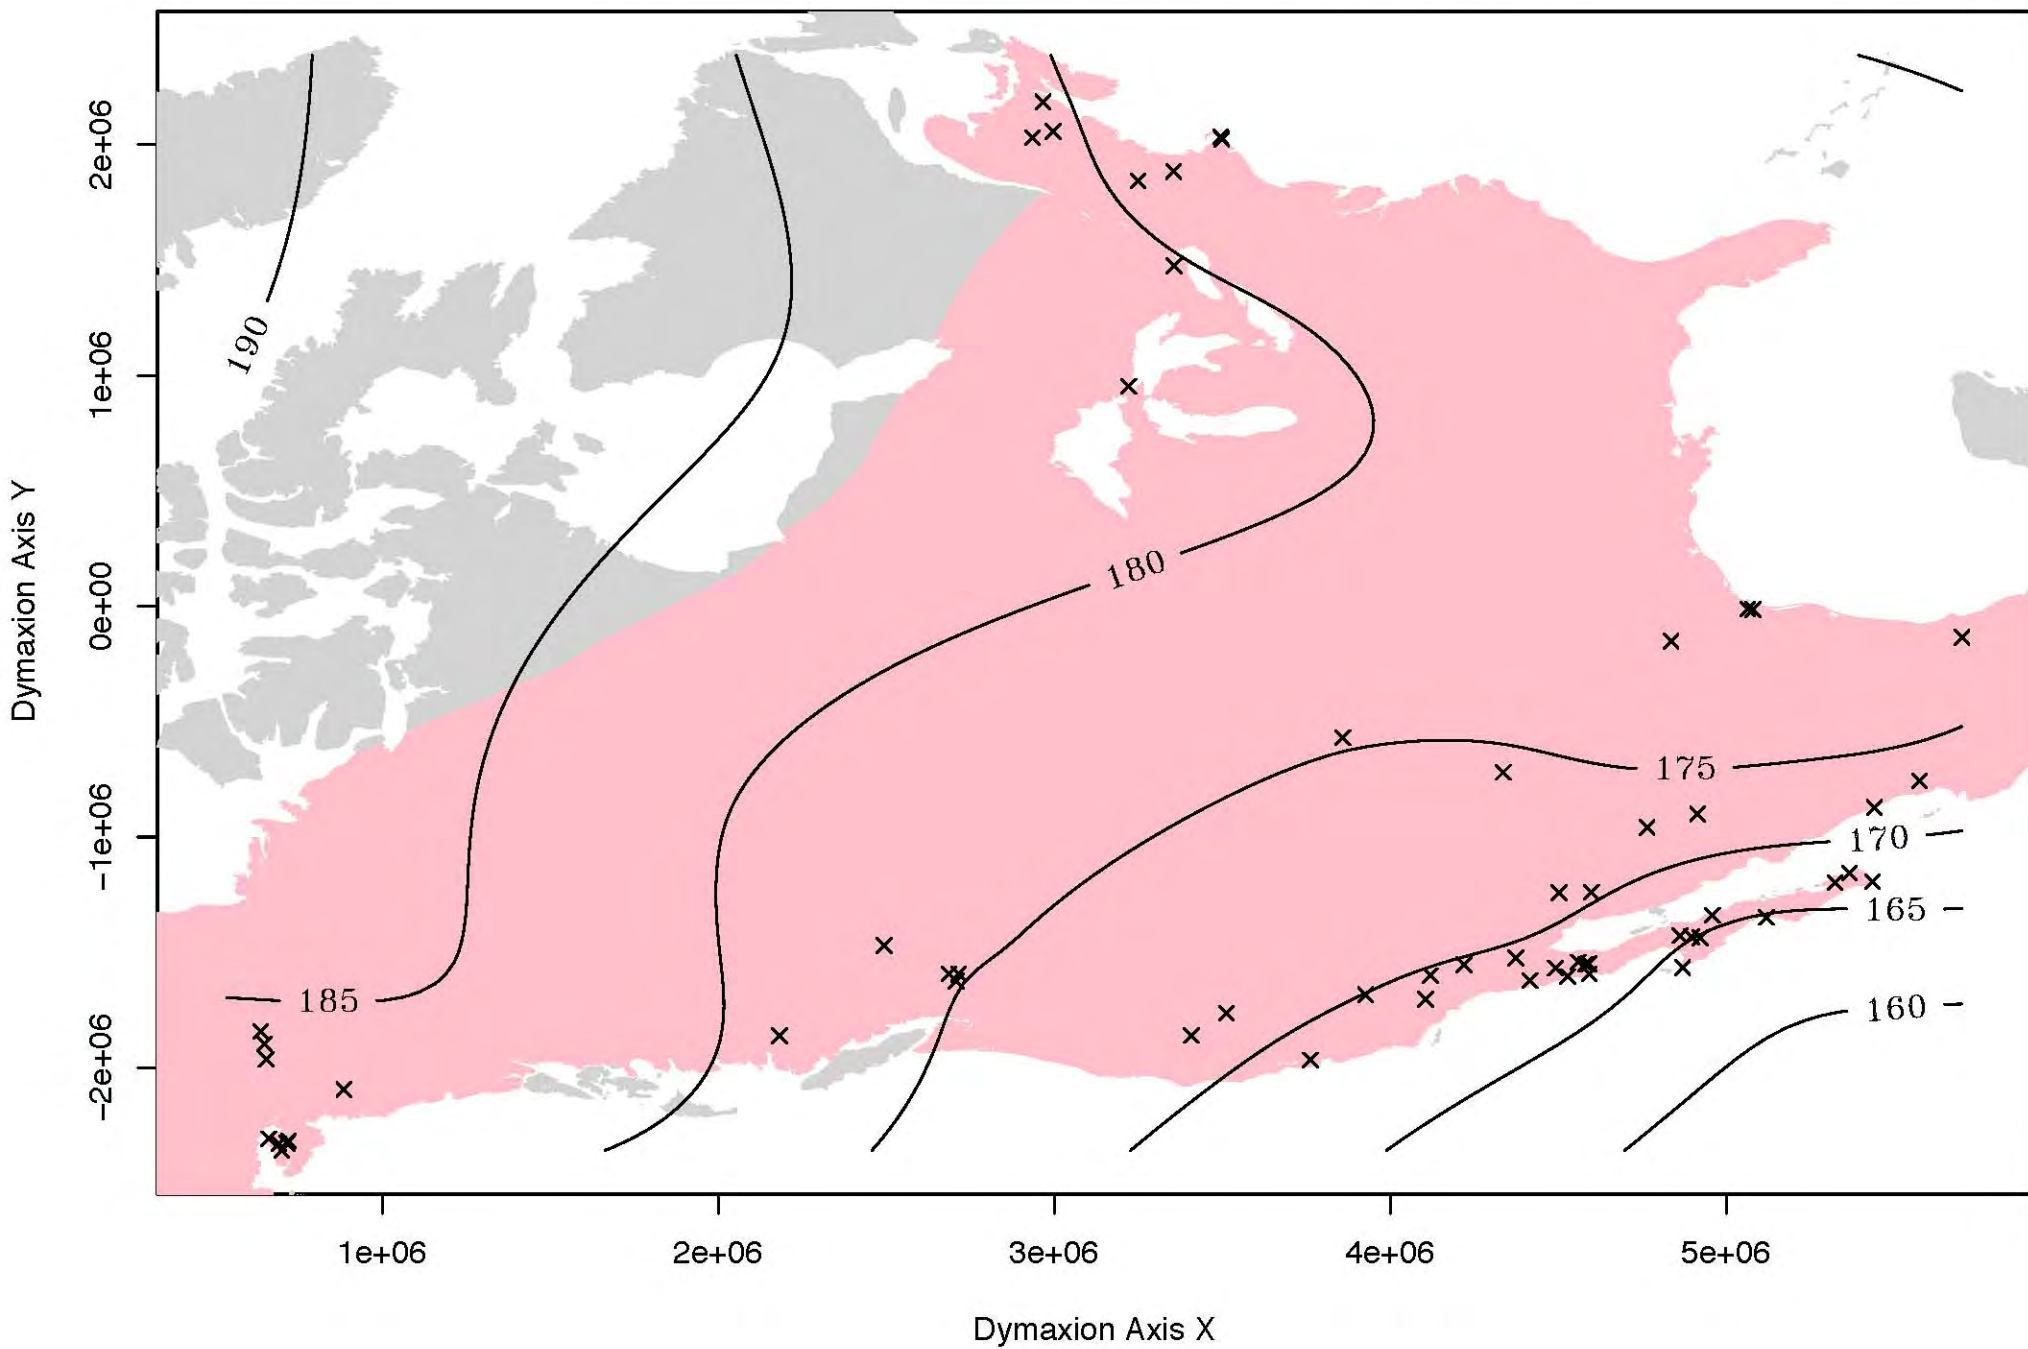



Marginal GAM Surface for CBL in male *Canis lupus*

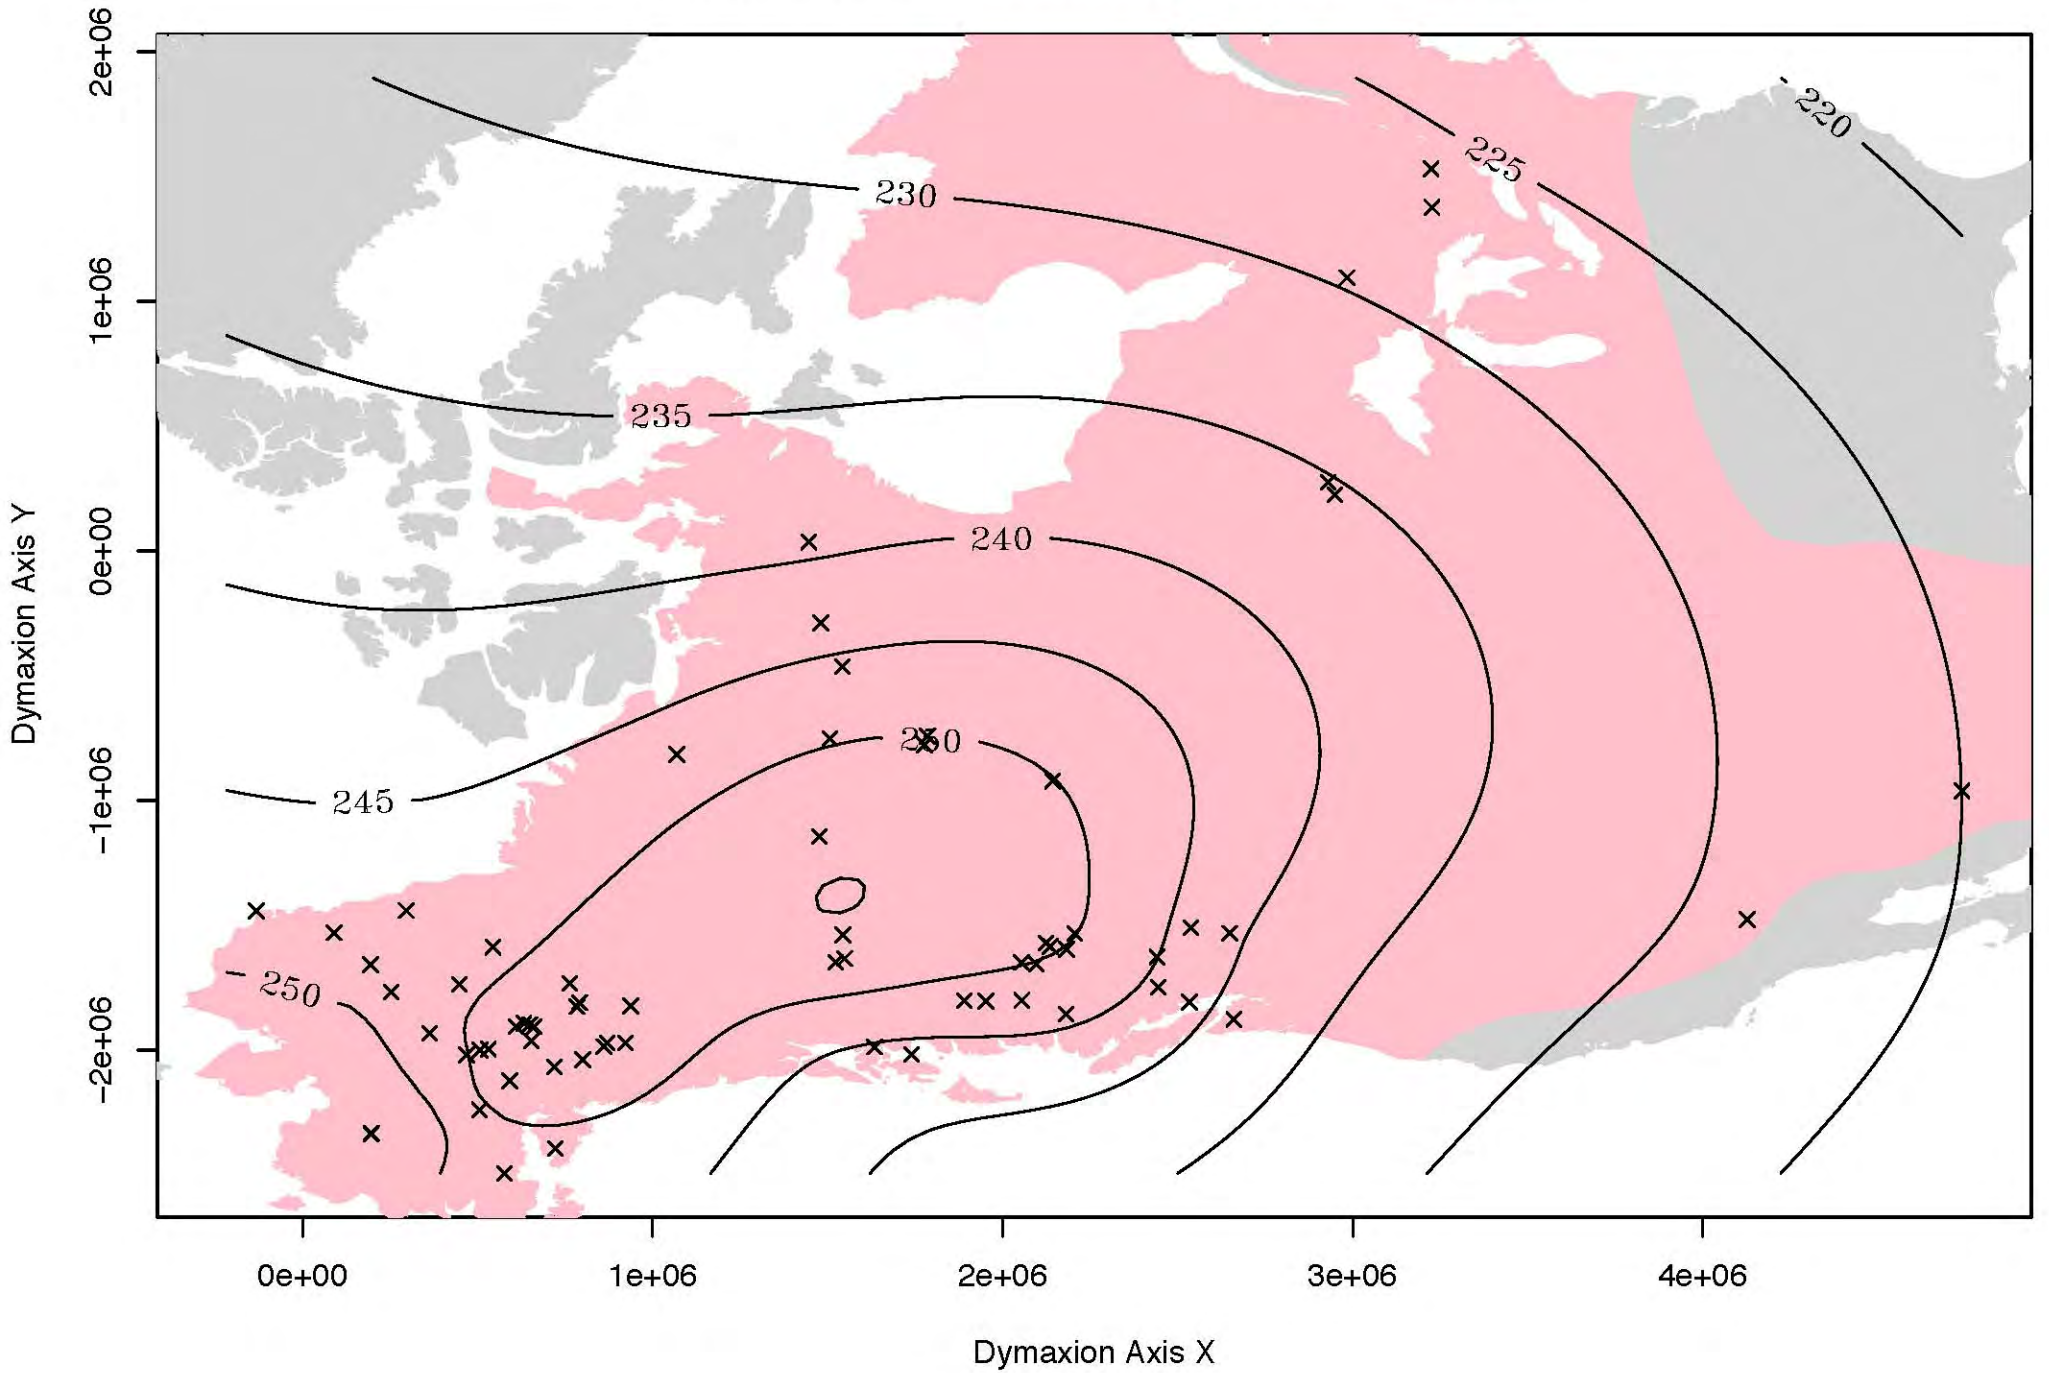



Marginal GAM Surface for CBL in female *Canis lupus*

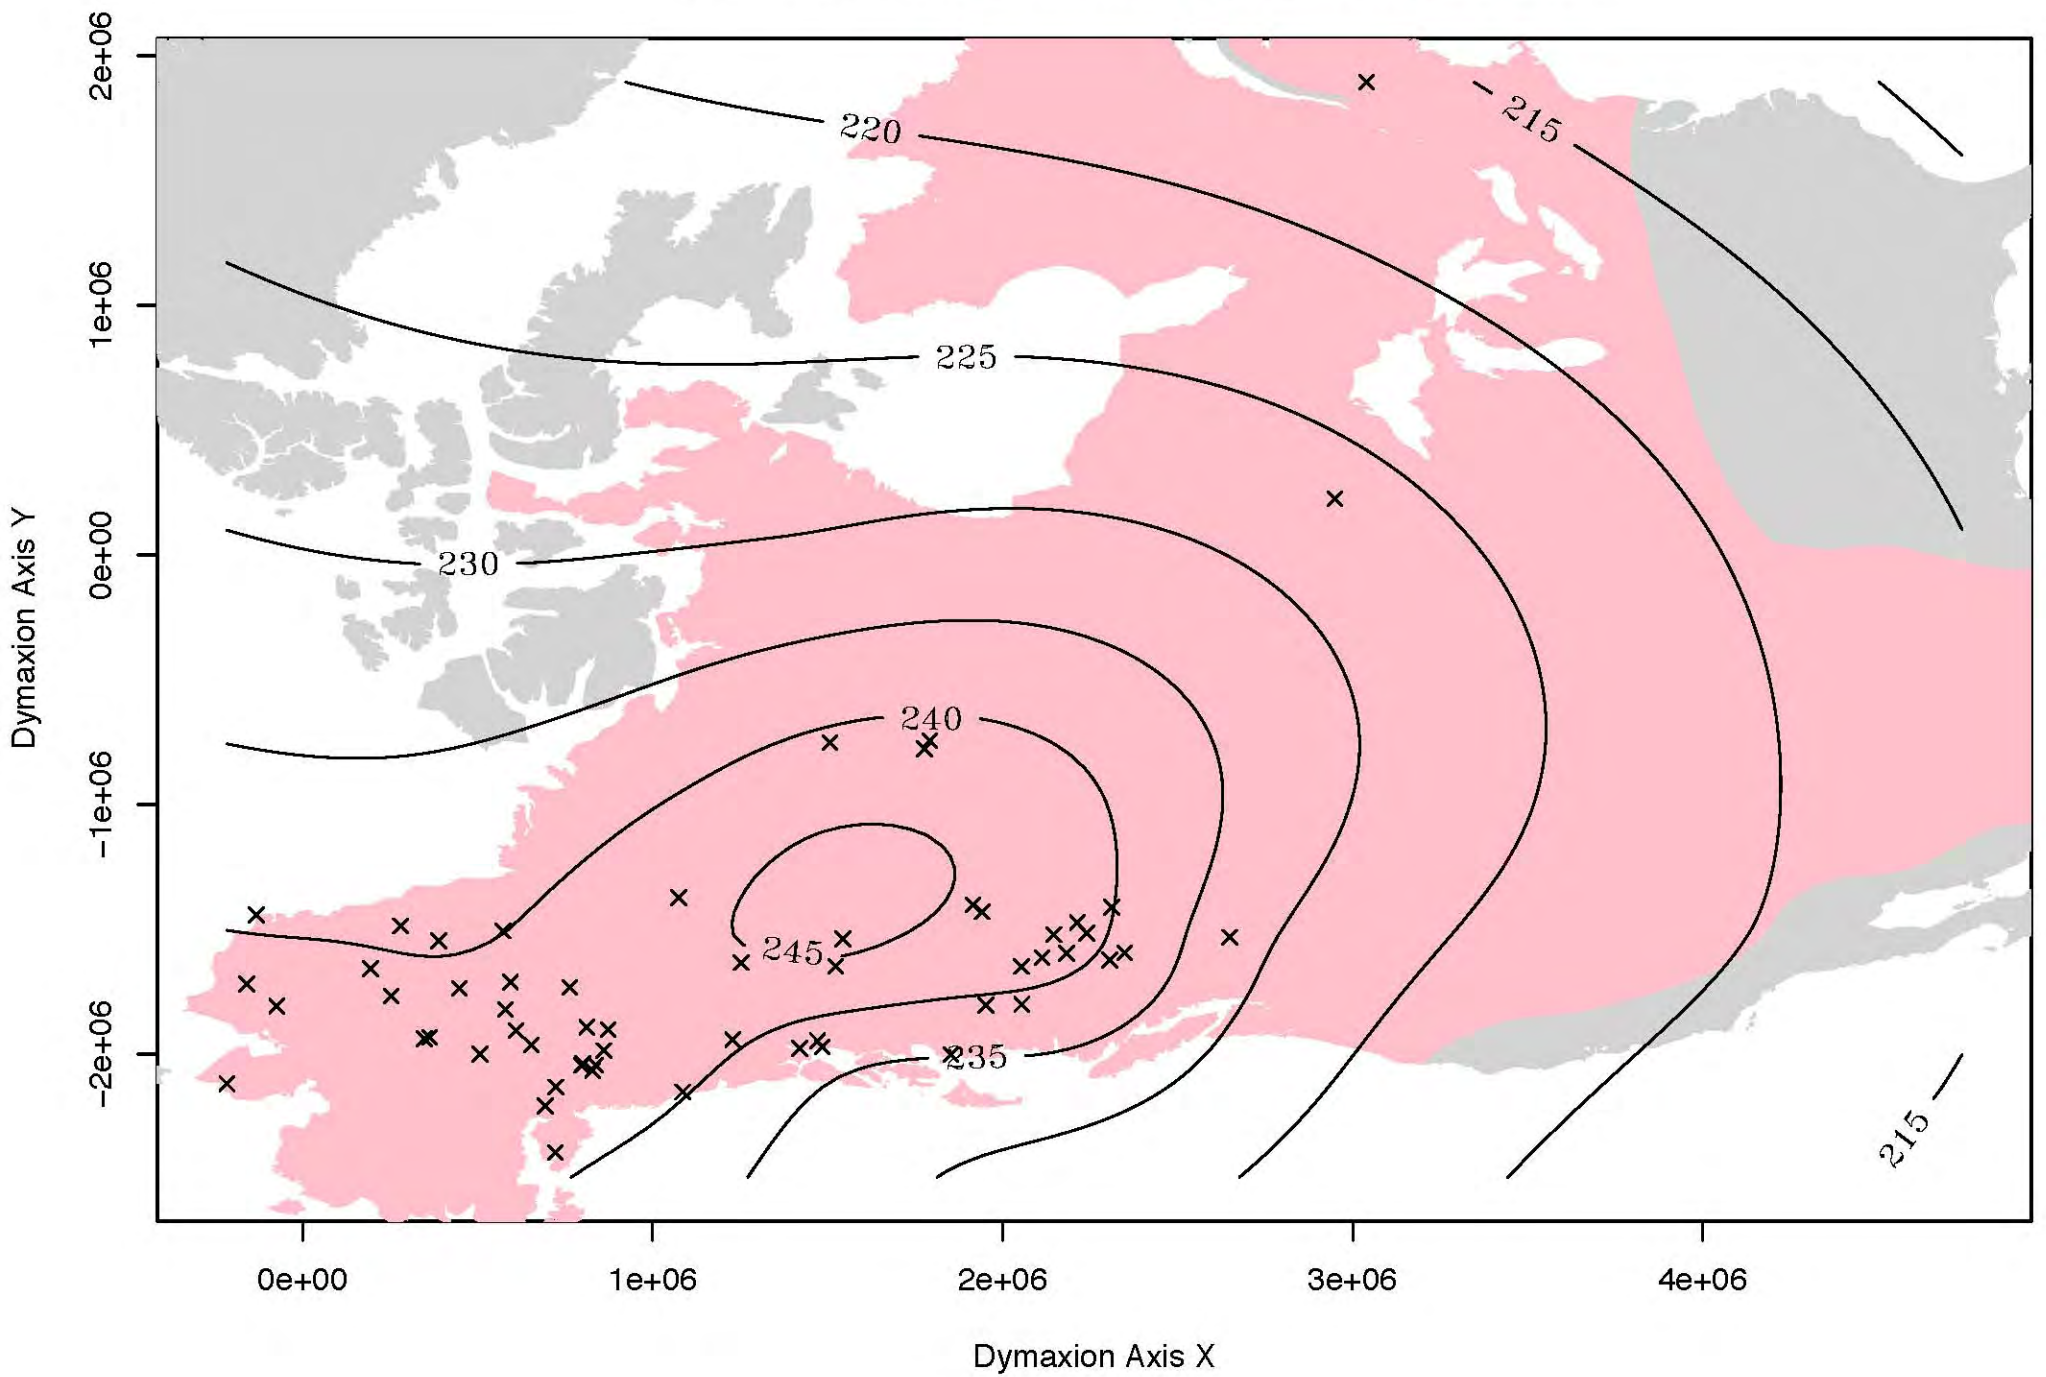

Marginal GAM Surface for CBL in male *Gulo gulo*

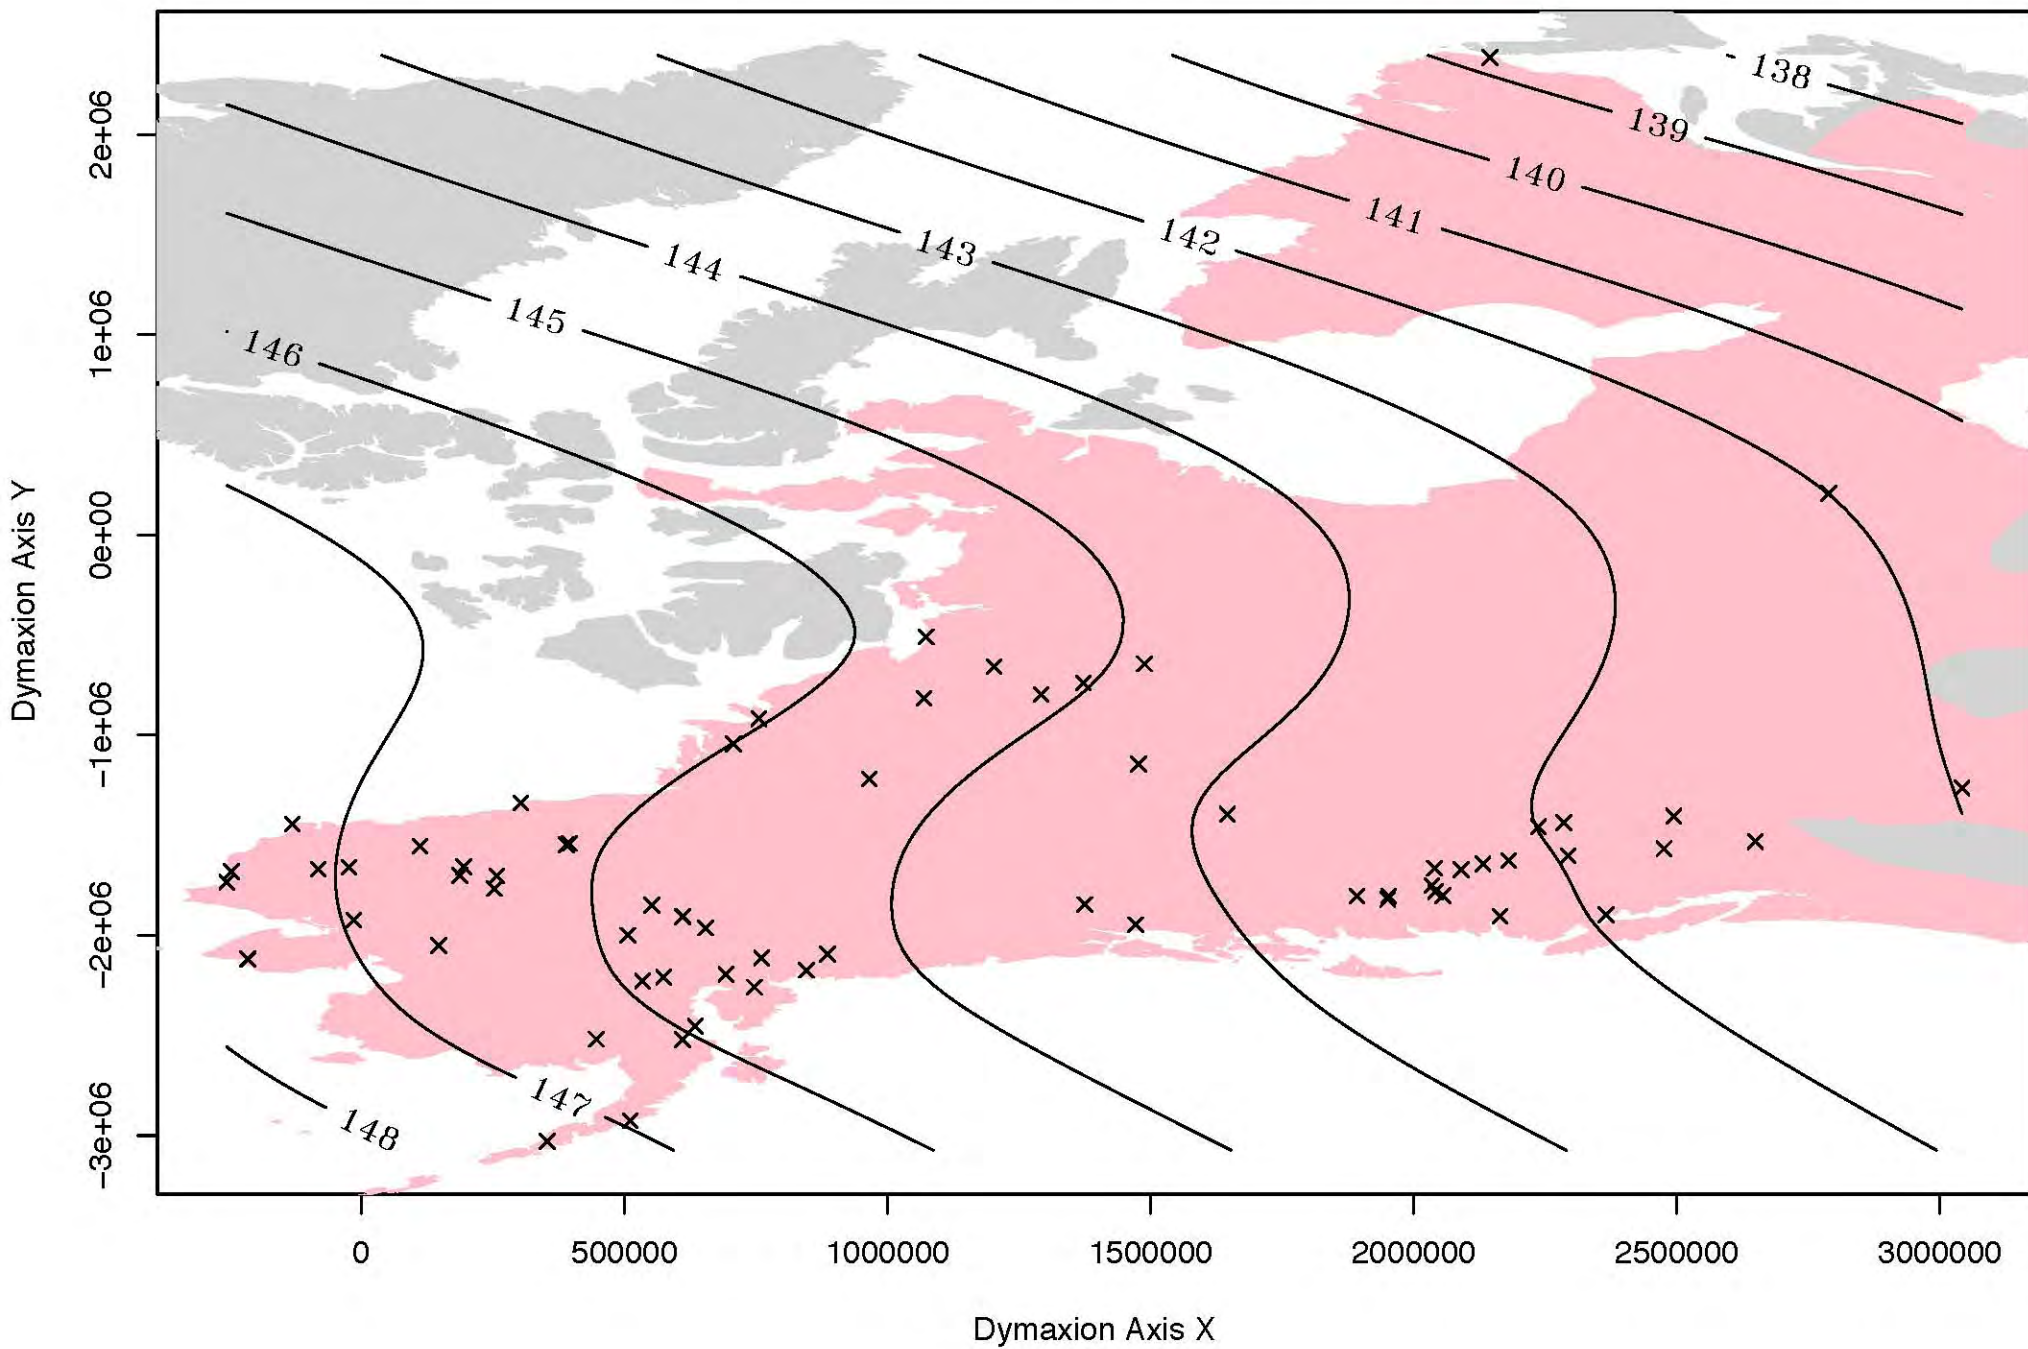



Marginal GAM Surface for CBL in female *Gulo gulo*

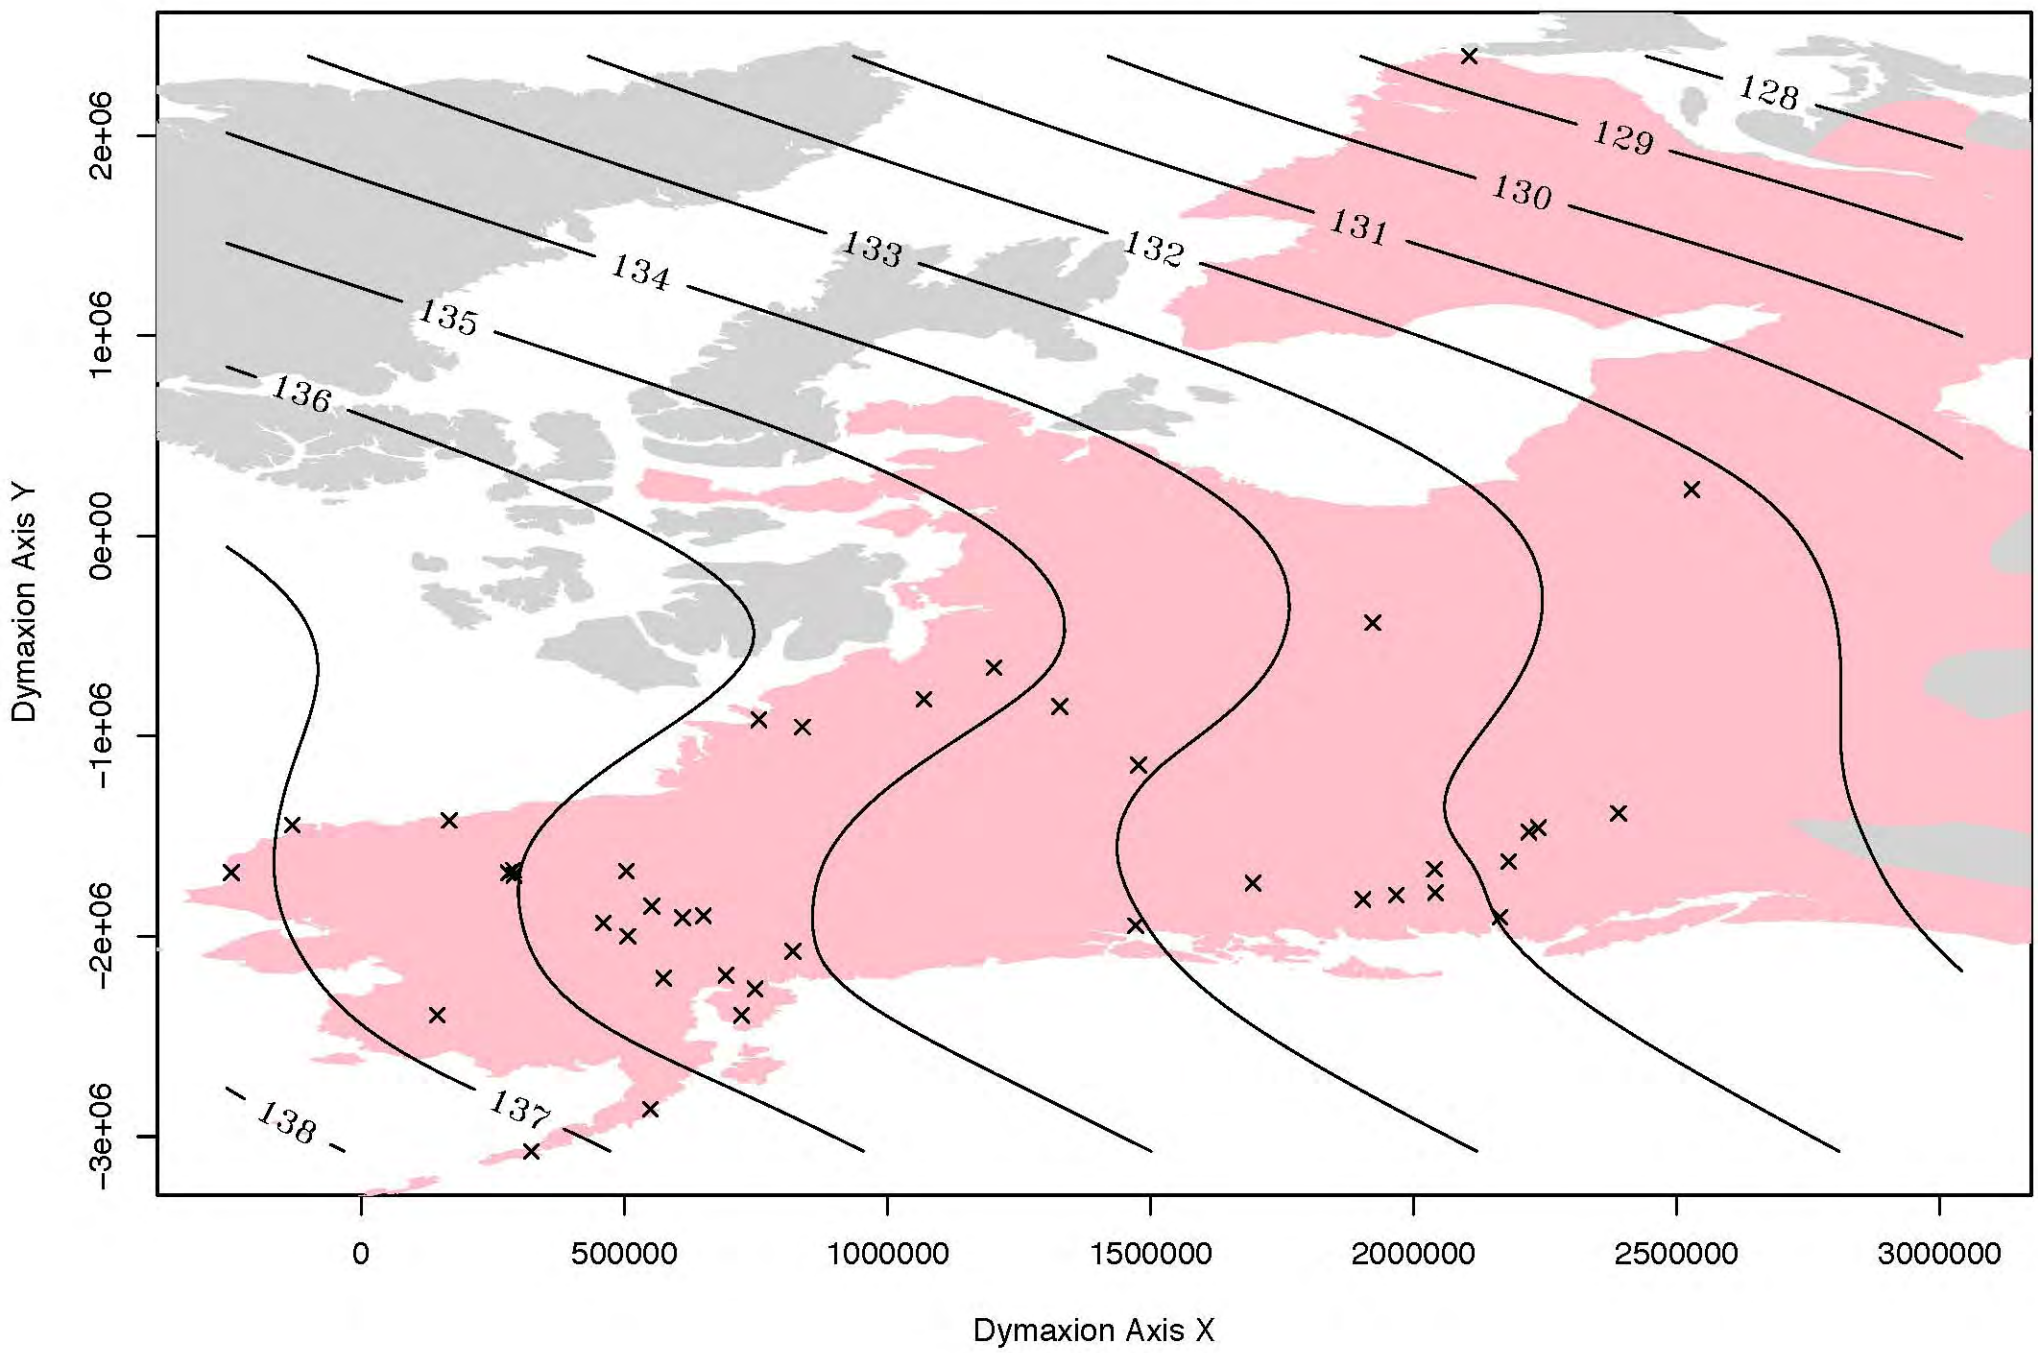

Marginal GAM Surface for CBL in male *Herpestes edwardsii*

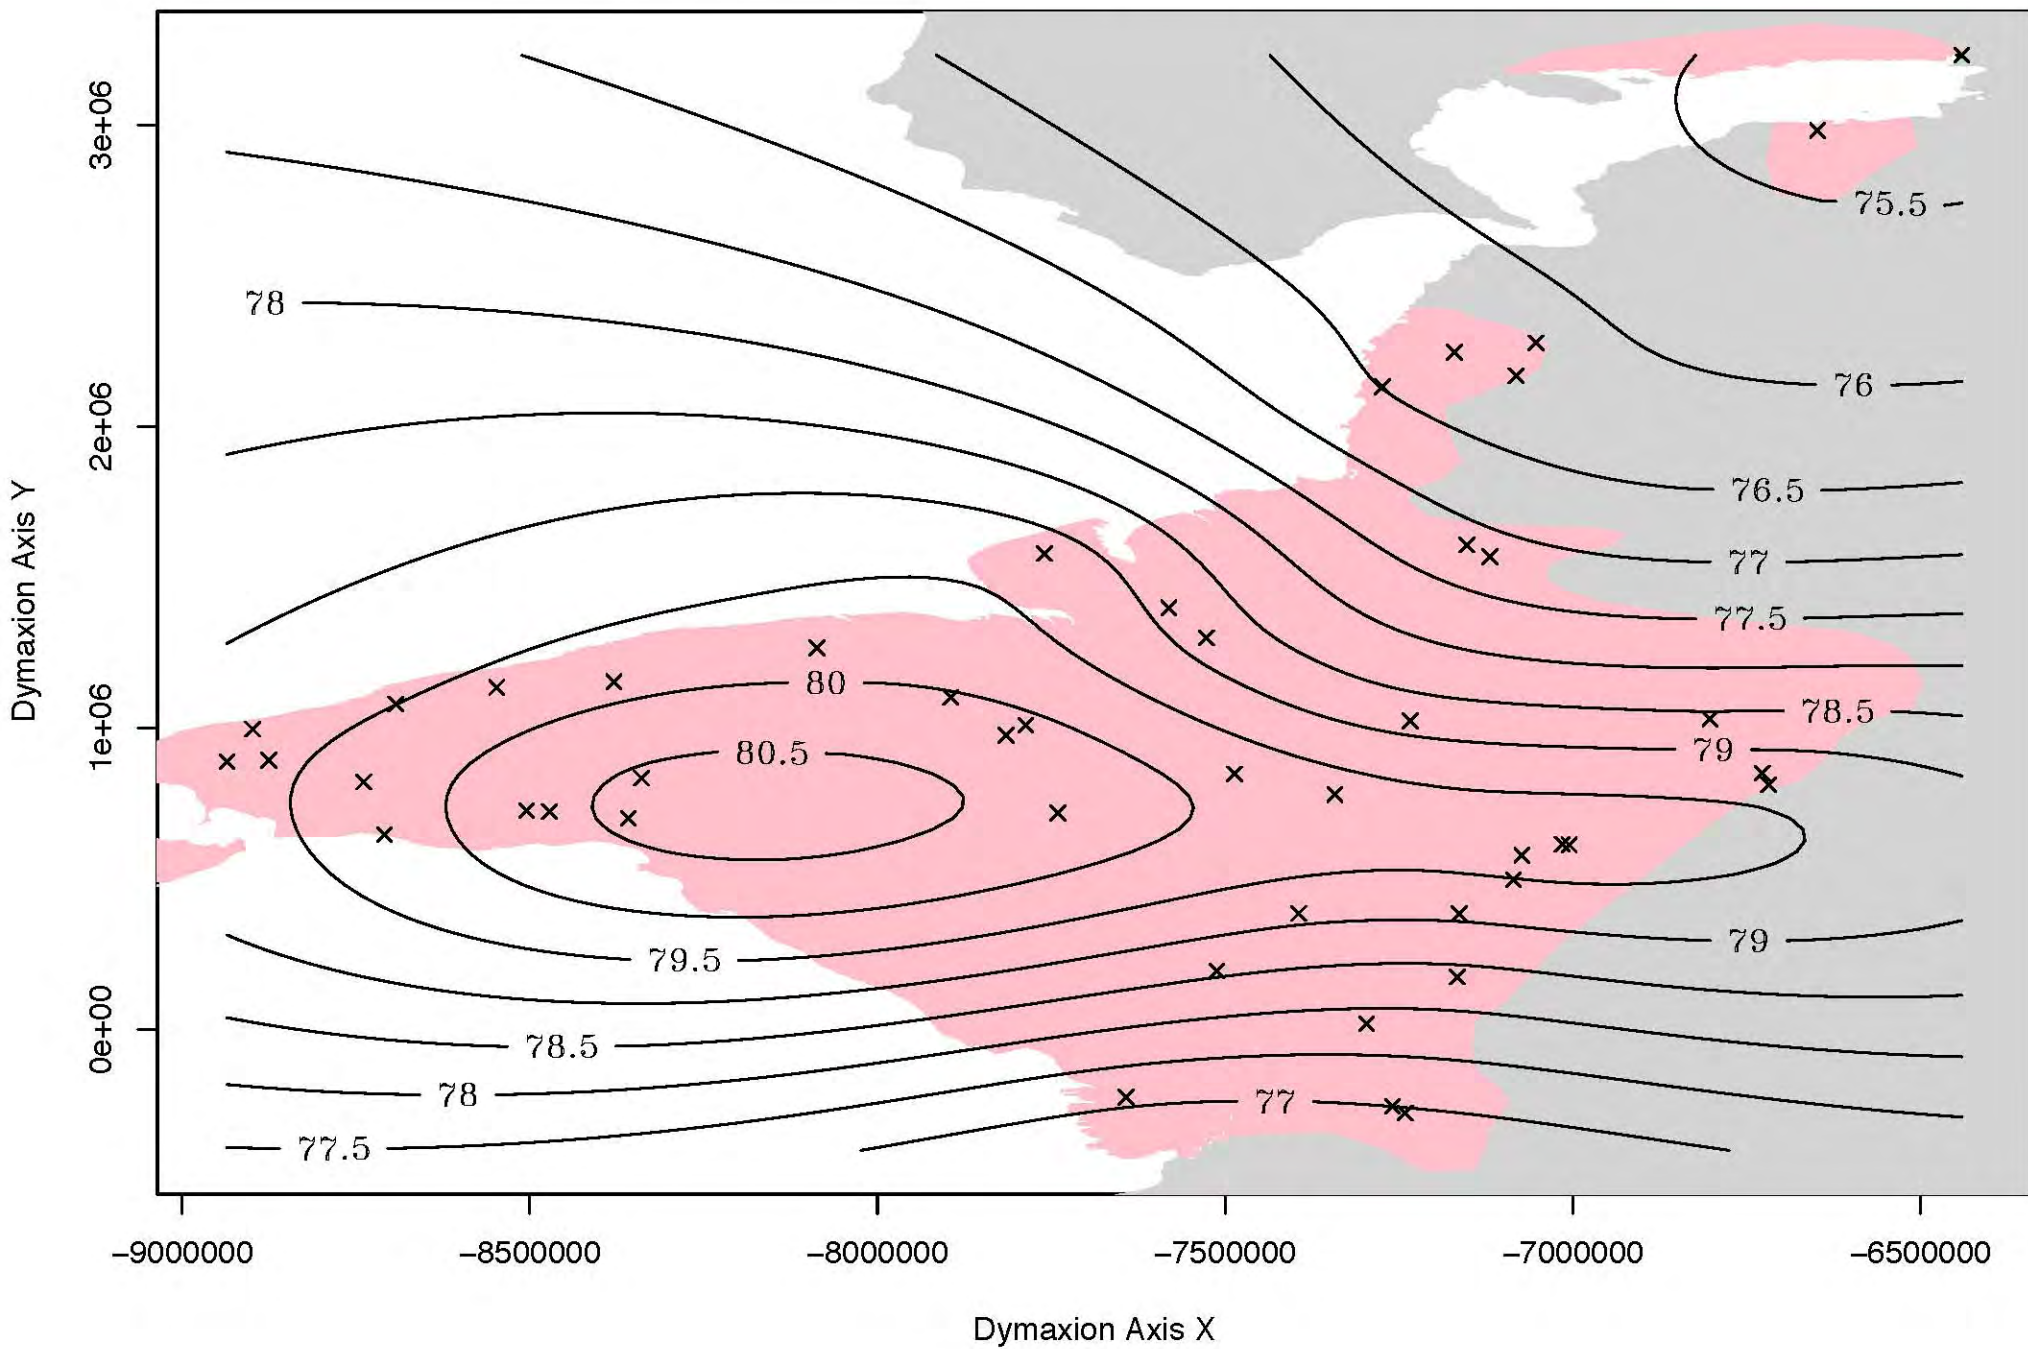



Marginal GAM Surface for CBL in female *Herpestes edwardsii*

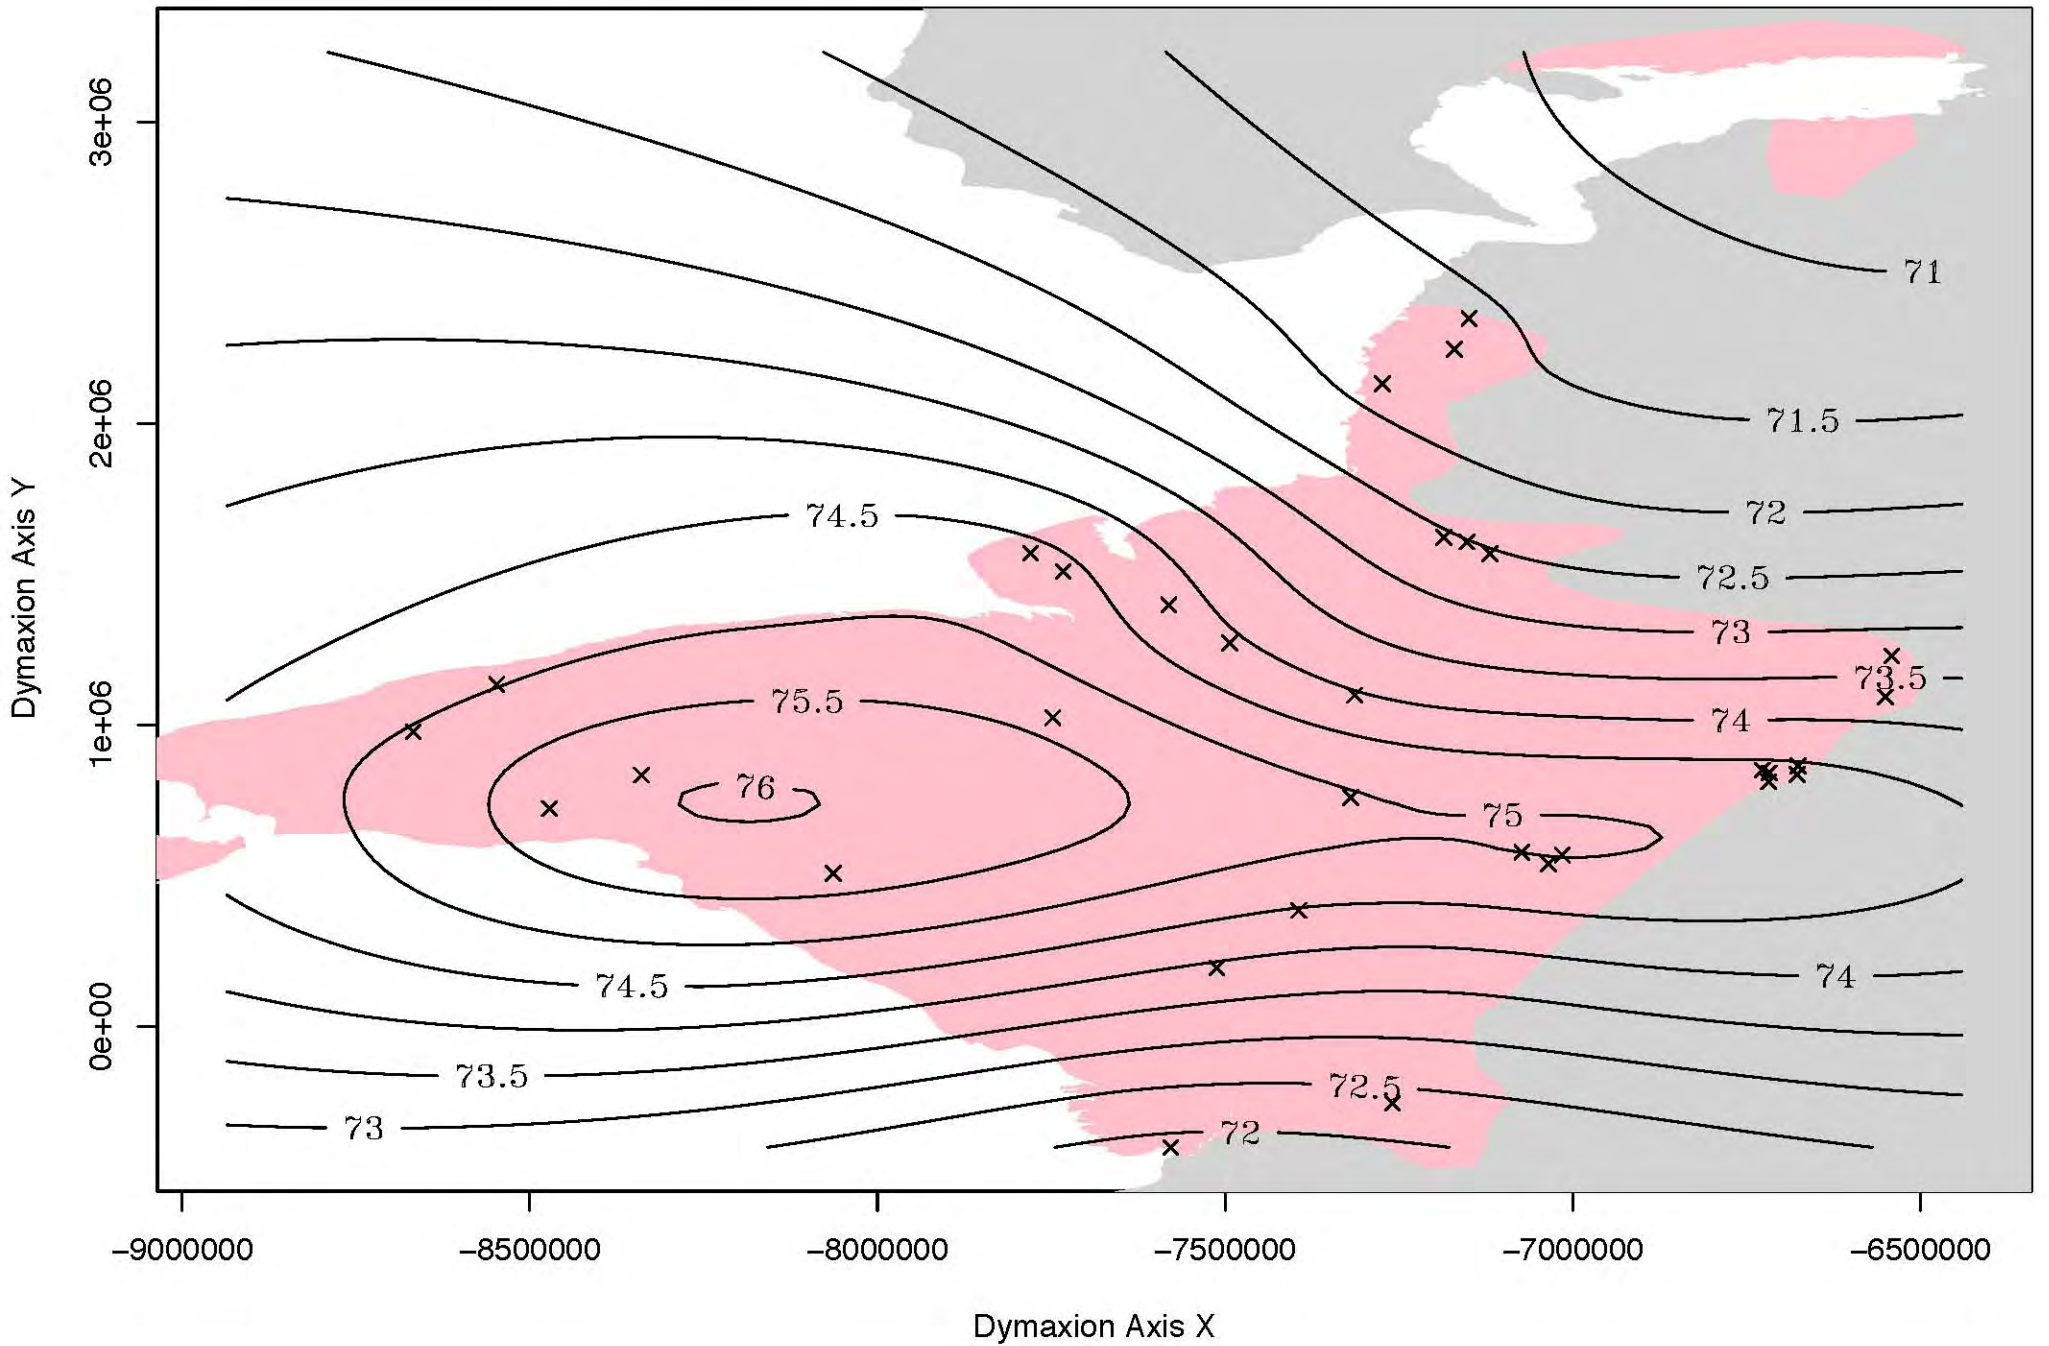

Marginal GAM Surface for CBL in male *Lontra canadensis*

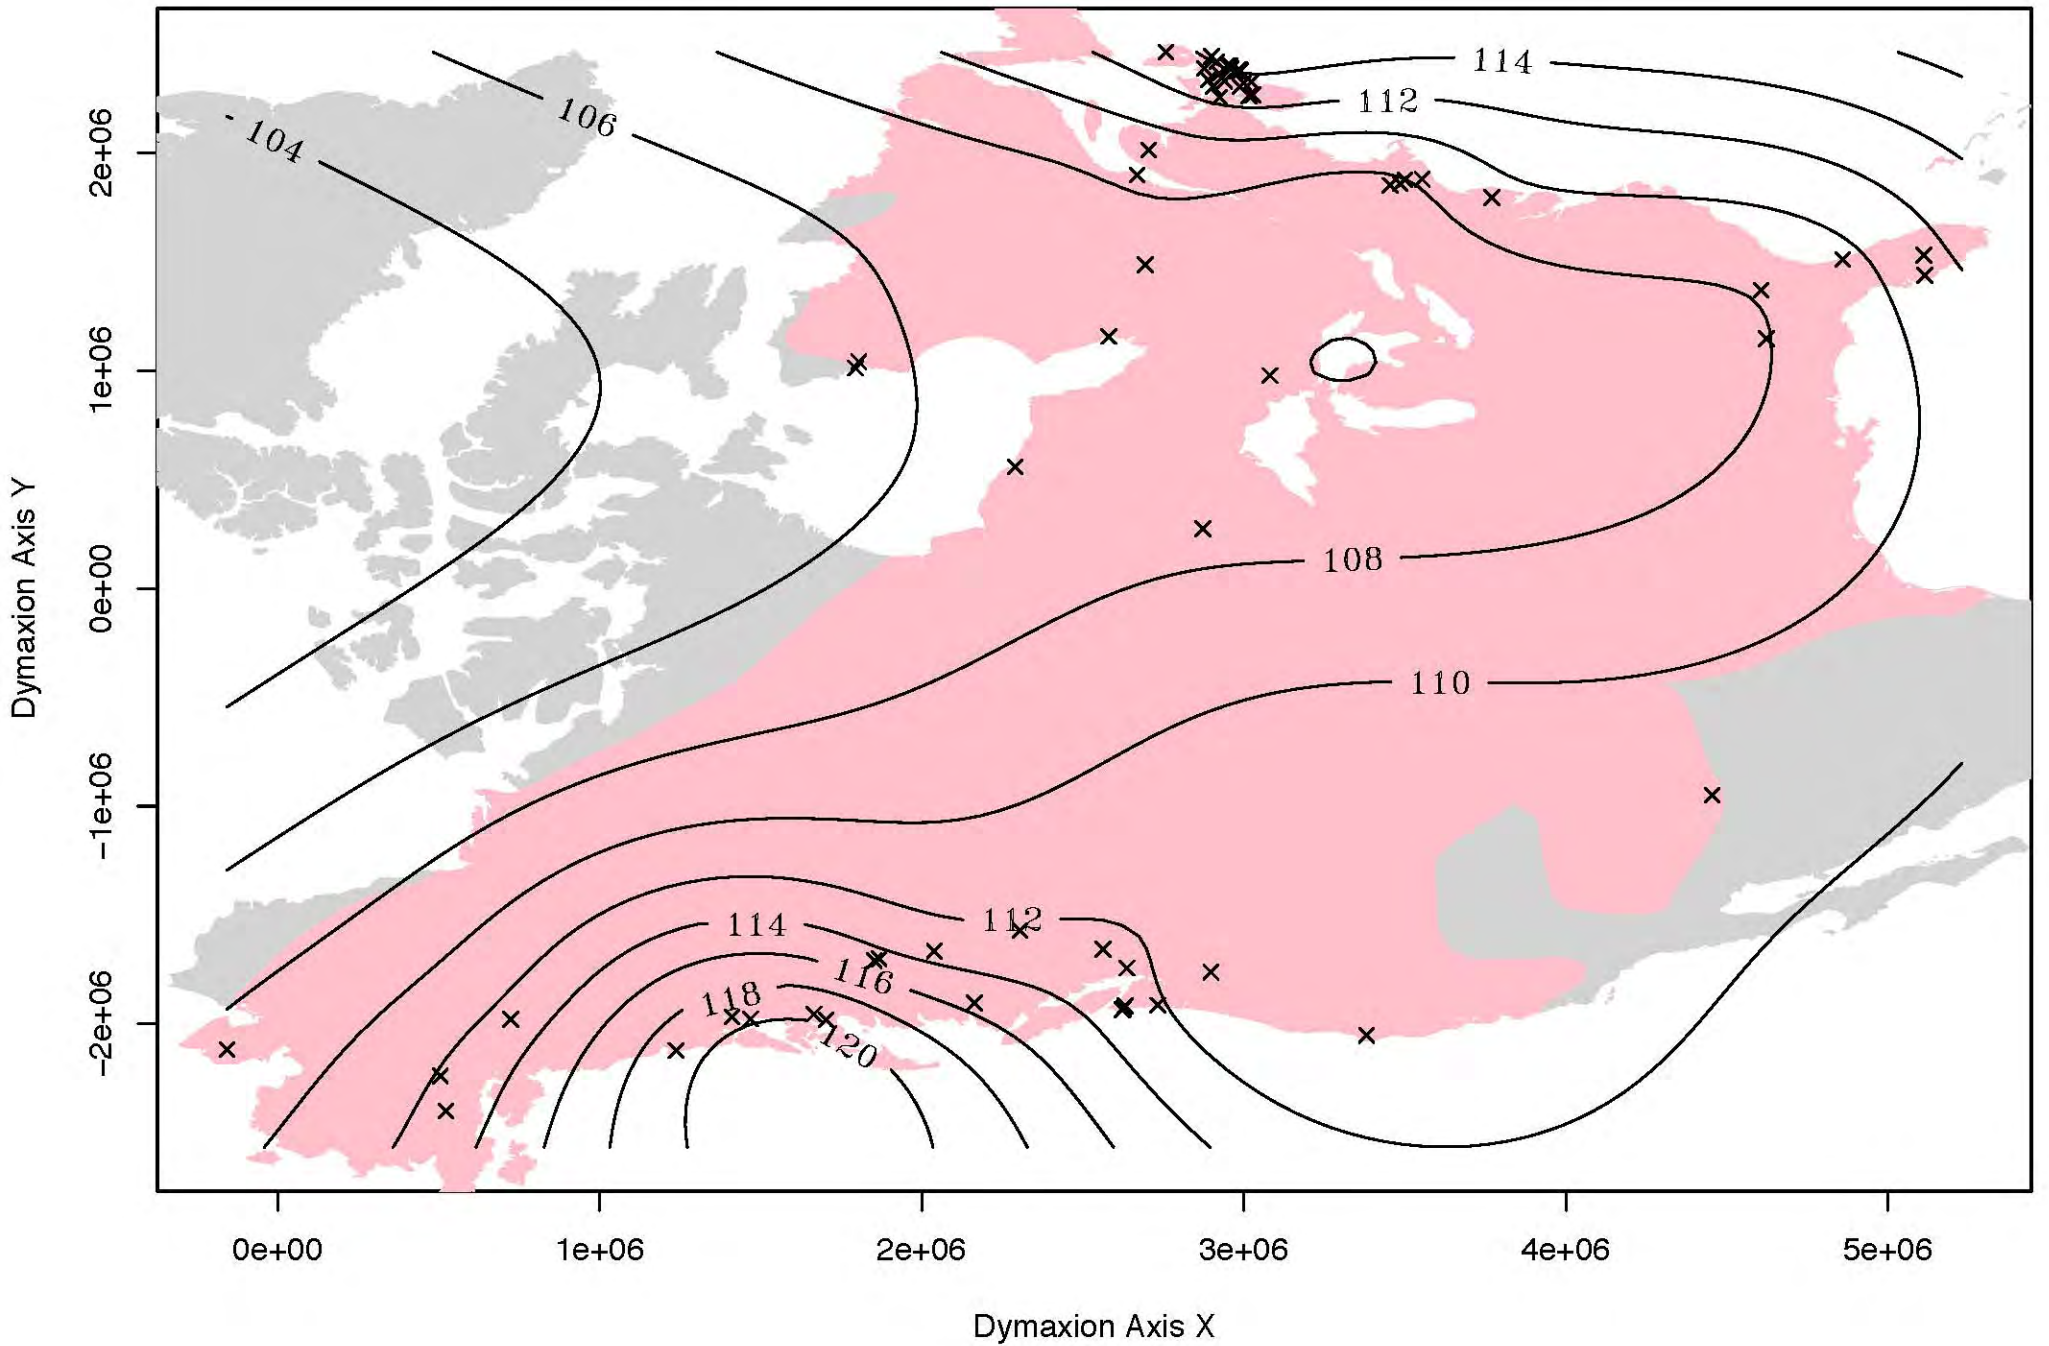



Marginal GAM Surface for CBL in female *Lontra canadensis*

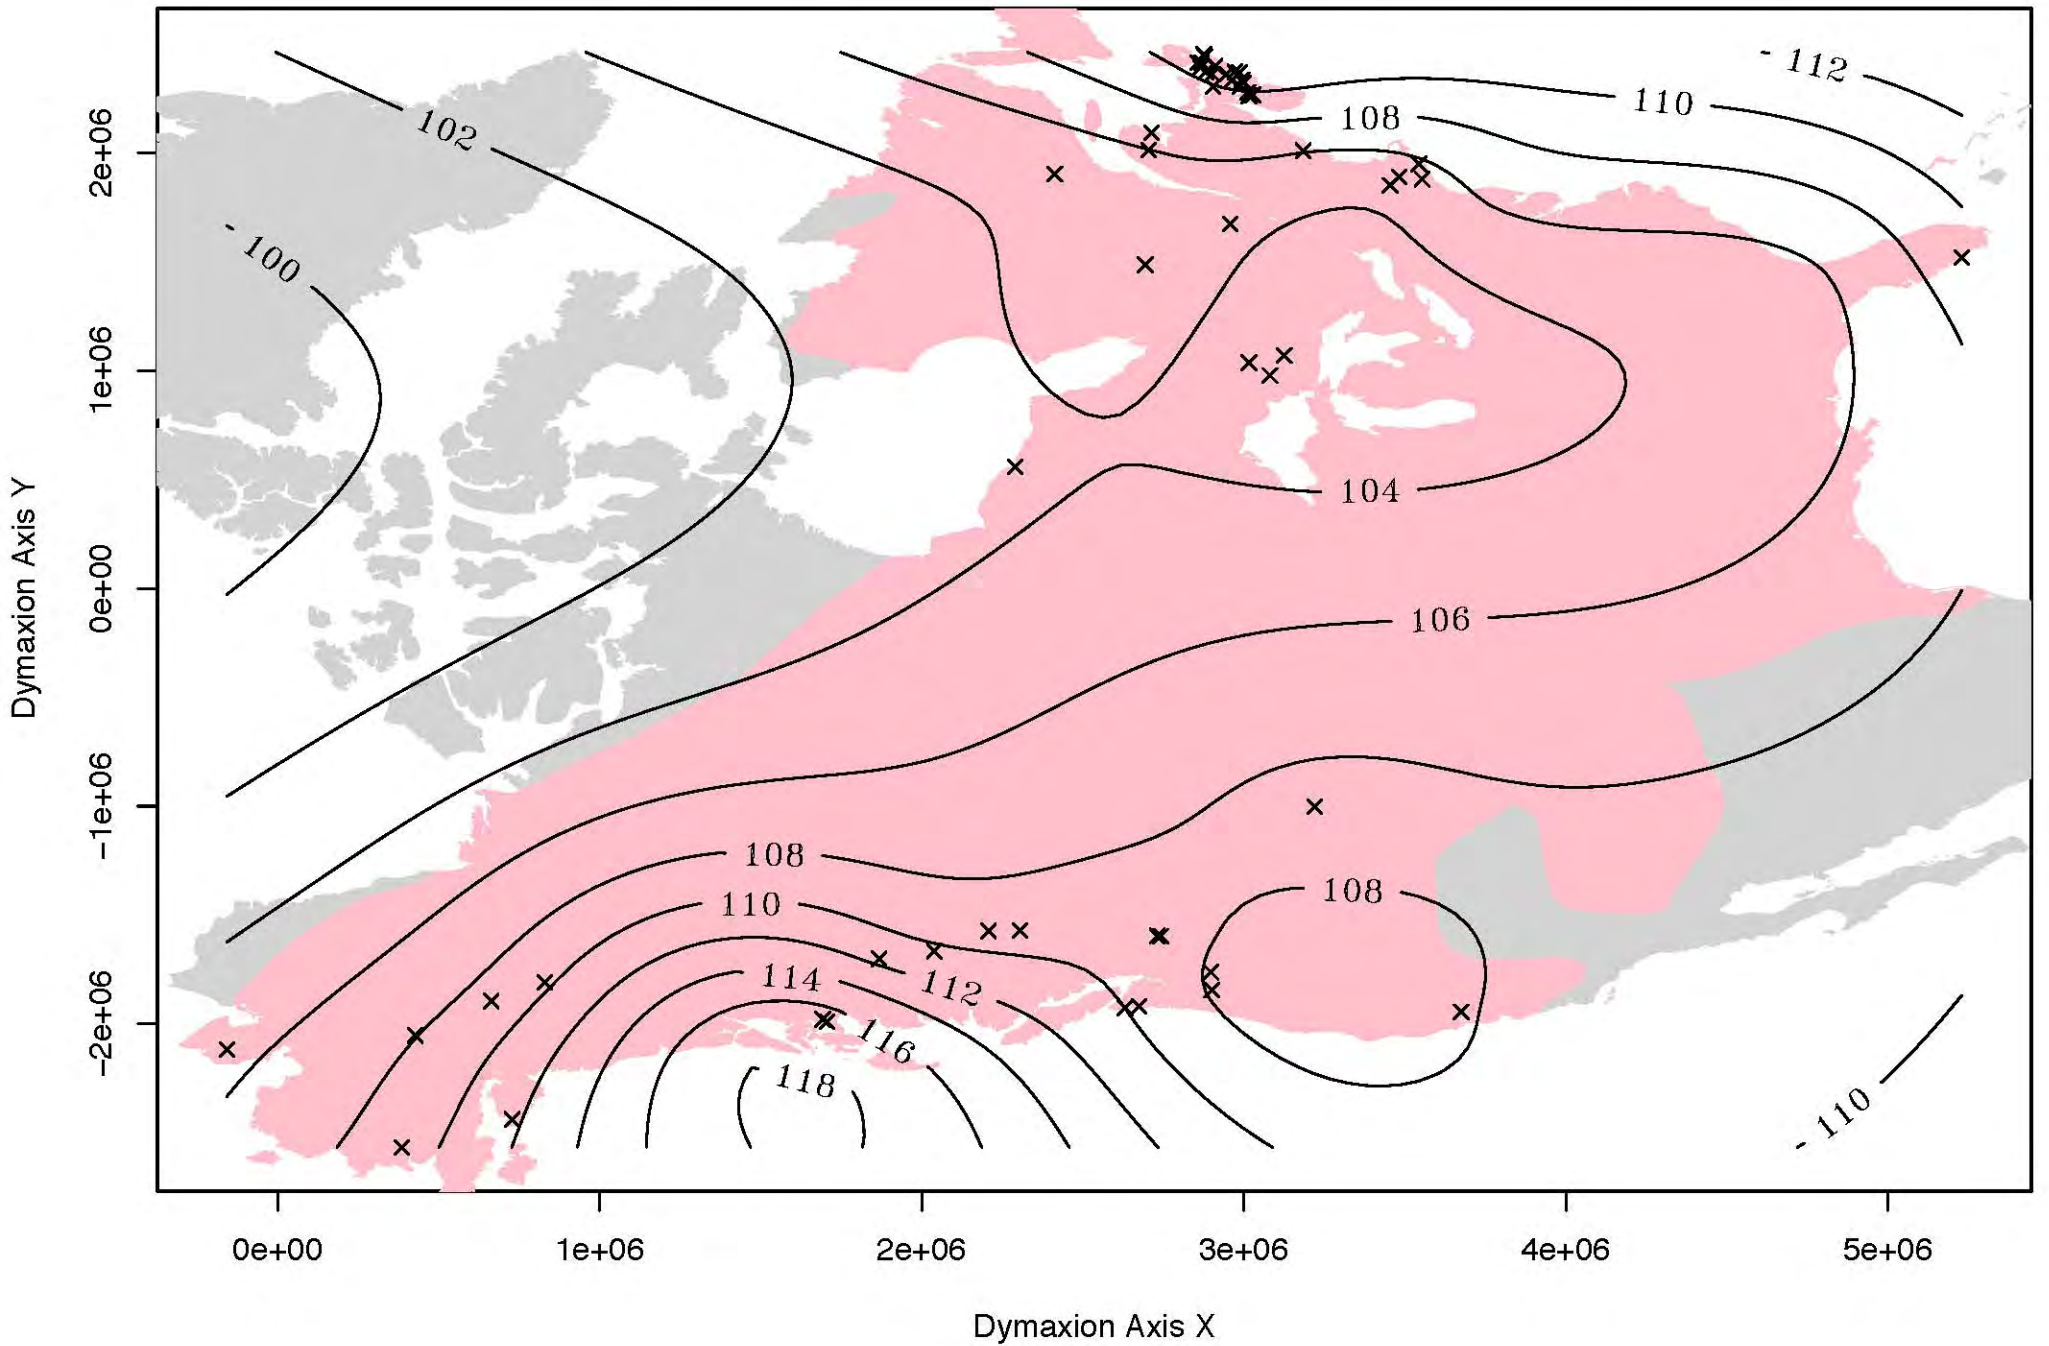

Marginal GAM Surface for CBL in male *Lutra lutra*

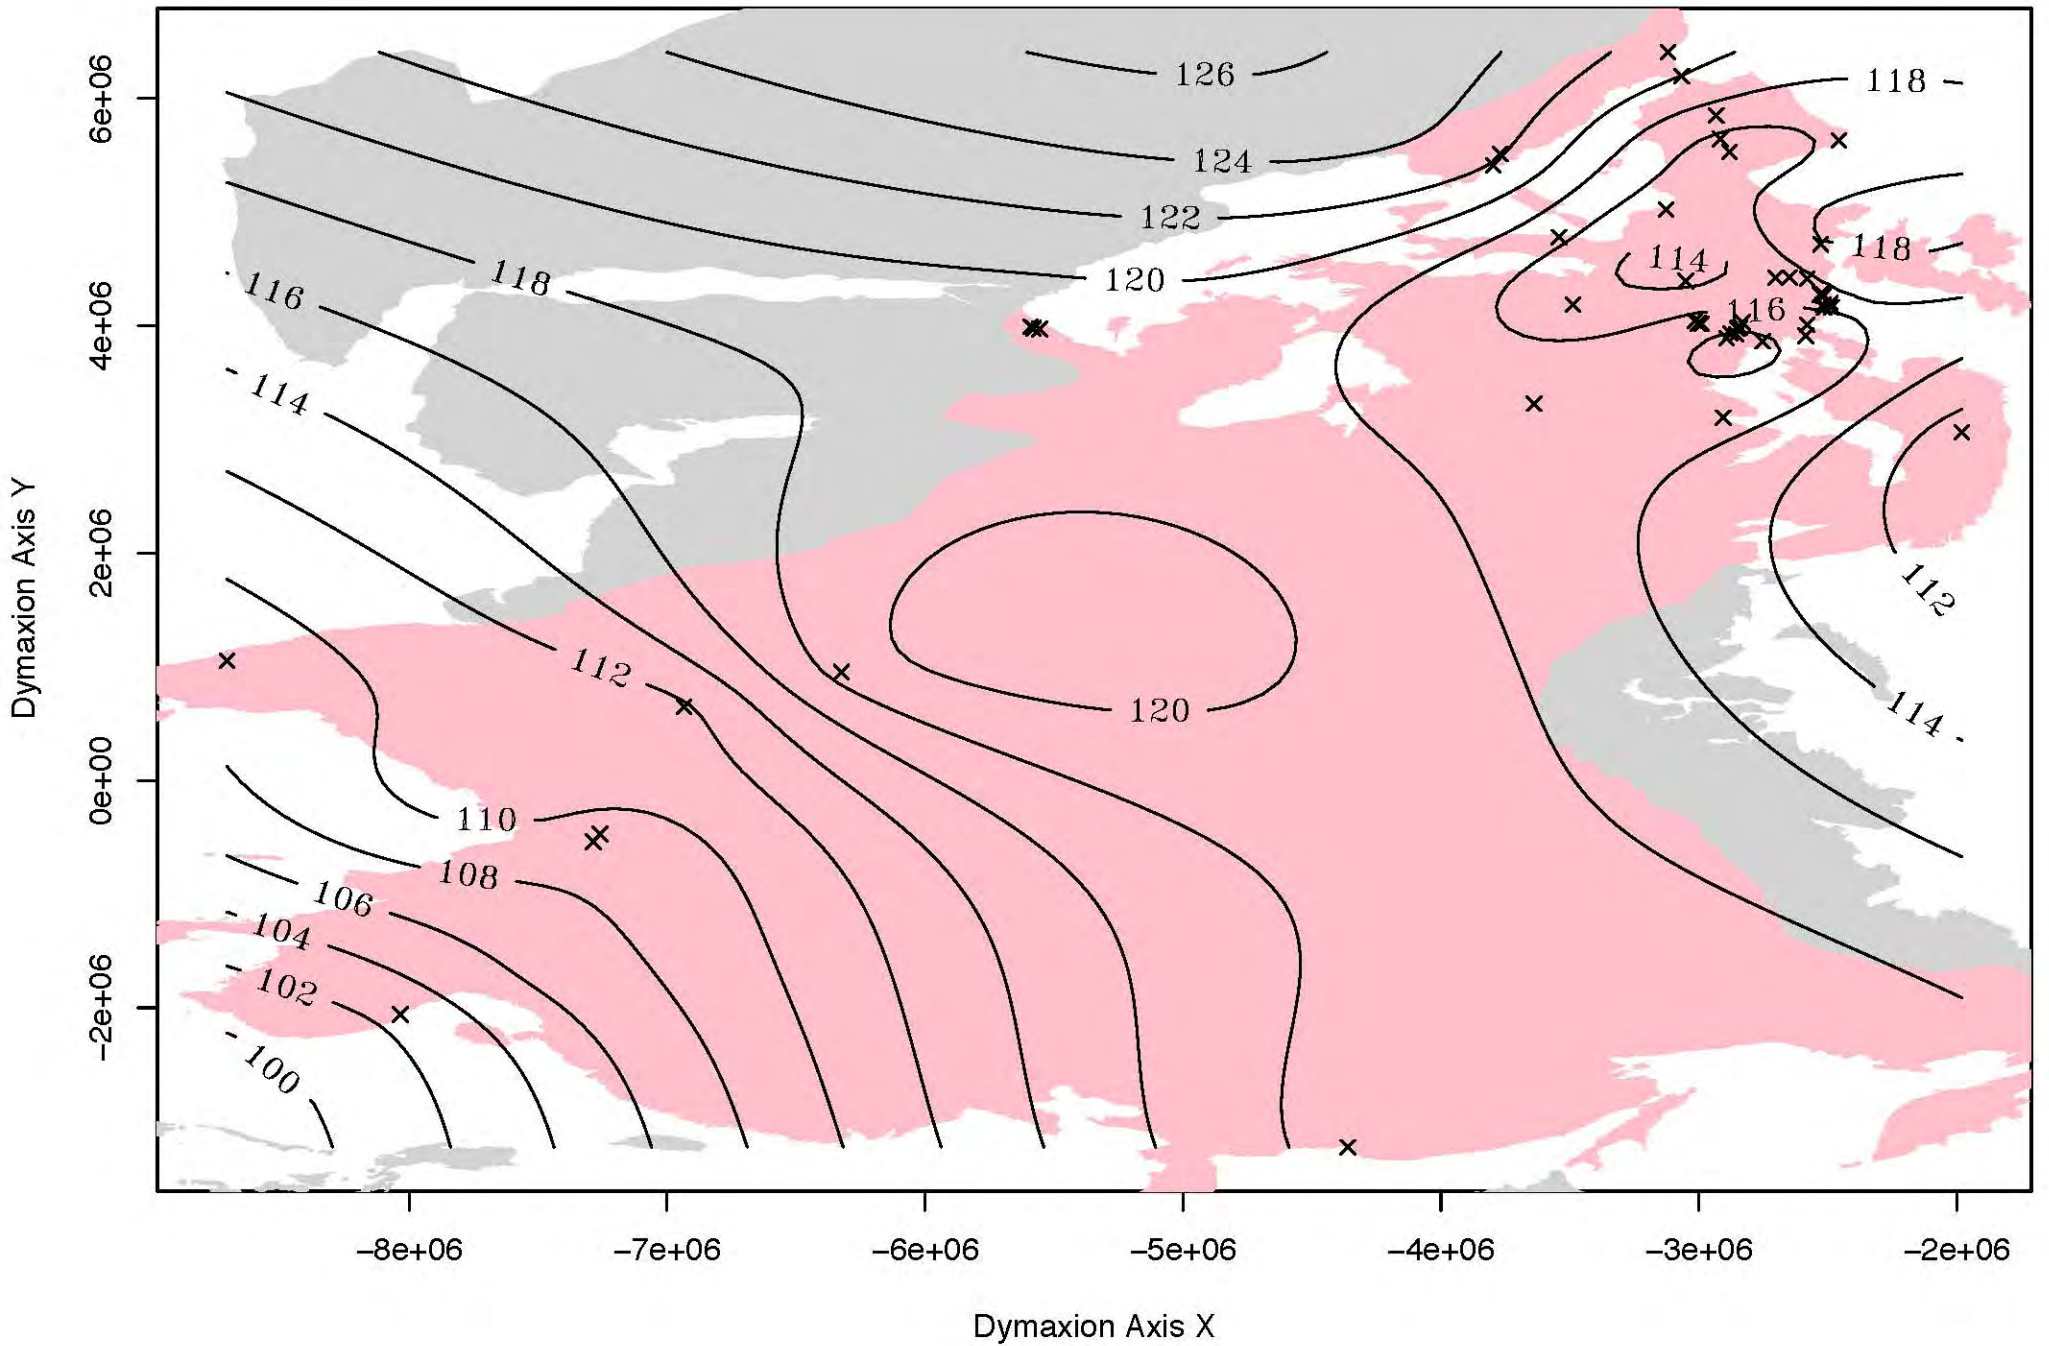



Marginal GAM Surface for CBL in female *Lutra lutra*

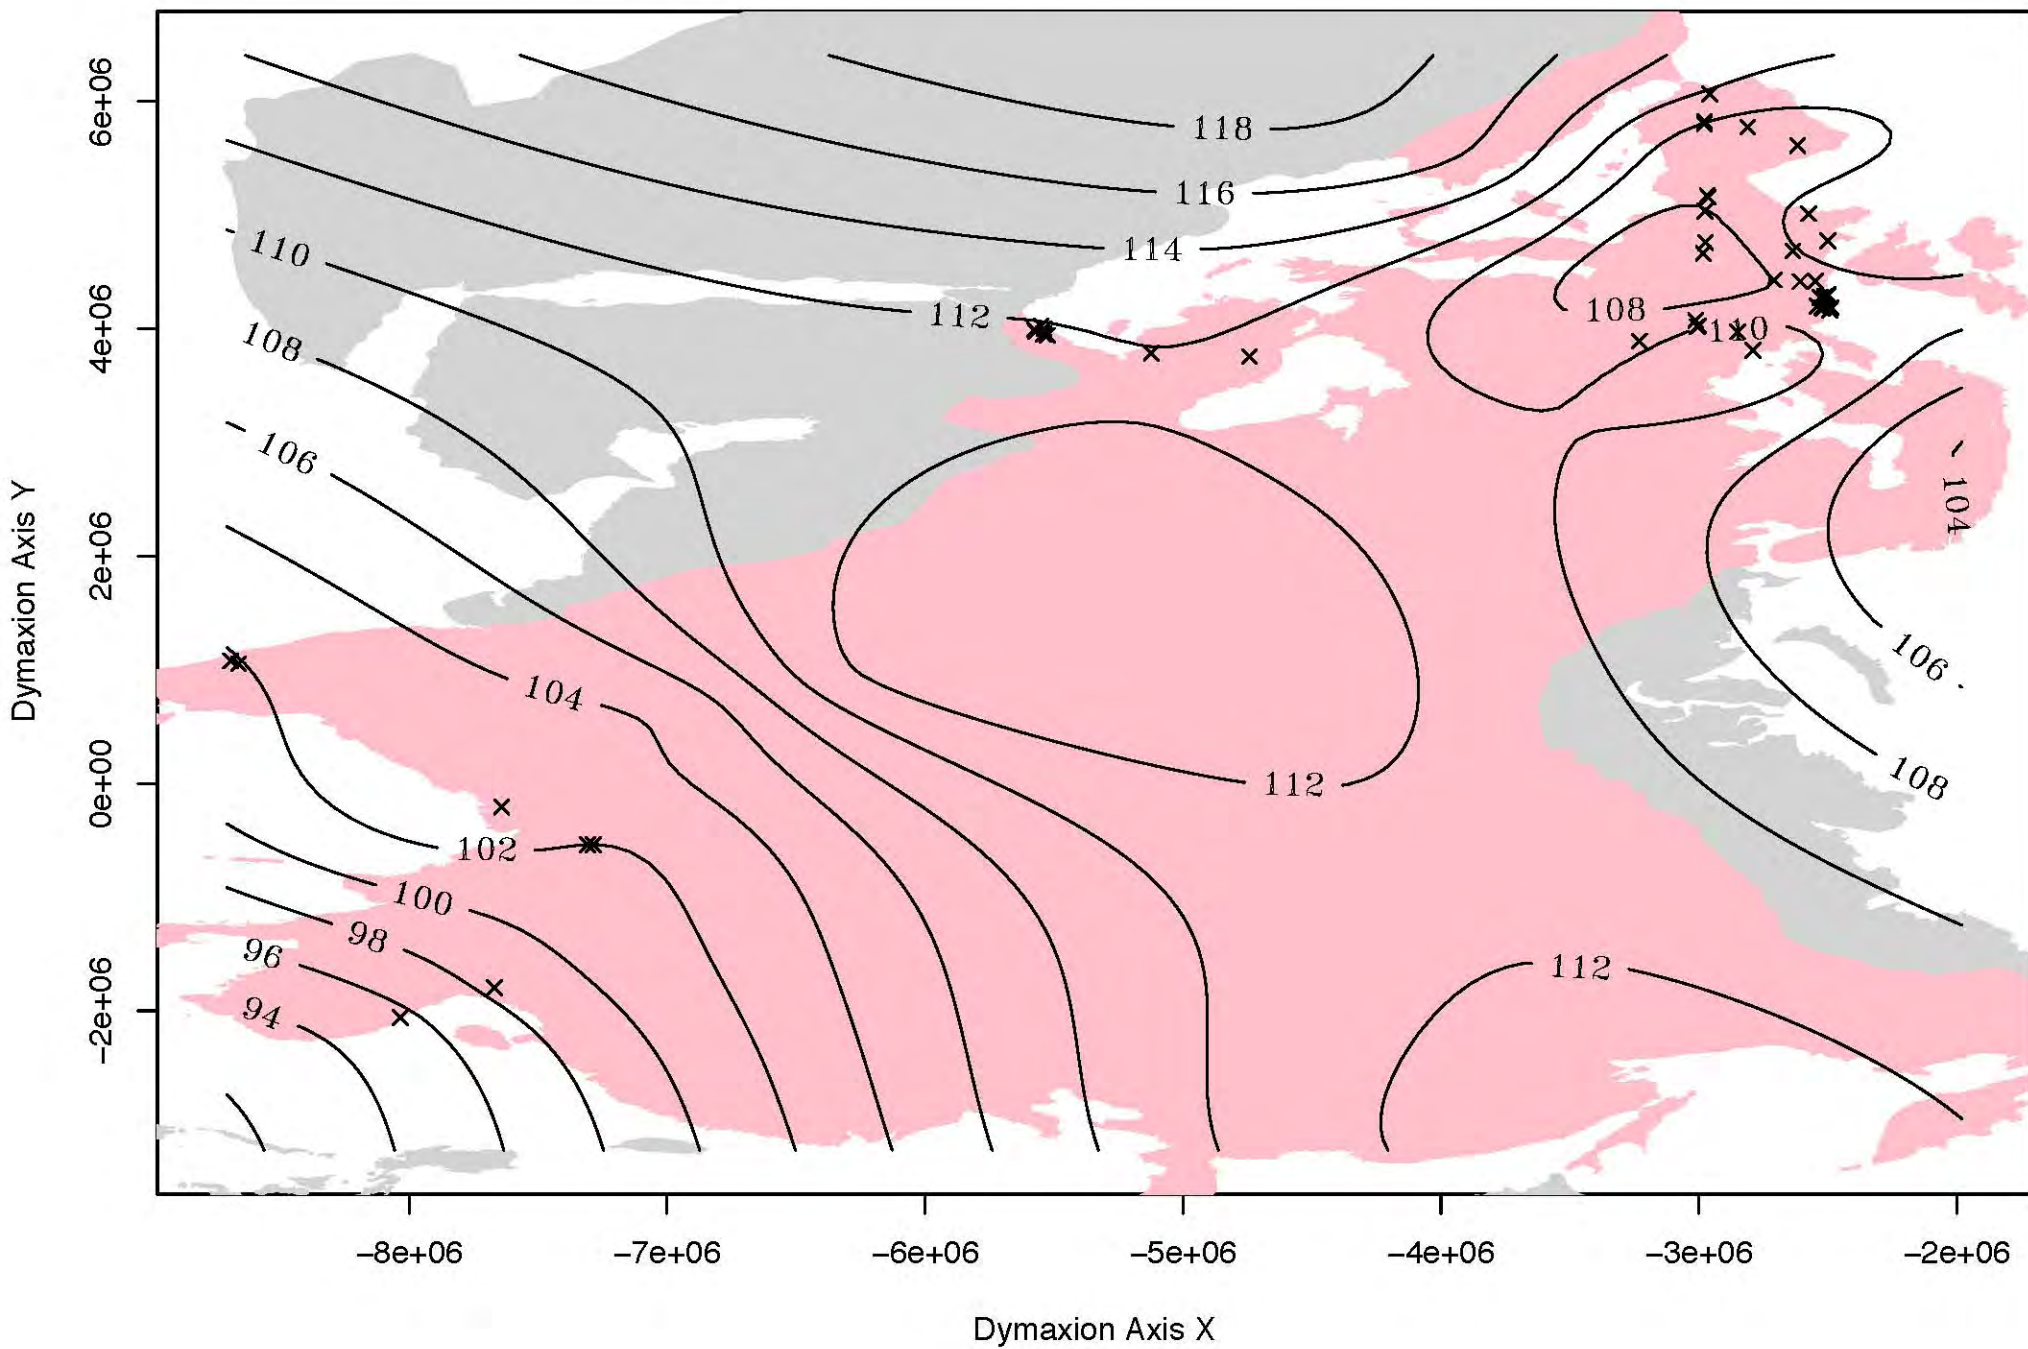

Marginal GAM Surface for CBL in male *Lynx canadensis*

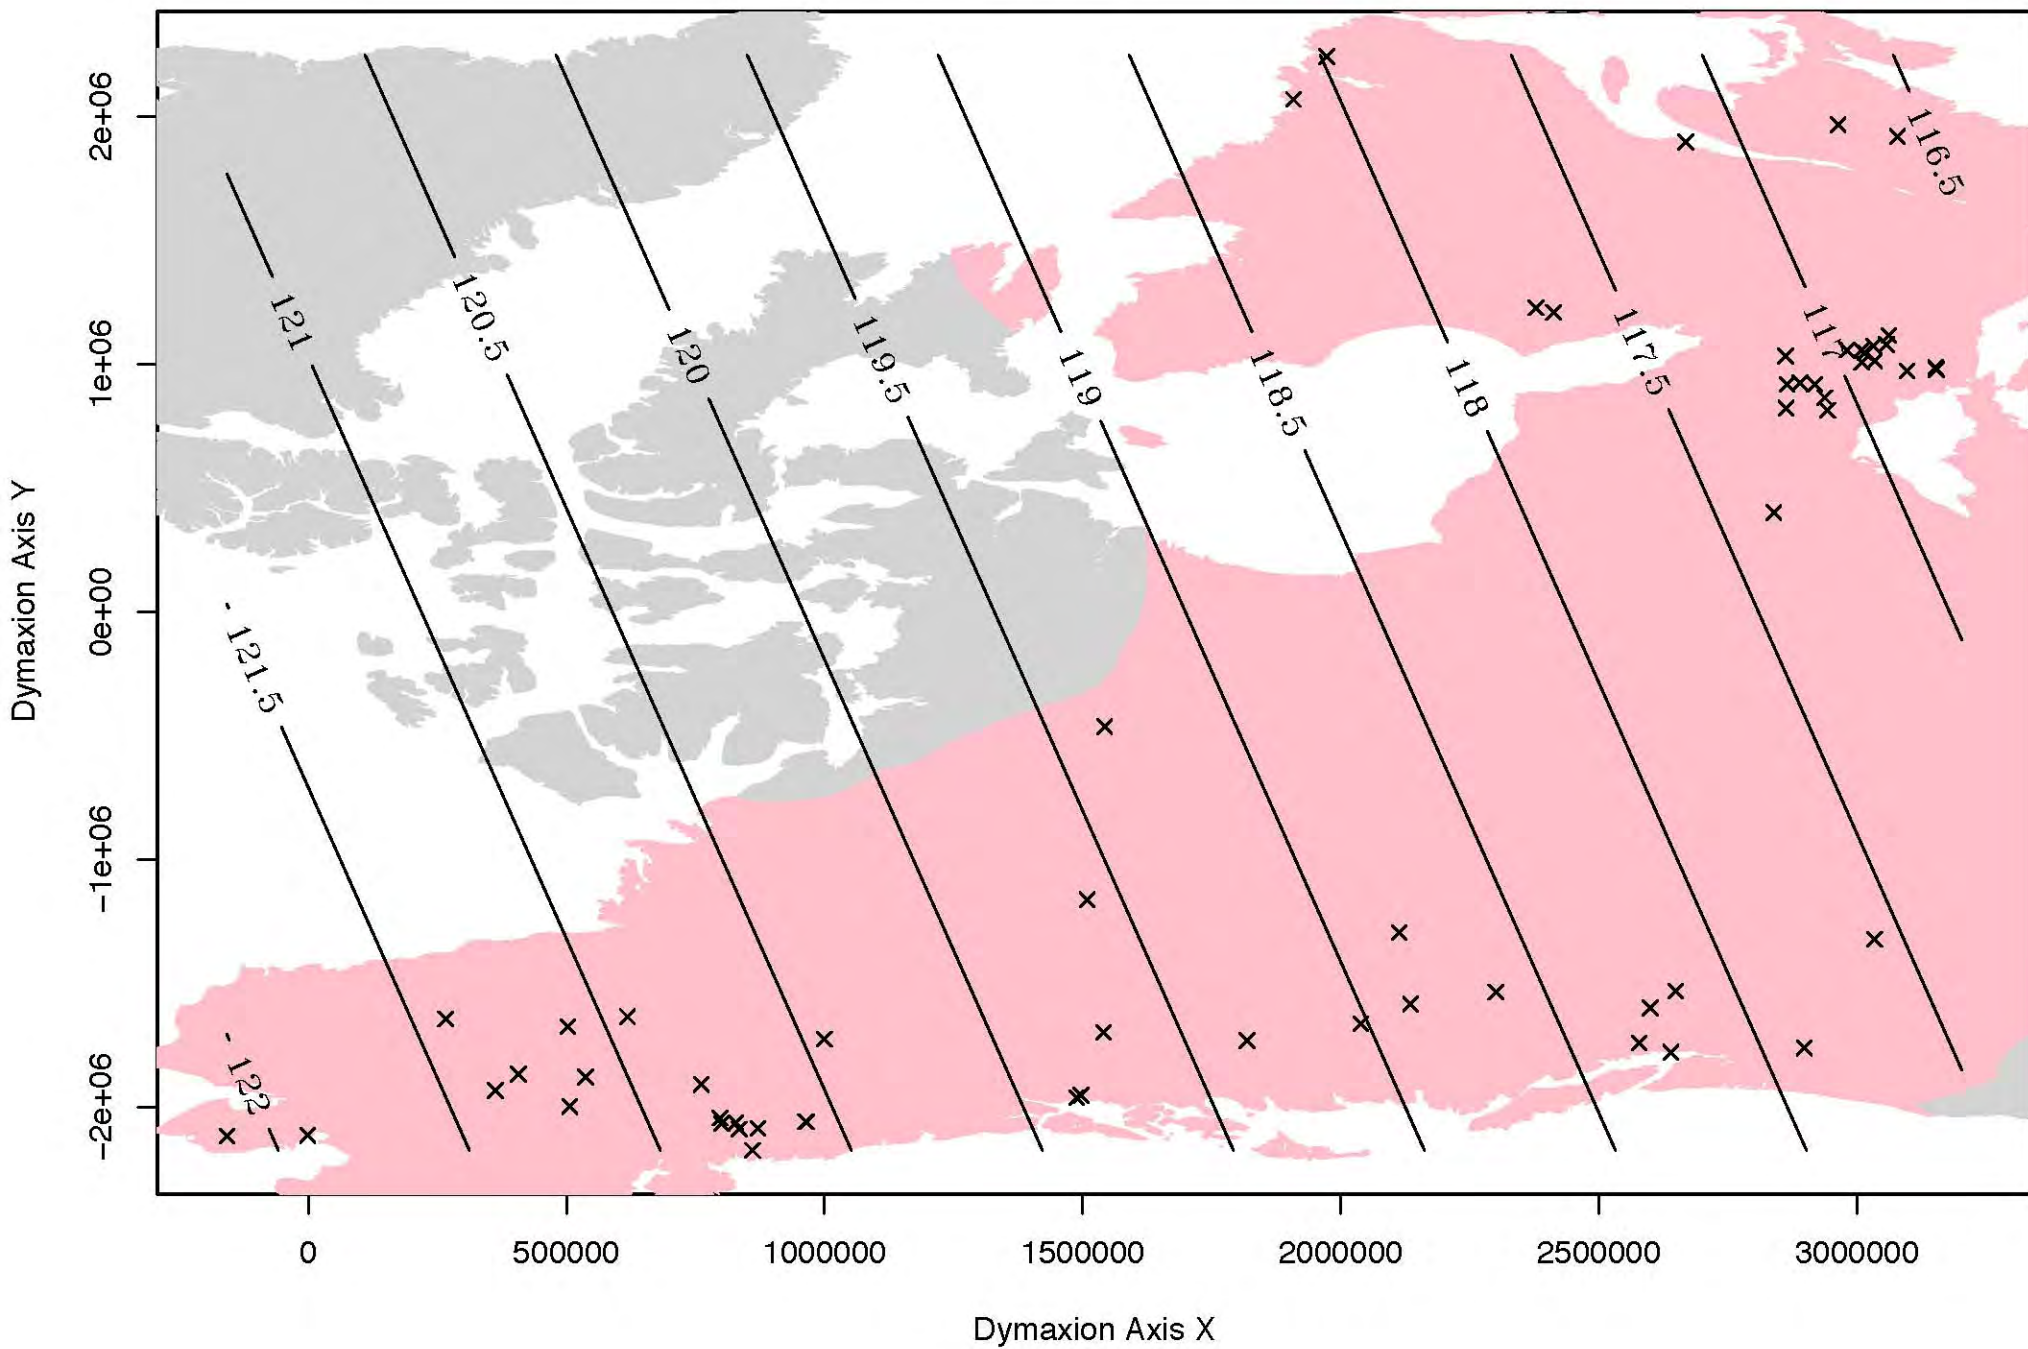



Marginal GAM Surface for CBL in female *Lynx canadensis*

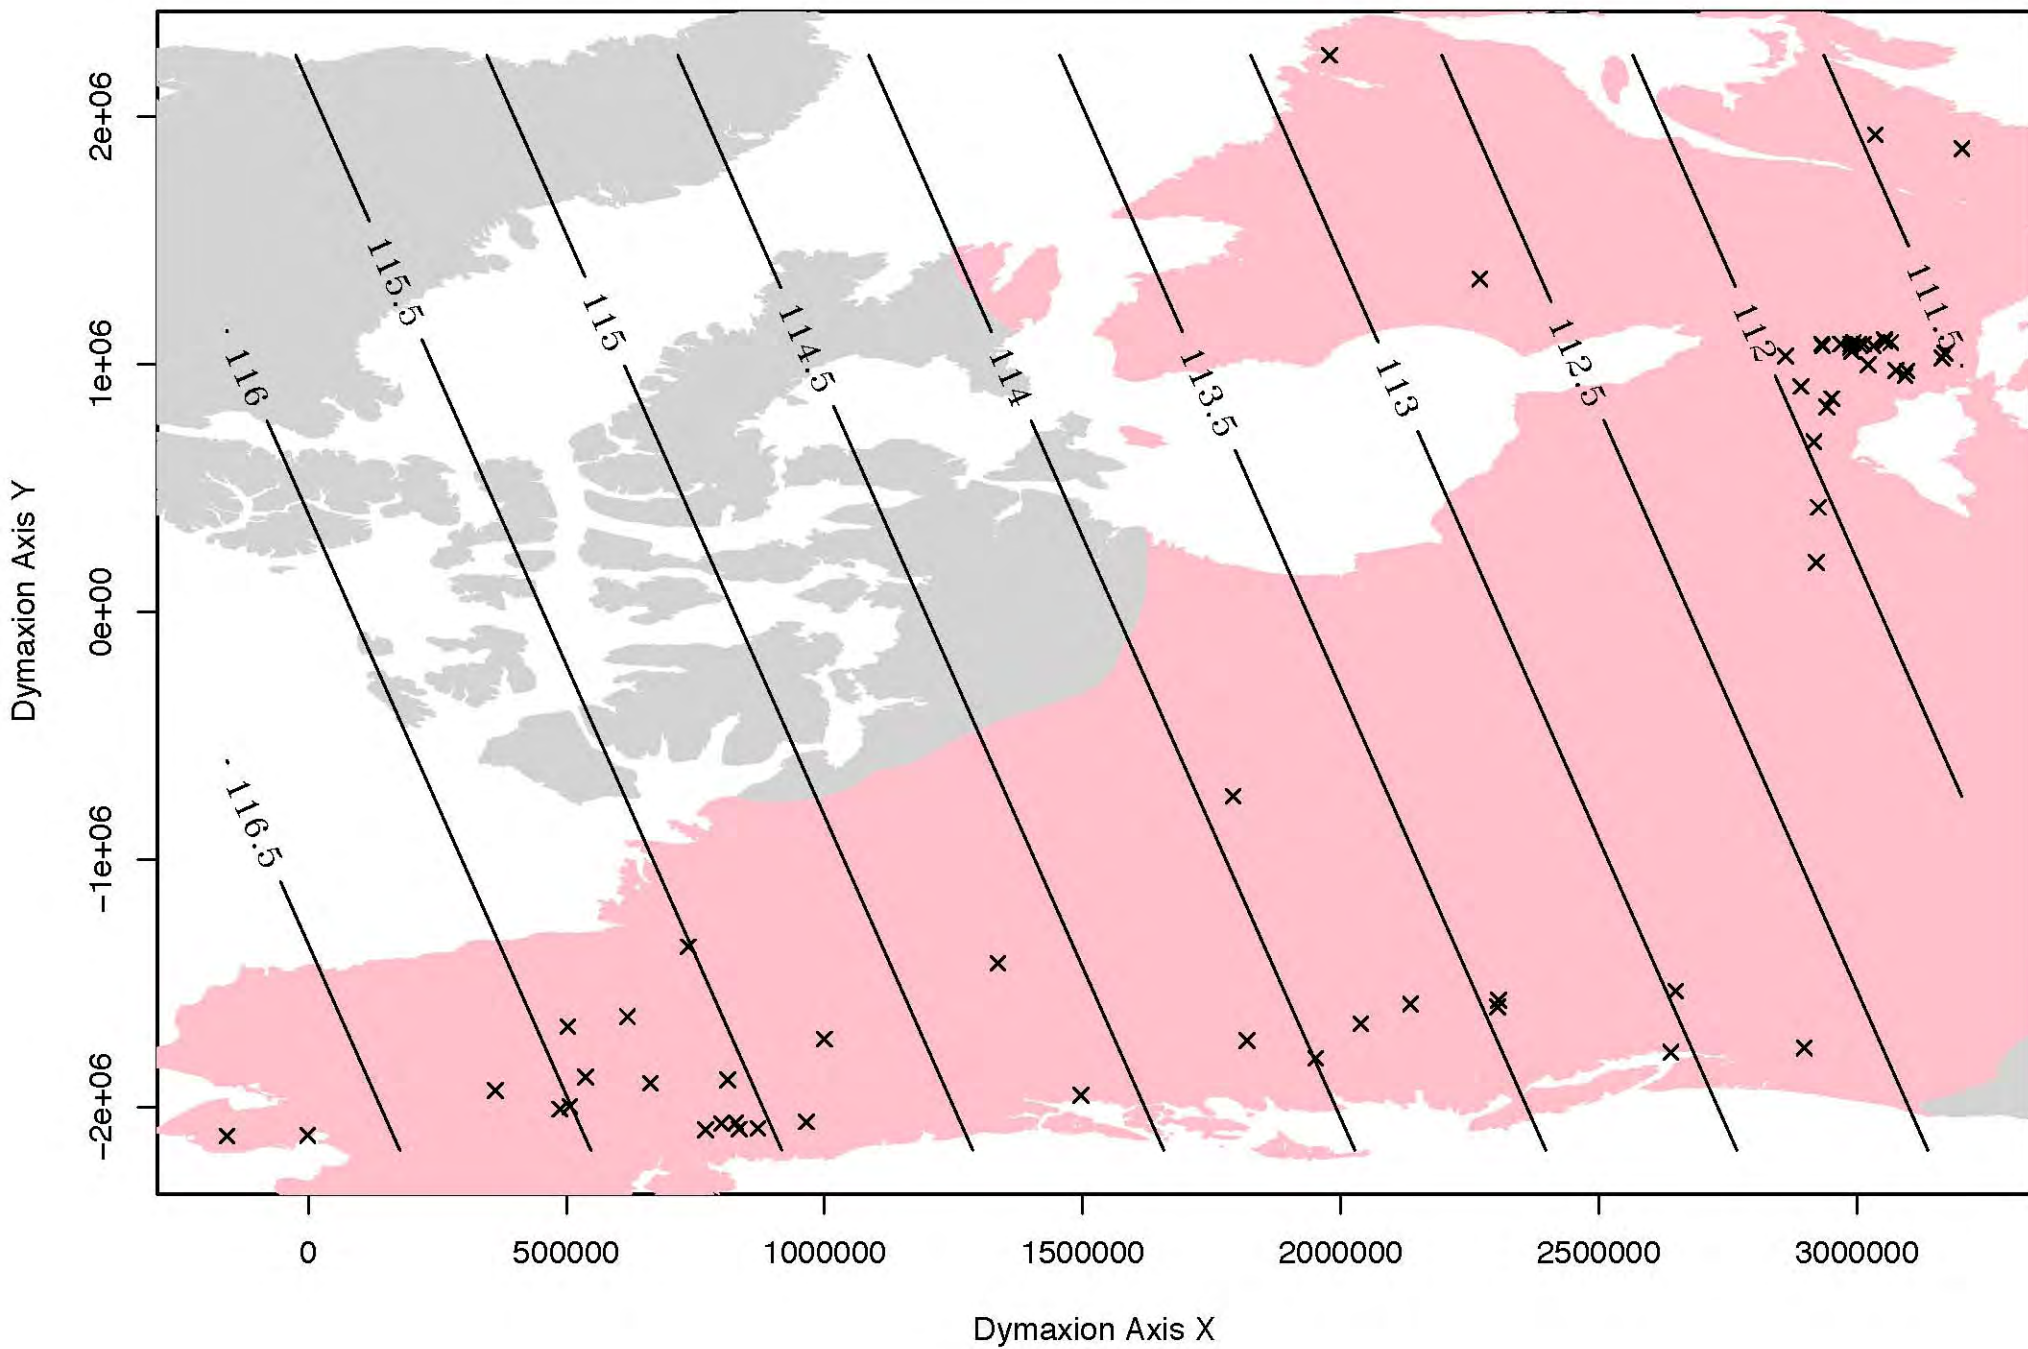

Marginal GAM Surface for CBL in male *Martes americana*

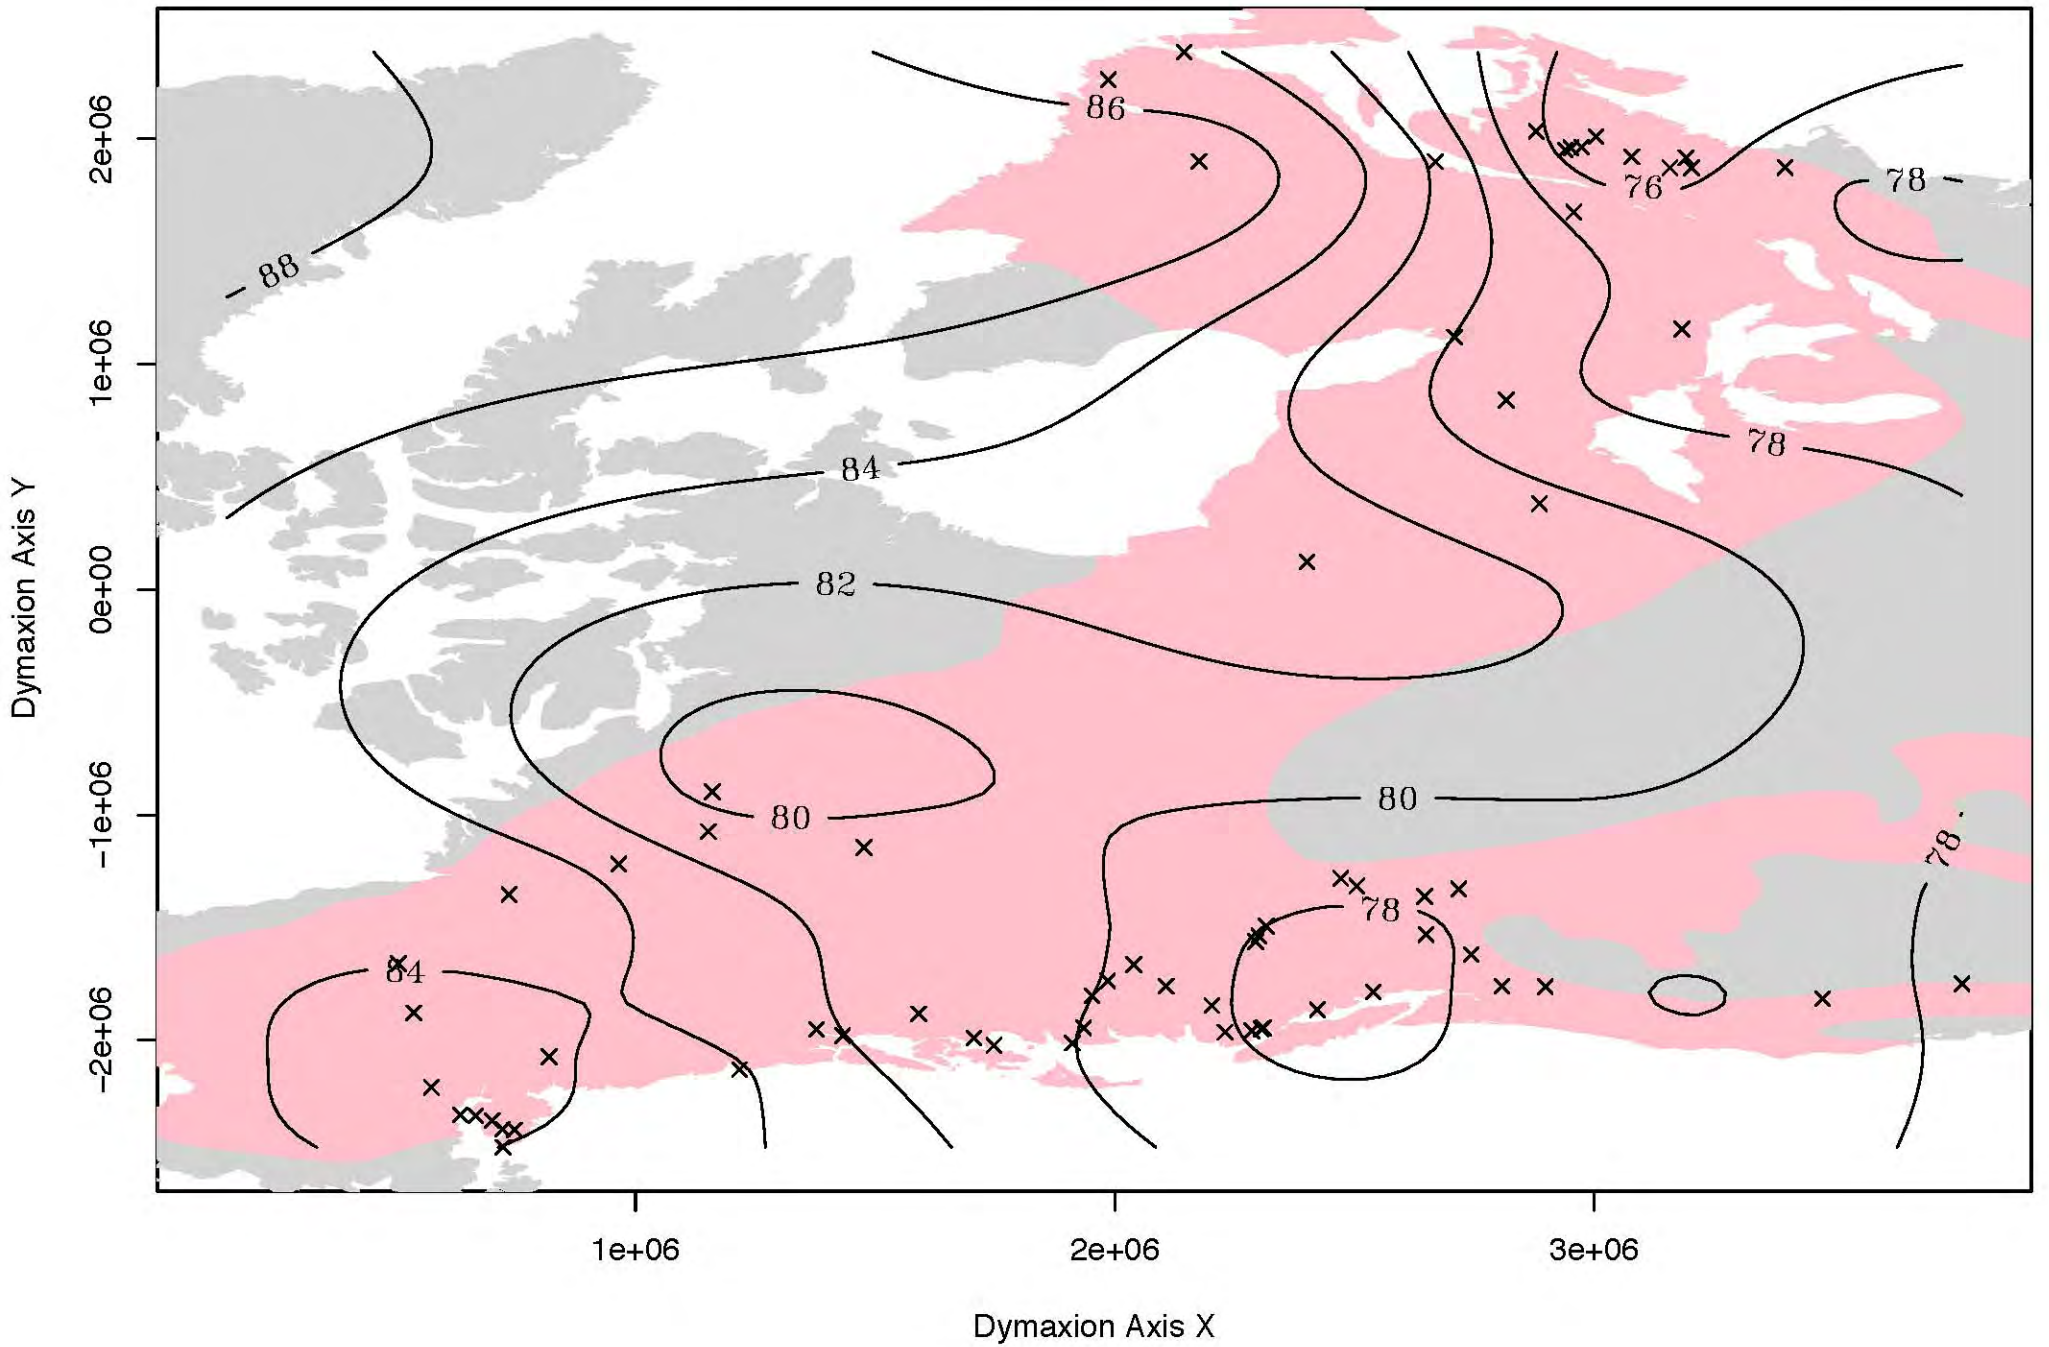



Marginal GAM Surface for CBL in female *Martes americana*

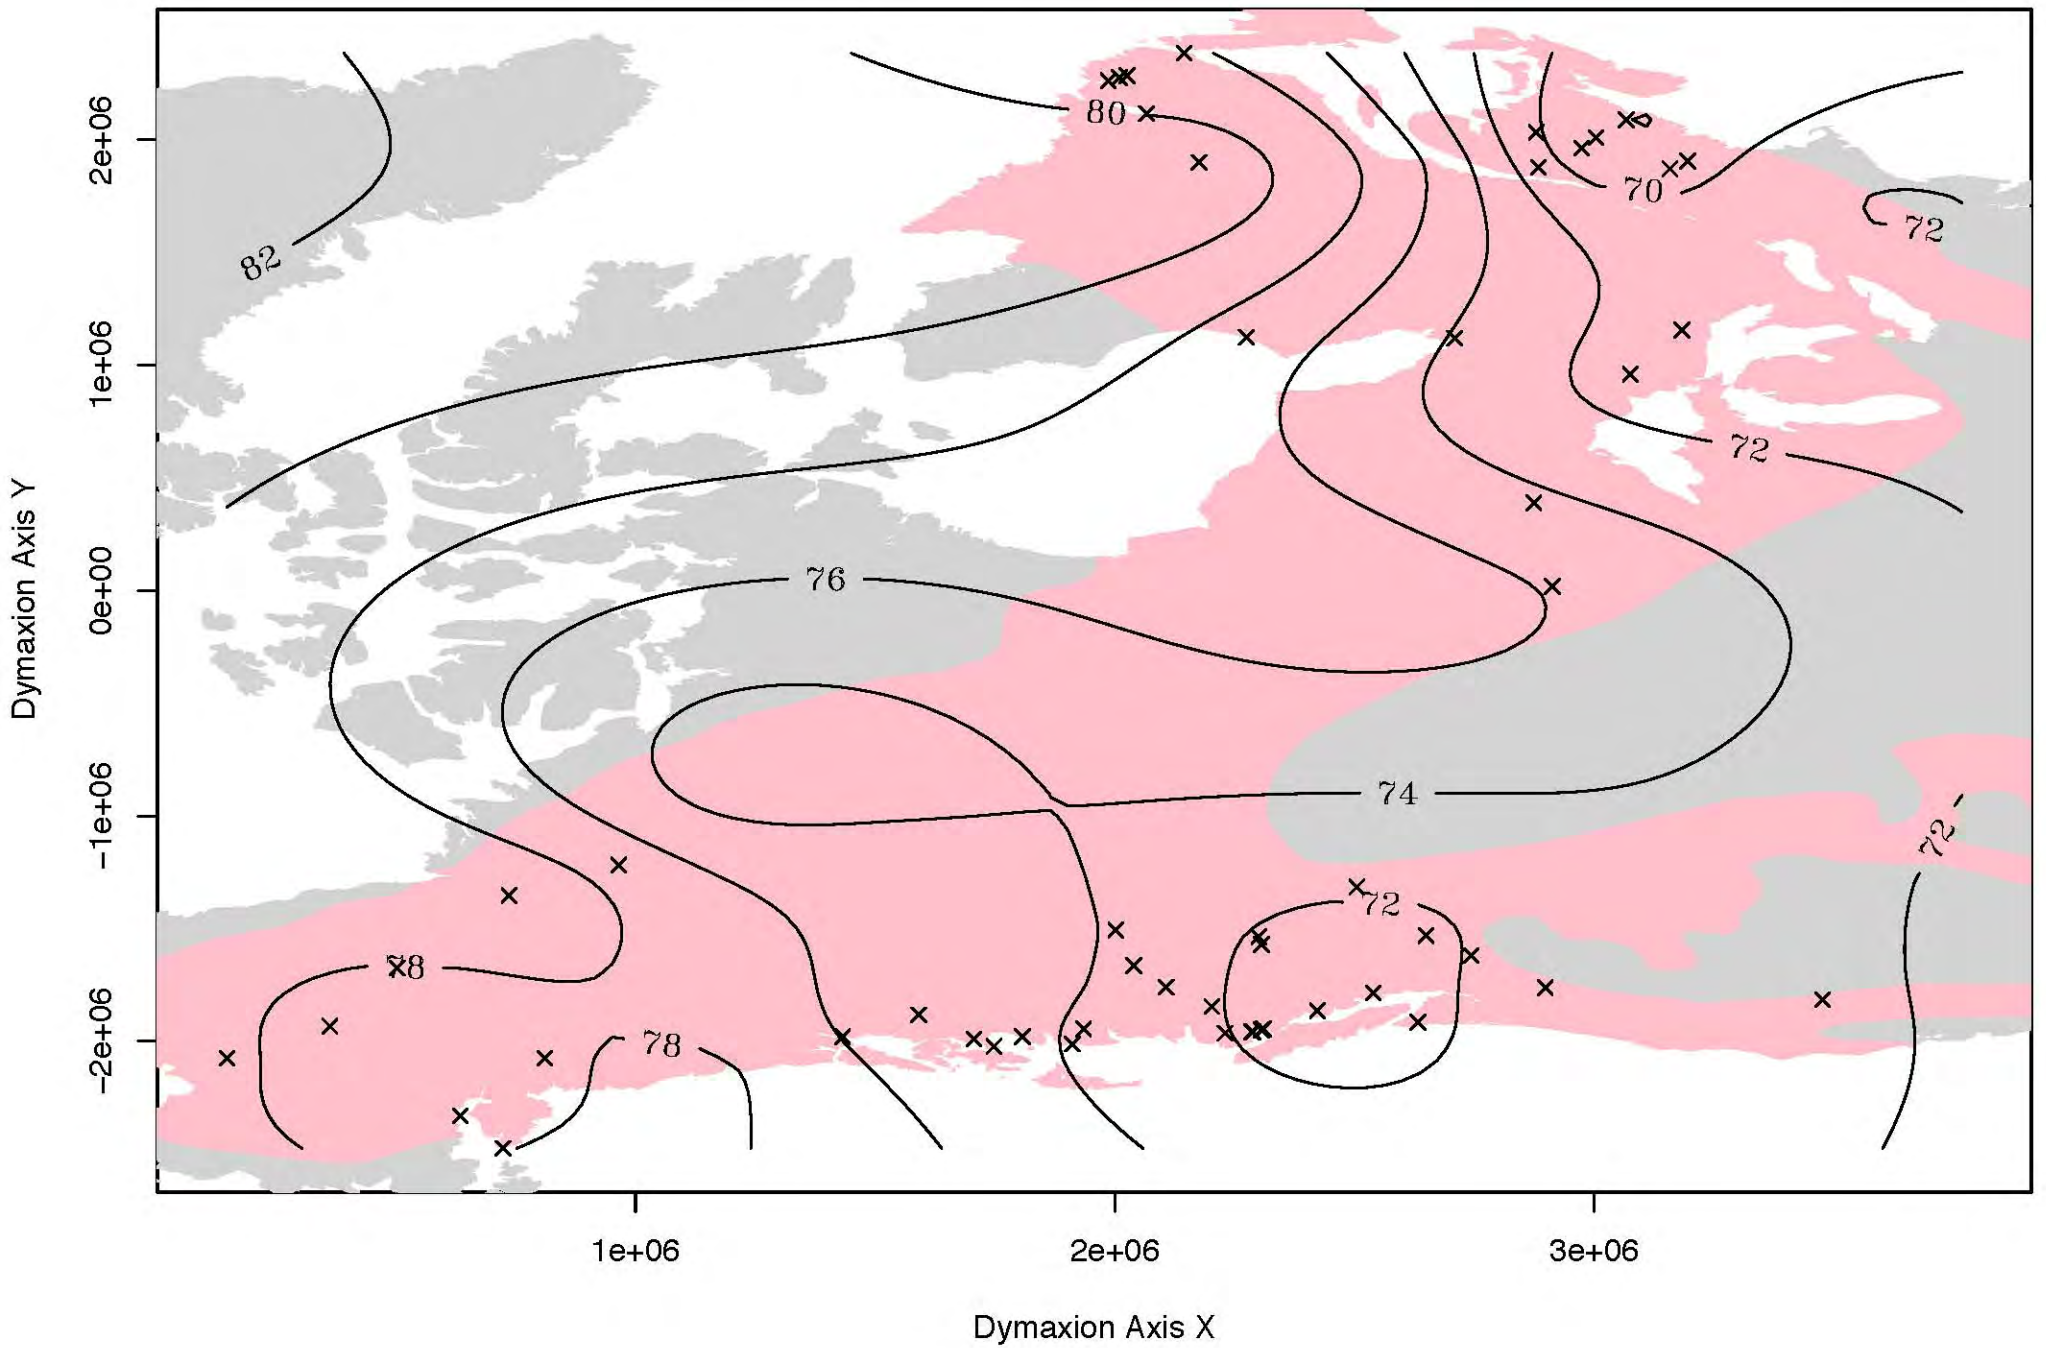

Marginal GAM Surface for CBL in male *Martes foina*

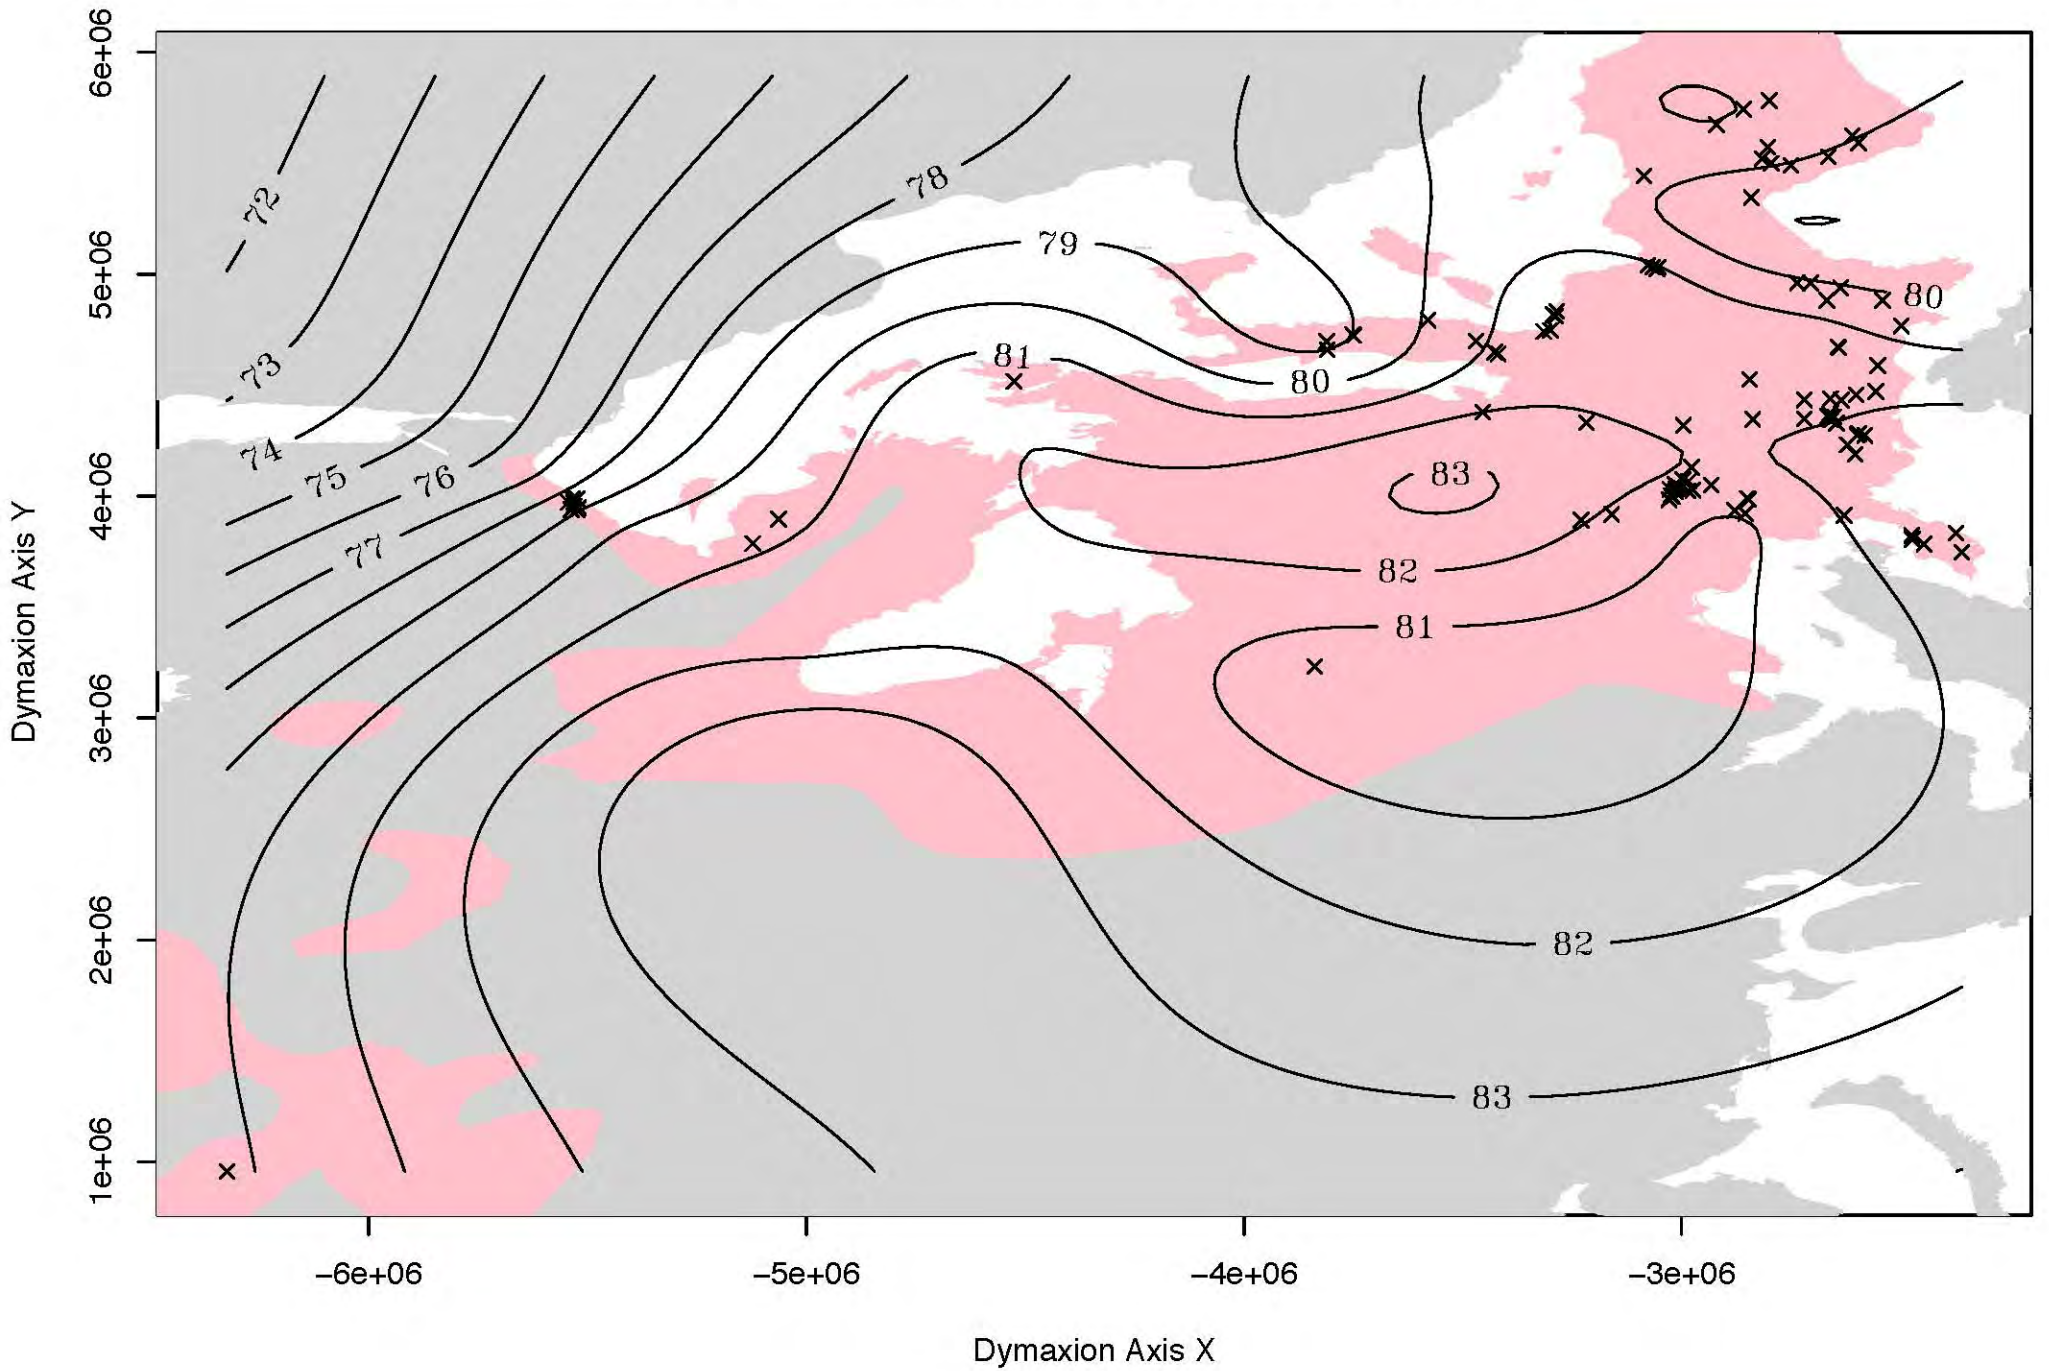



Marginal GAM Surface for CBL in female *Martes foina*

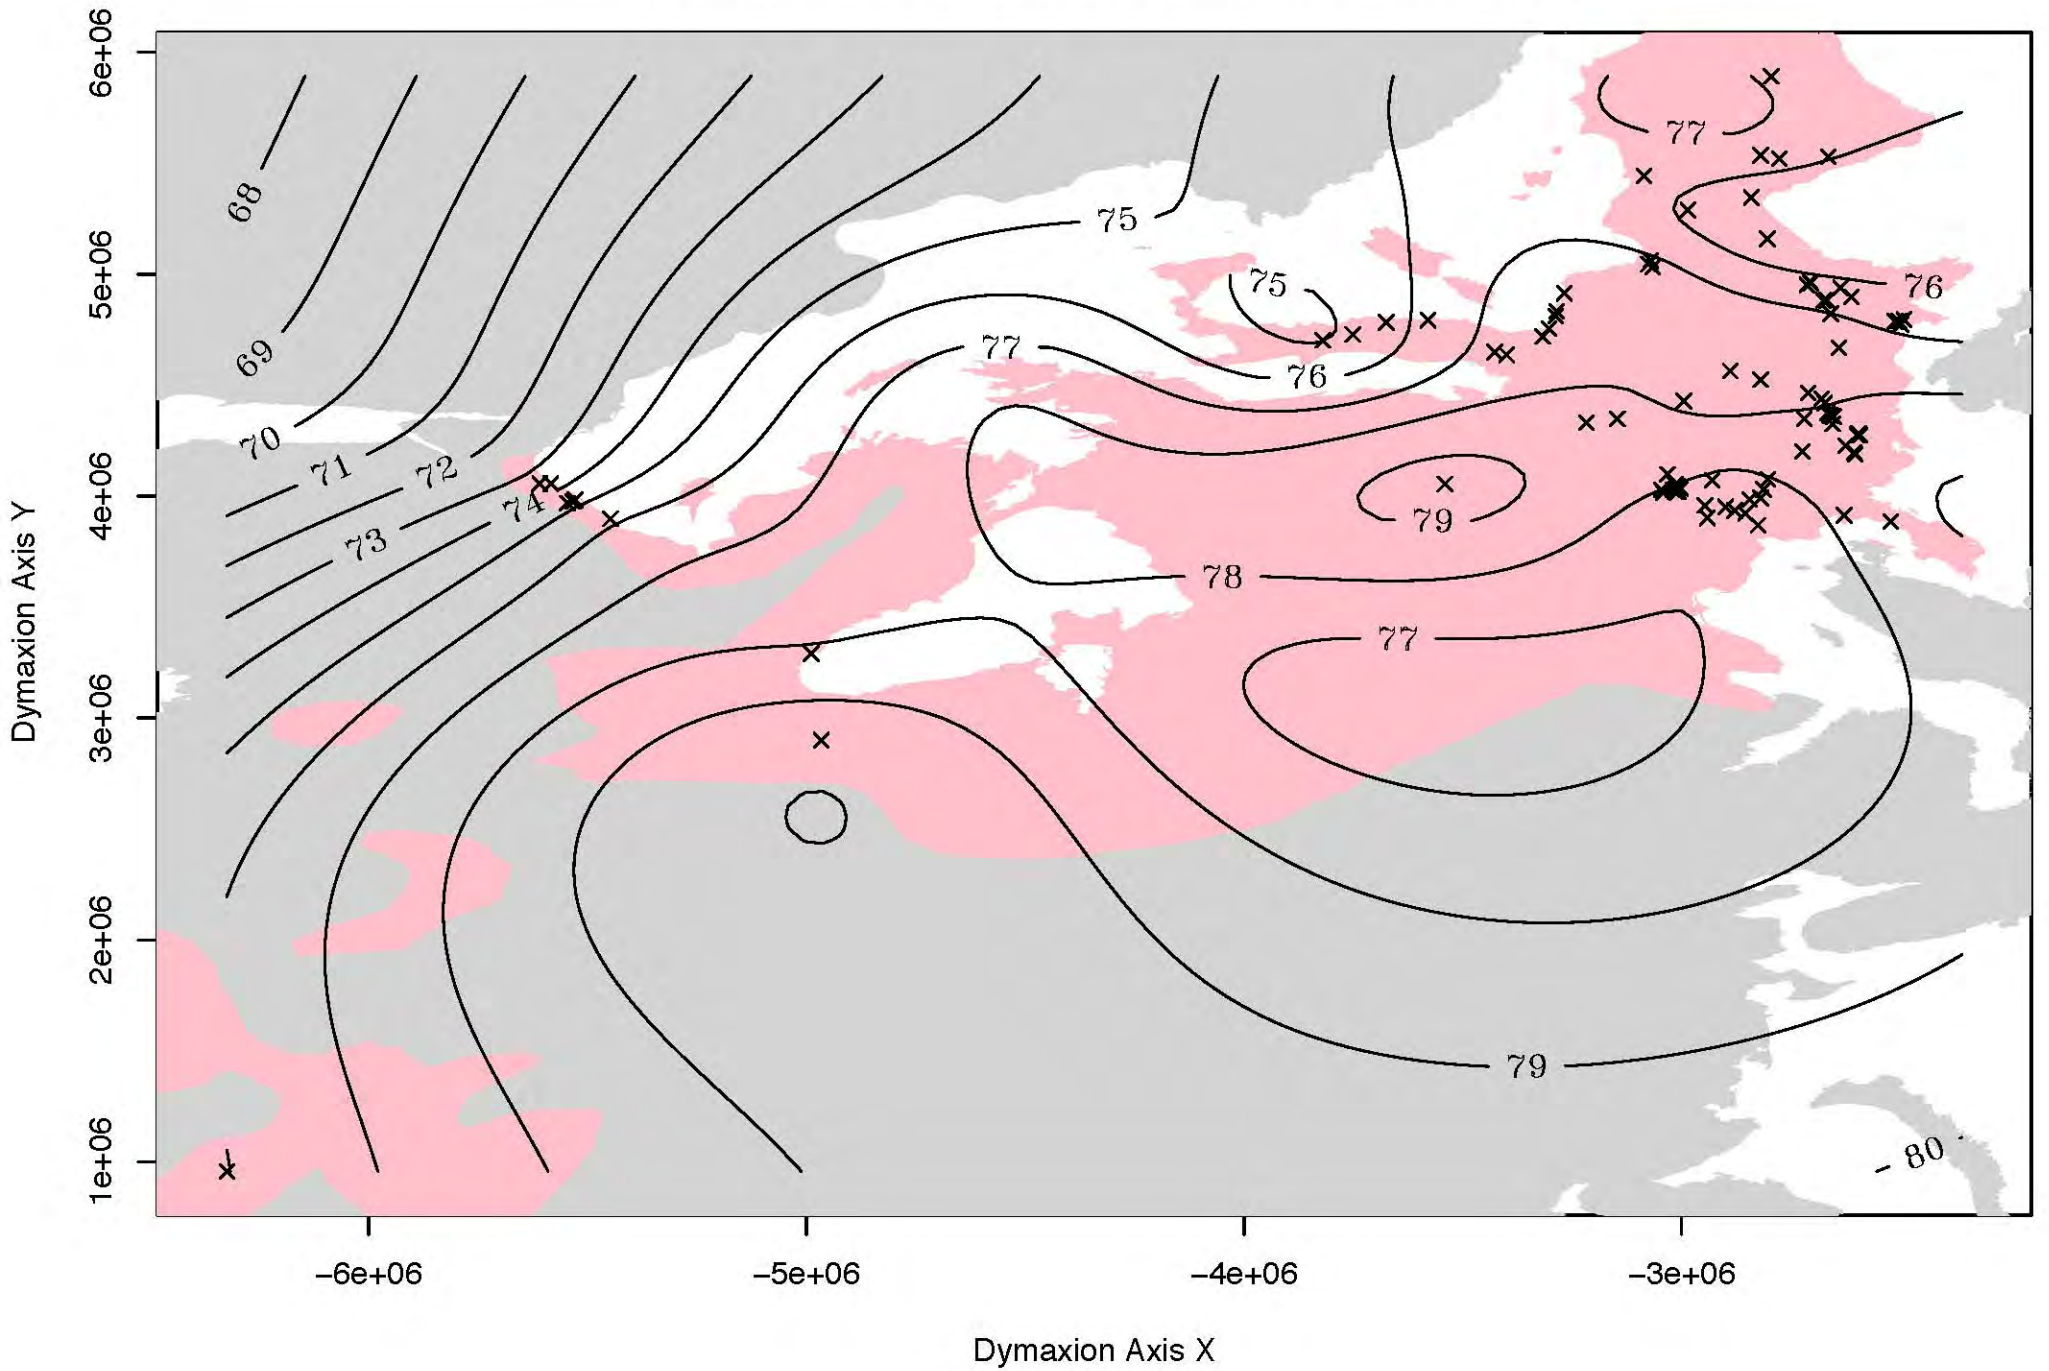

Marginal GAM Surface for CBL in male *Martes martes*

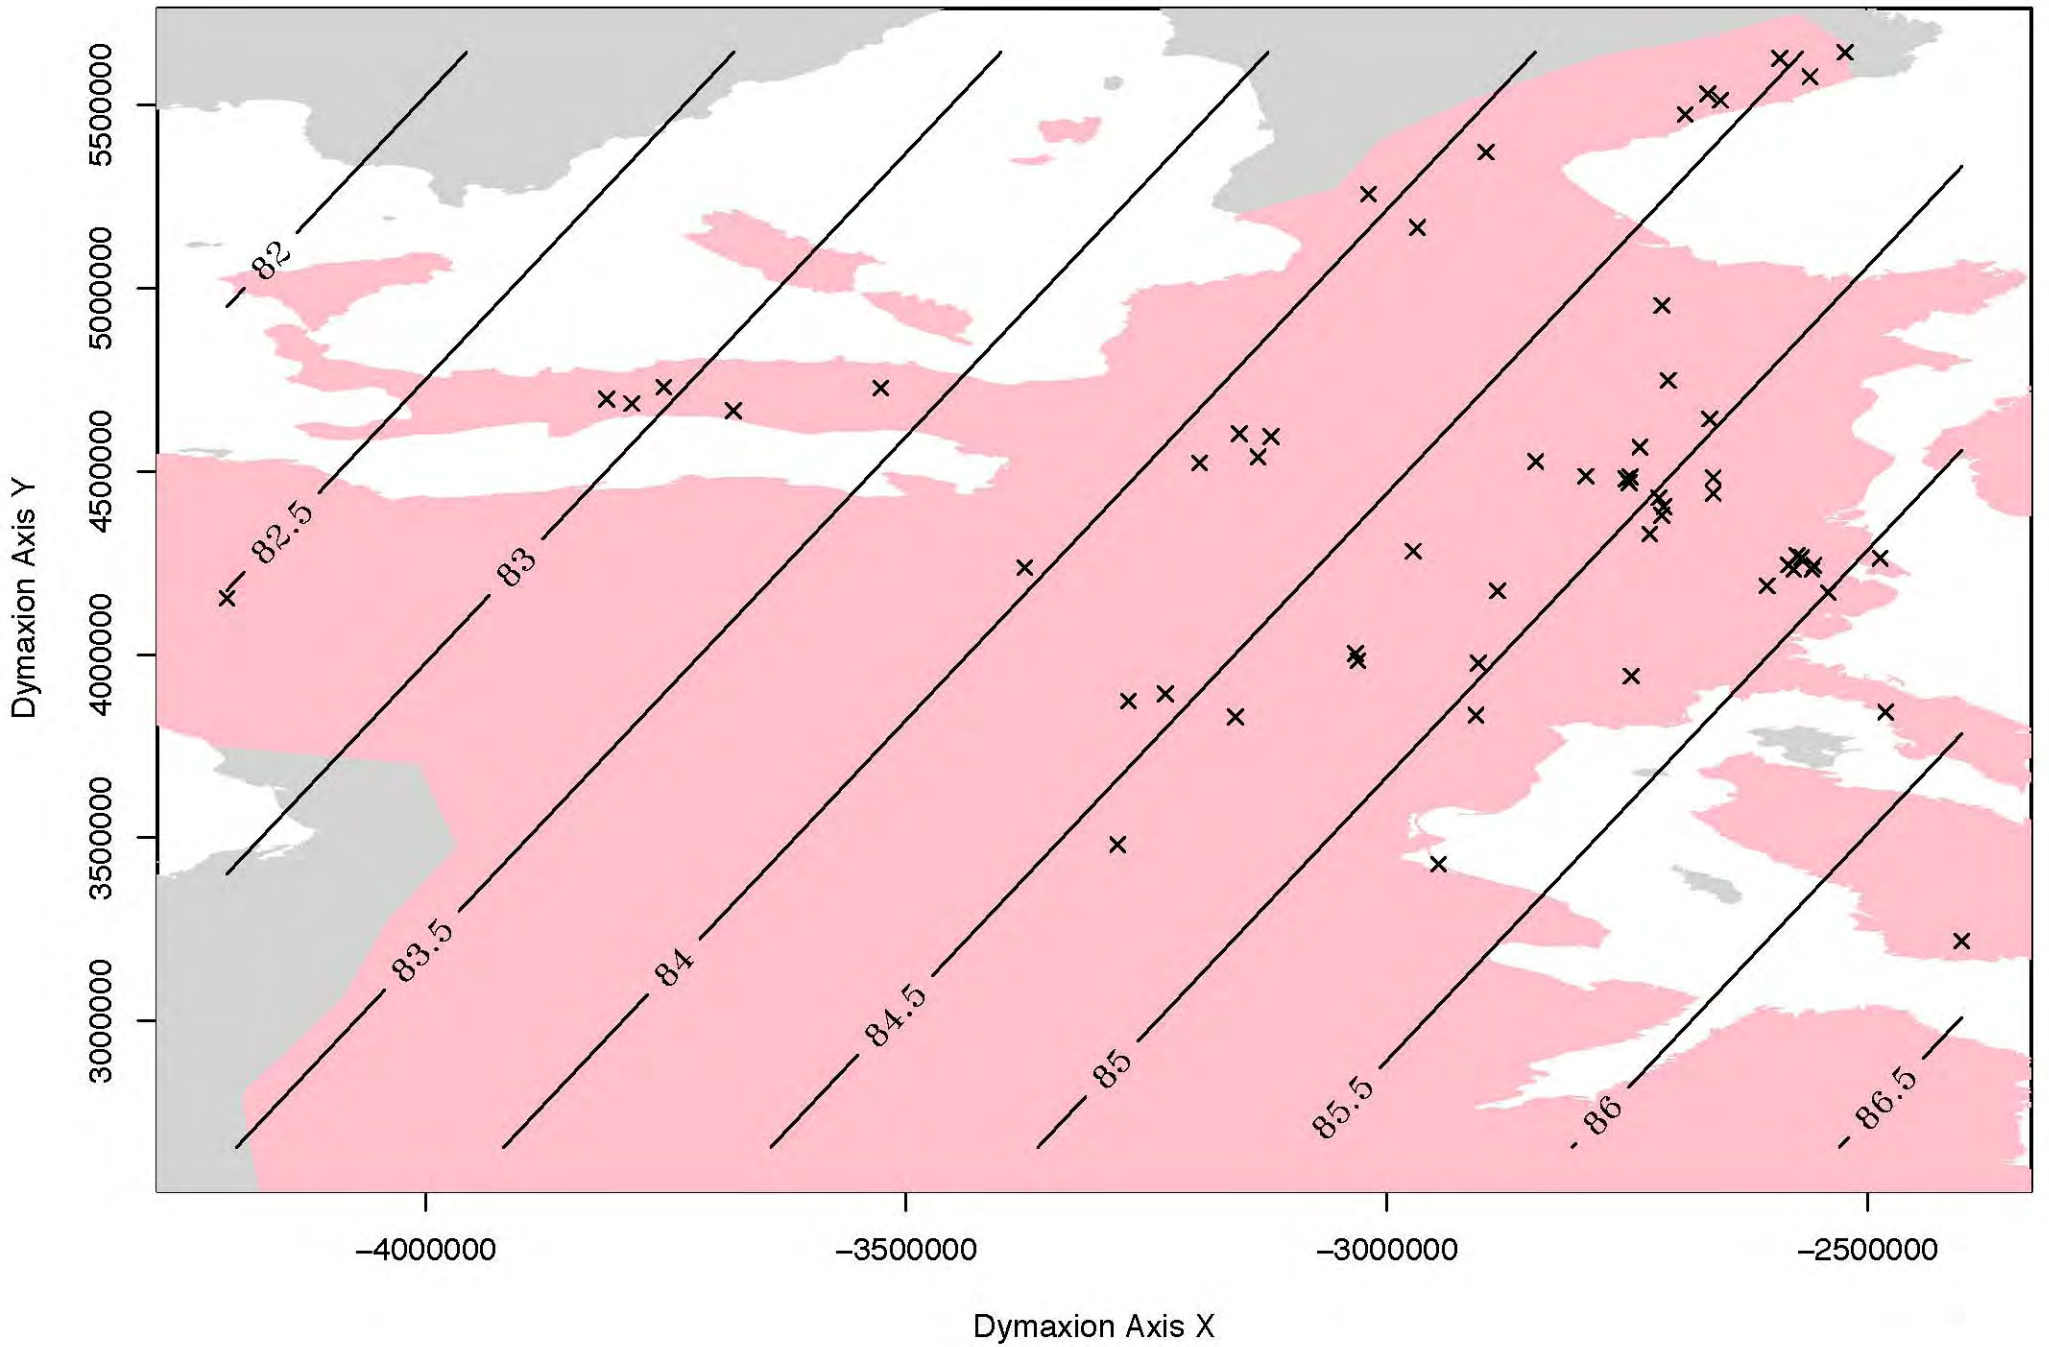



Marginal GAM Surface for CBL in female *Martes martes*

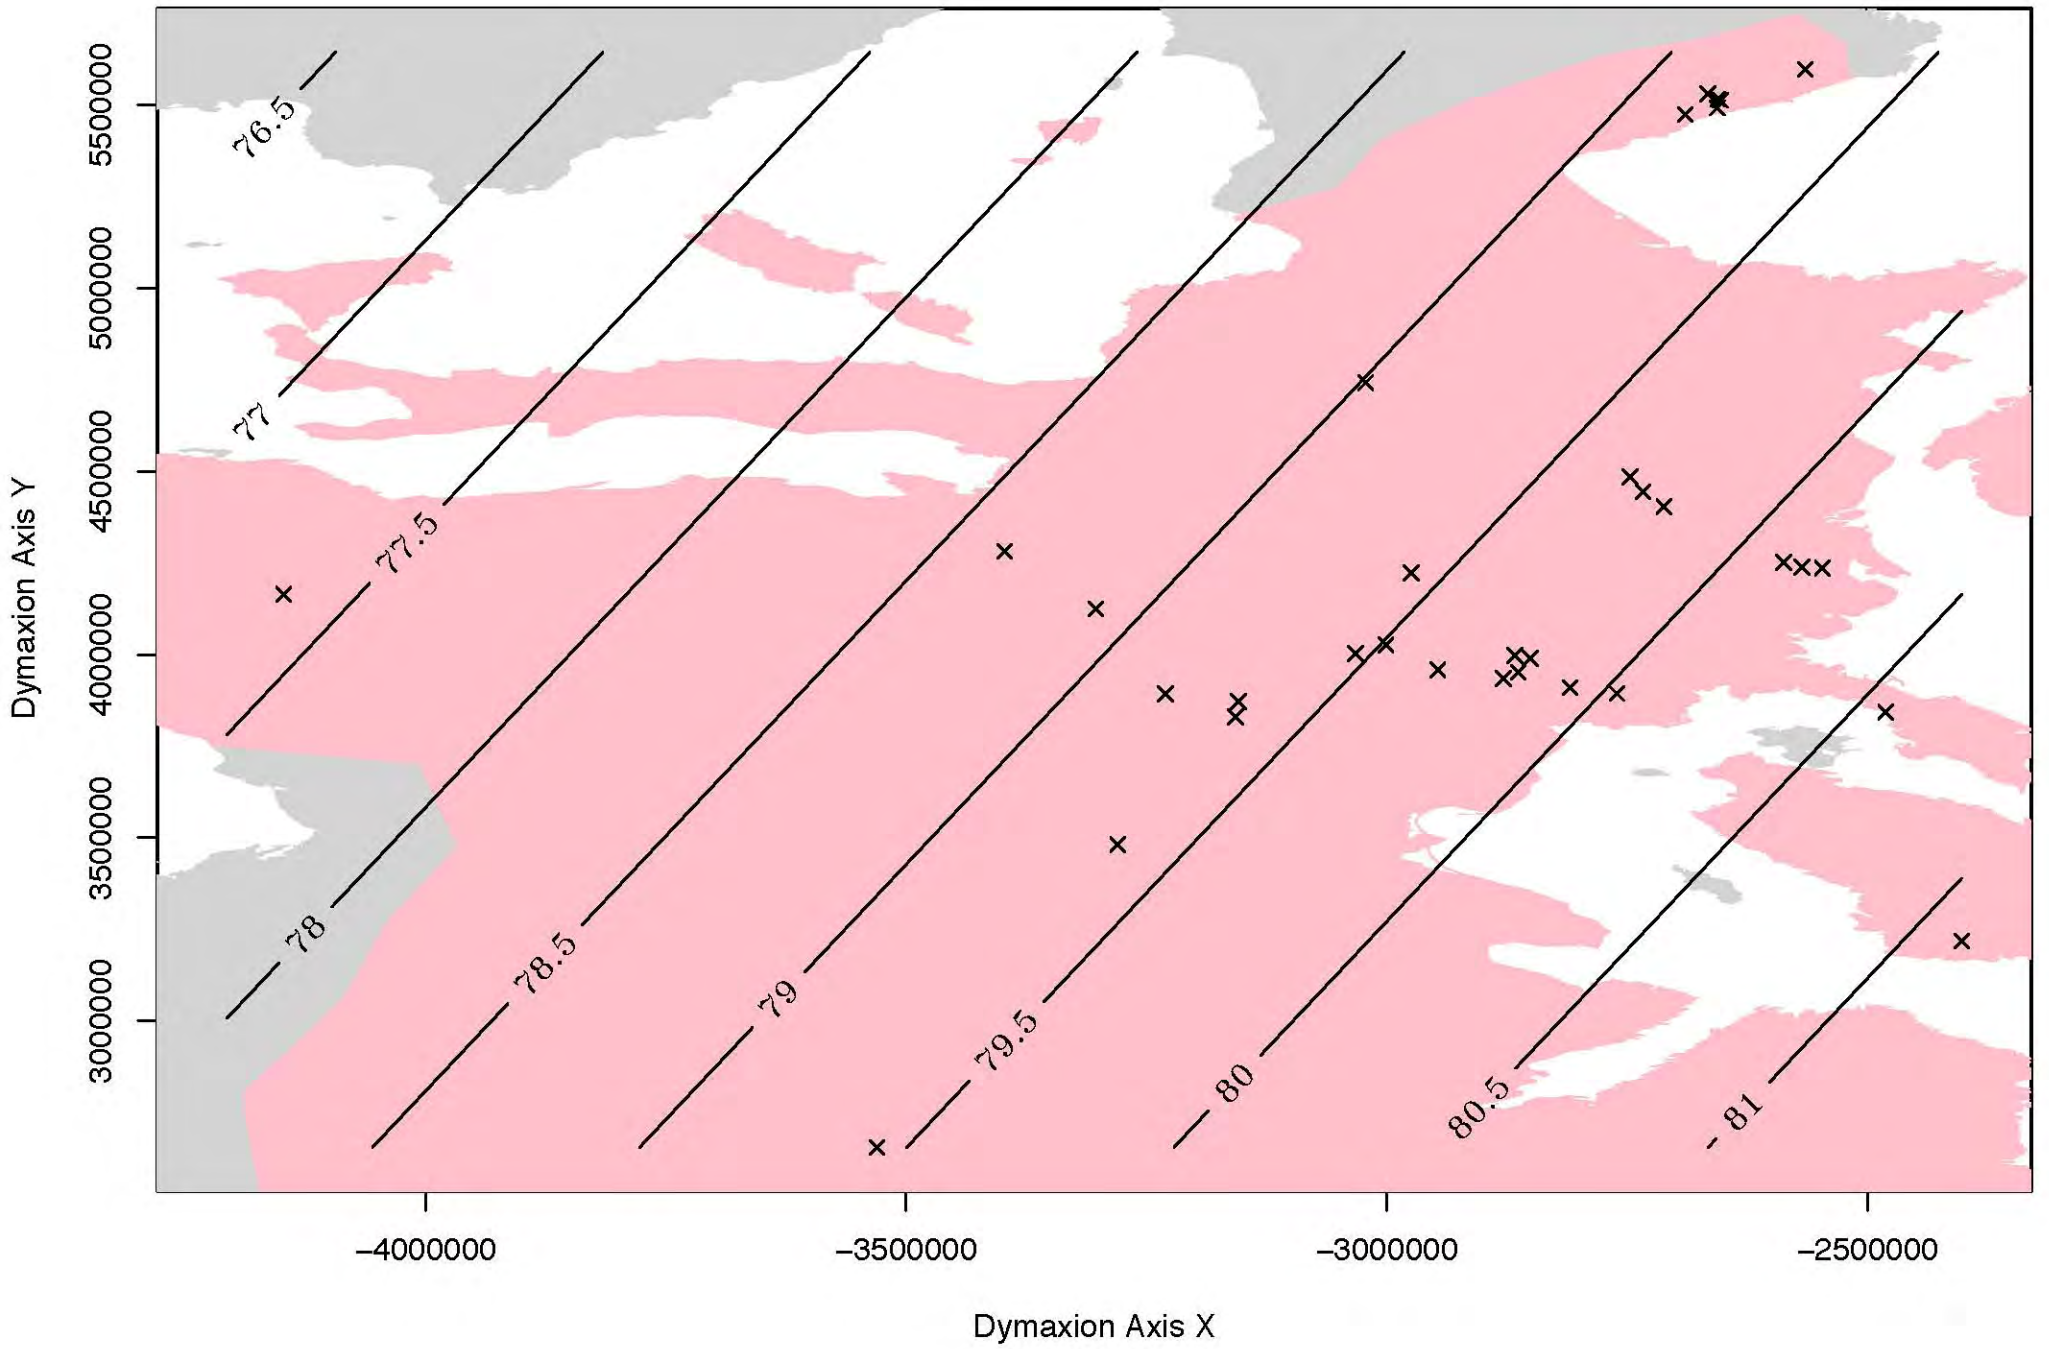

Marginal GAM Surface for CBL in male Meles meles

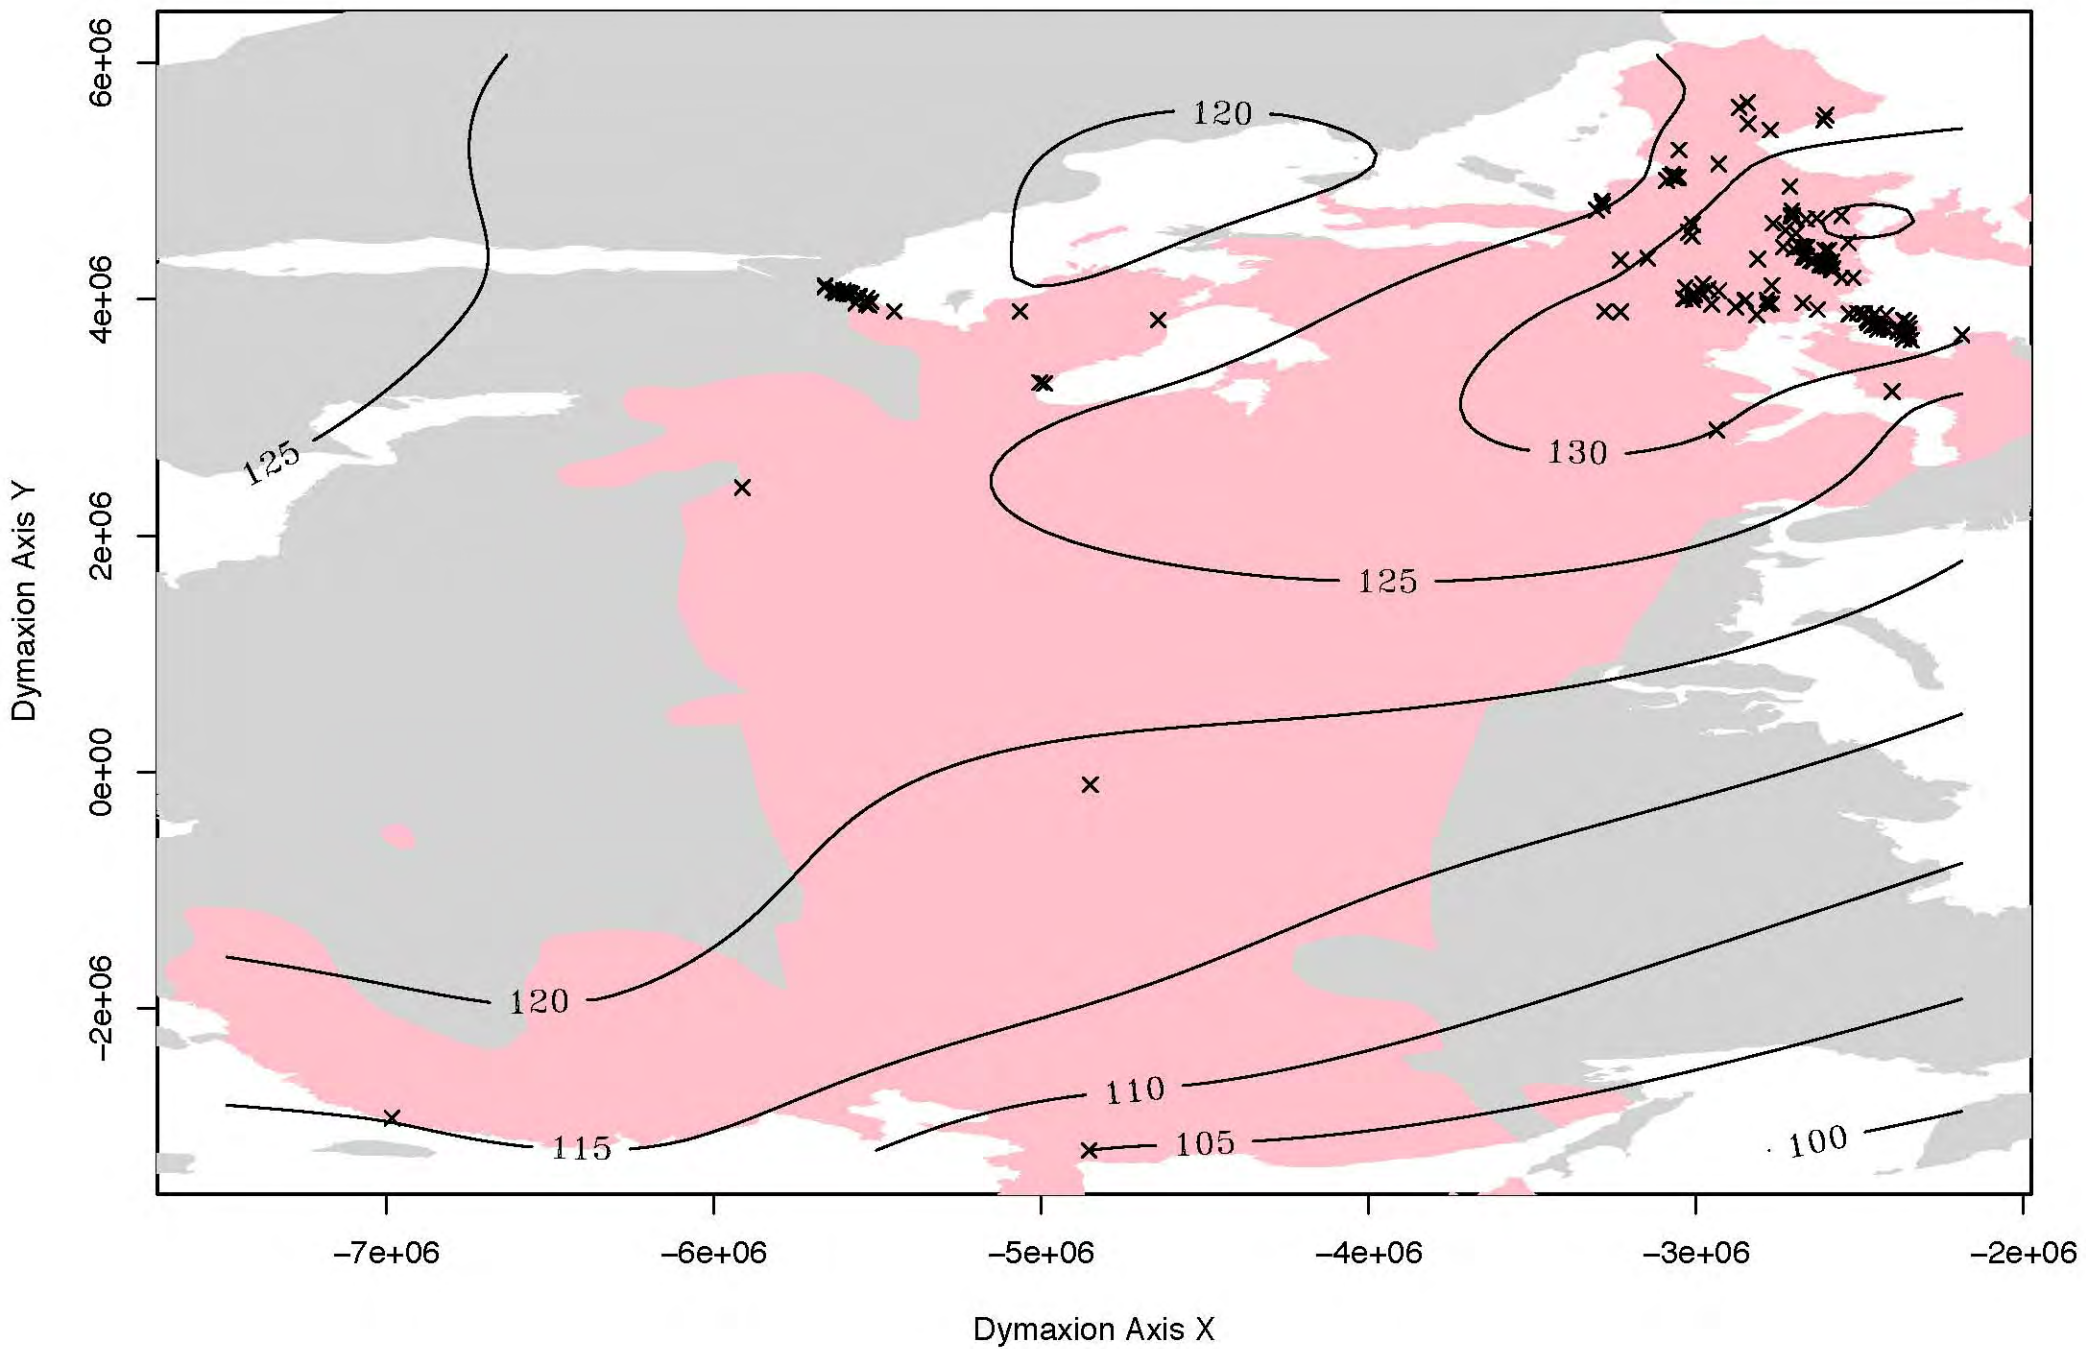

Marginal GAM Surface for CBL in female Meles meles

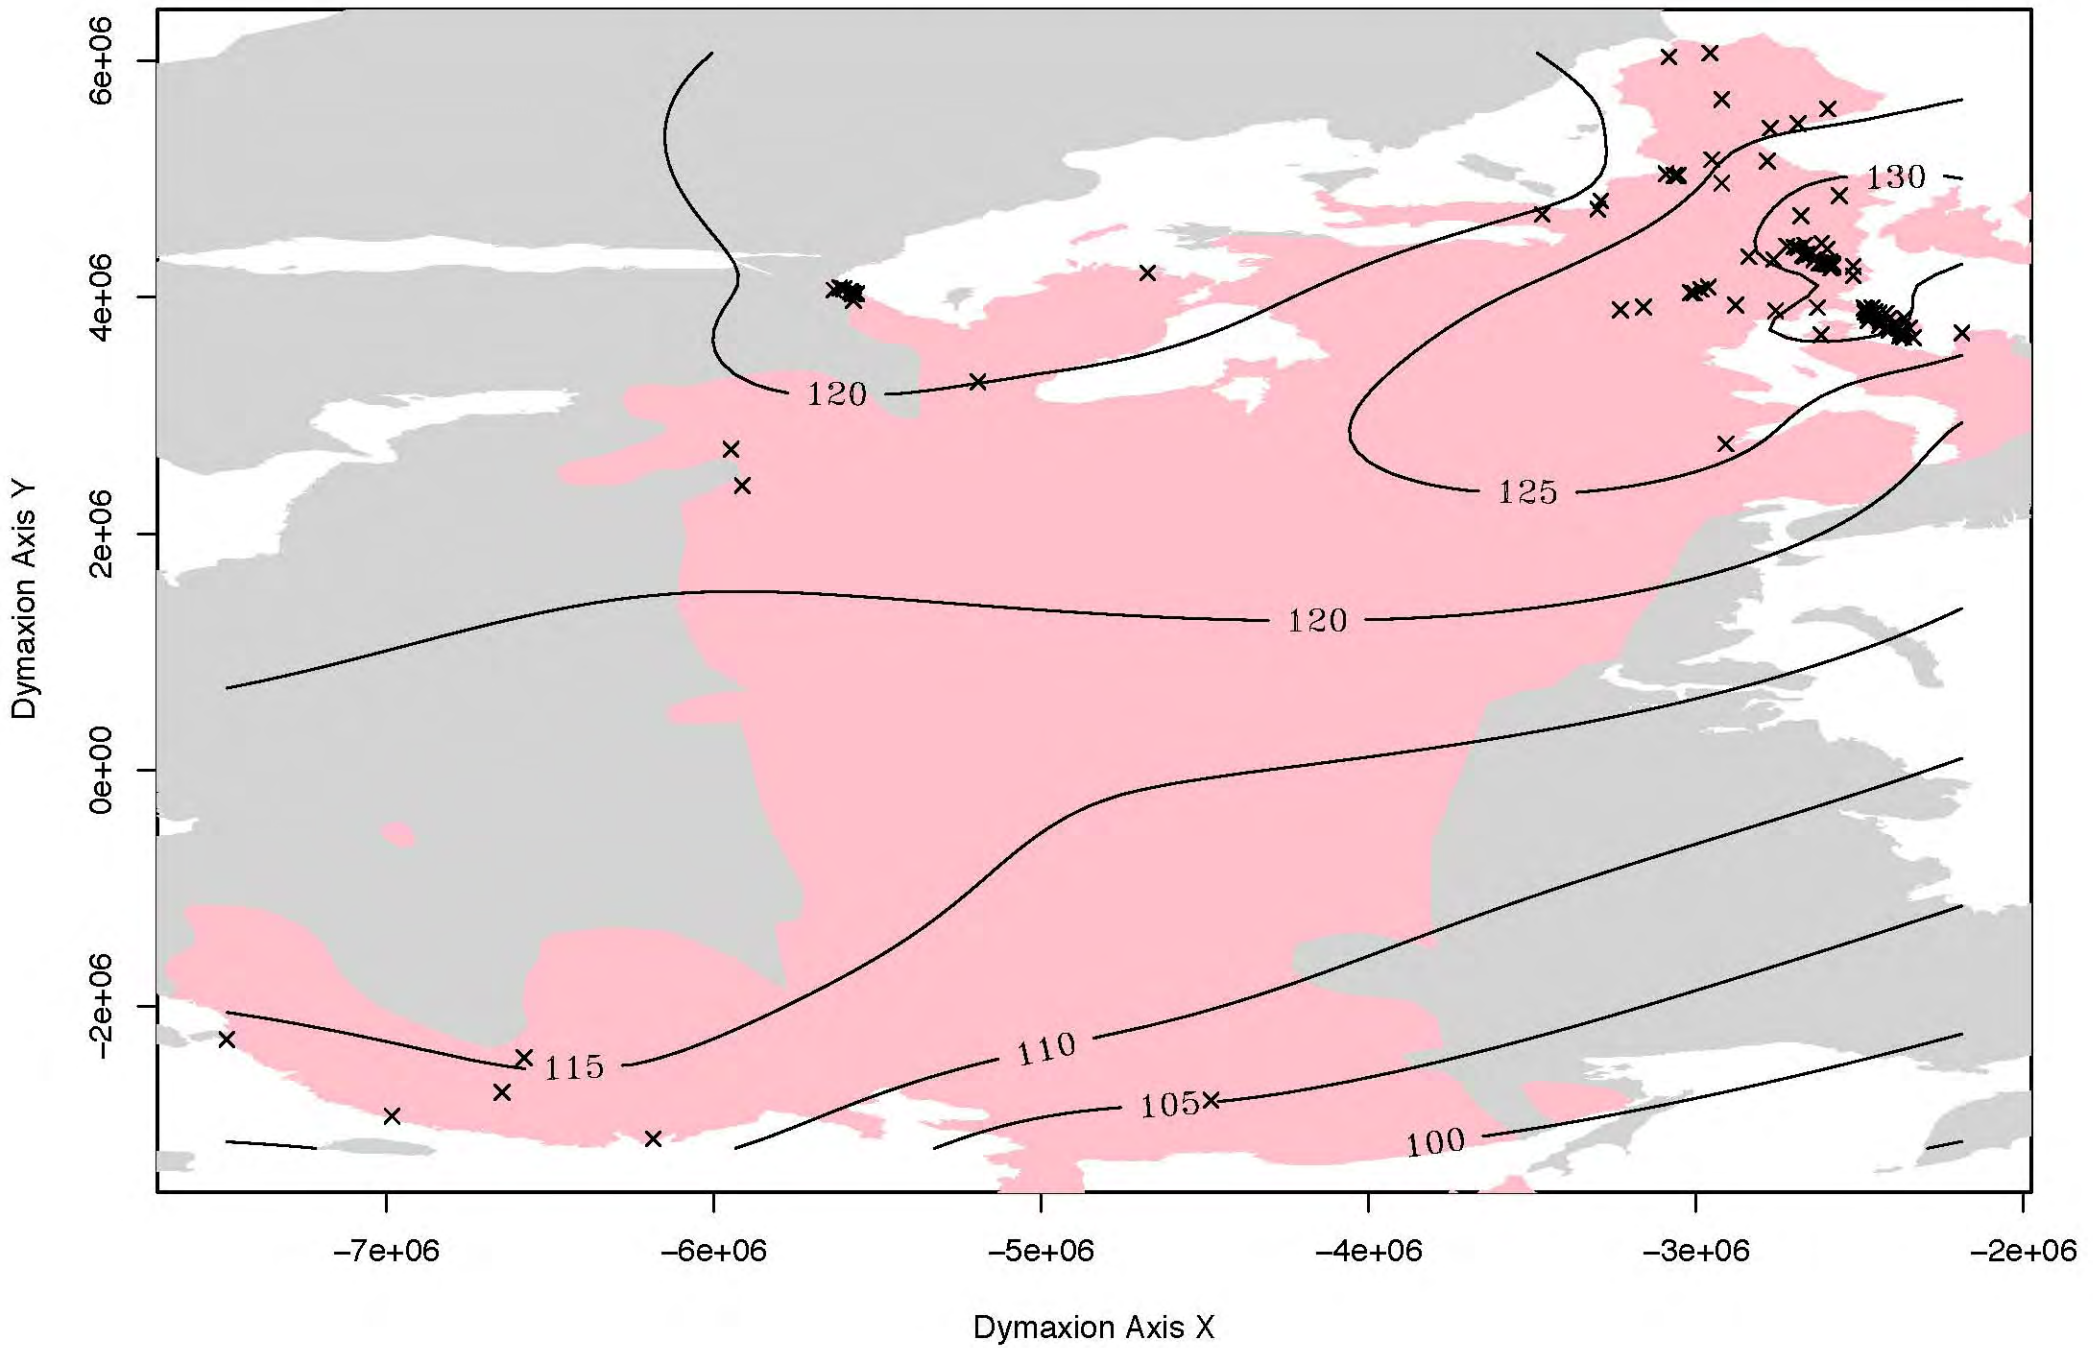



Marginal GAM Surface for CBL in male *Mustela erminea* Nearctic

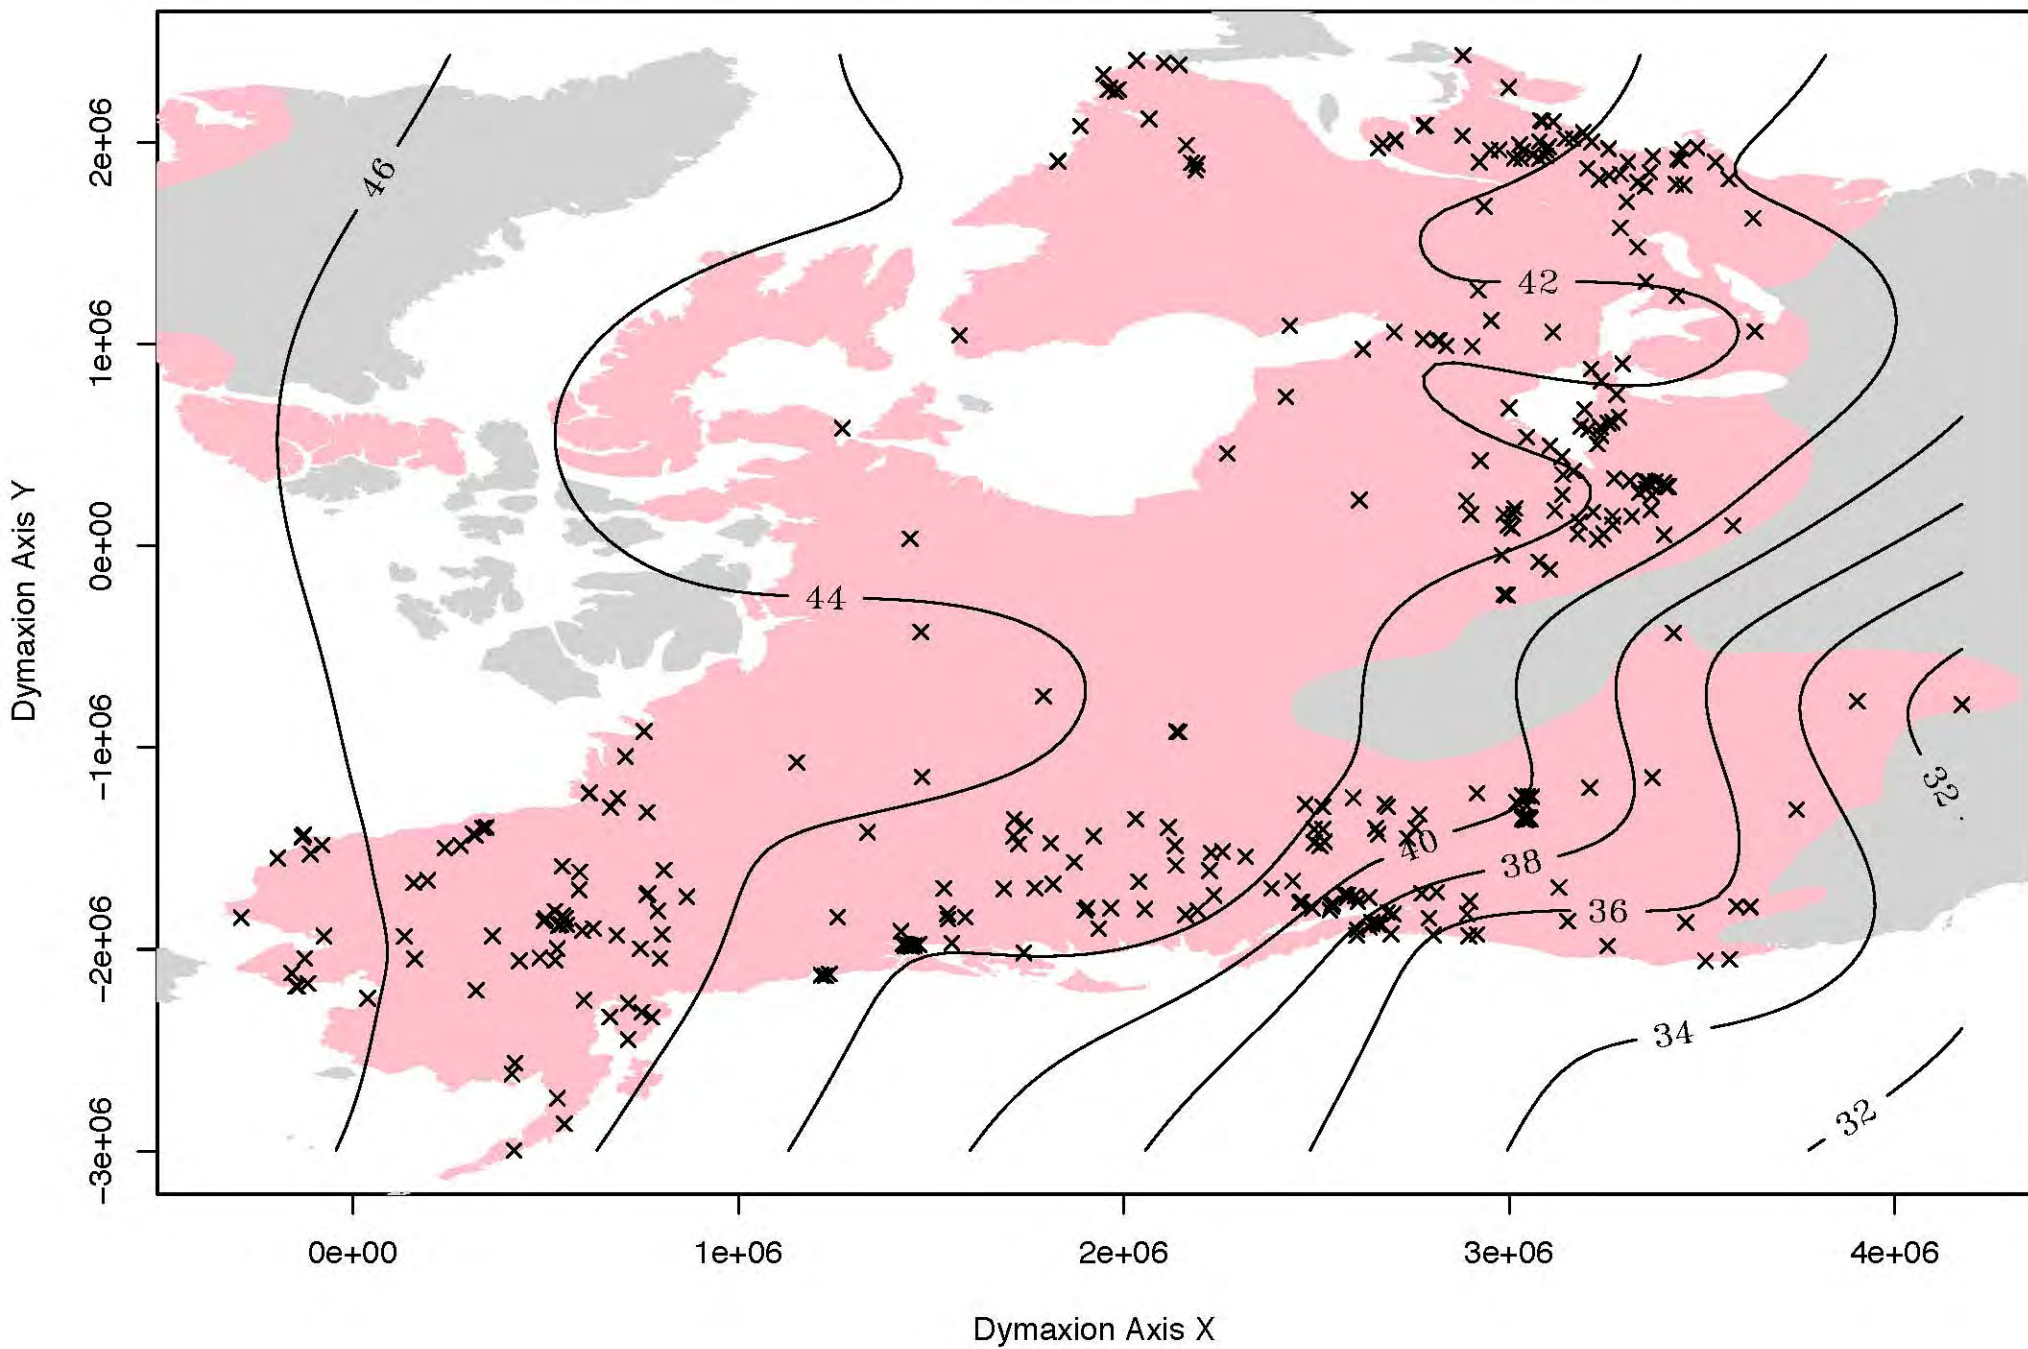

Marginal GAM Surface for CBL in female *Mustela erminea* Nearctic

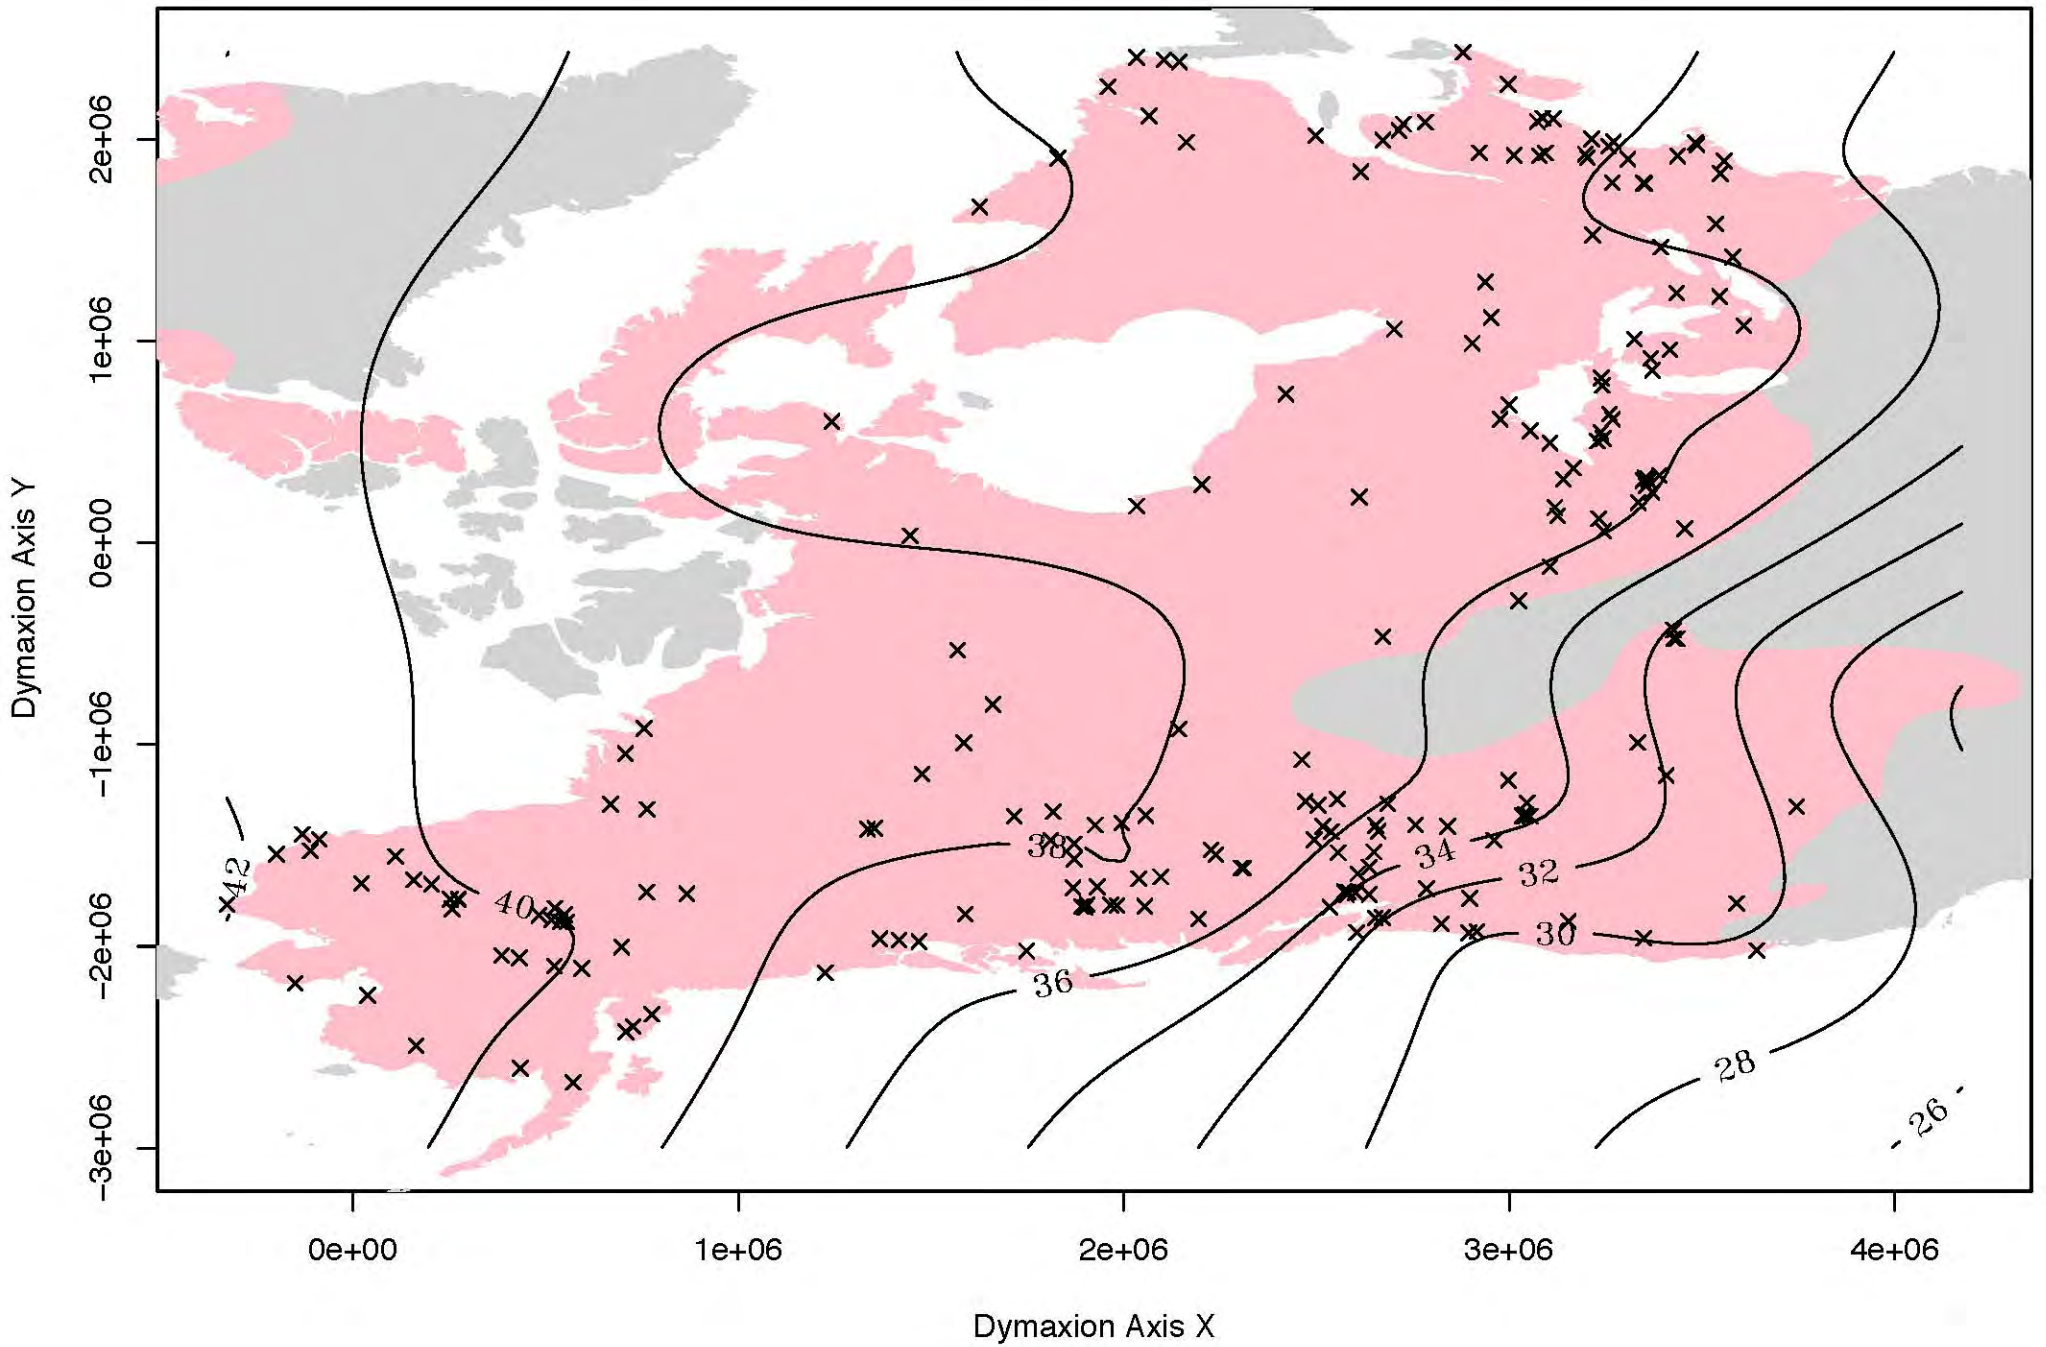



Marginal GAM Surface for CBL in male *Mustela erminea* Palearctic

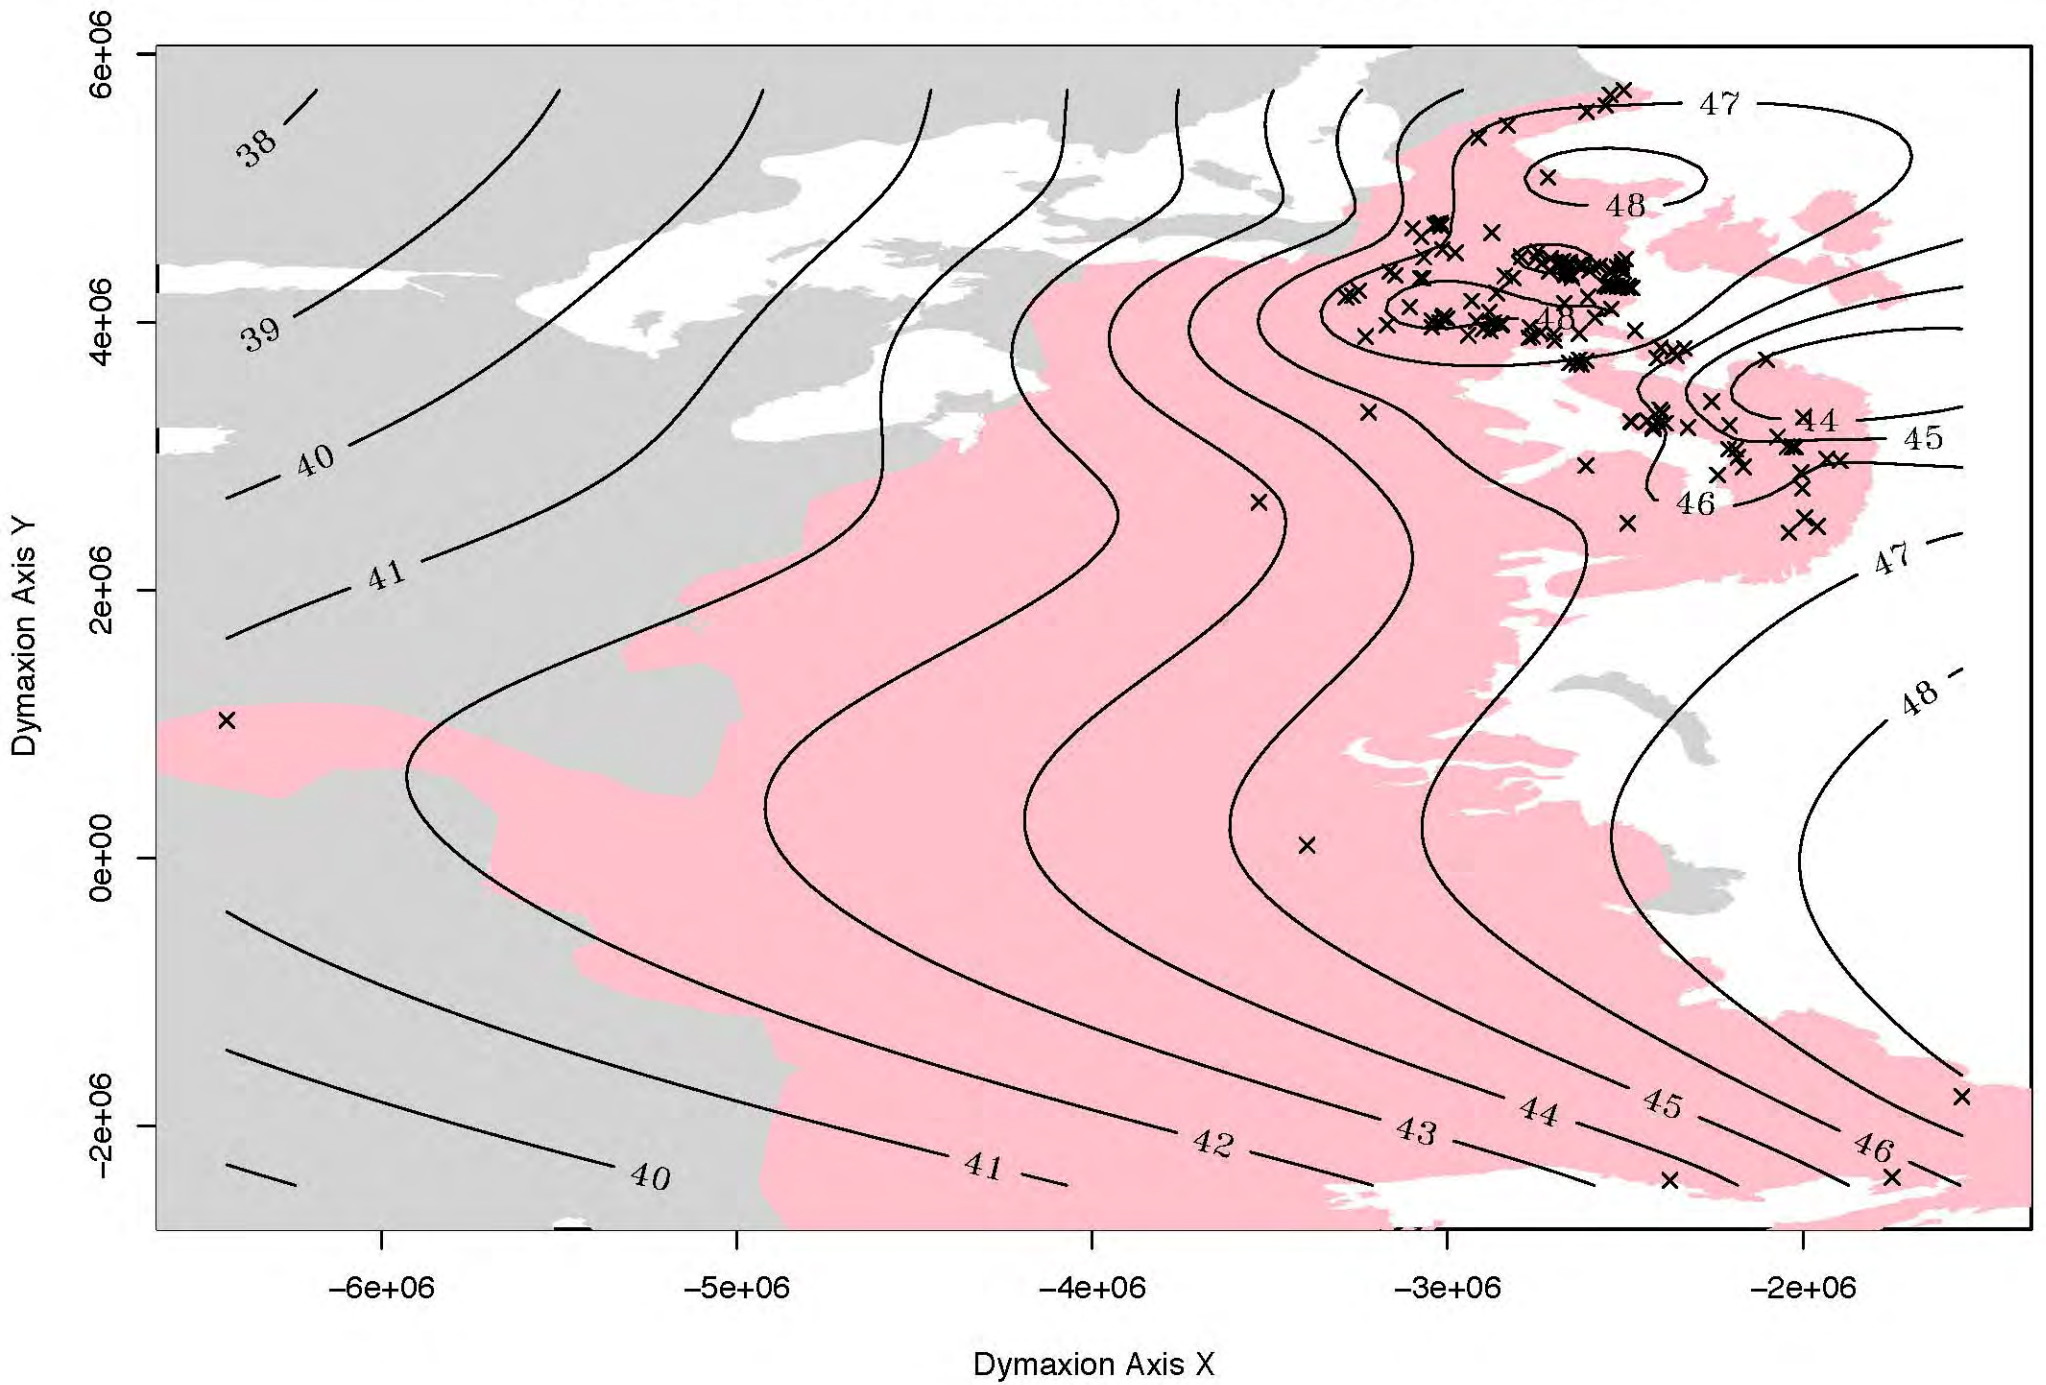



Marginal GAM Surface for CBL in female *Mustela erminea* Palearctic

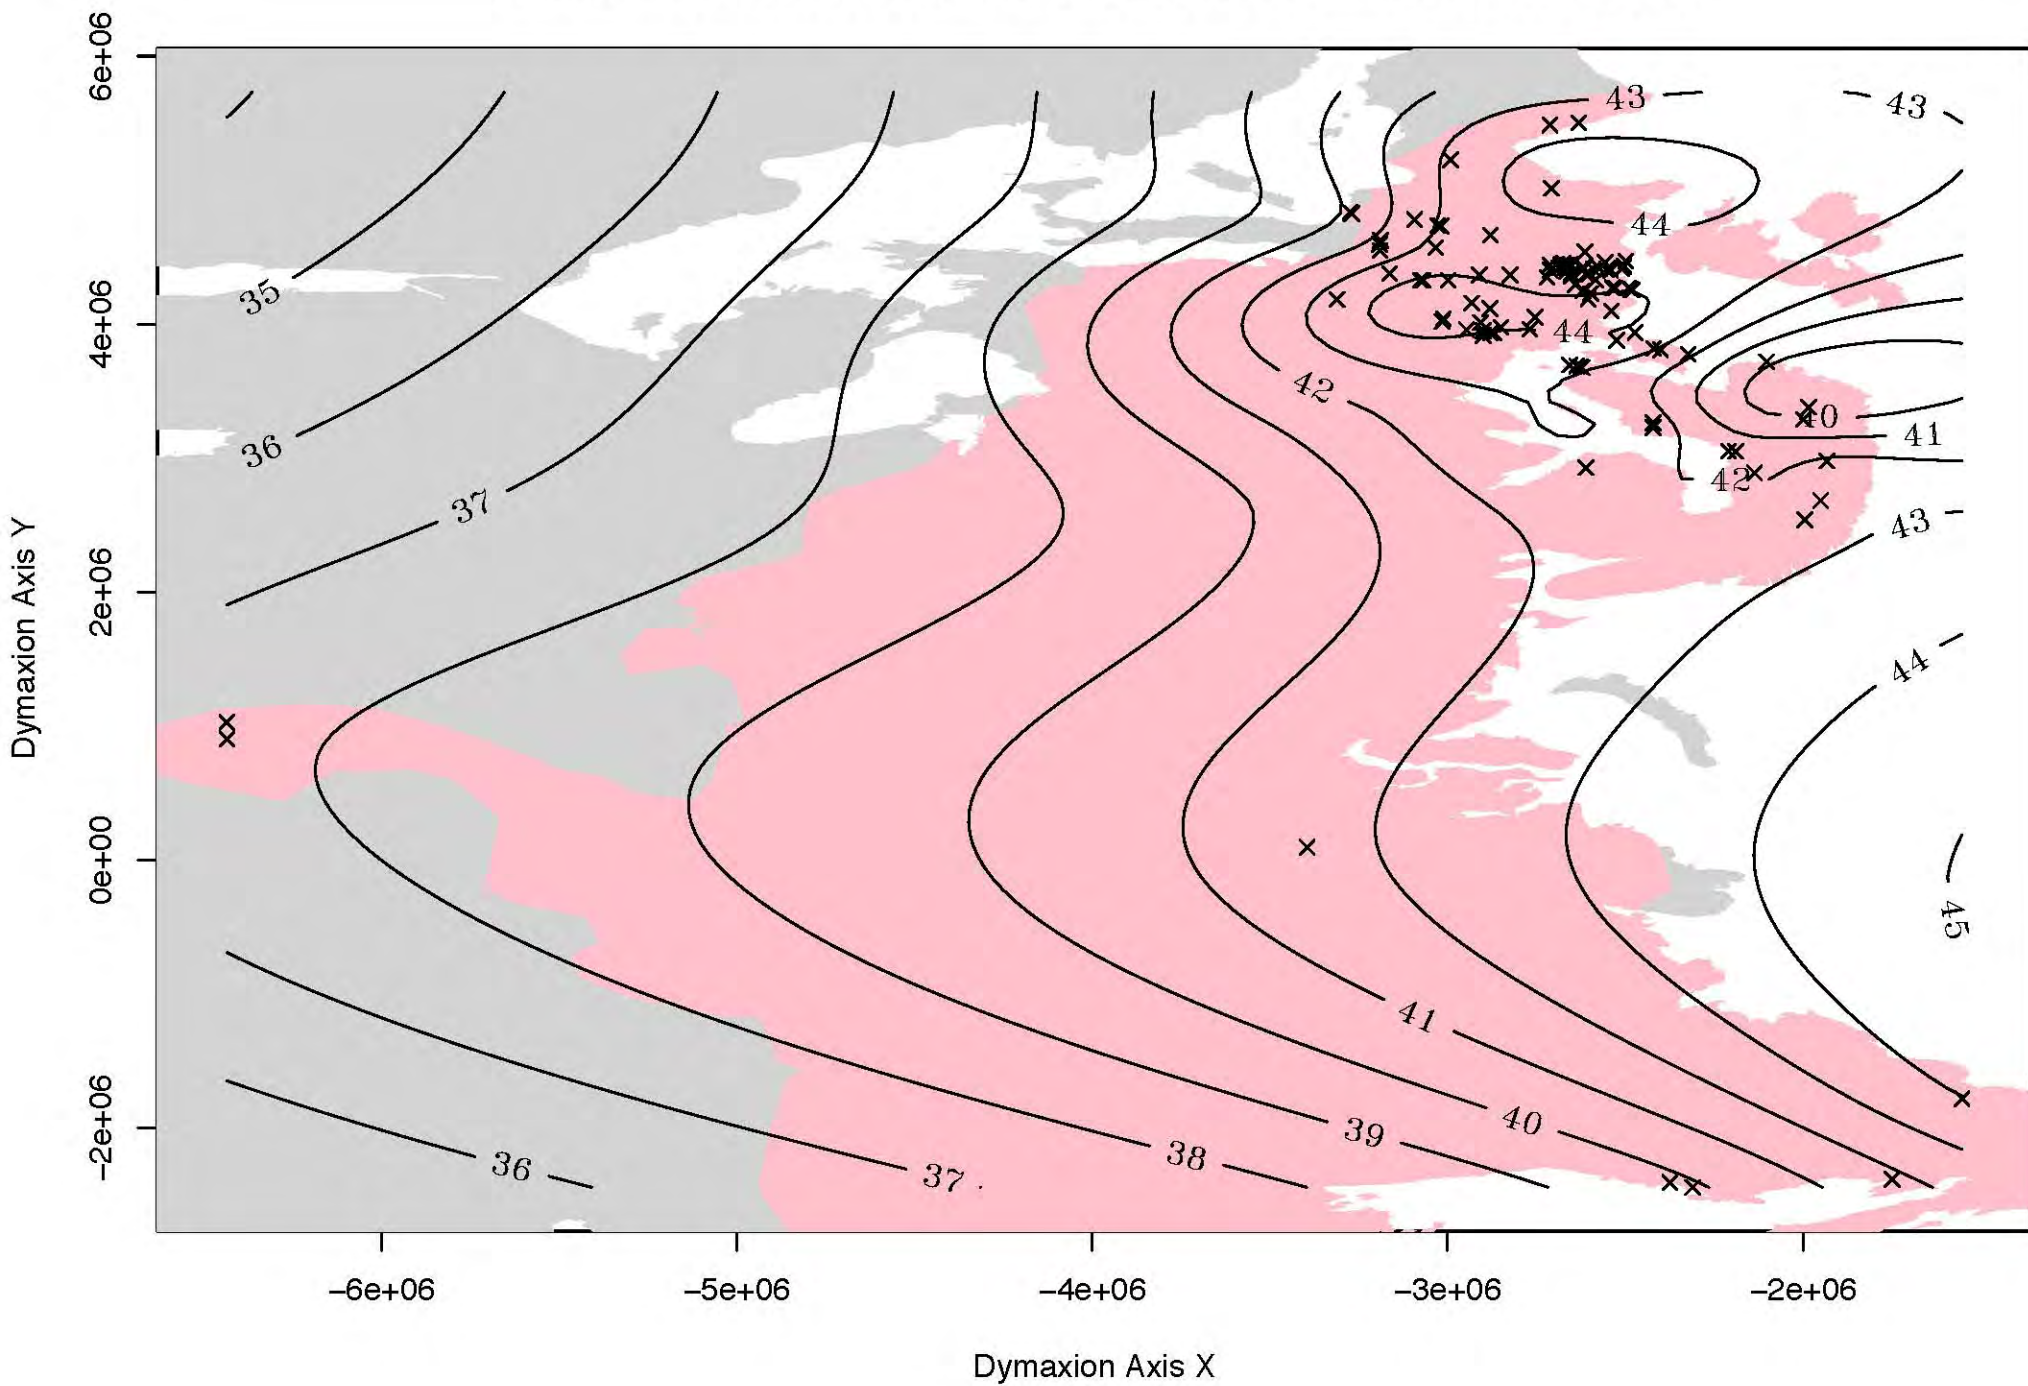

Marginal GAM Surface for CBL in male *Mustela frenata*

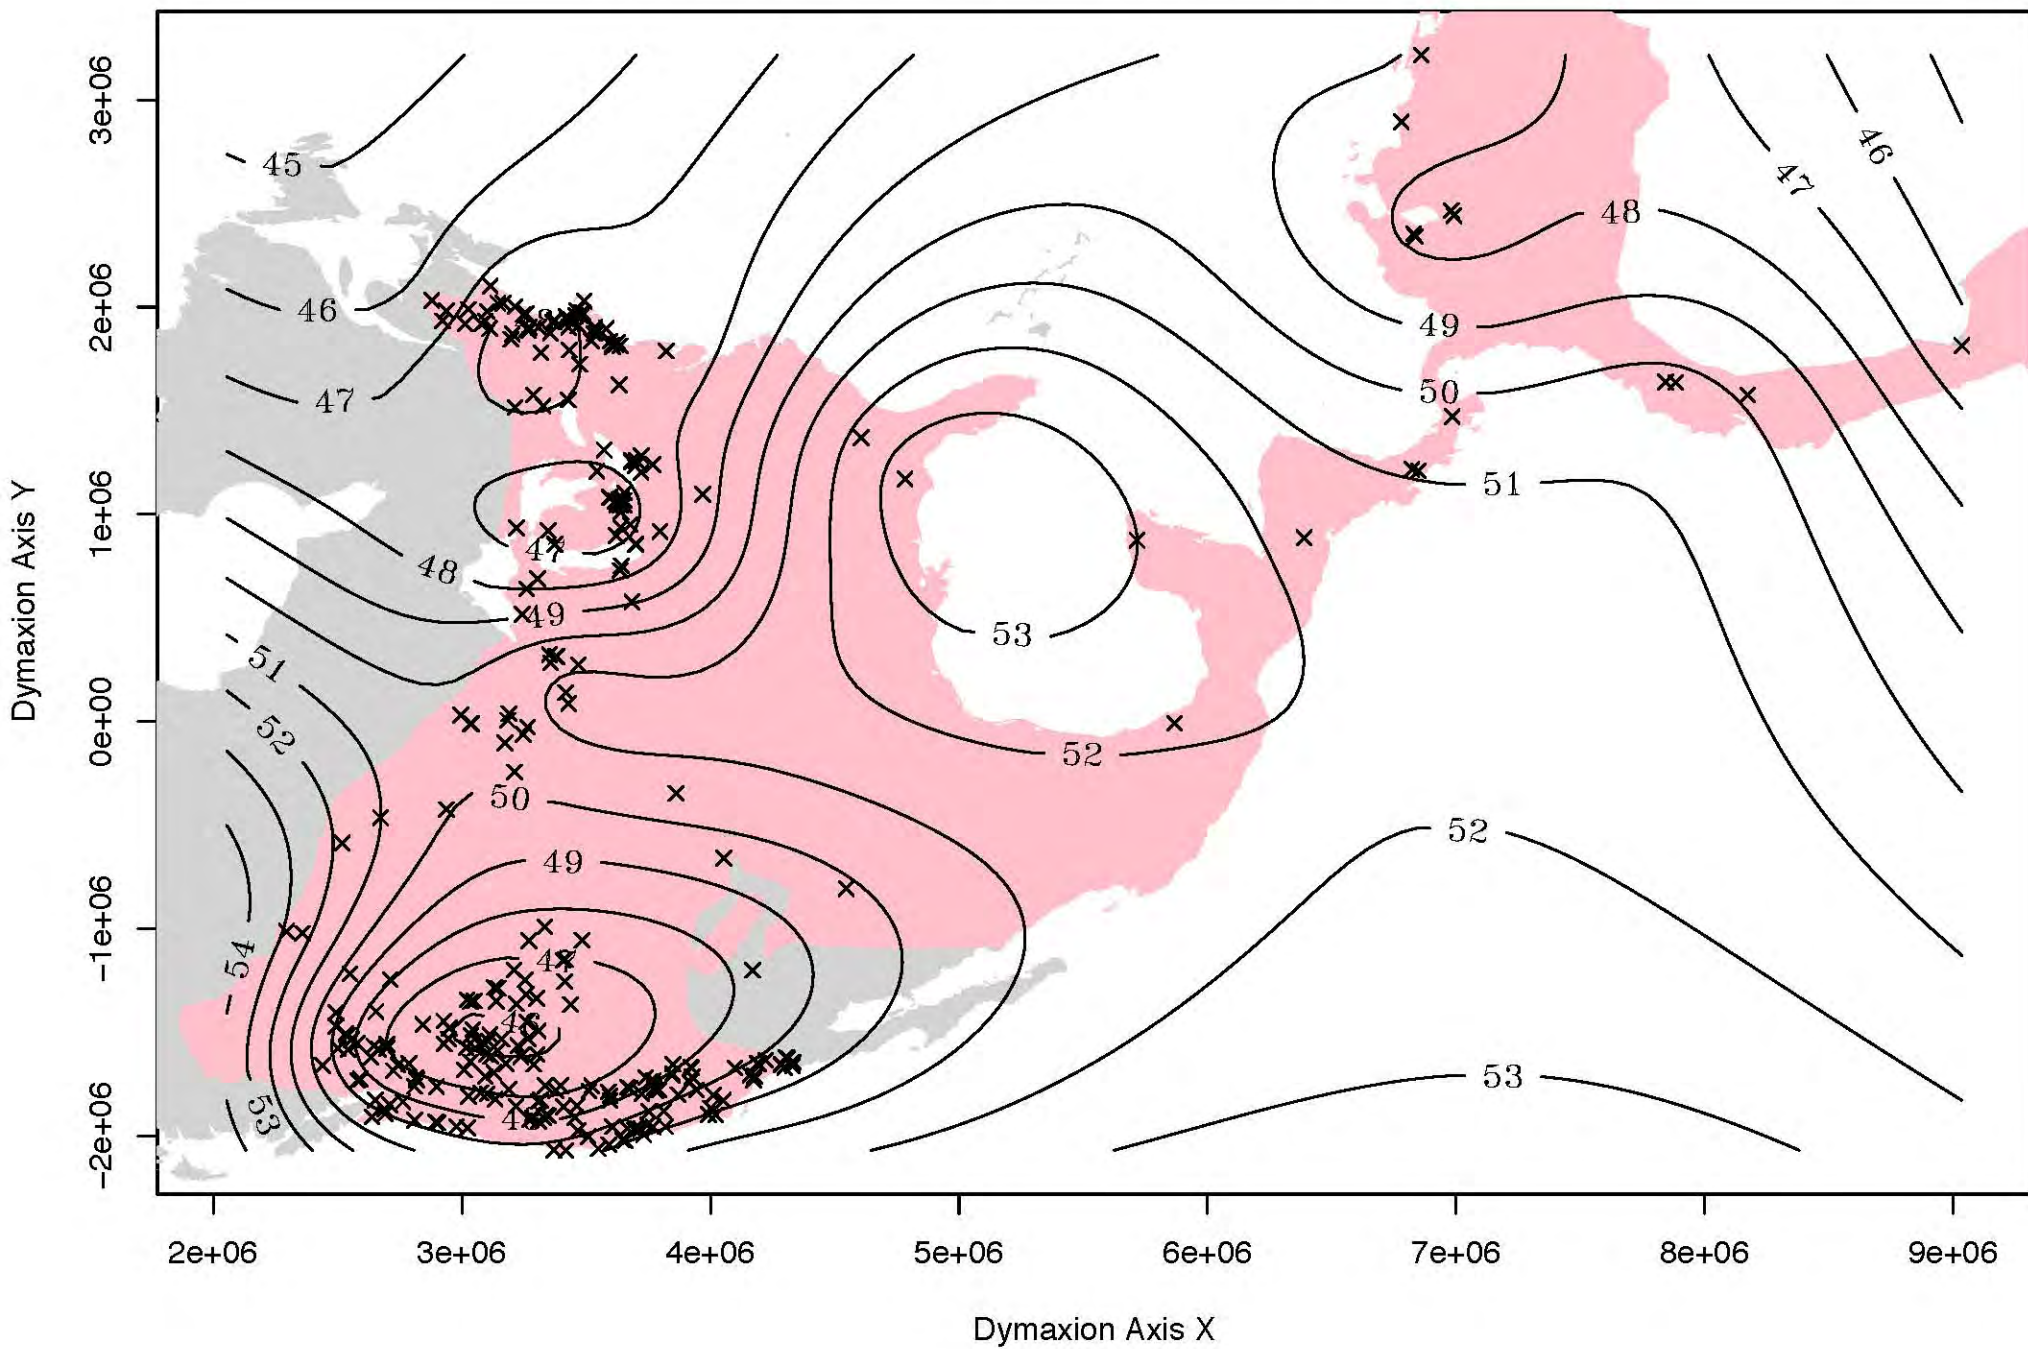



Marginal GAM Surface for CBL in female *Mustela frenata*

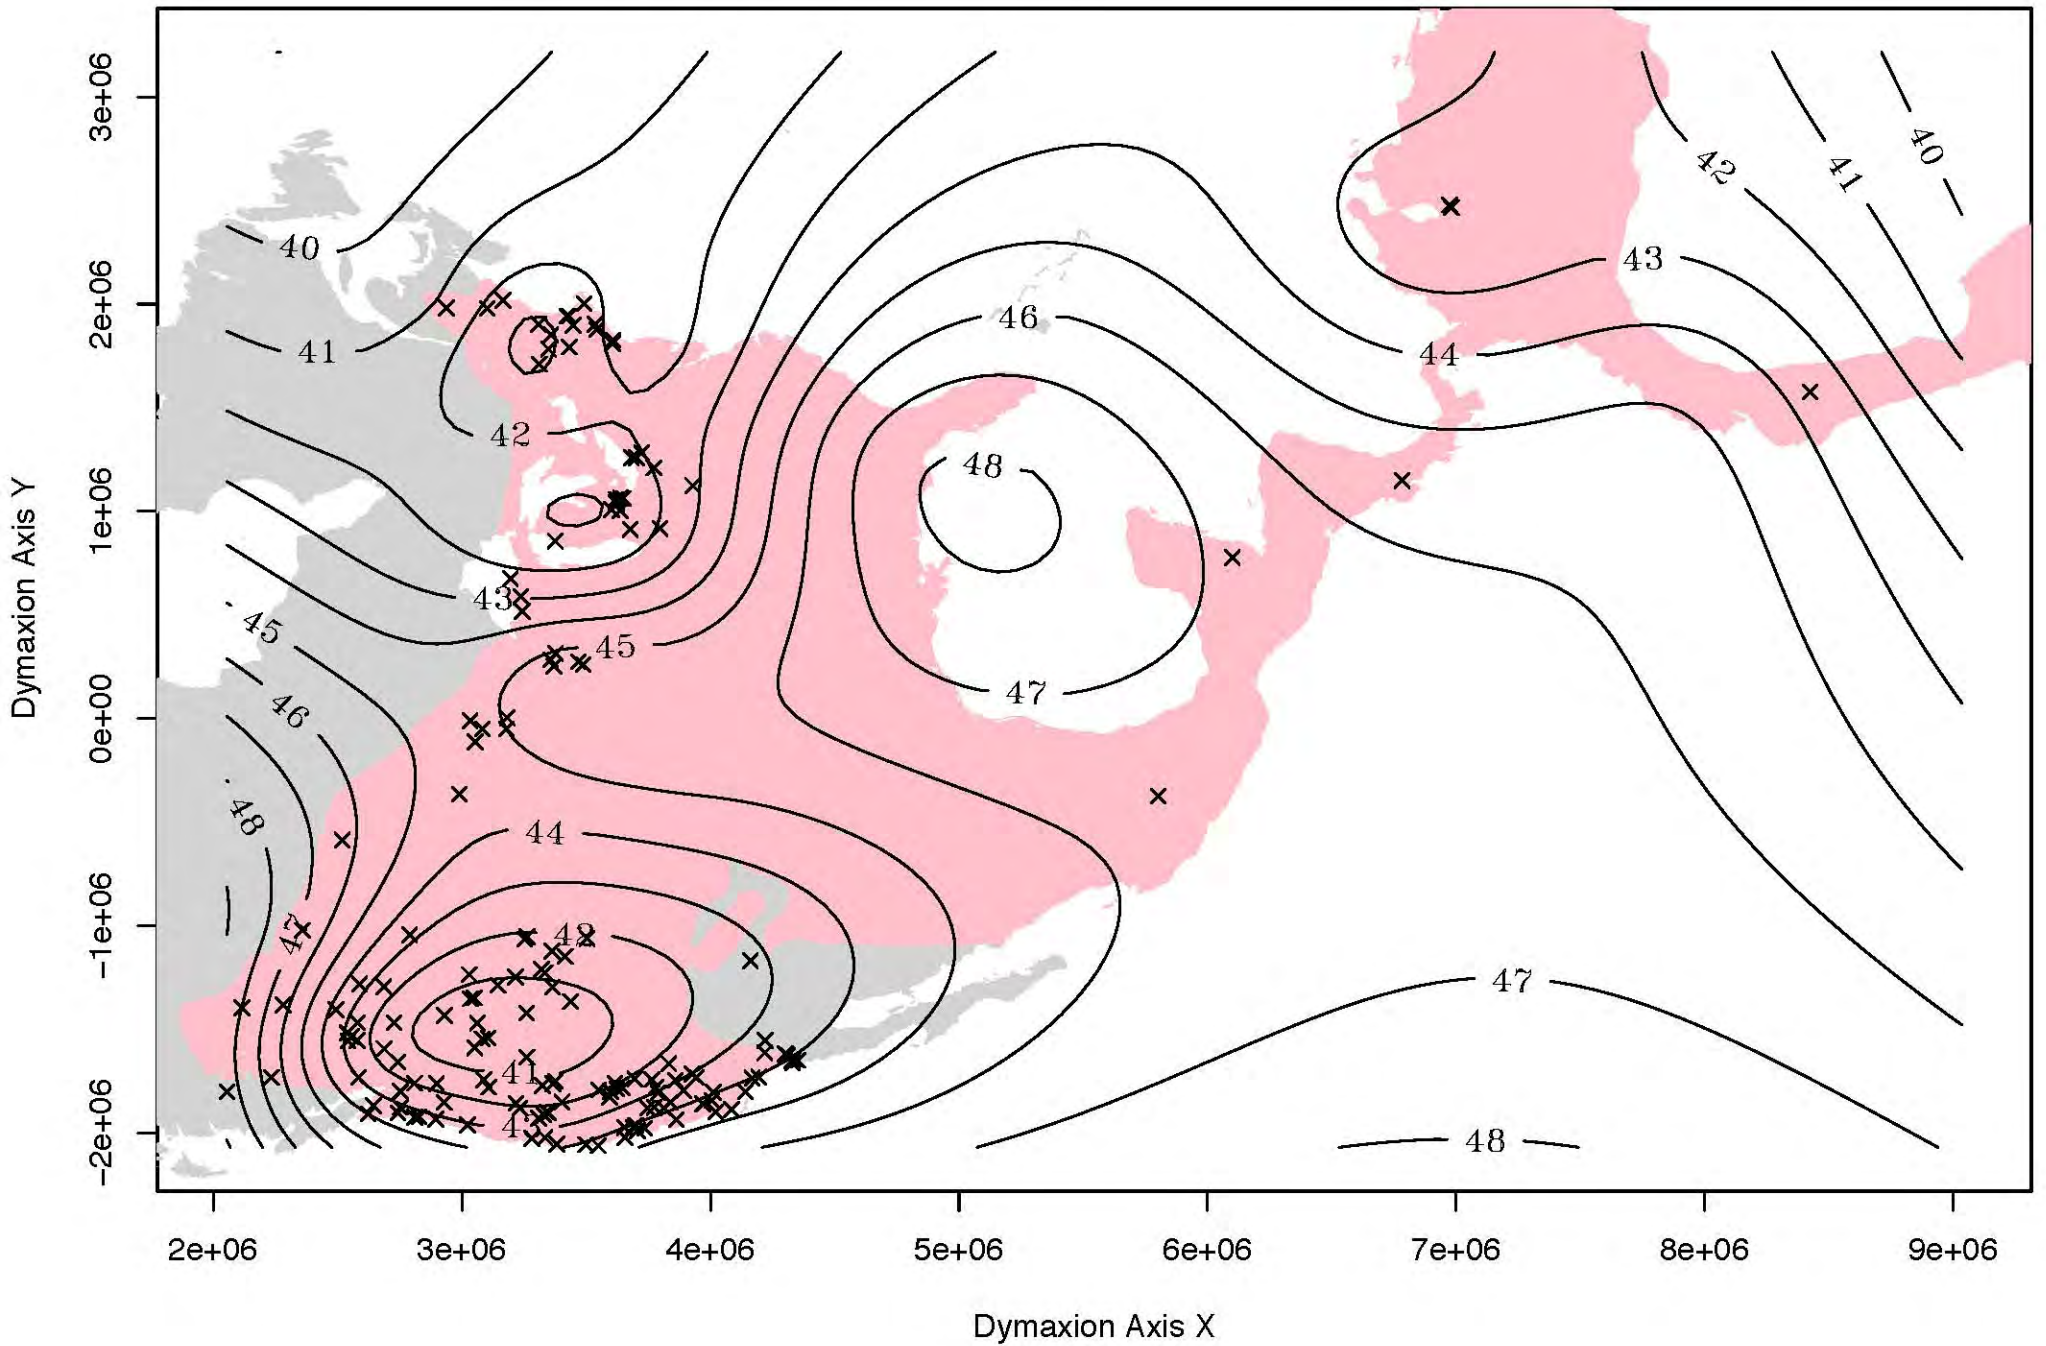



Marginal GAM Surface for CBL in male *Mustela nivalis* Nearctic

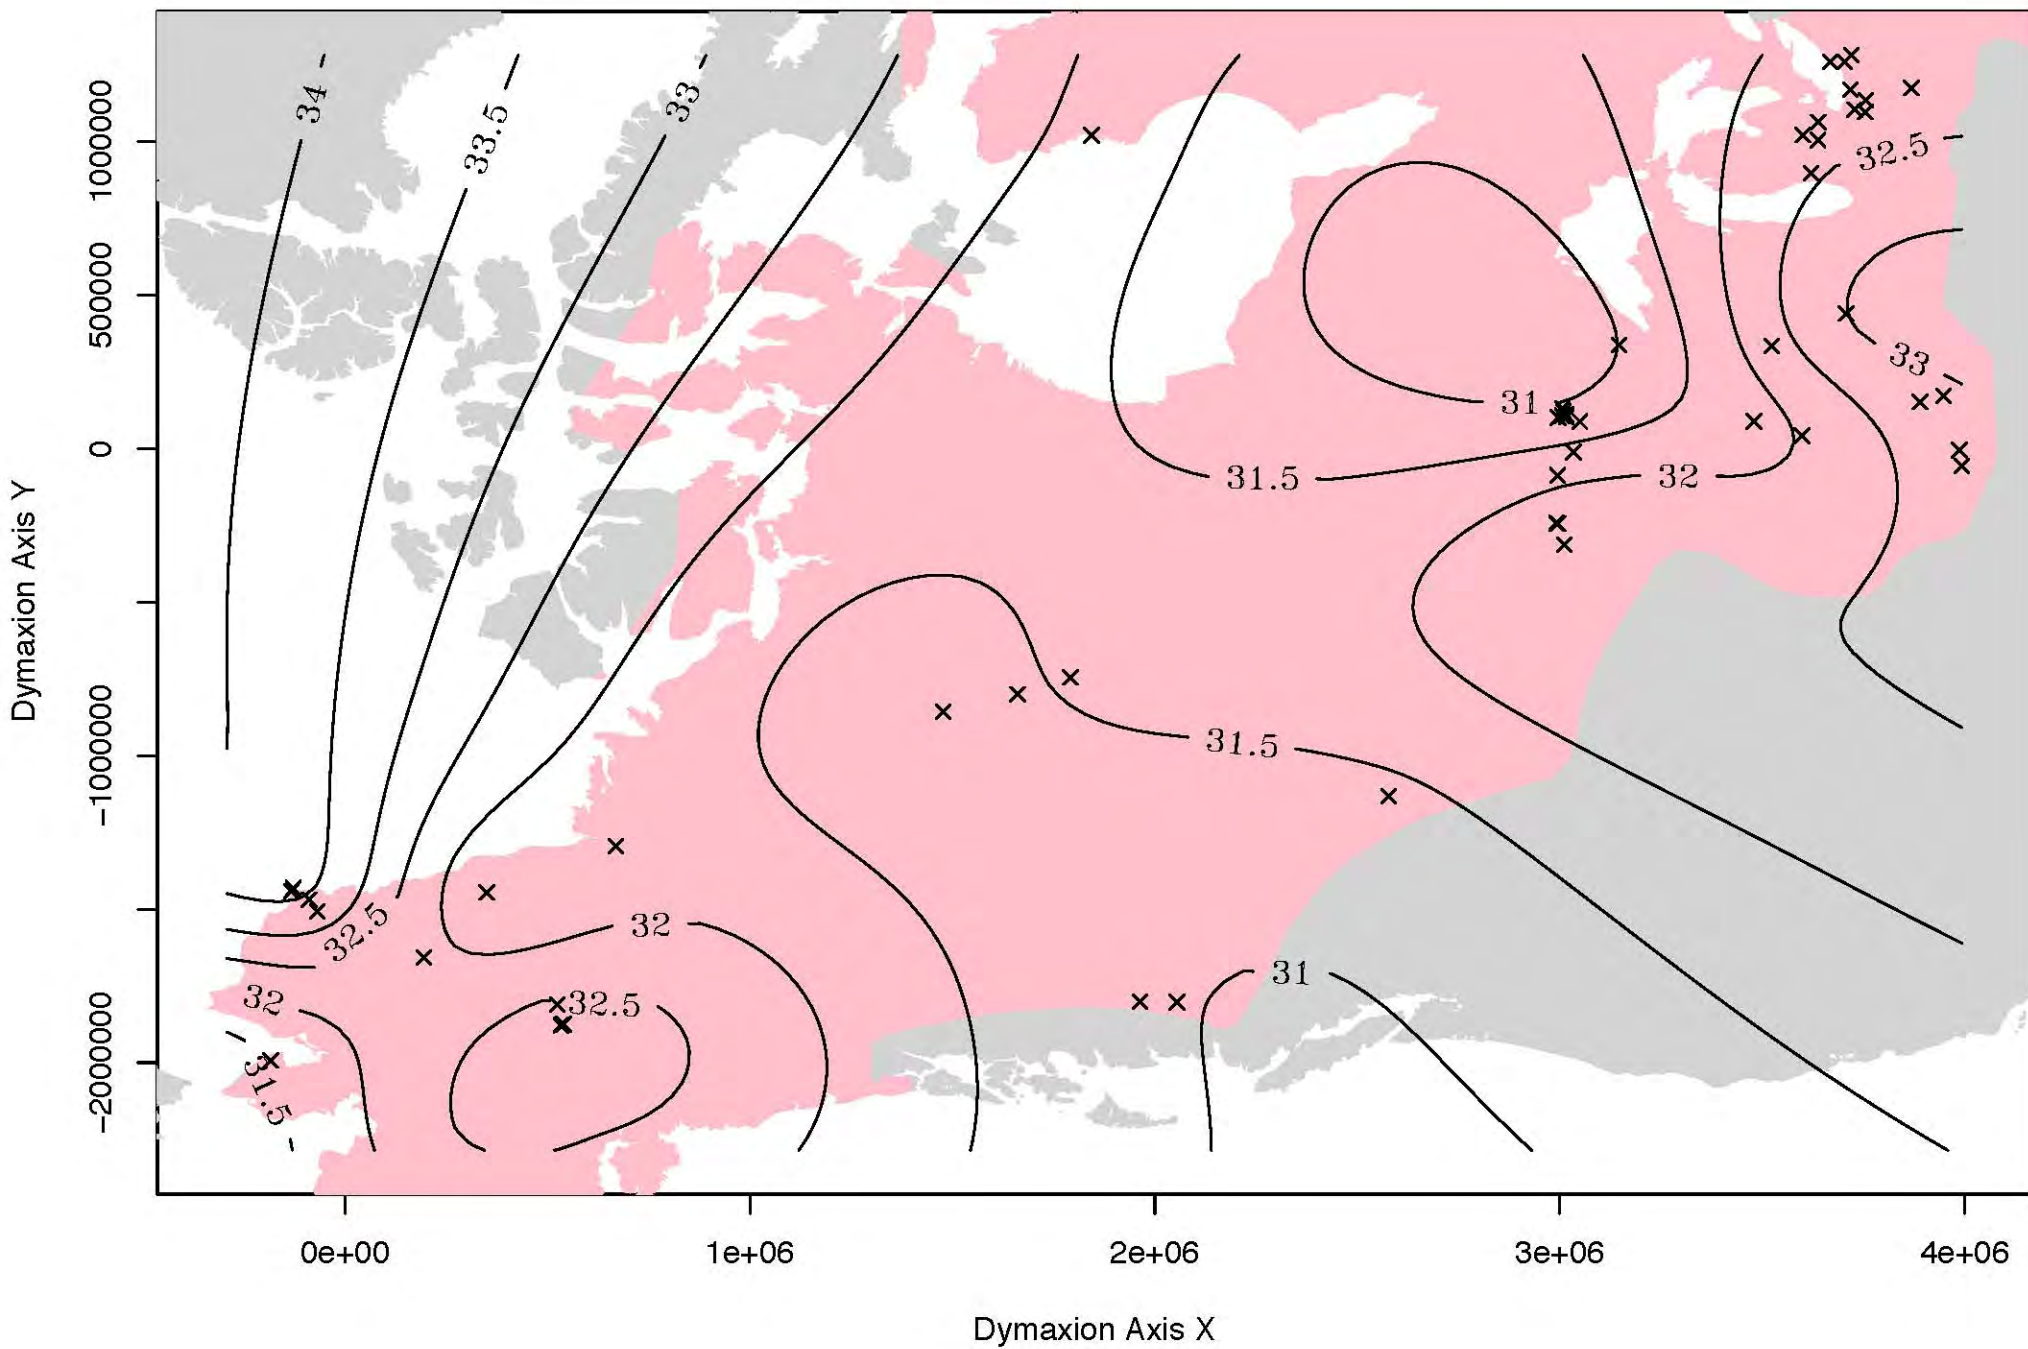

# Marginal GAM Surface for CBL in female *Mustela nivalis* Nearctic

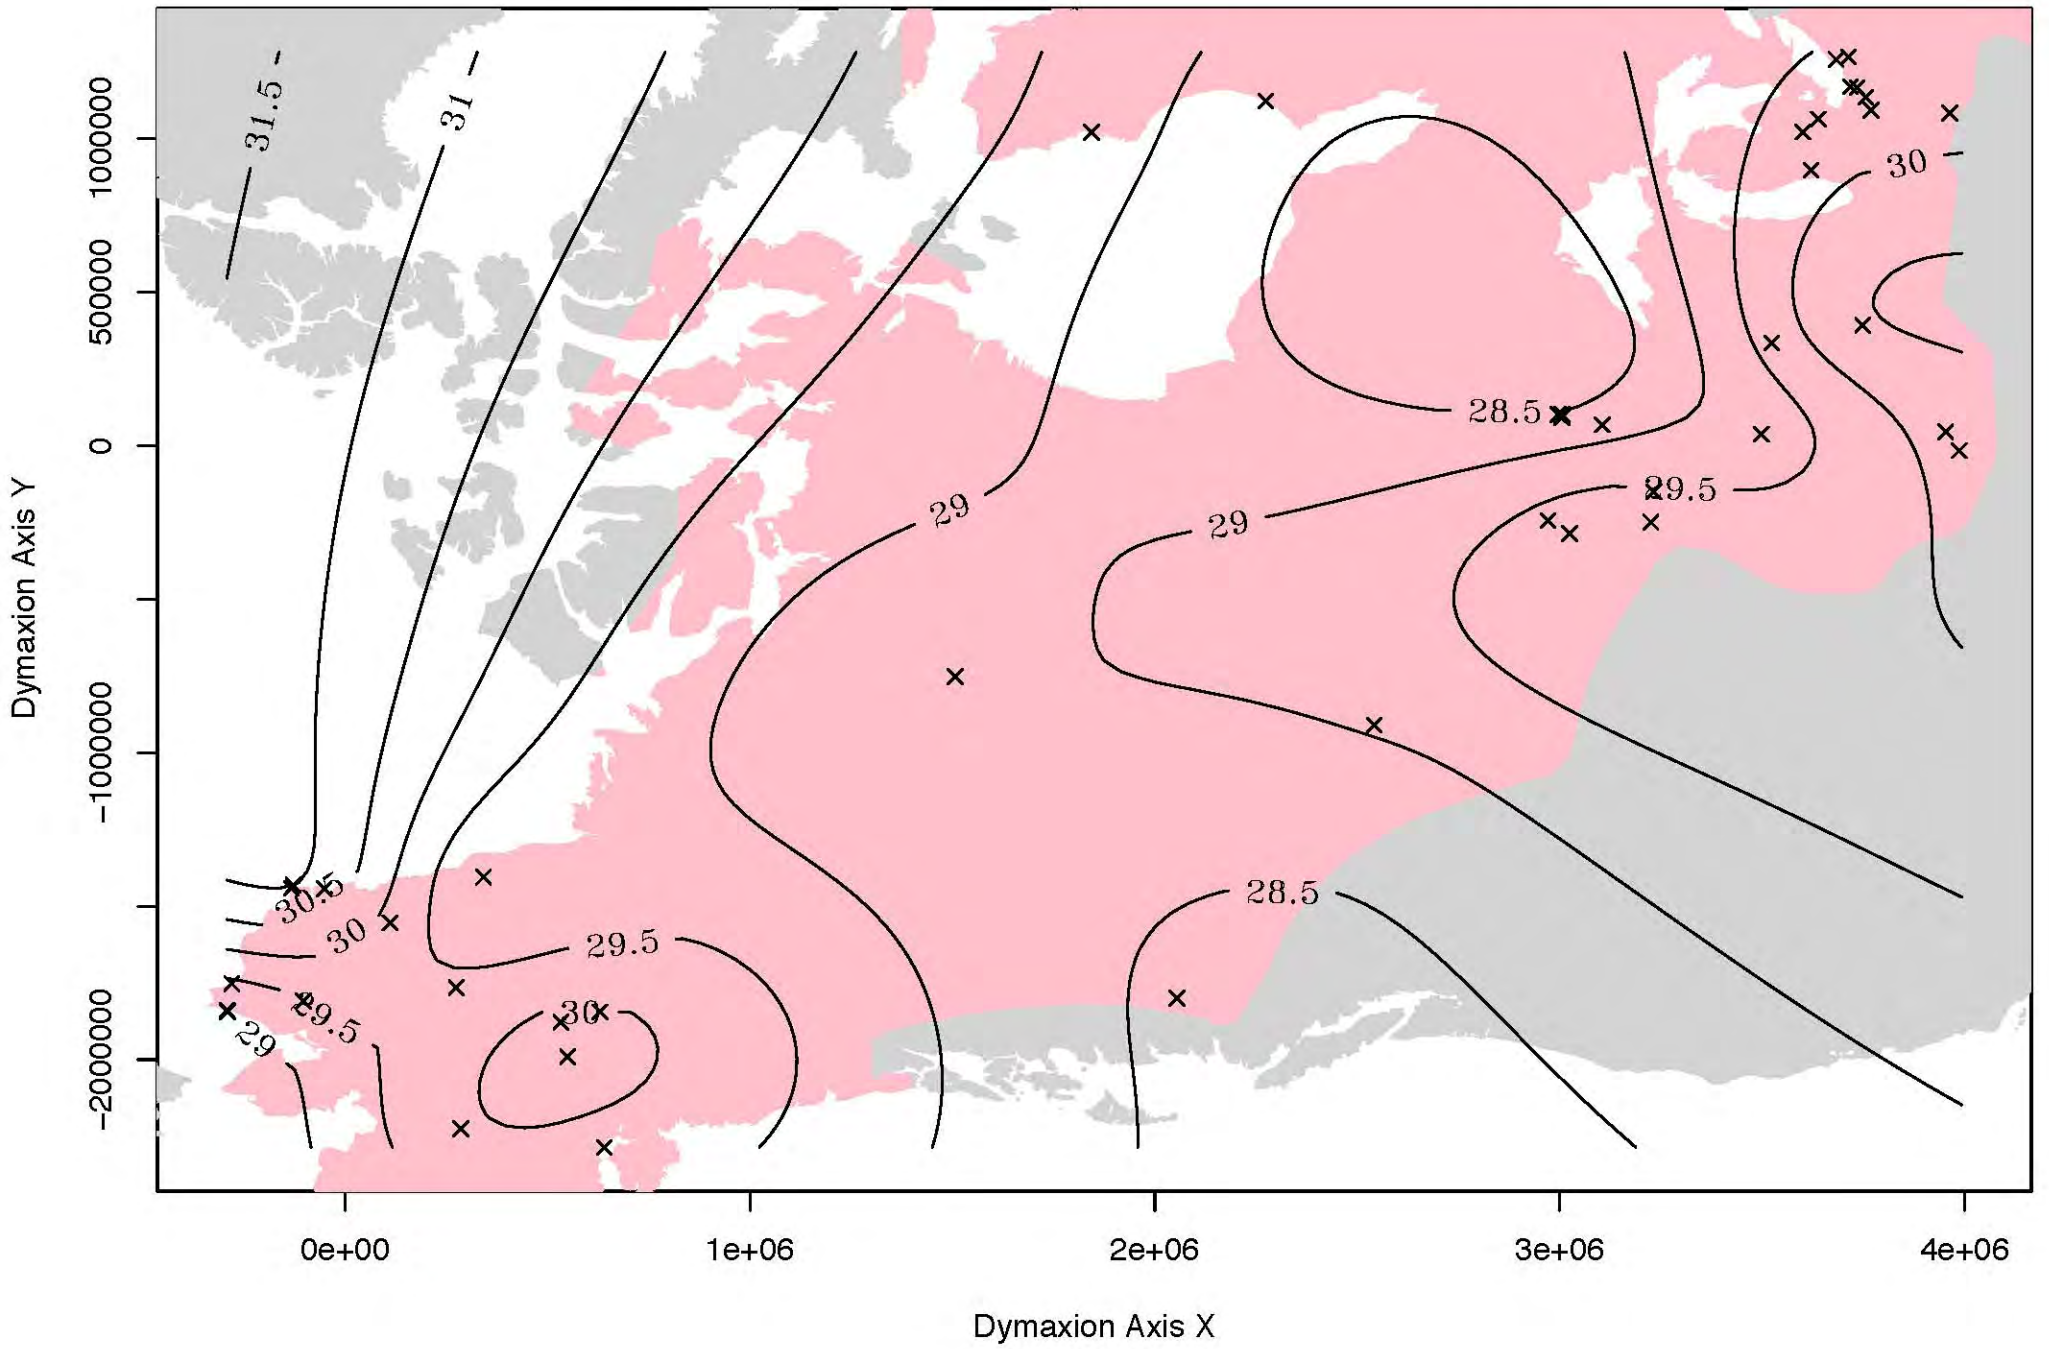



# Marginal GAM Surface for CBL in male *Mustela nivalis* Palearctic

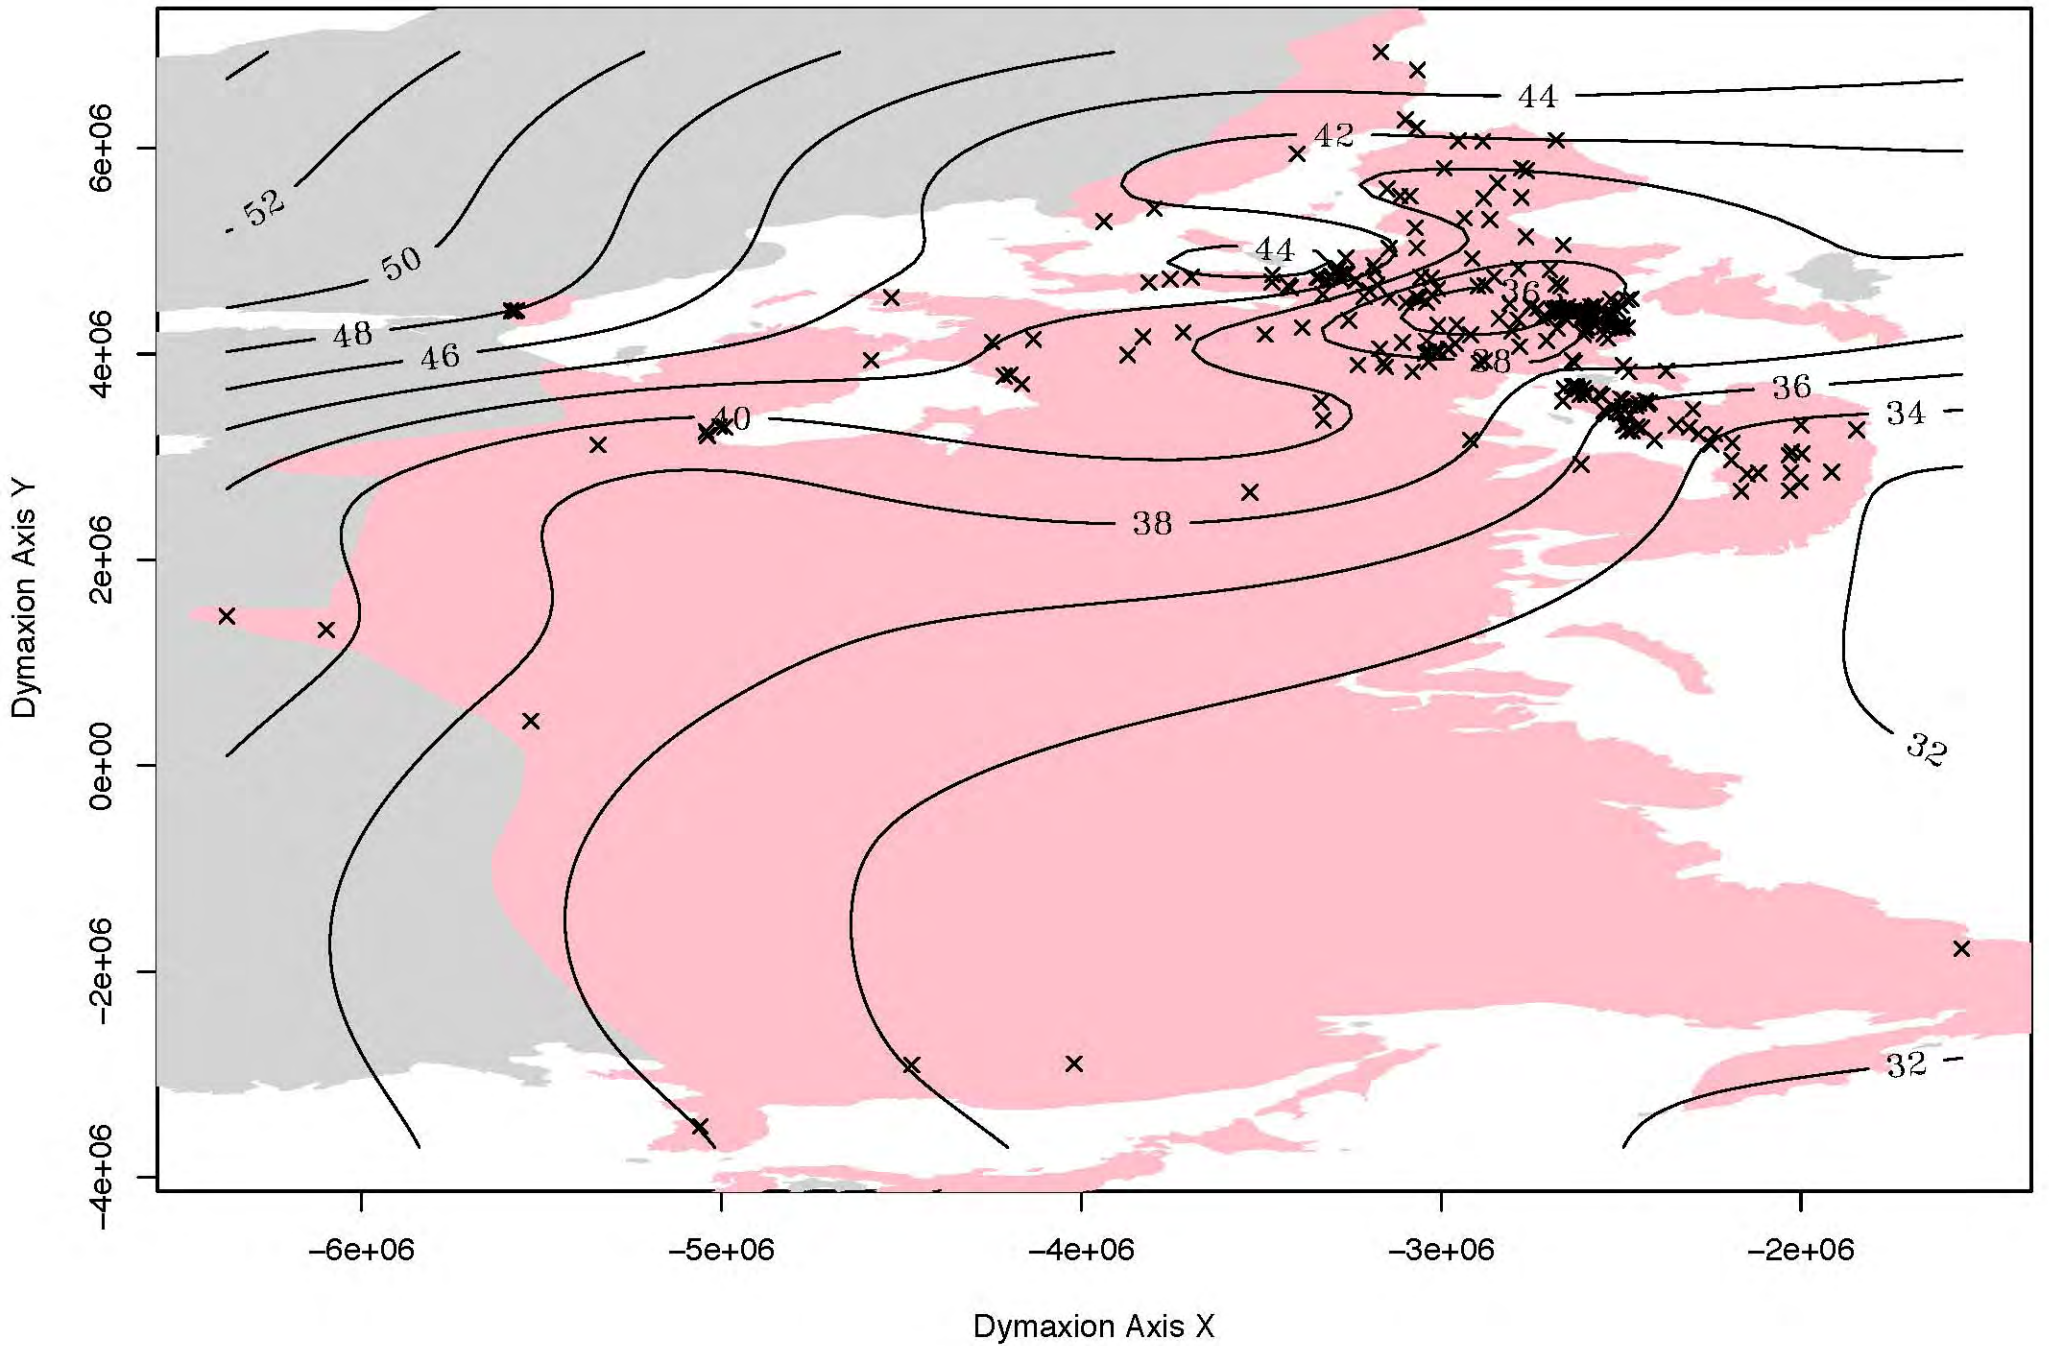



Marginal GAM Surface for CBL in female *Mustela nivalis* Palearctic

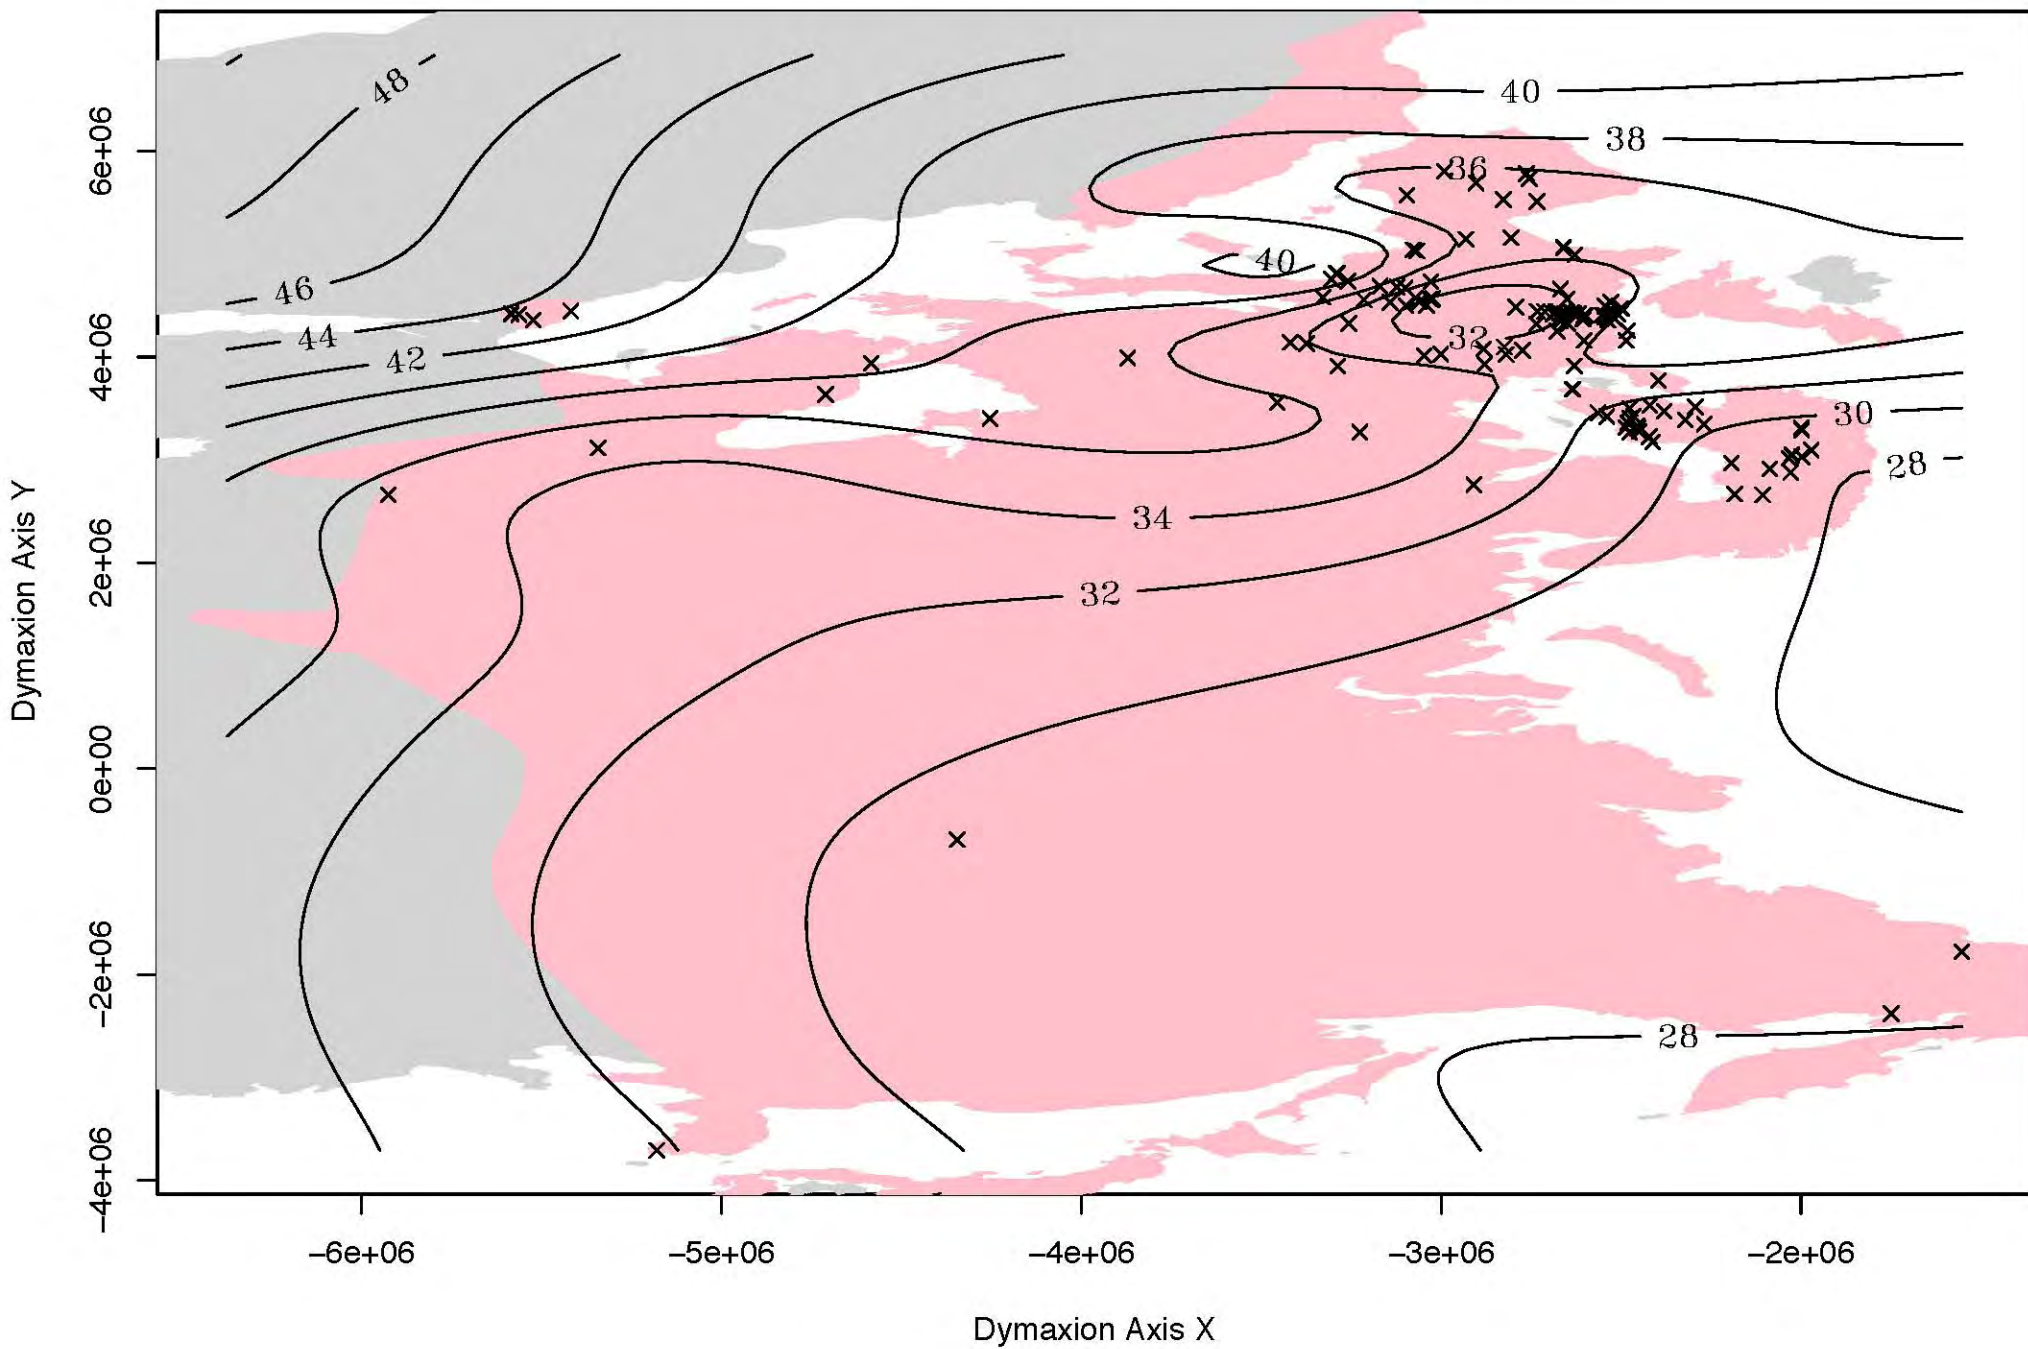

Marginal GAM Surface for CBL in male *Mustela putorius*

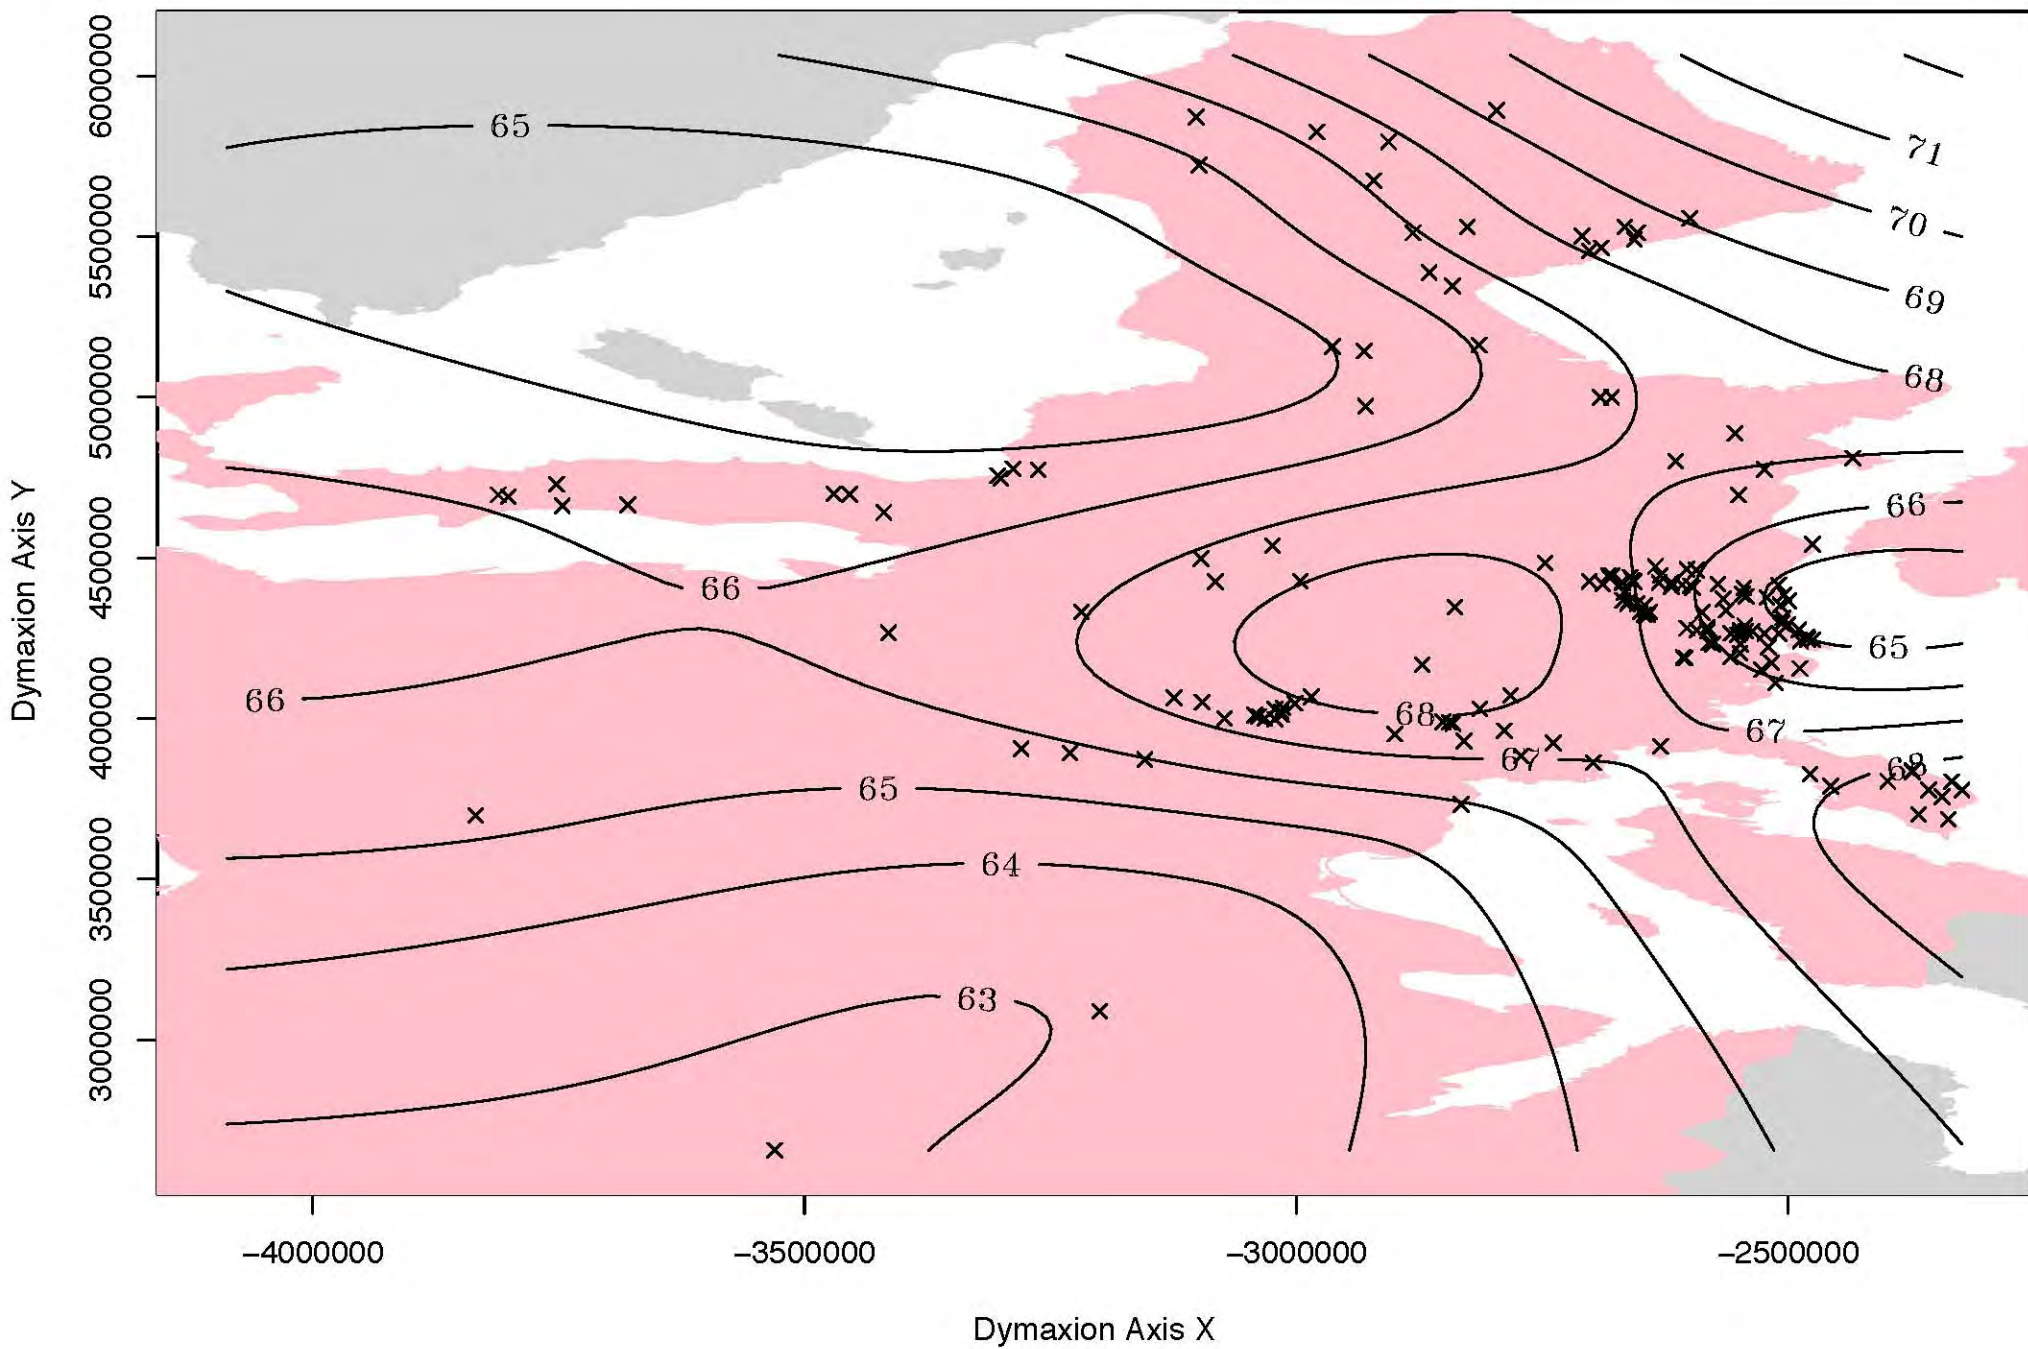



Marginal GAM Surface for CBL in female *Mustela putorius*

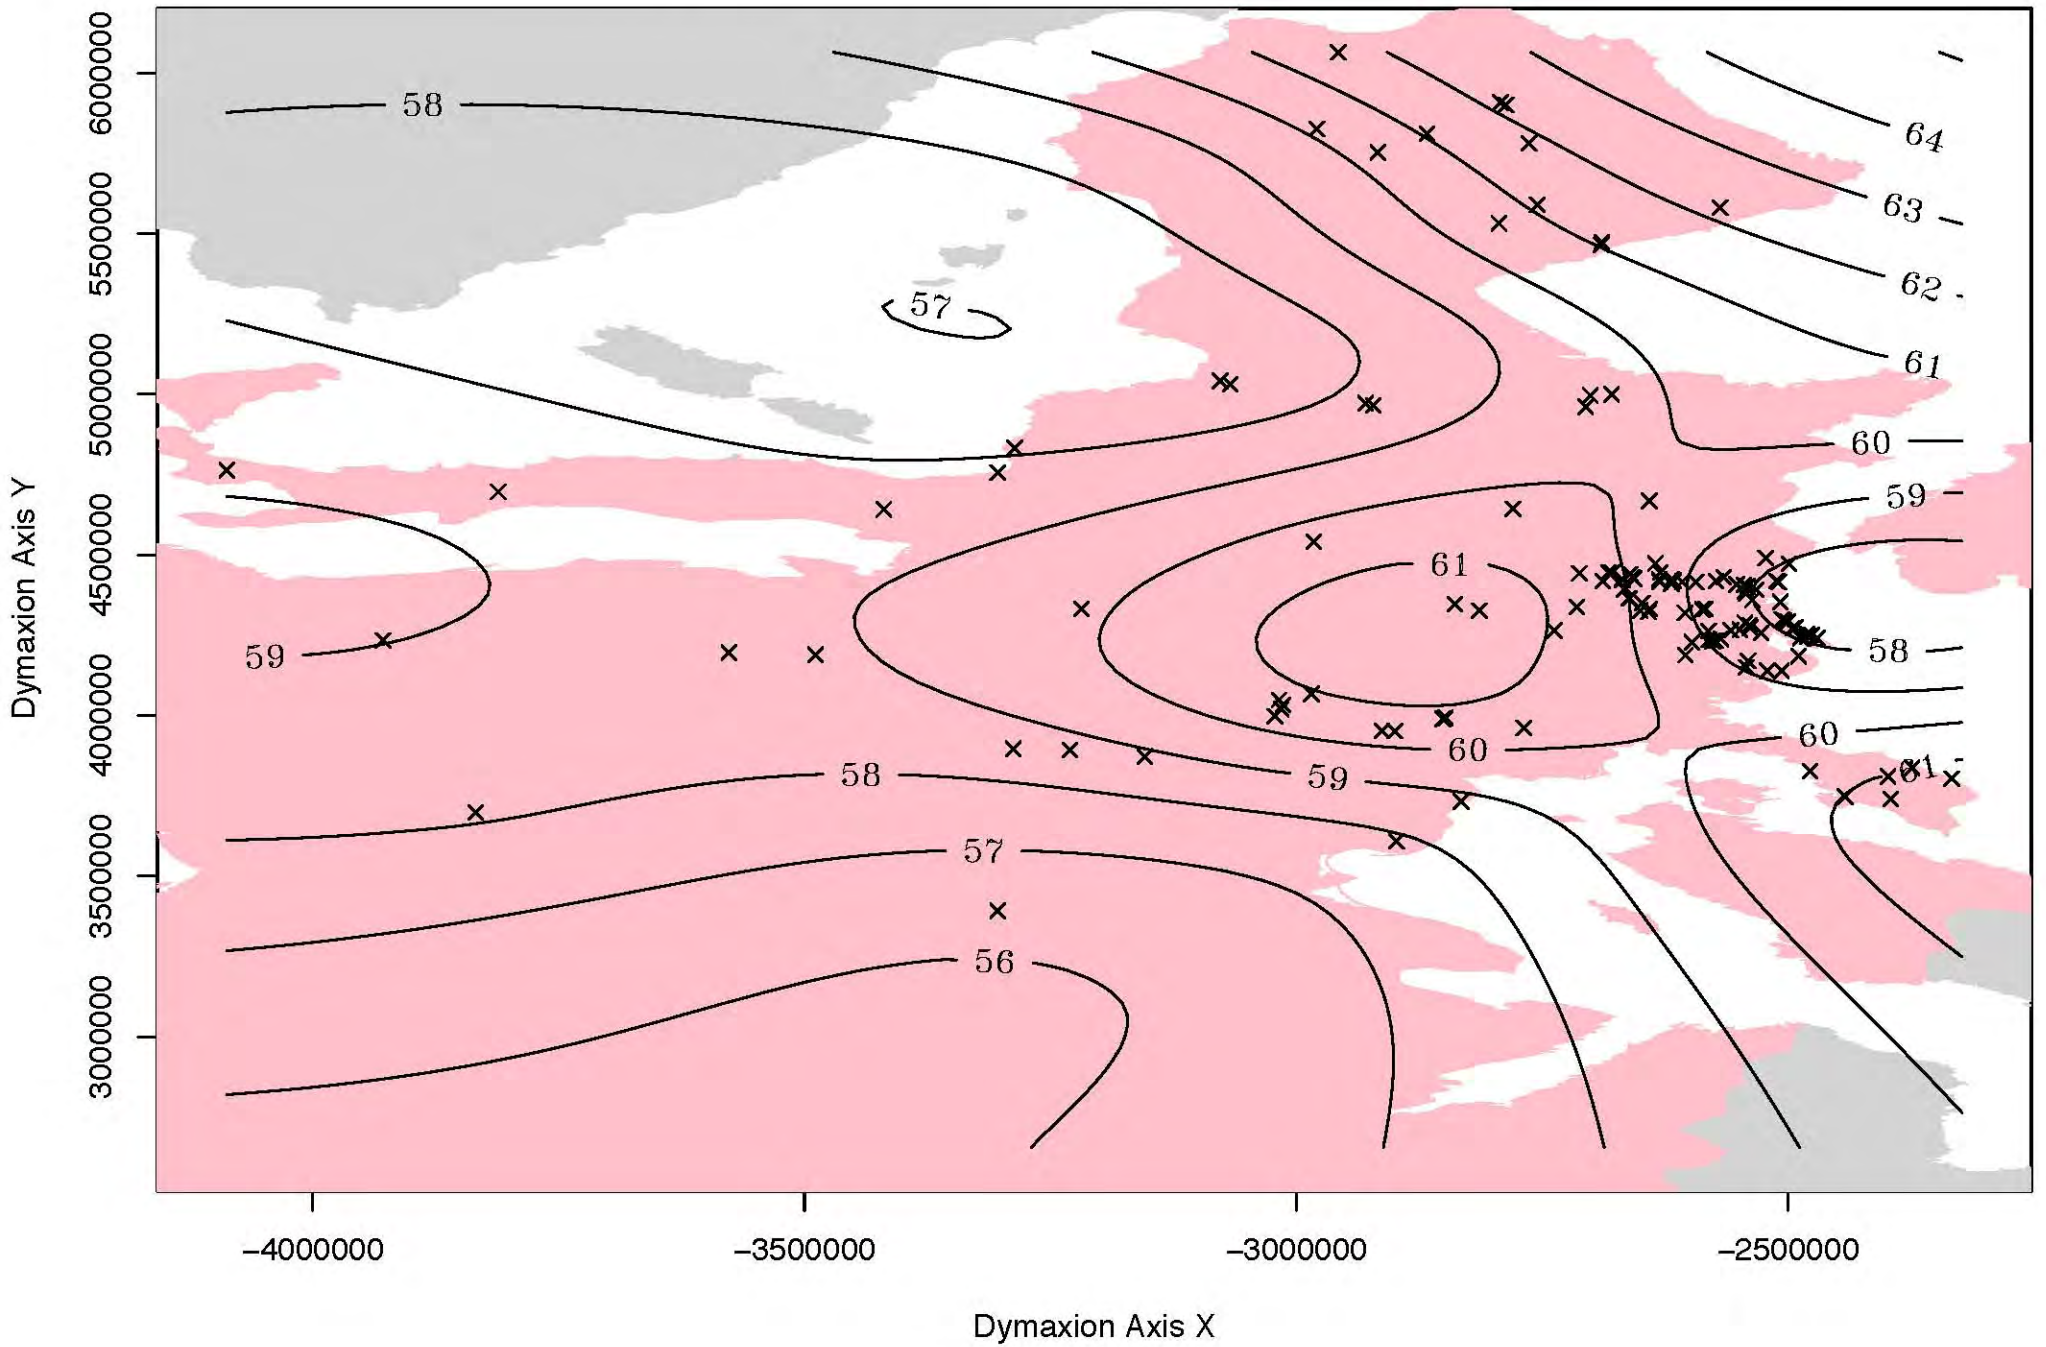



Marginal GAM Surface for CBL in male *Mustela vison*

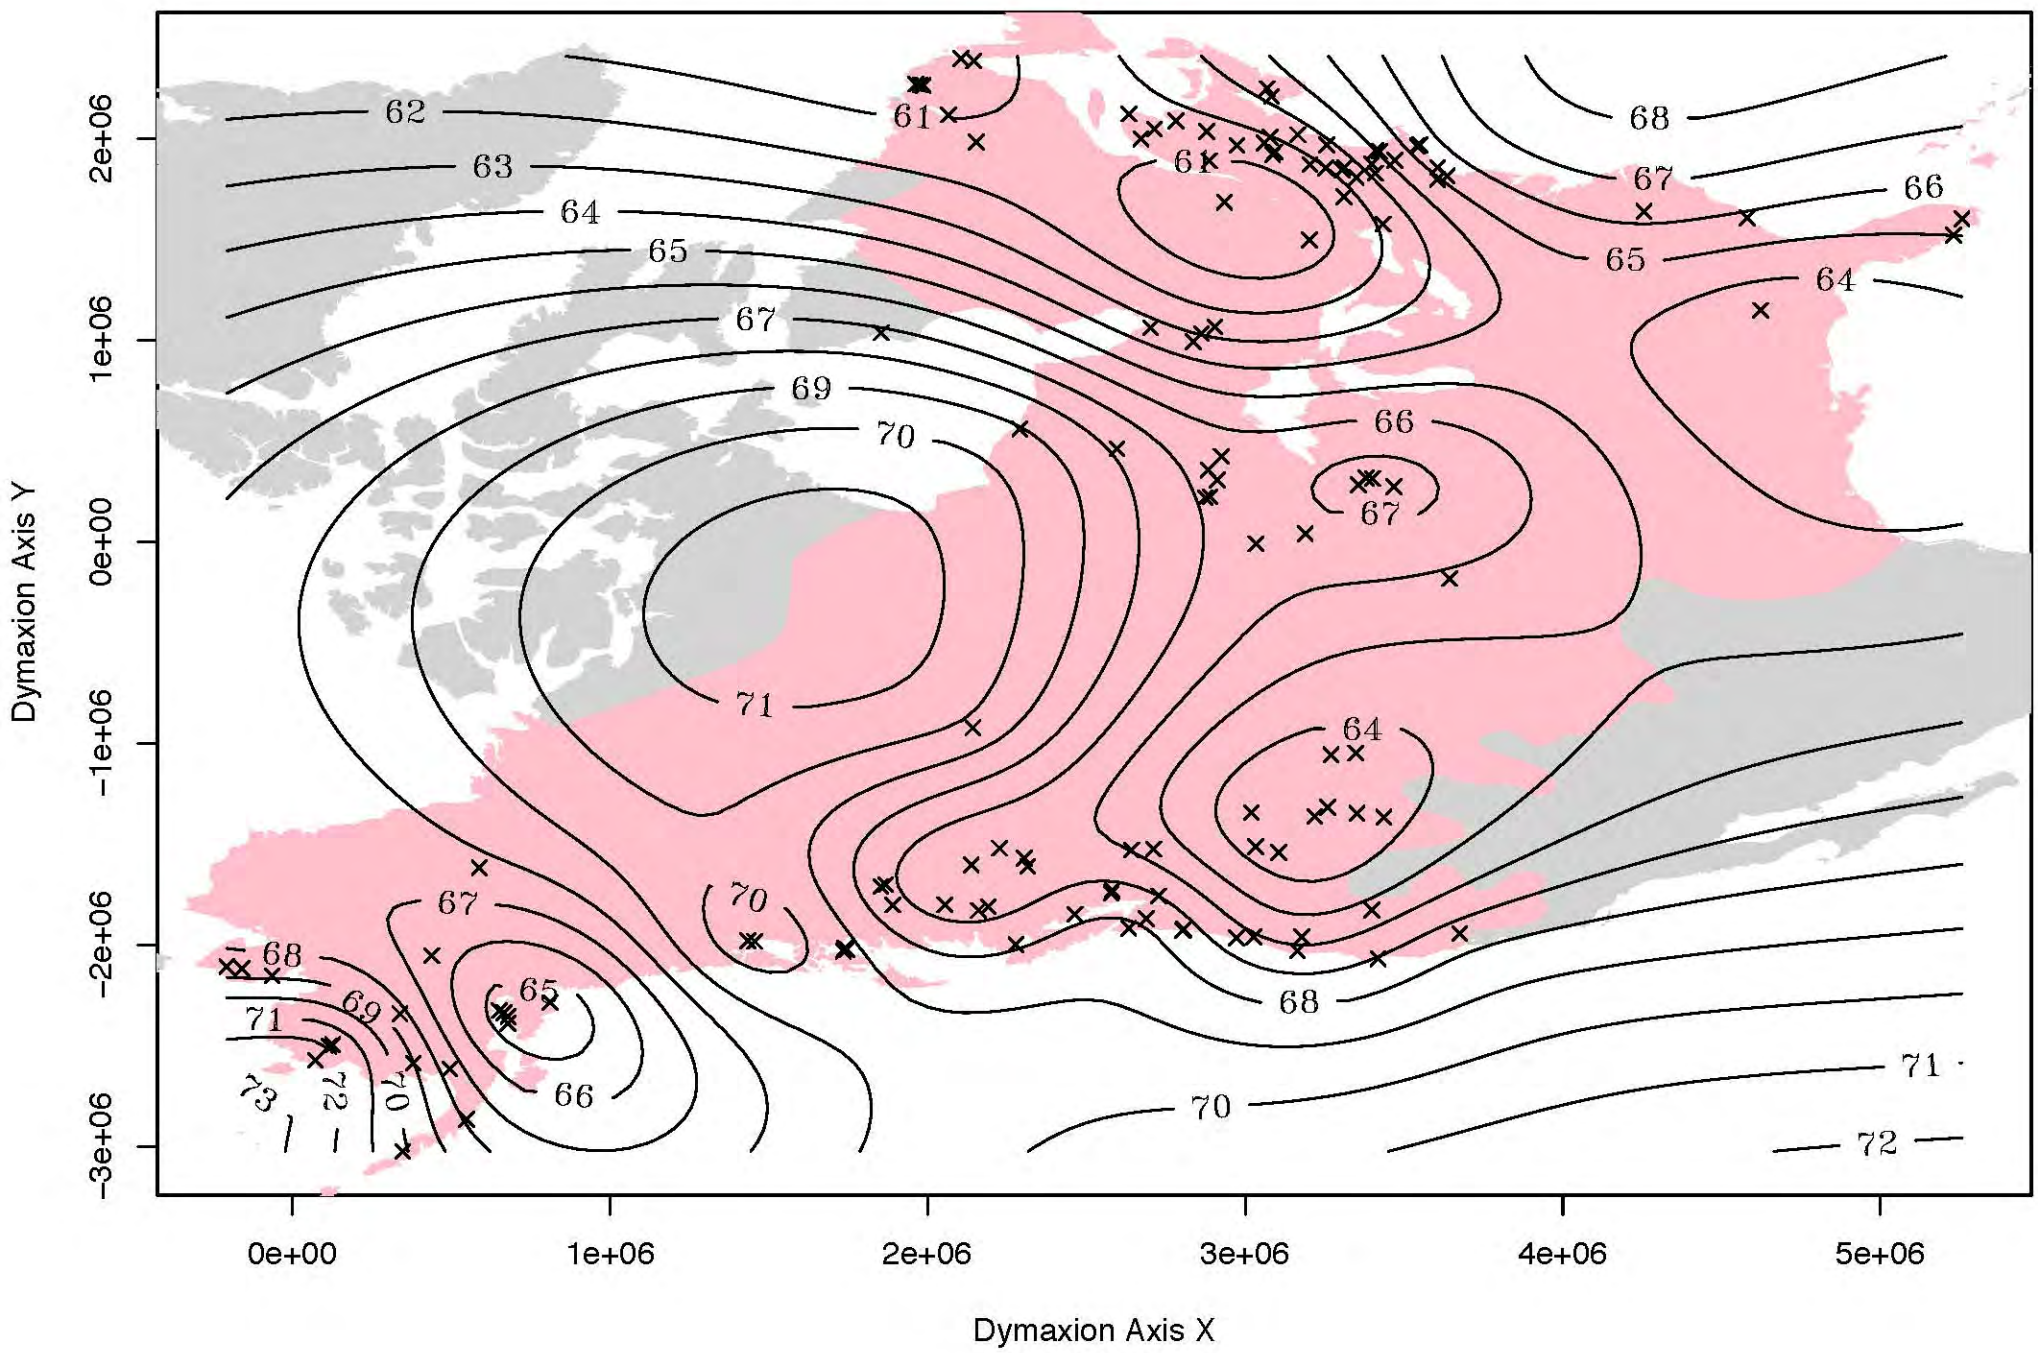



Marginal GAM Surface for CBL in female *Mustela vison*

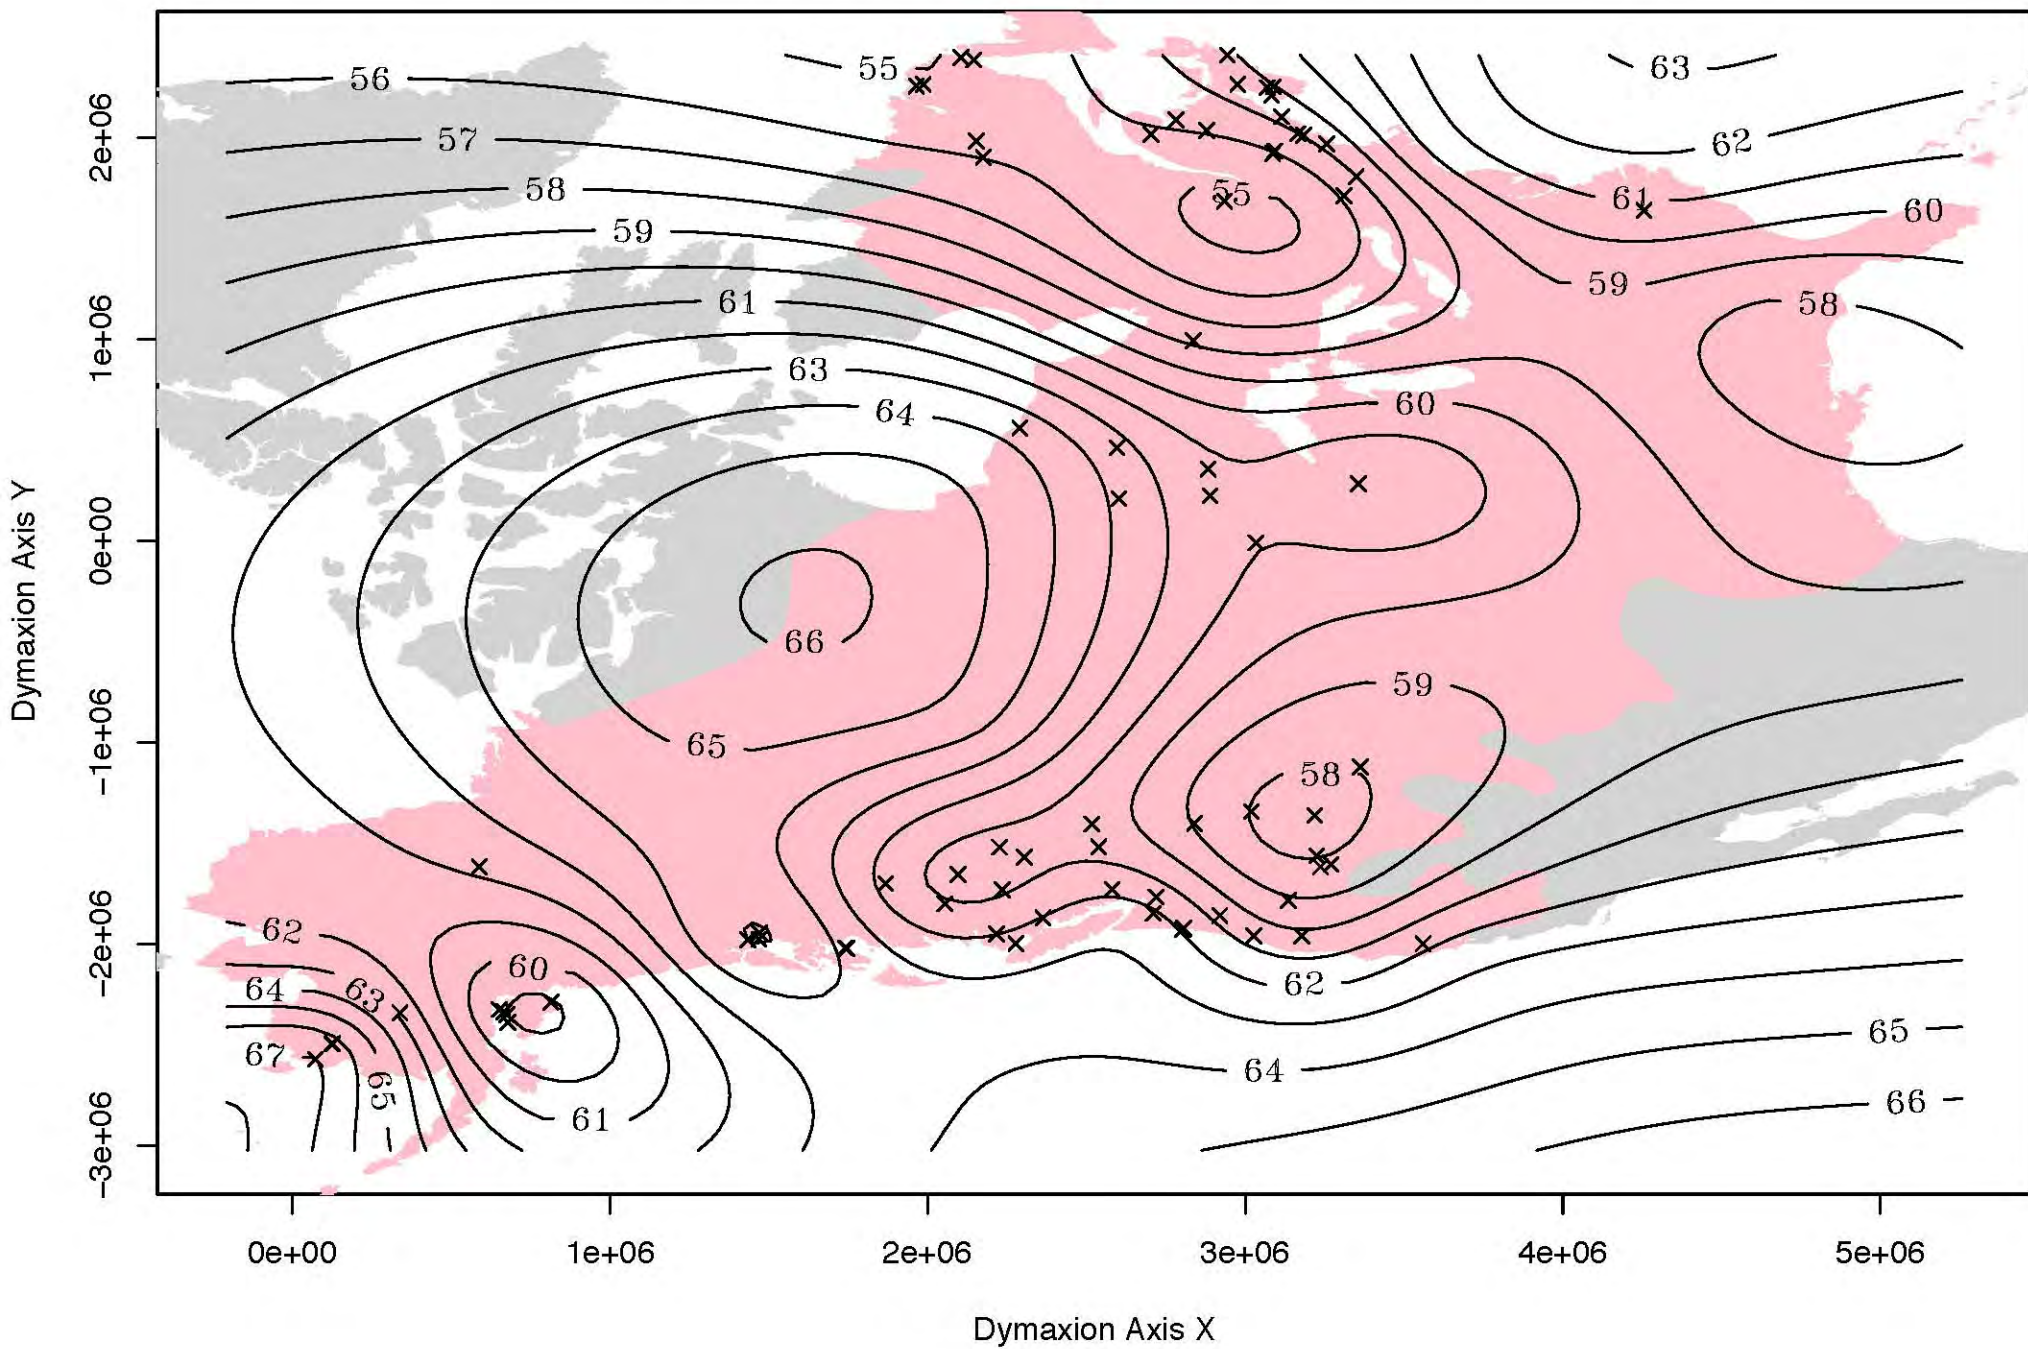

Marginal GAM Surface for CBL in male *Paradoxurus hermaphroditus*

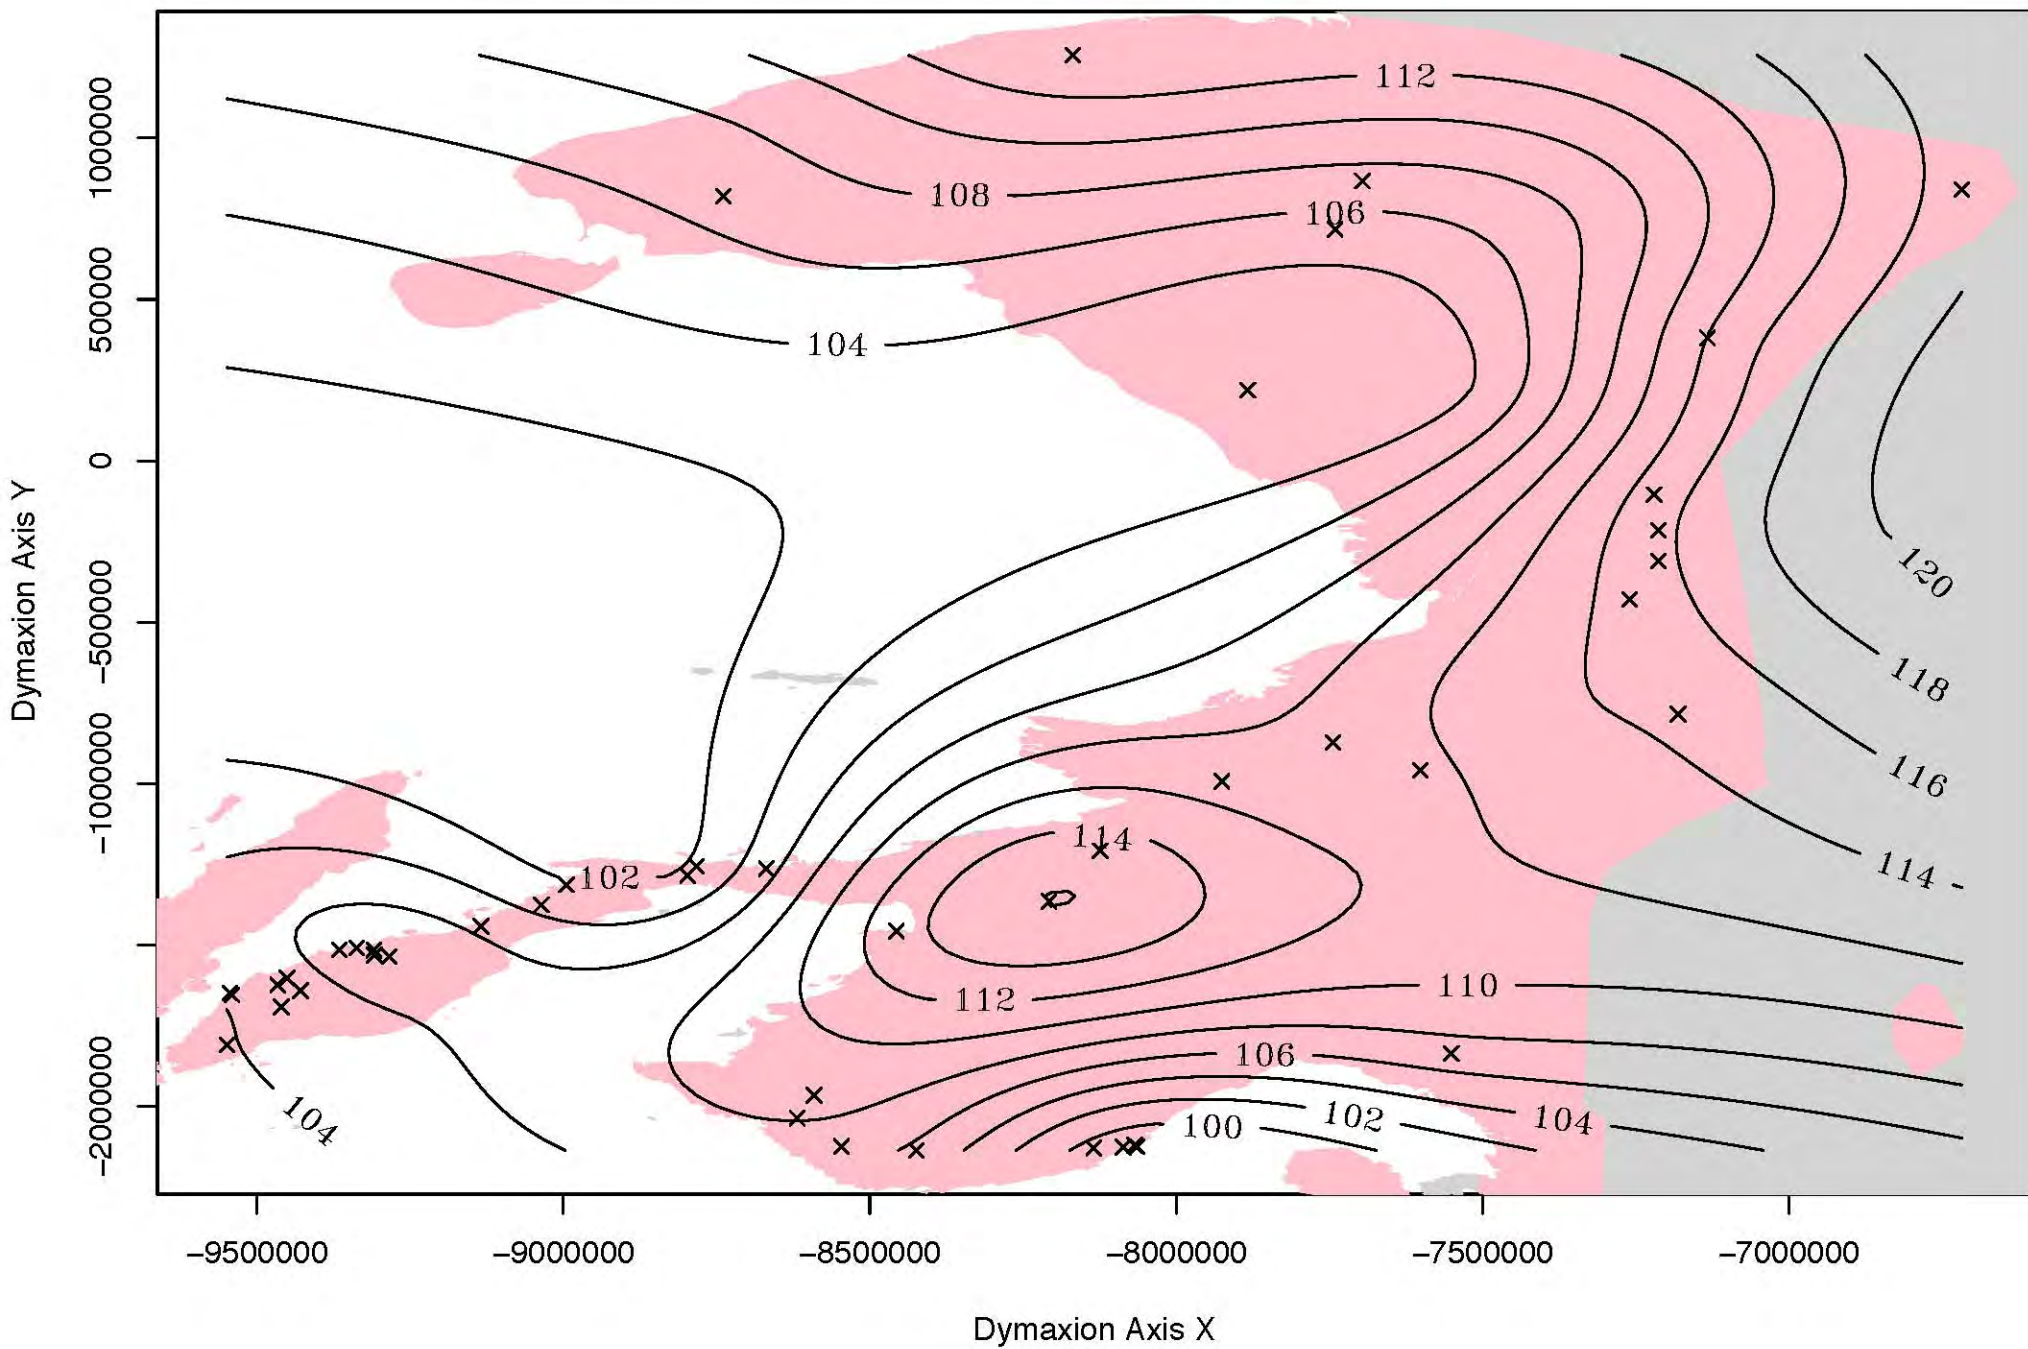



Marginal GAM Surface for CBL in female *Paradoxurus hermaphroditus*

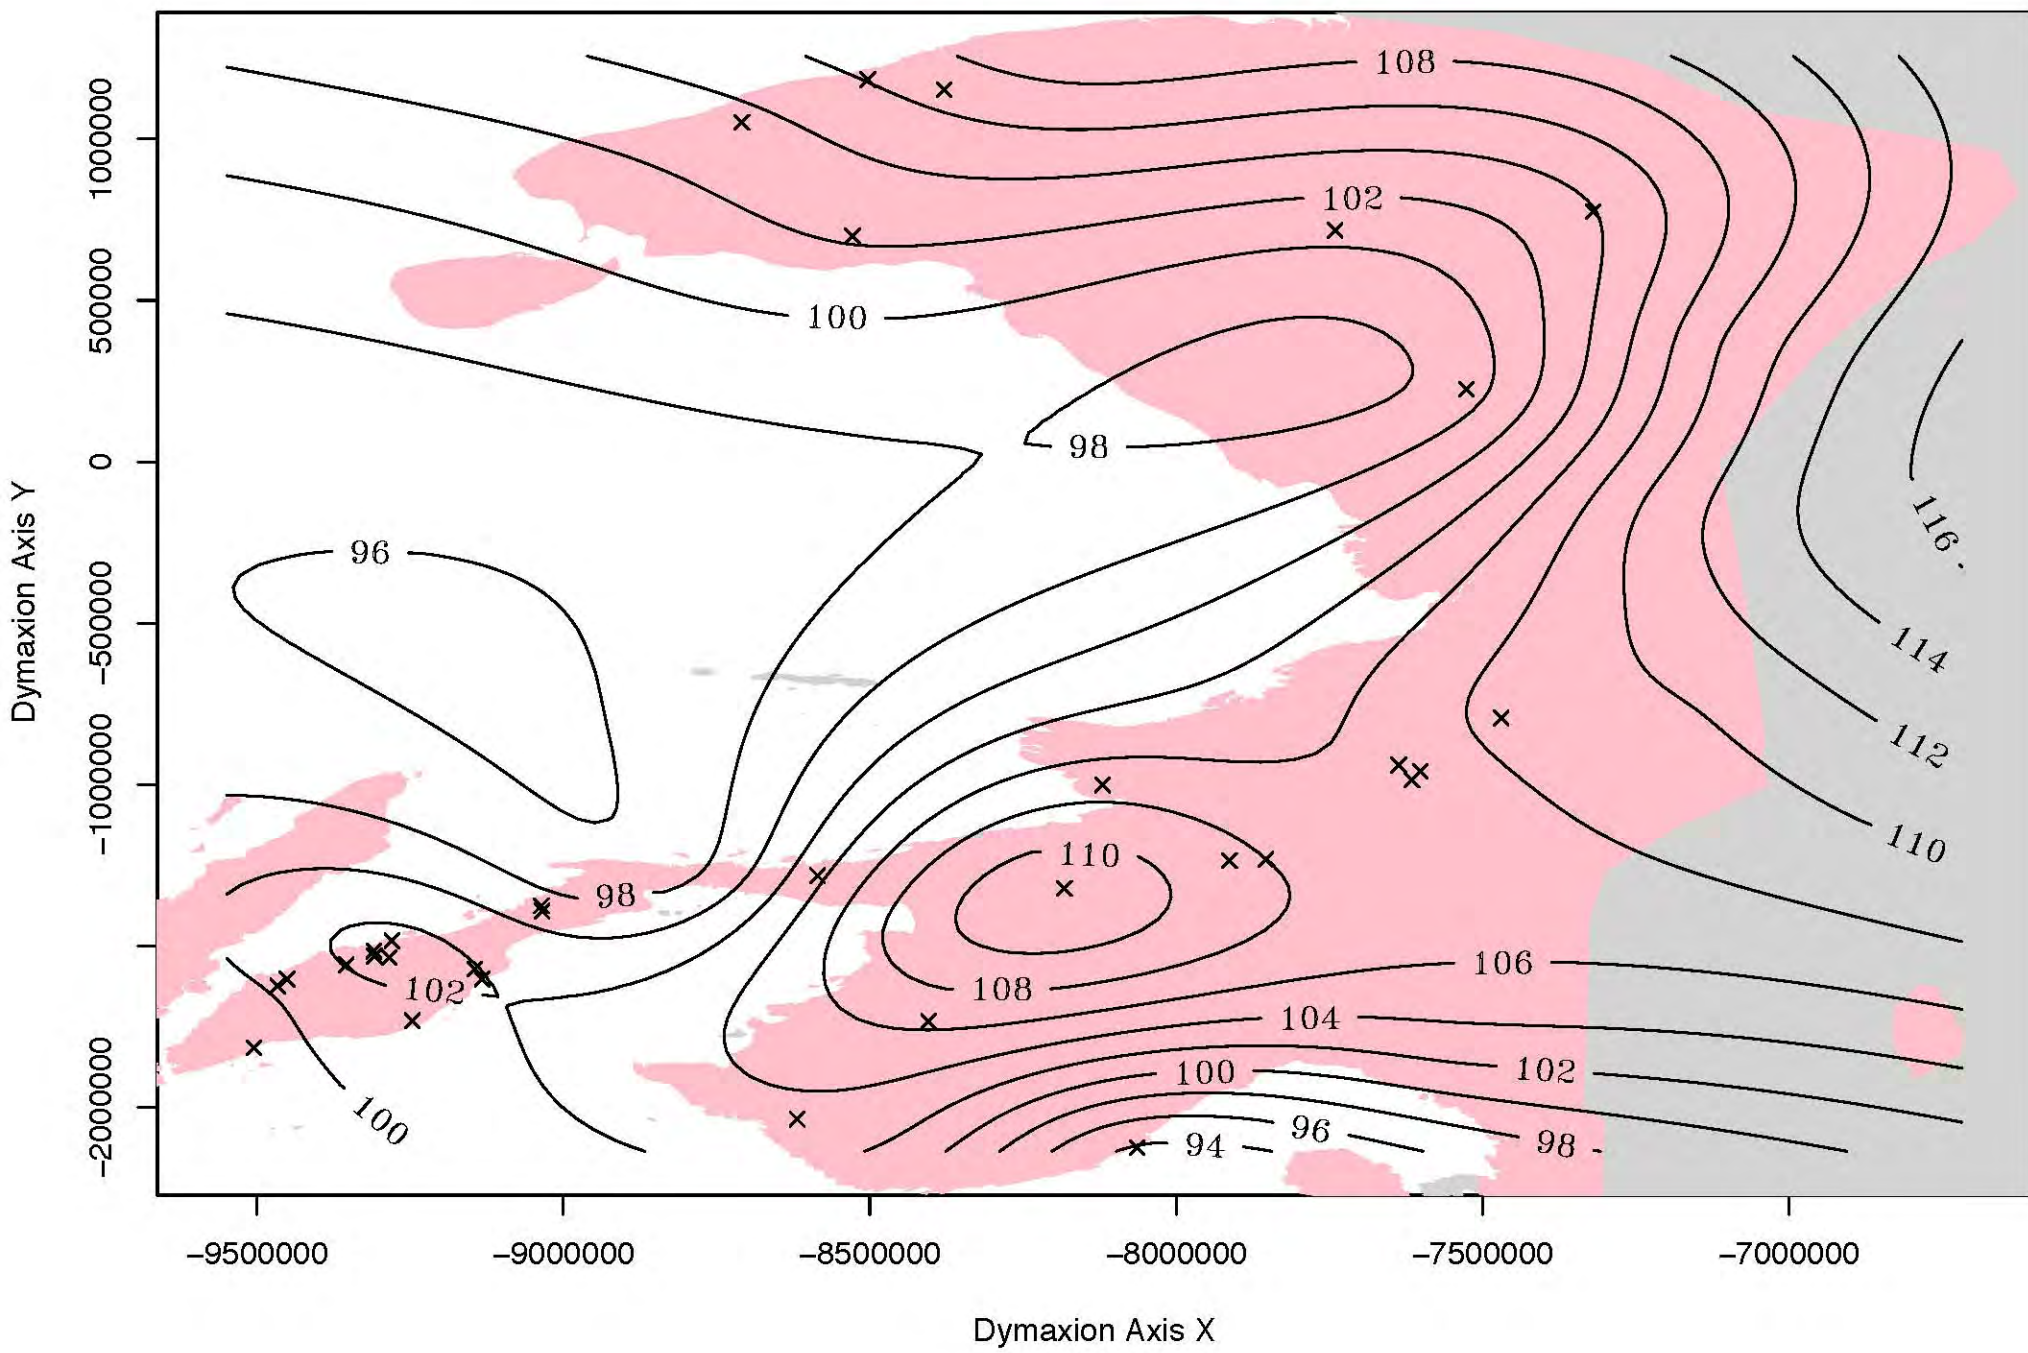

# Marginal GAM Surface for CBL in male *Procyon lotor*

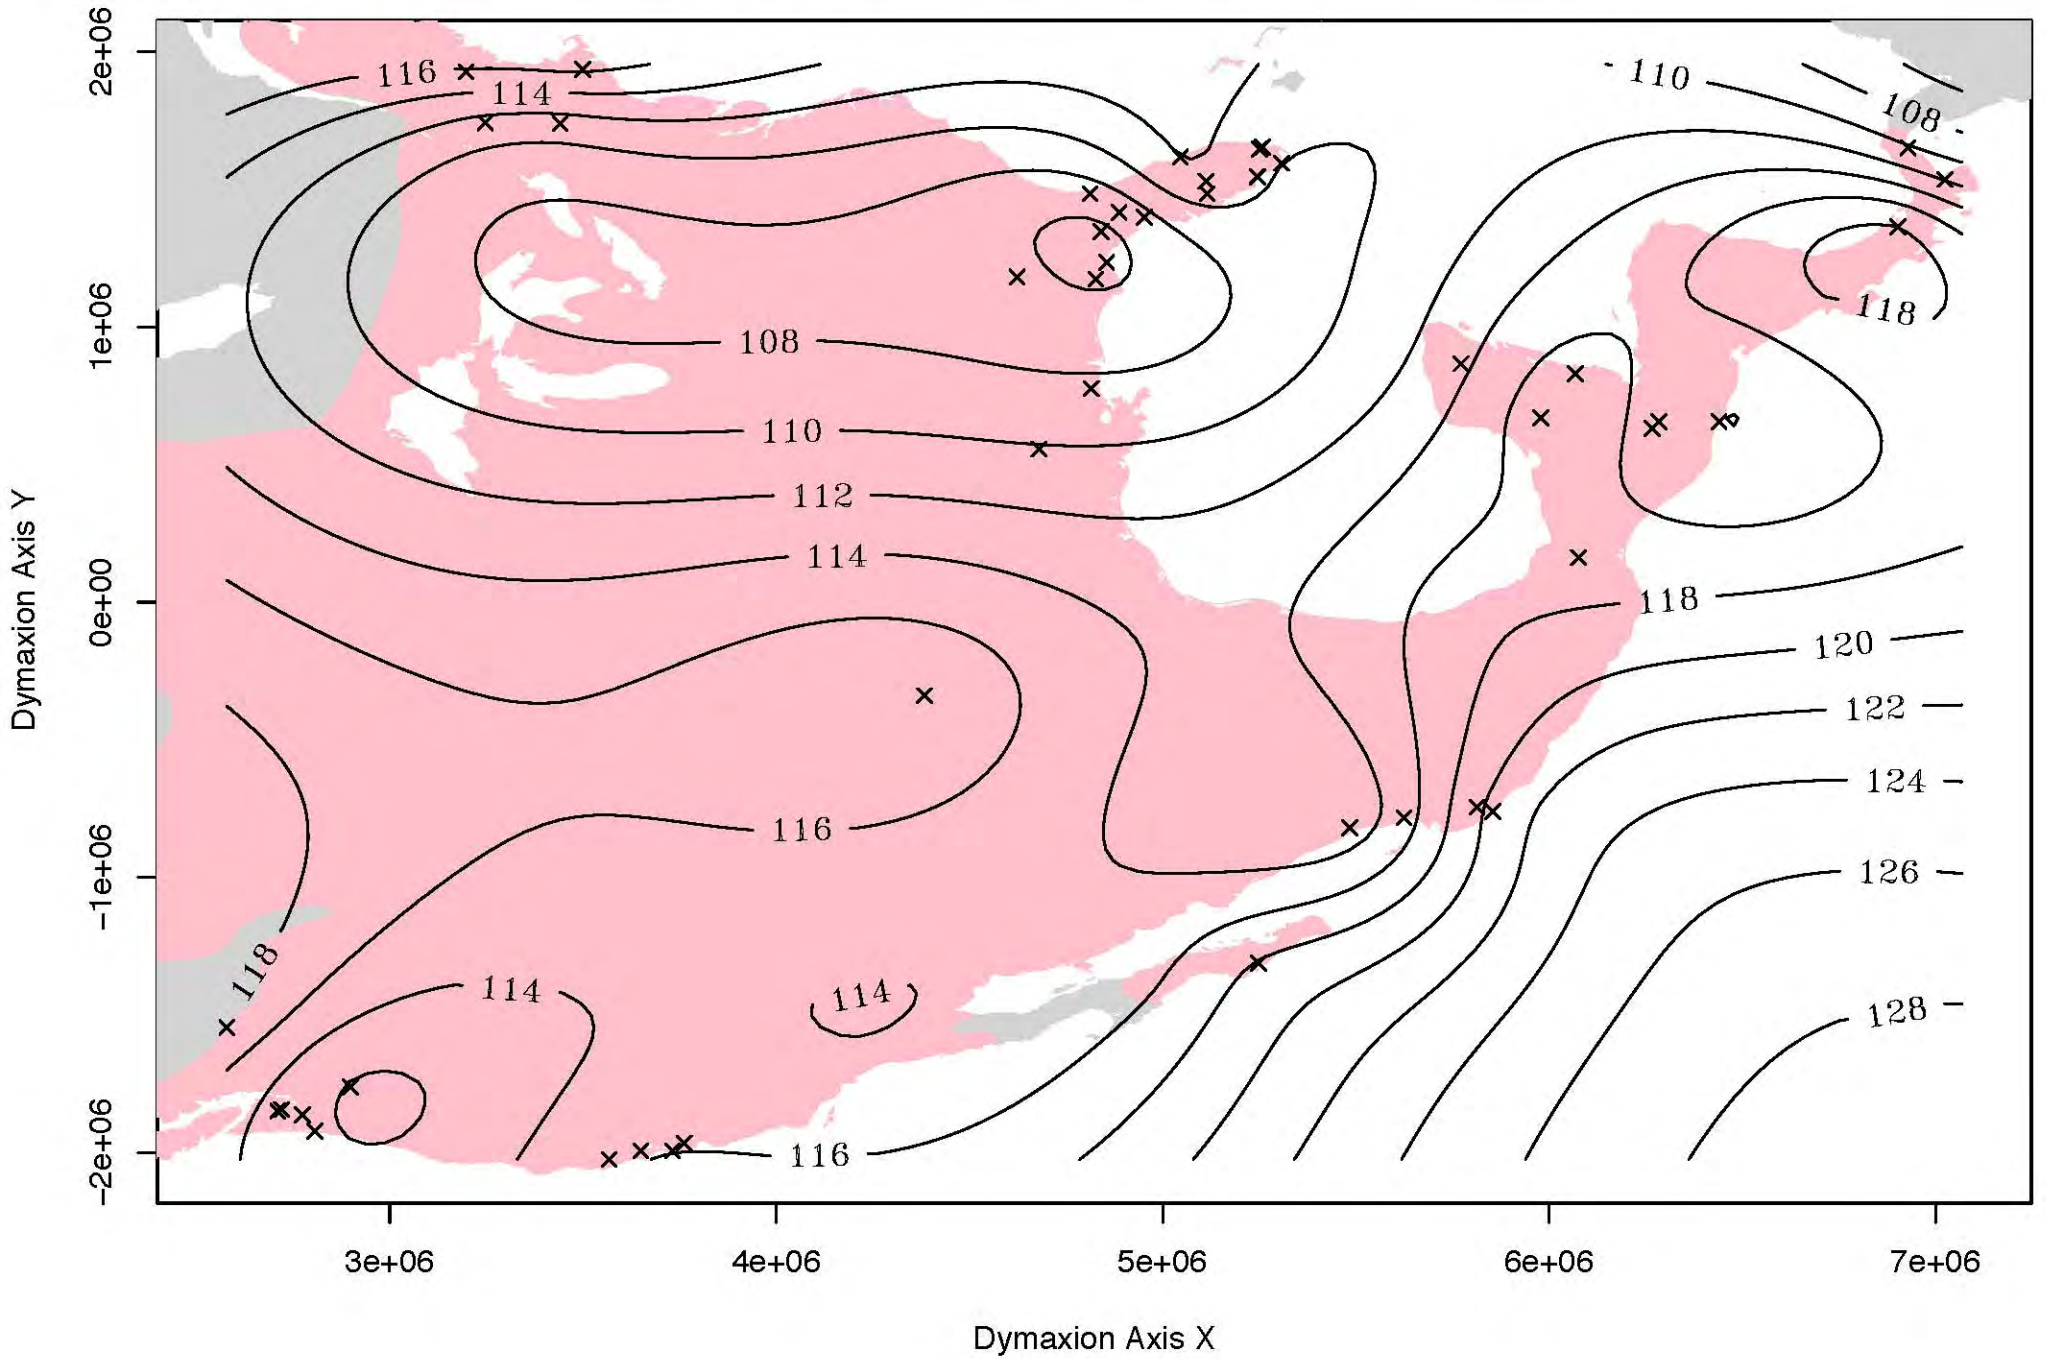



Marginal GAM Surface for CBL in female *Procyon lotor*

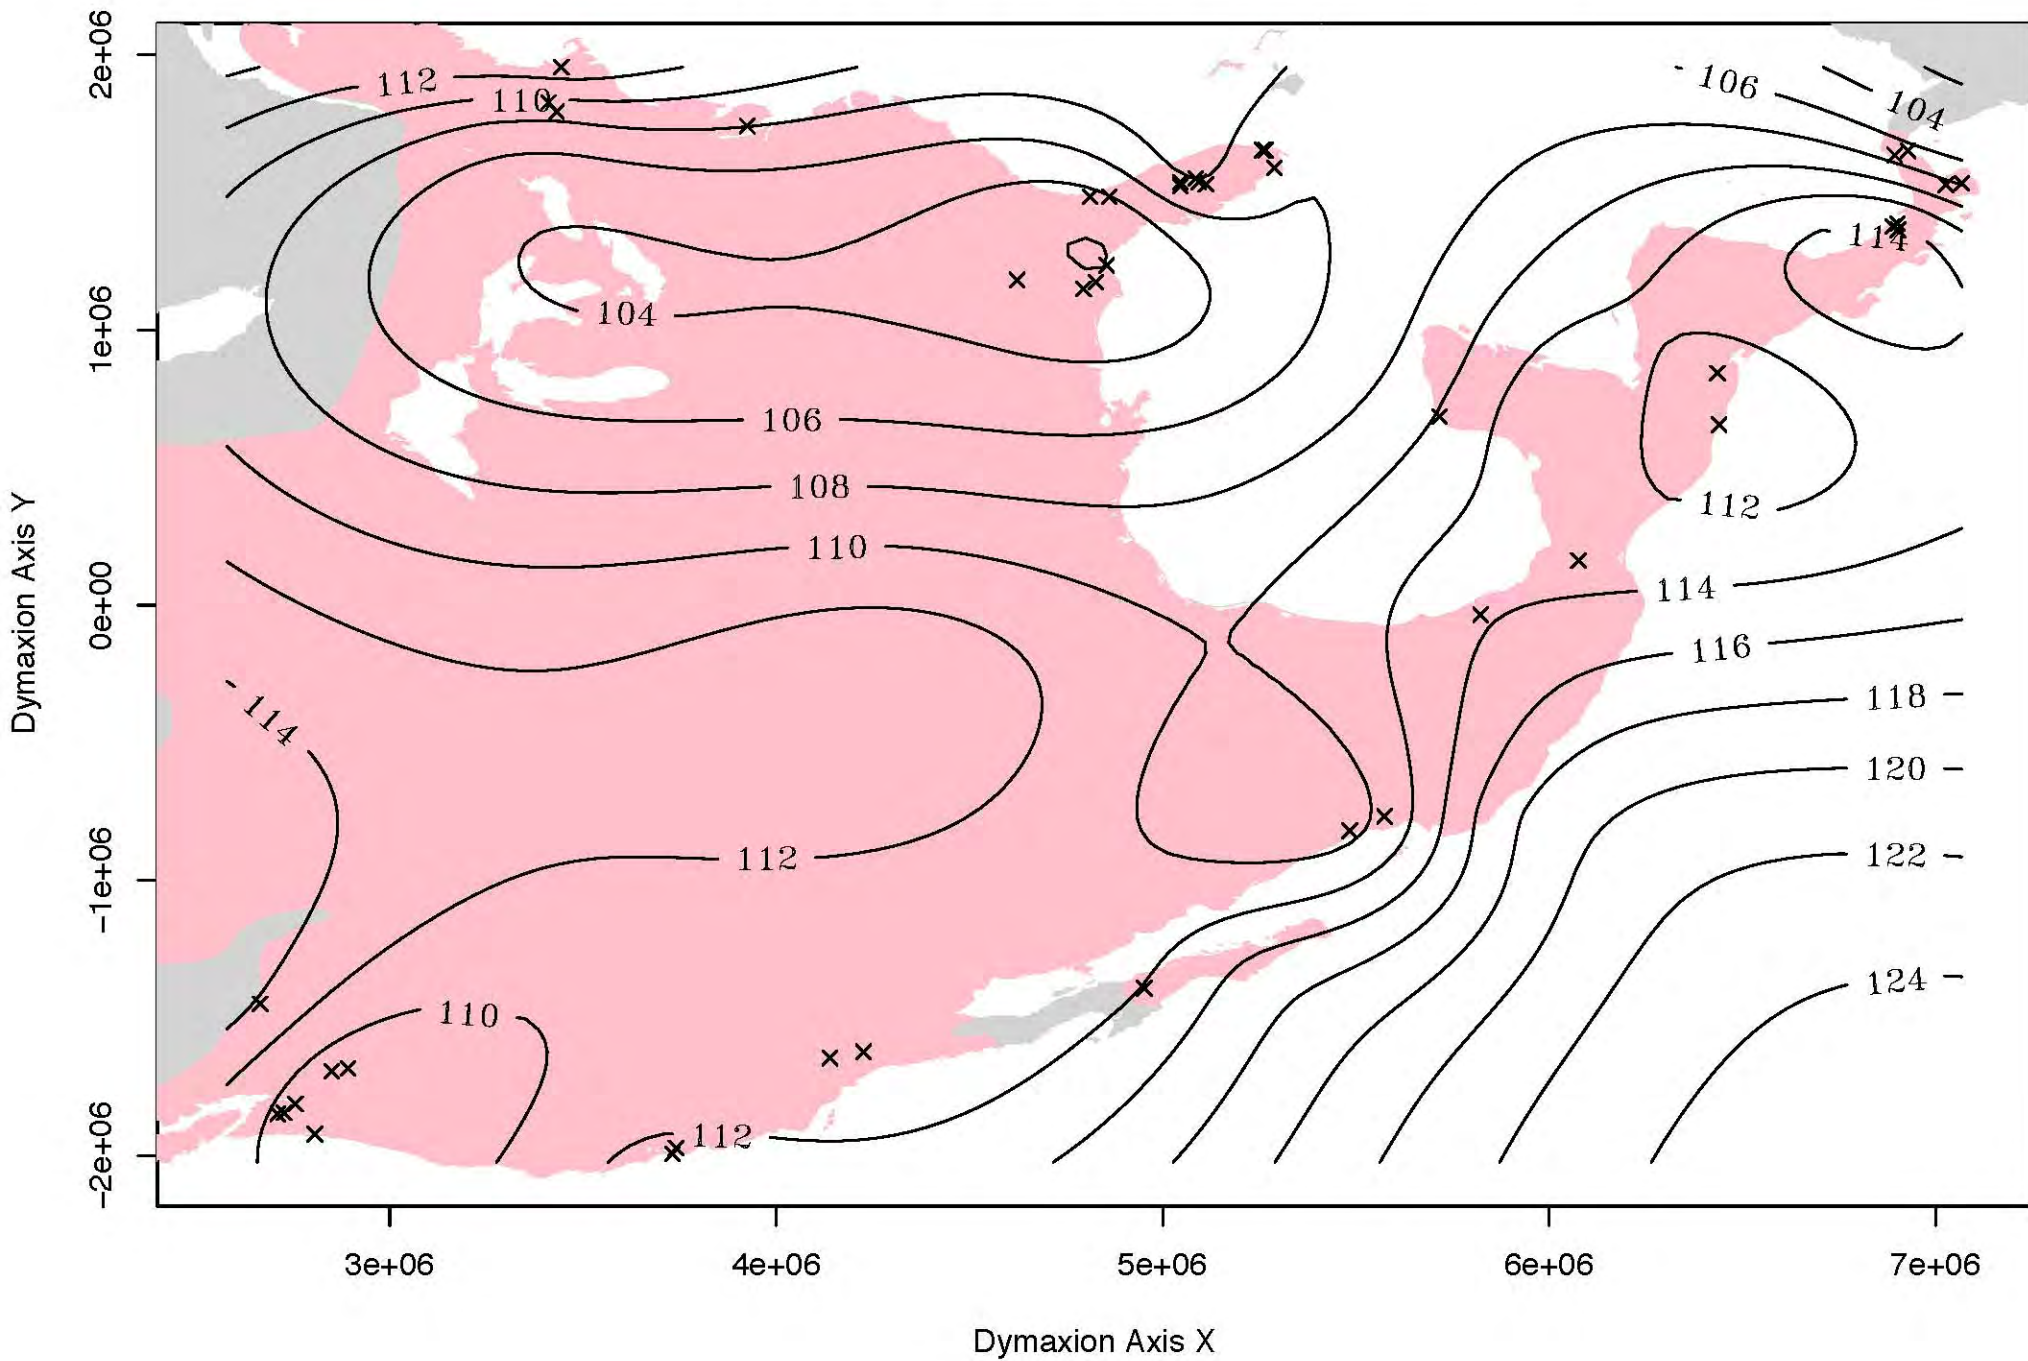



# Marginal GAM Surface for CBL in male *Spilogale gracilis*

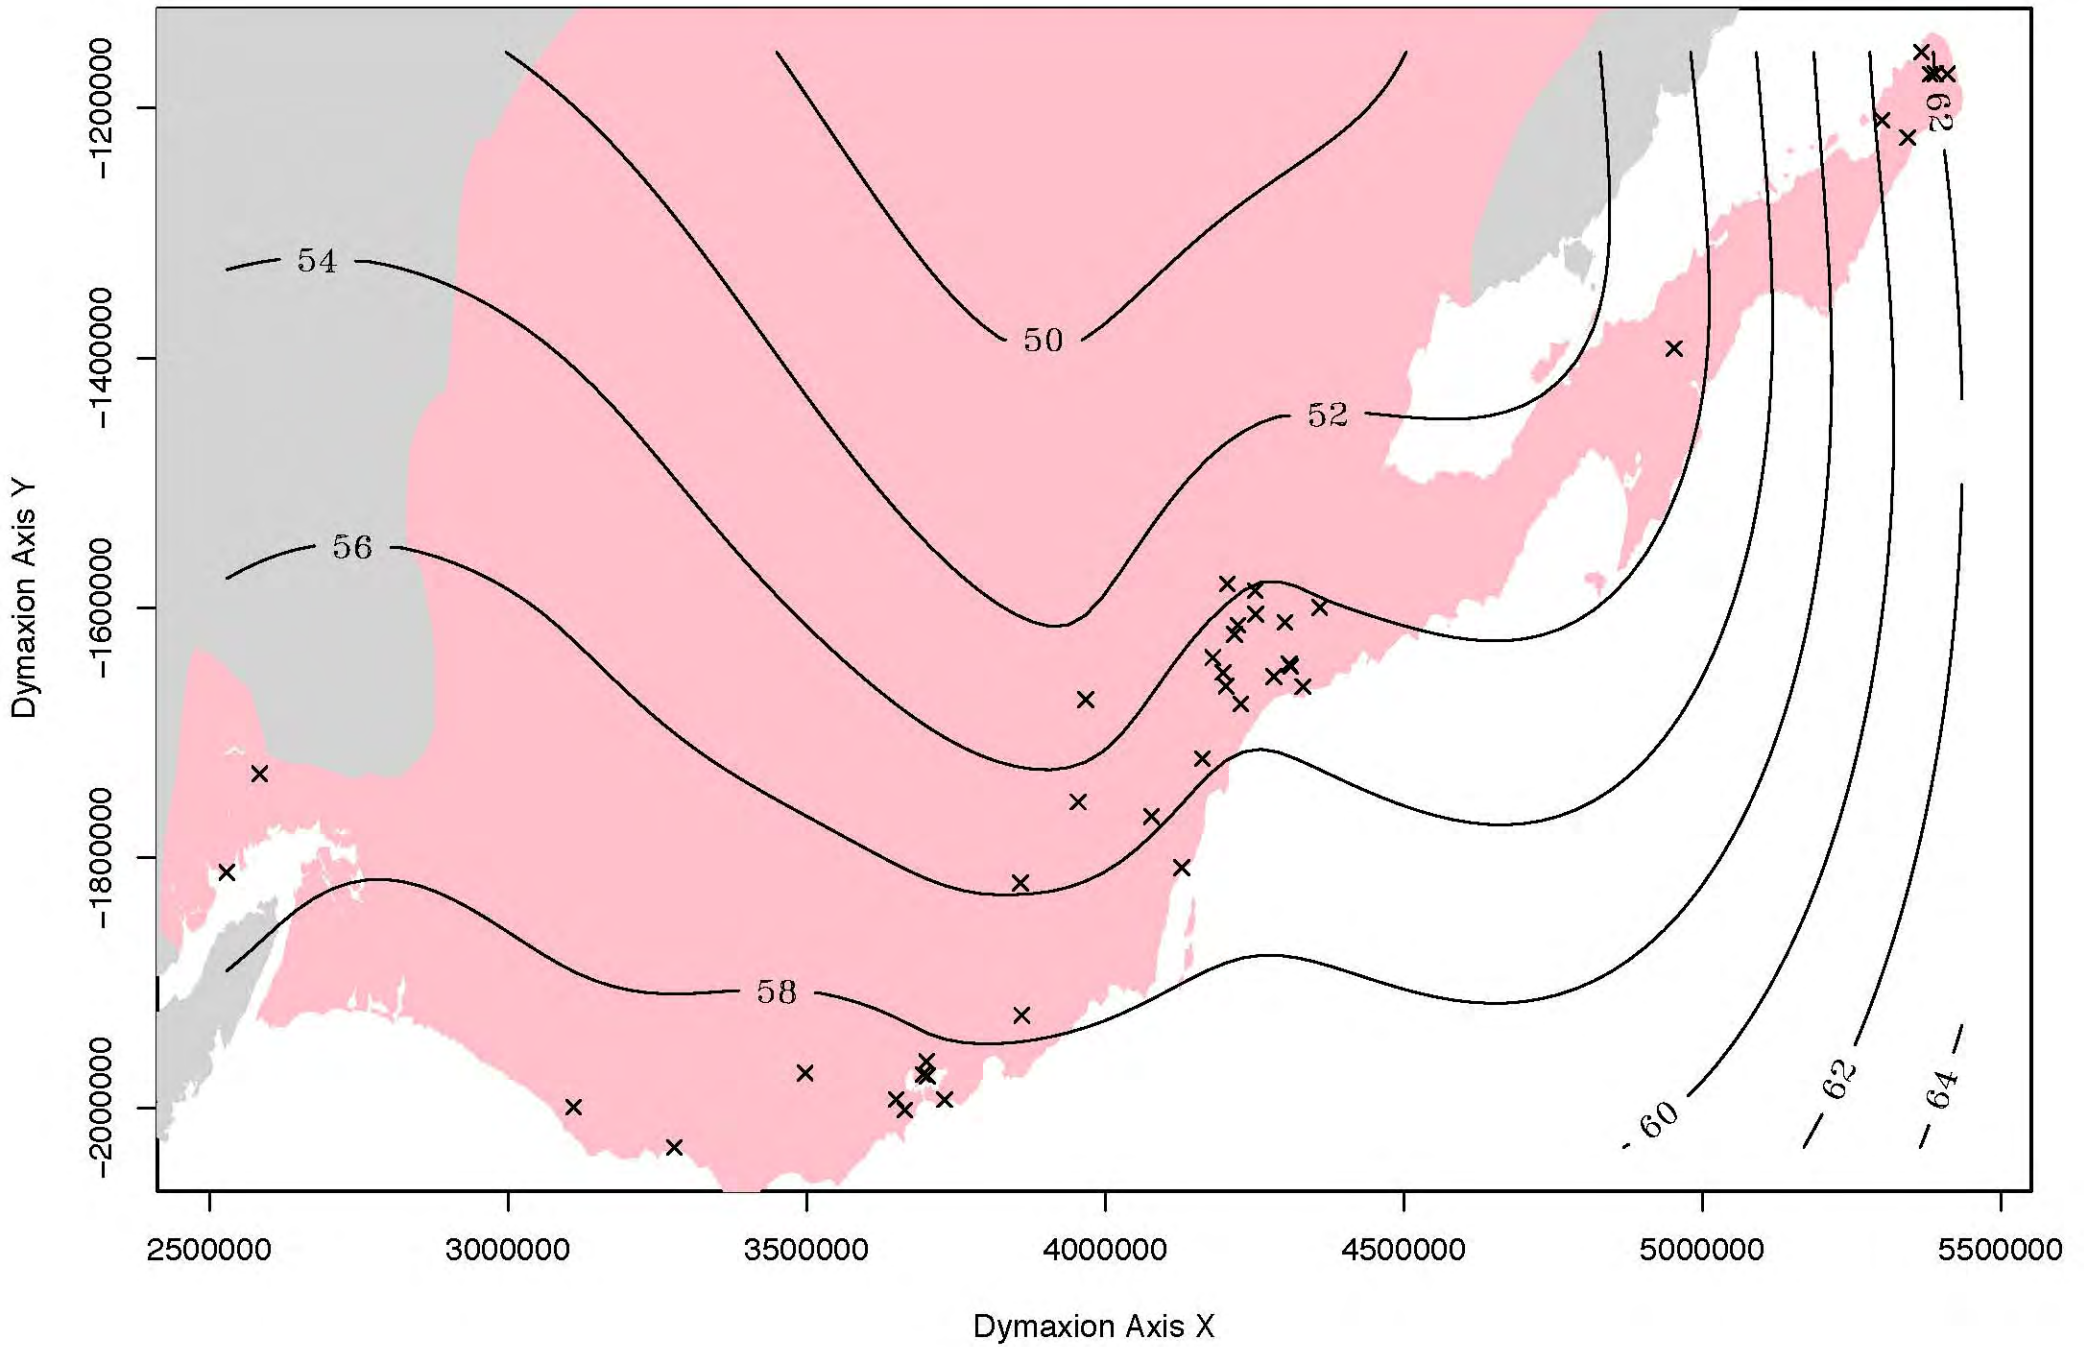

Marginal GAM Surface for CBL in female *Spilogale gracilis*

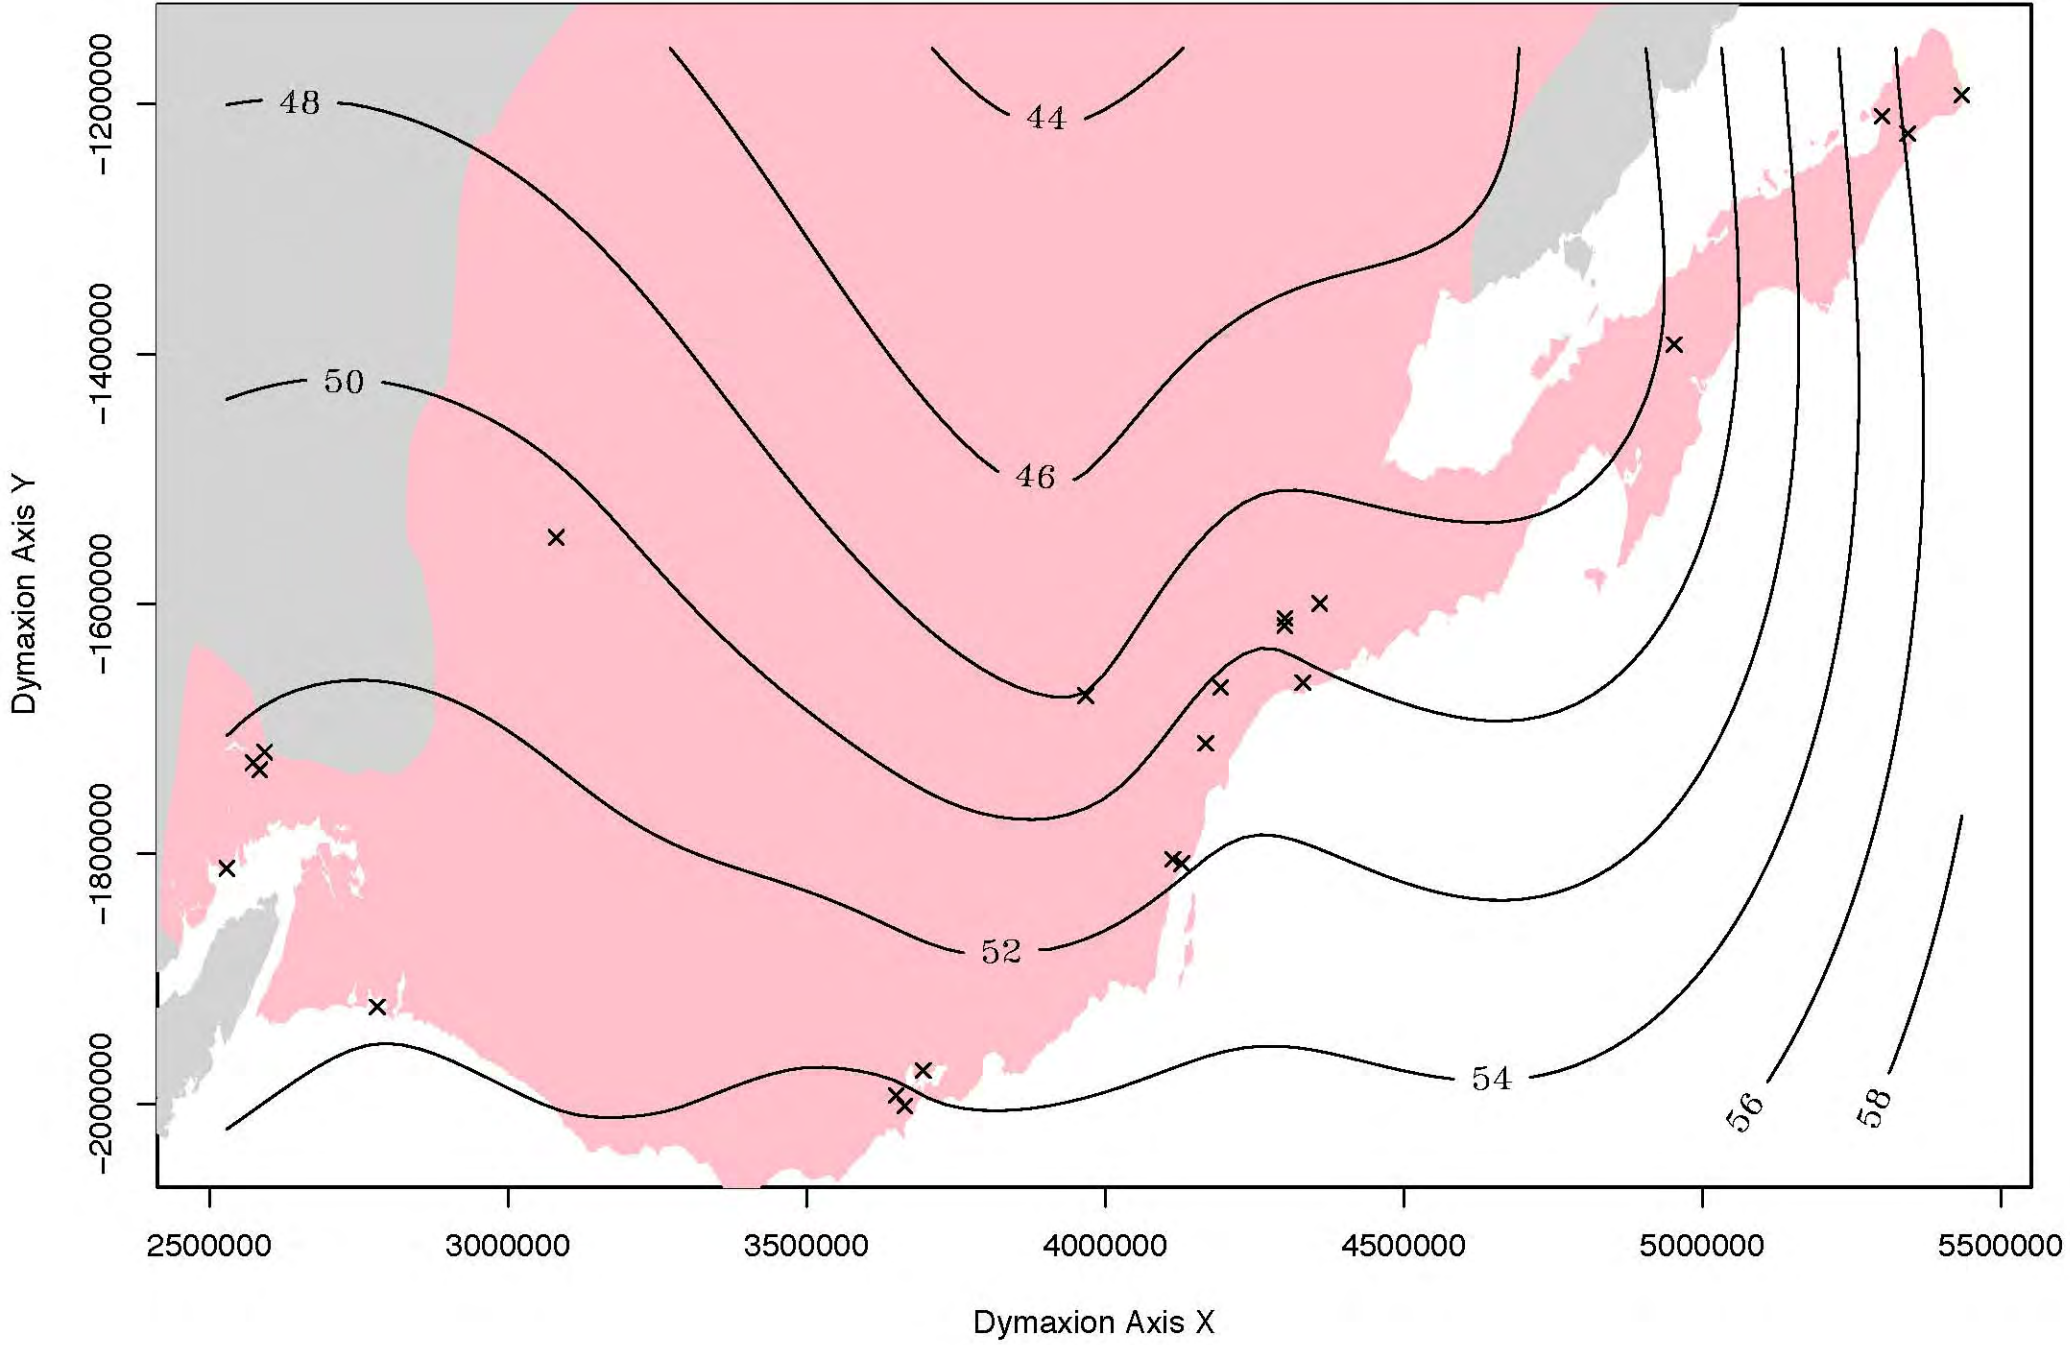

Marginal GAM Surface for CBL in male *Urocyon cinereoargenteus*

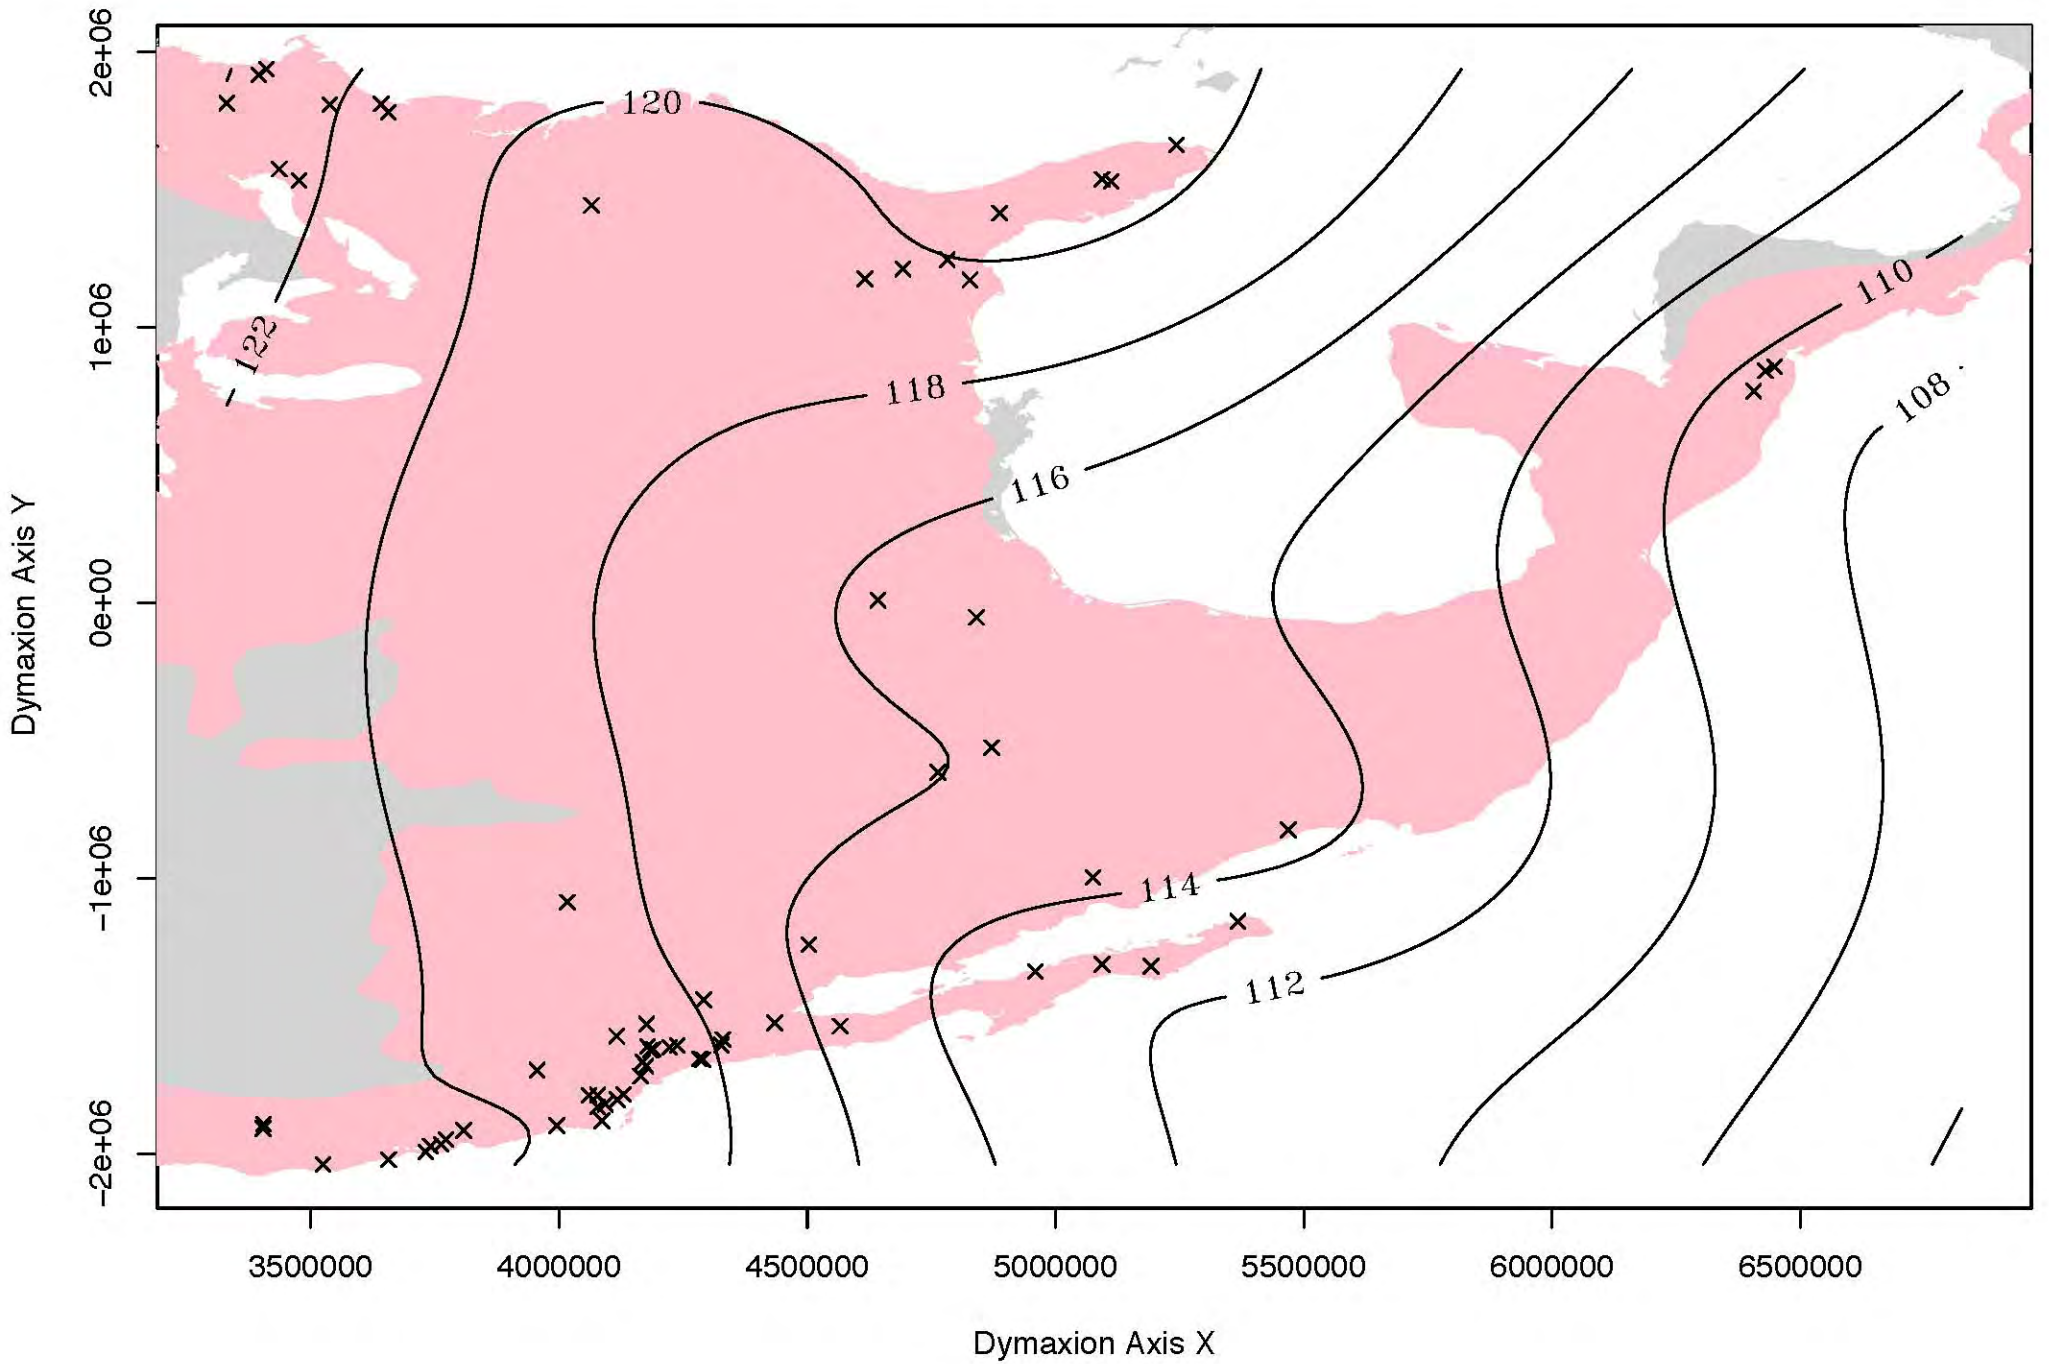



Marginal GAM Surface for CBL in female *Urocyon cinereoargenteus*

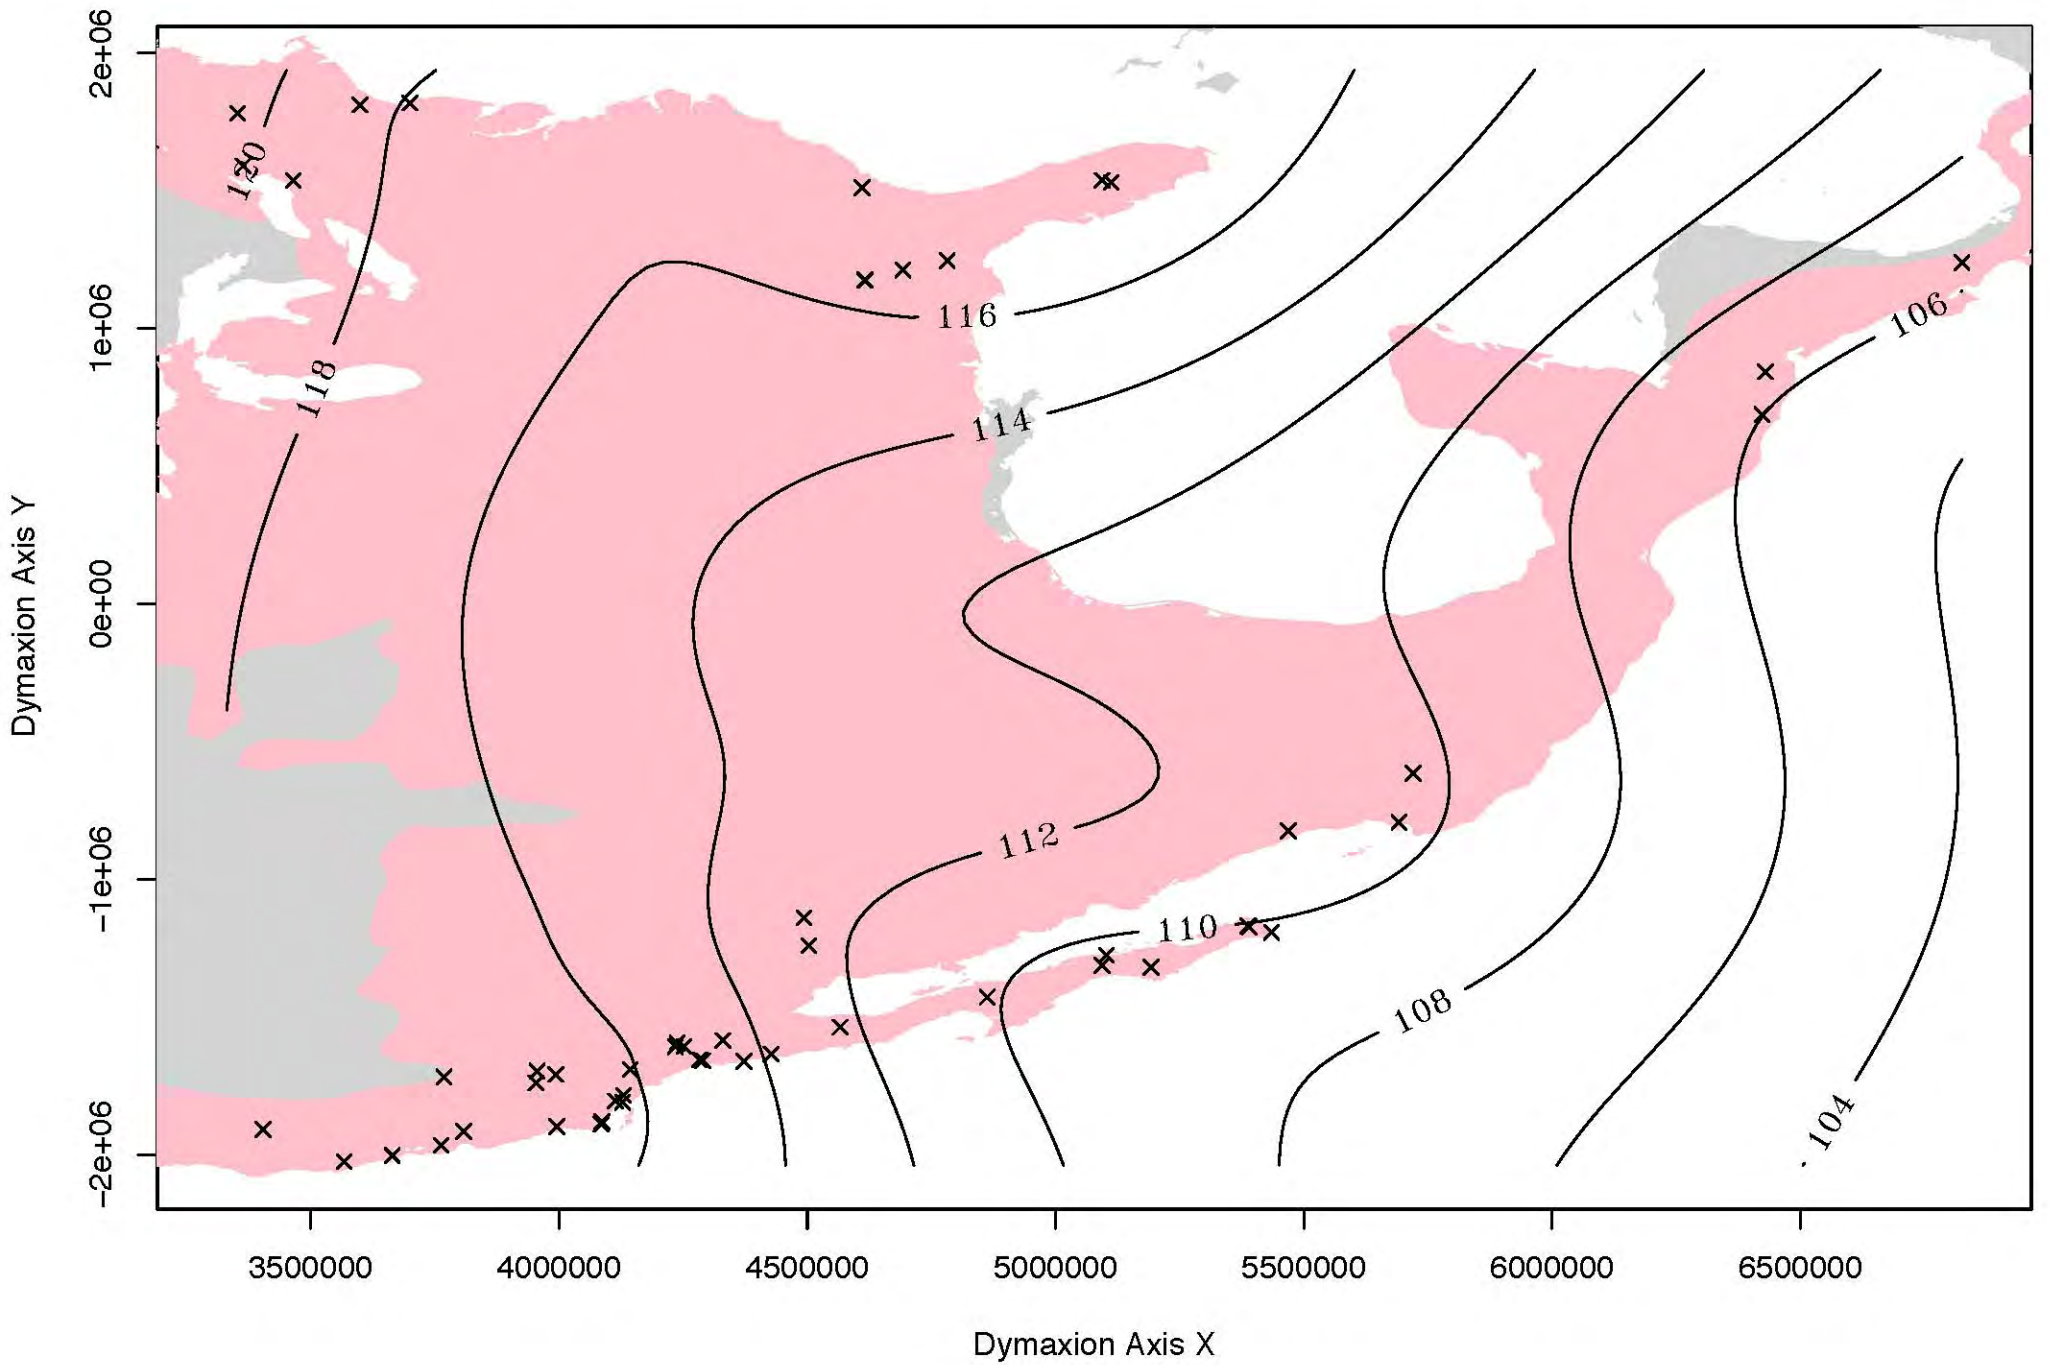

Marginal GAM Surface for CBL in male *Ursus arctos*

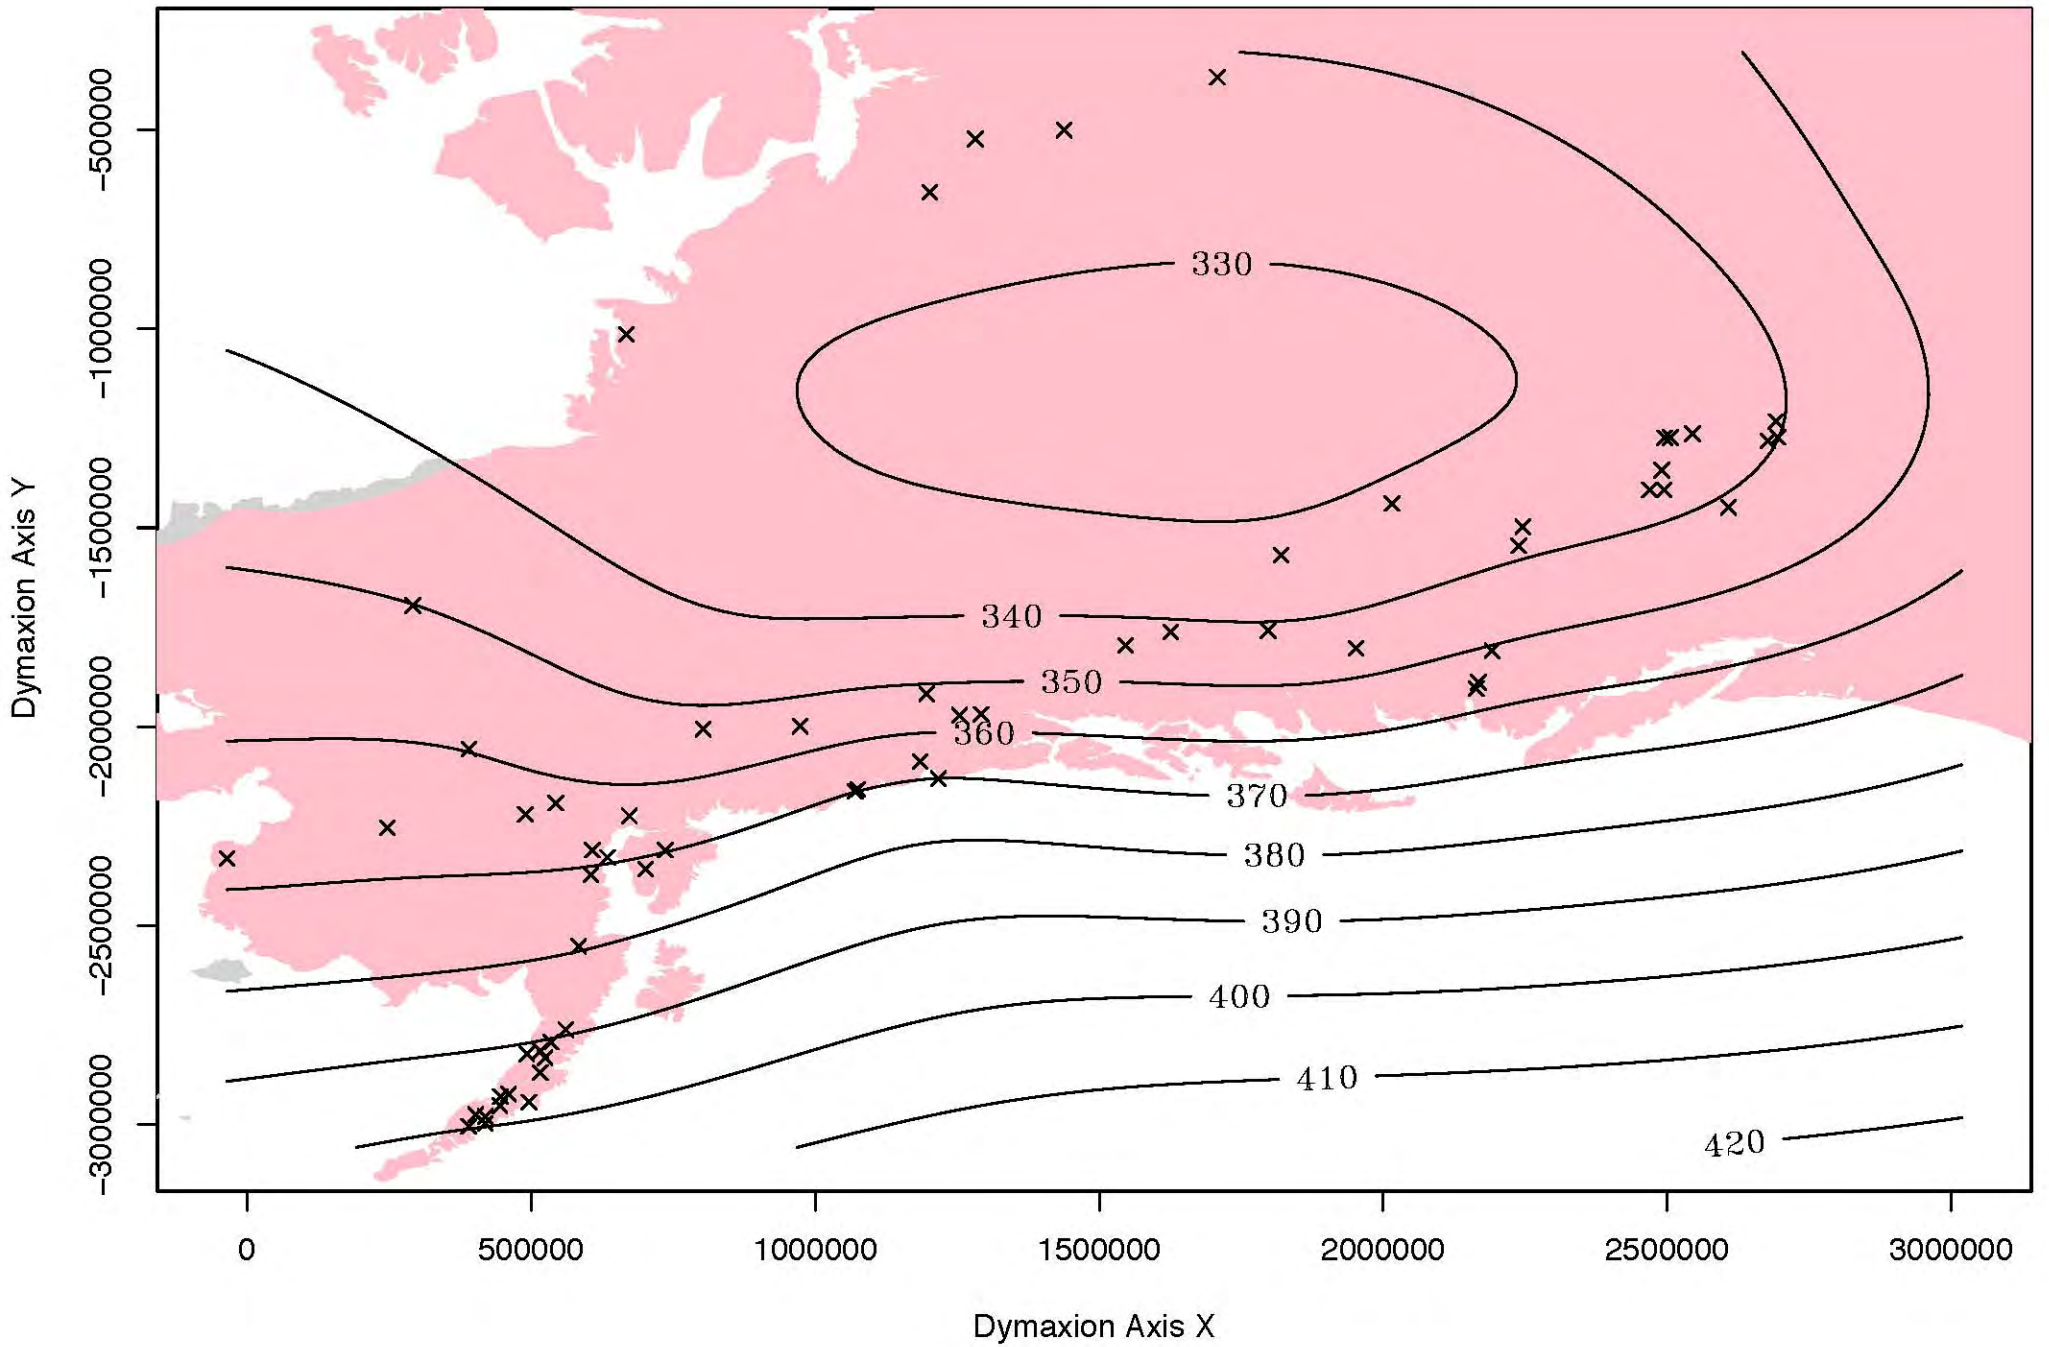



# Marginal GAM Surface for CBL in female *Ursus arctos*

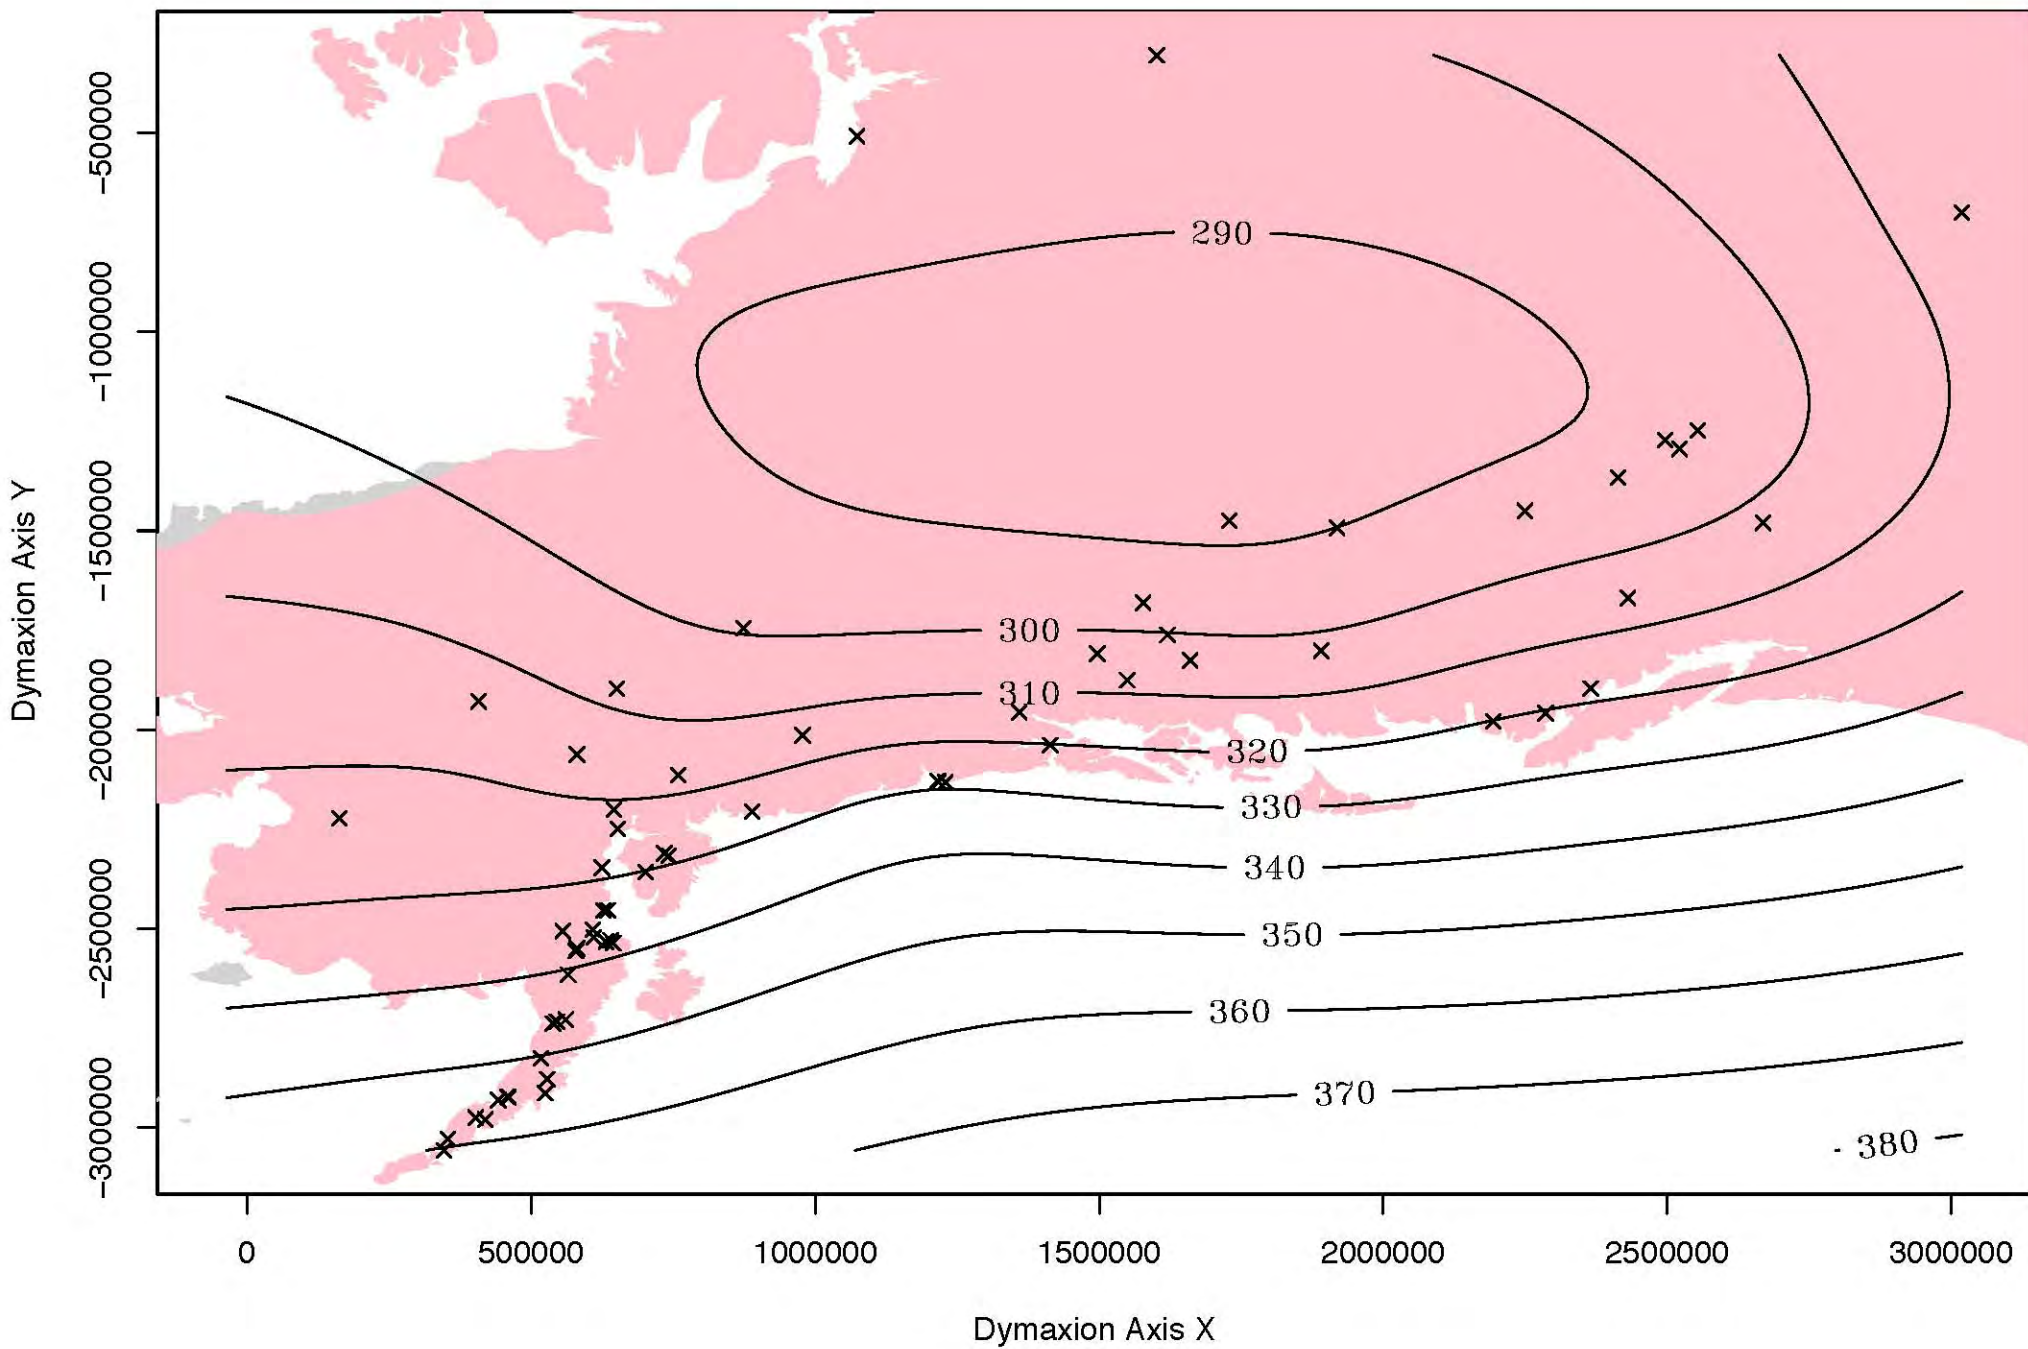



Marginal GAM Surface for CBL in male *Viverricula indica*

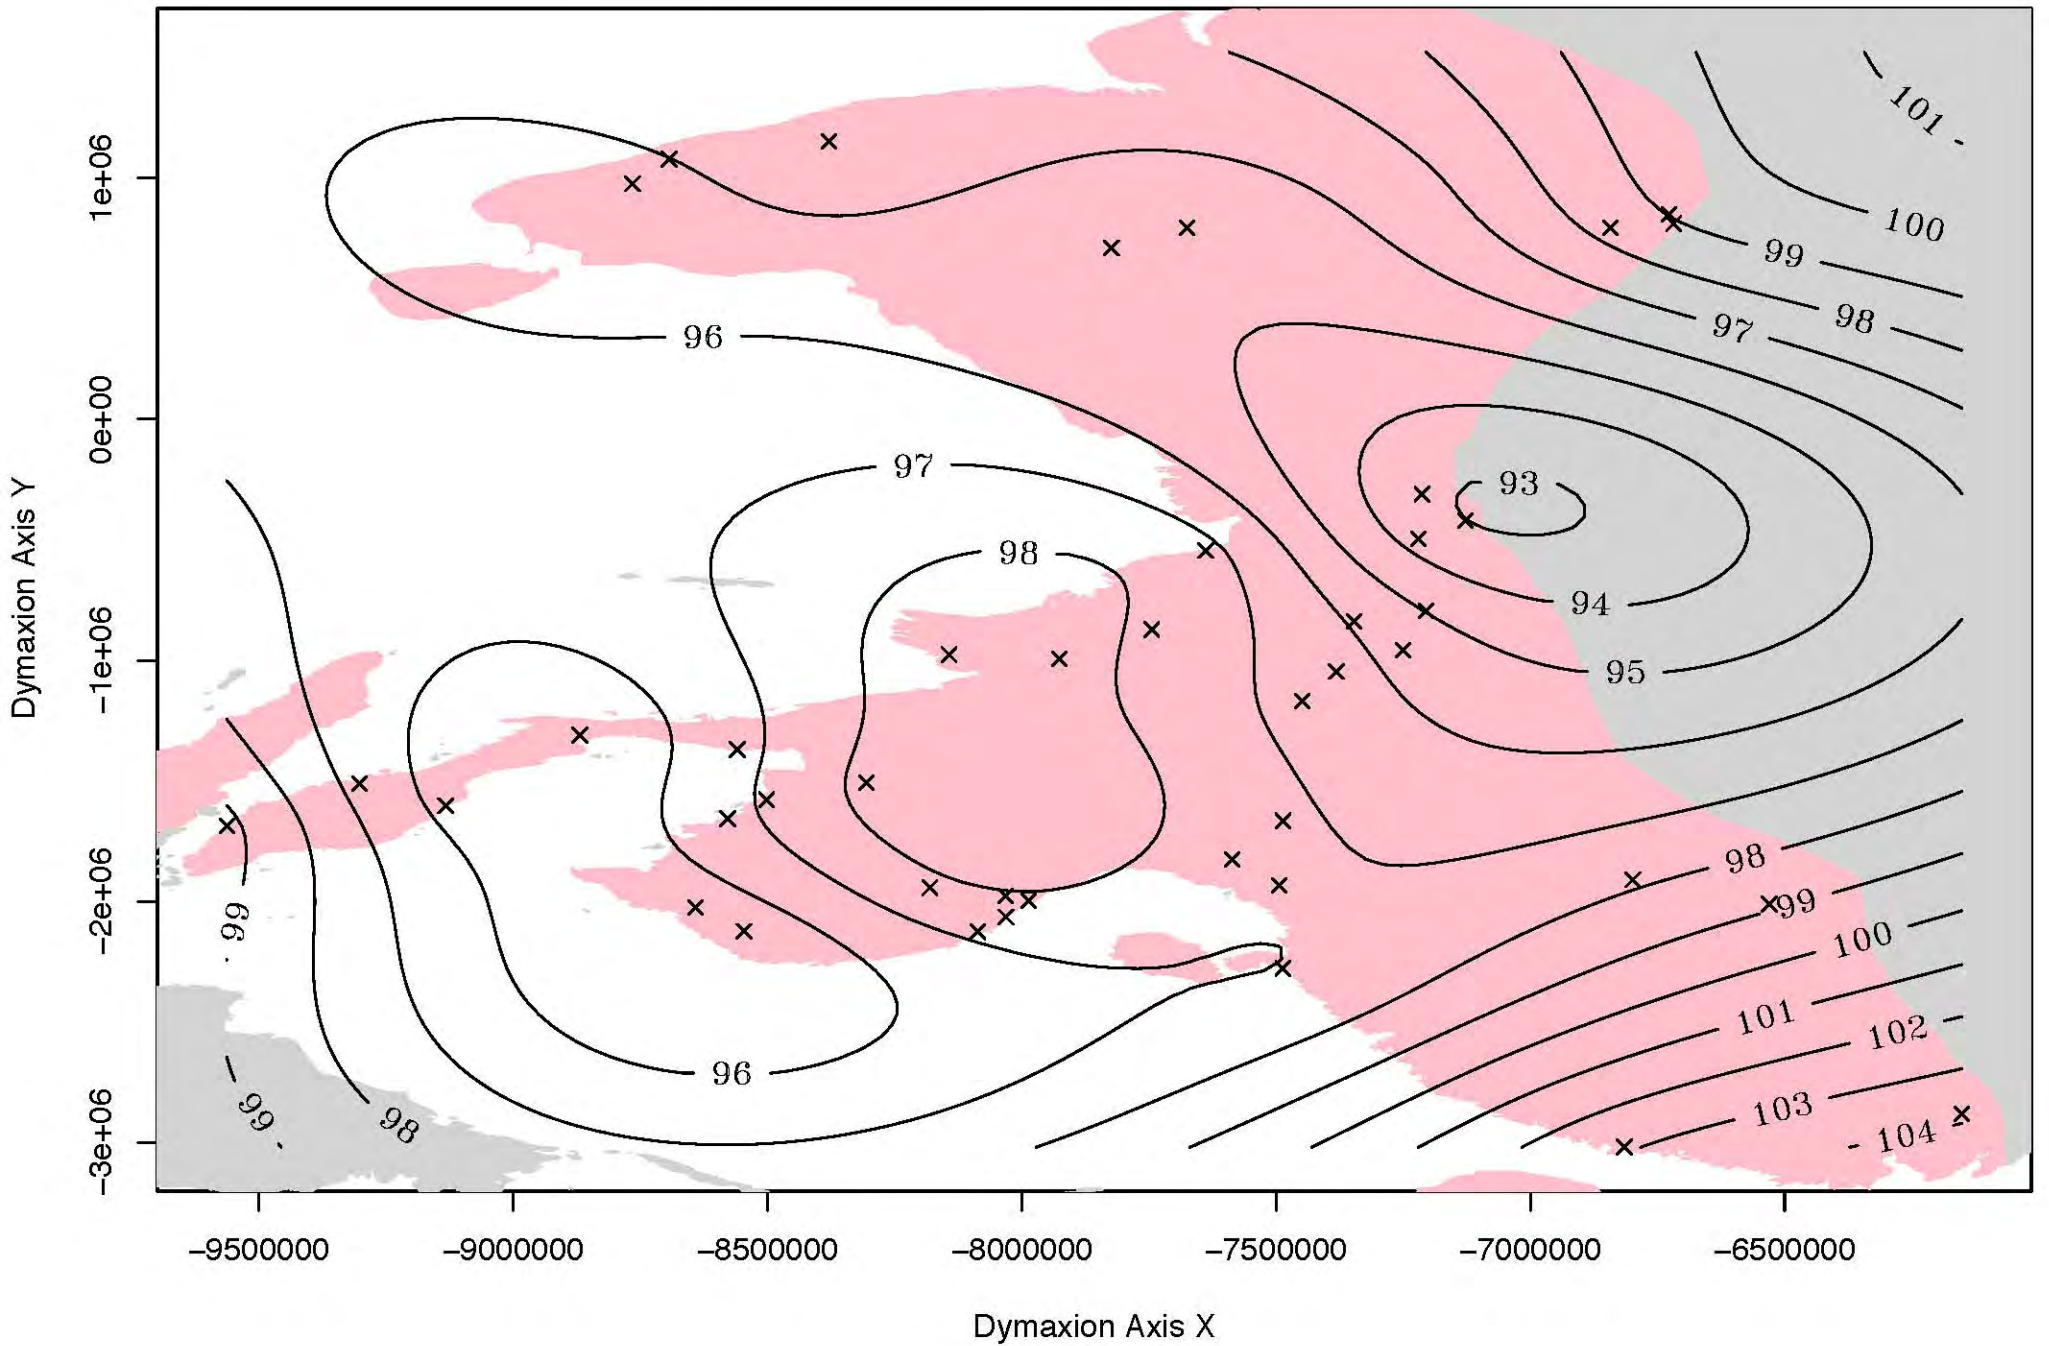

Marginal GAM Surface for CBL in female *Viverricula indica*

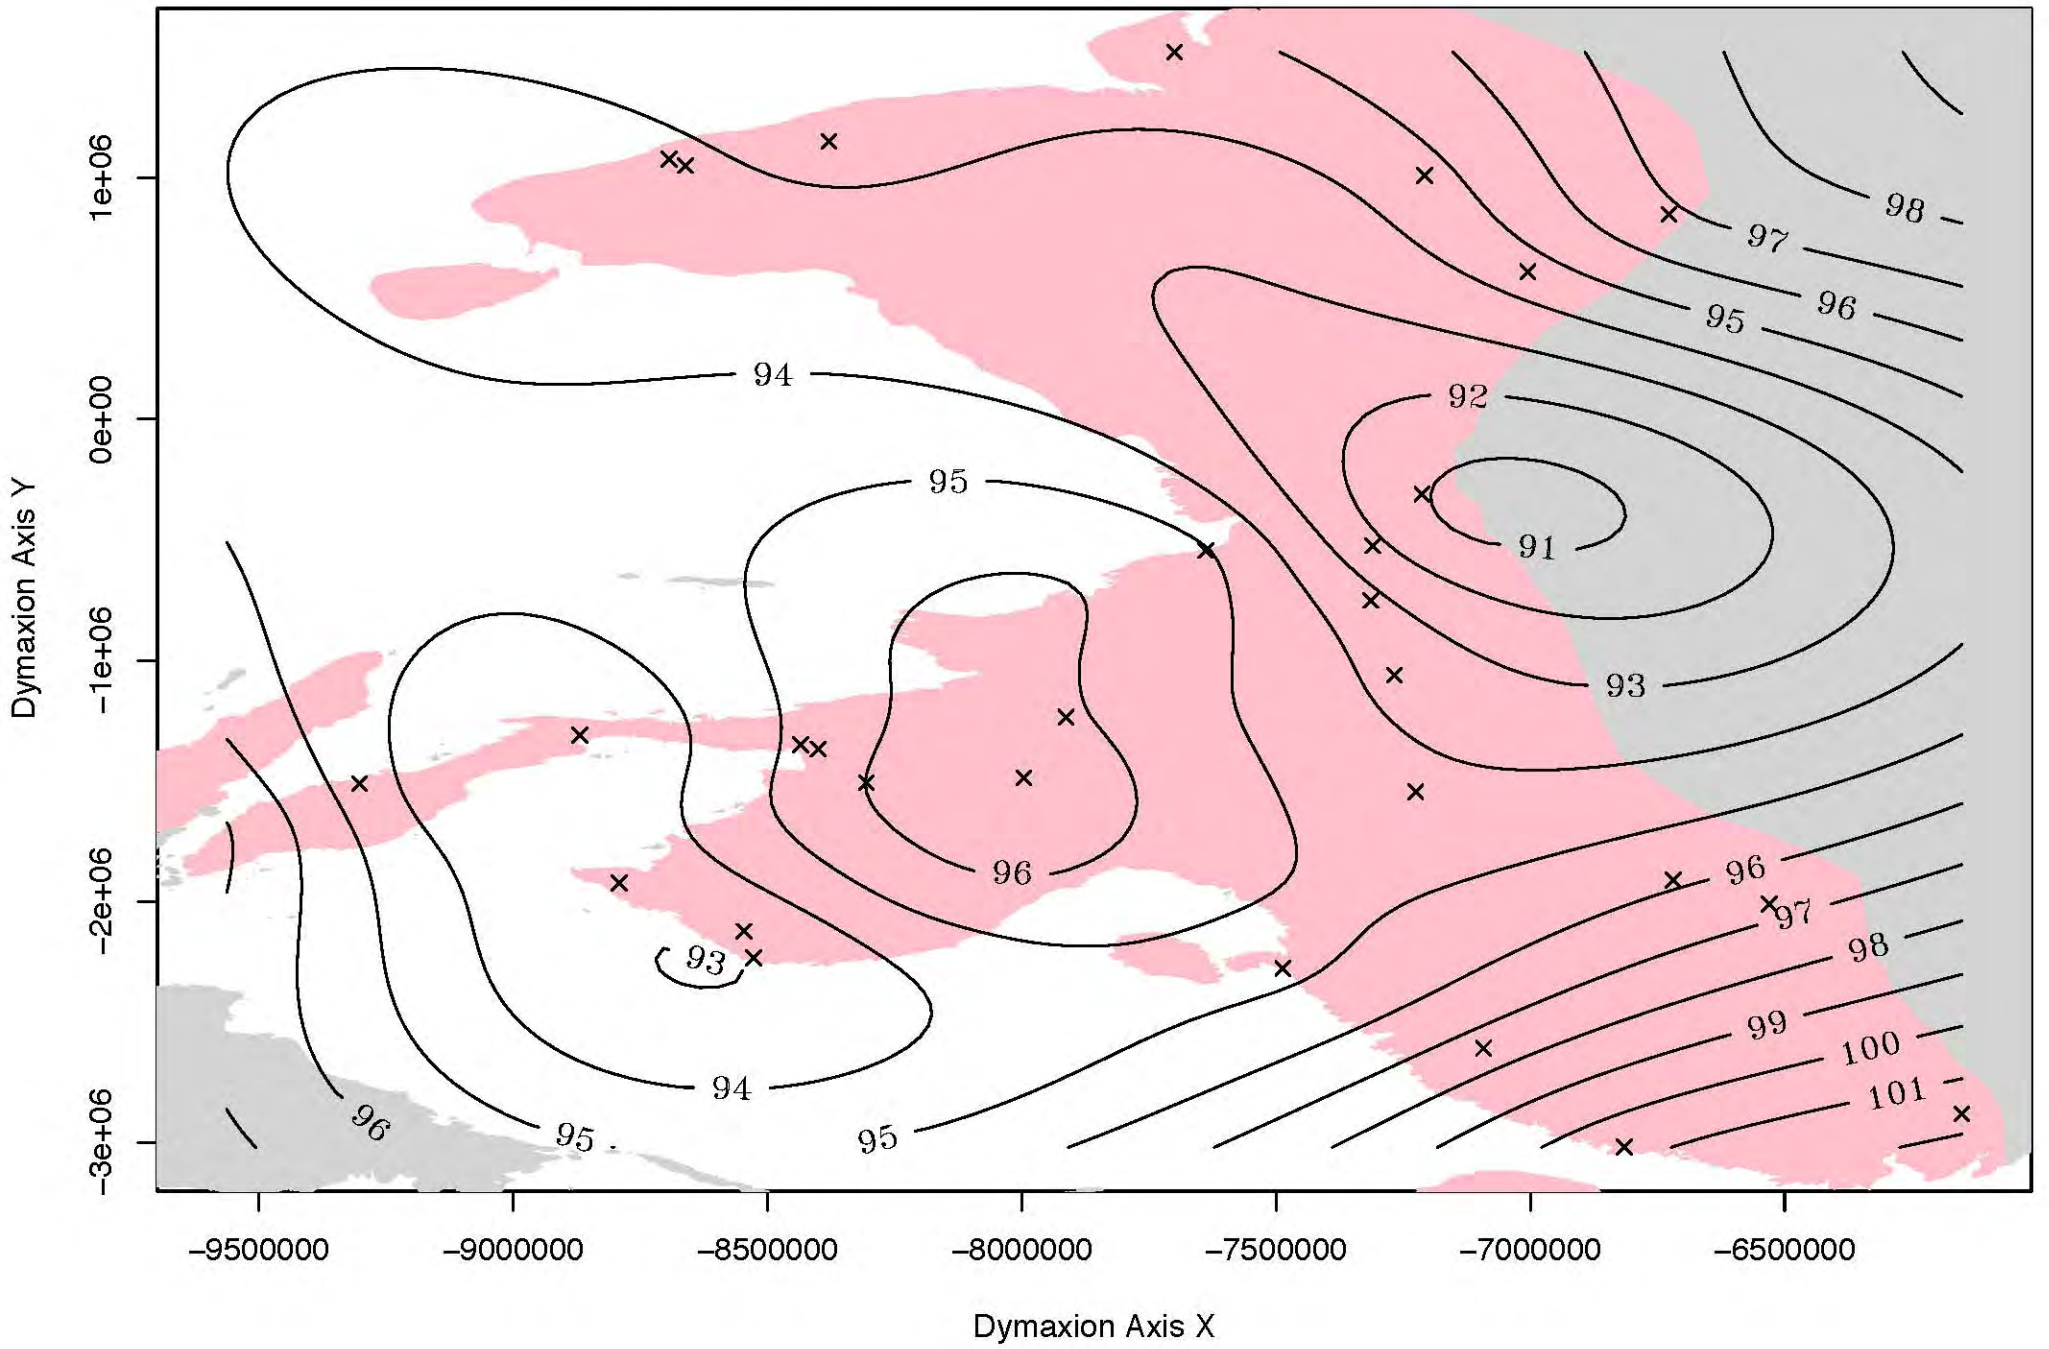



Marginal GAM Surface for CBL in male *Vulpes vulpes* Nearctic

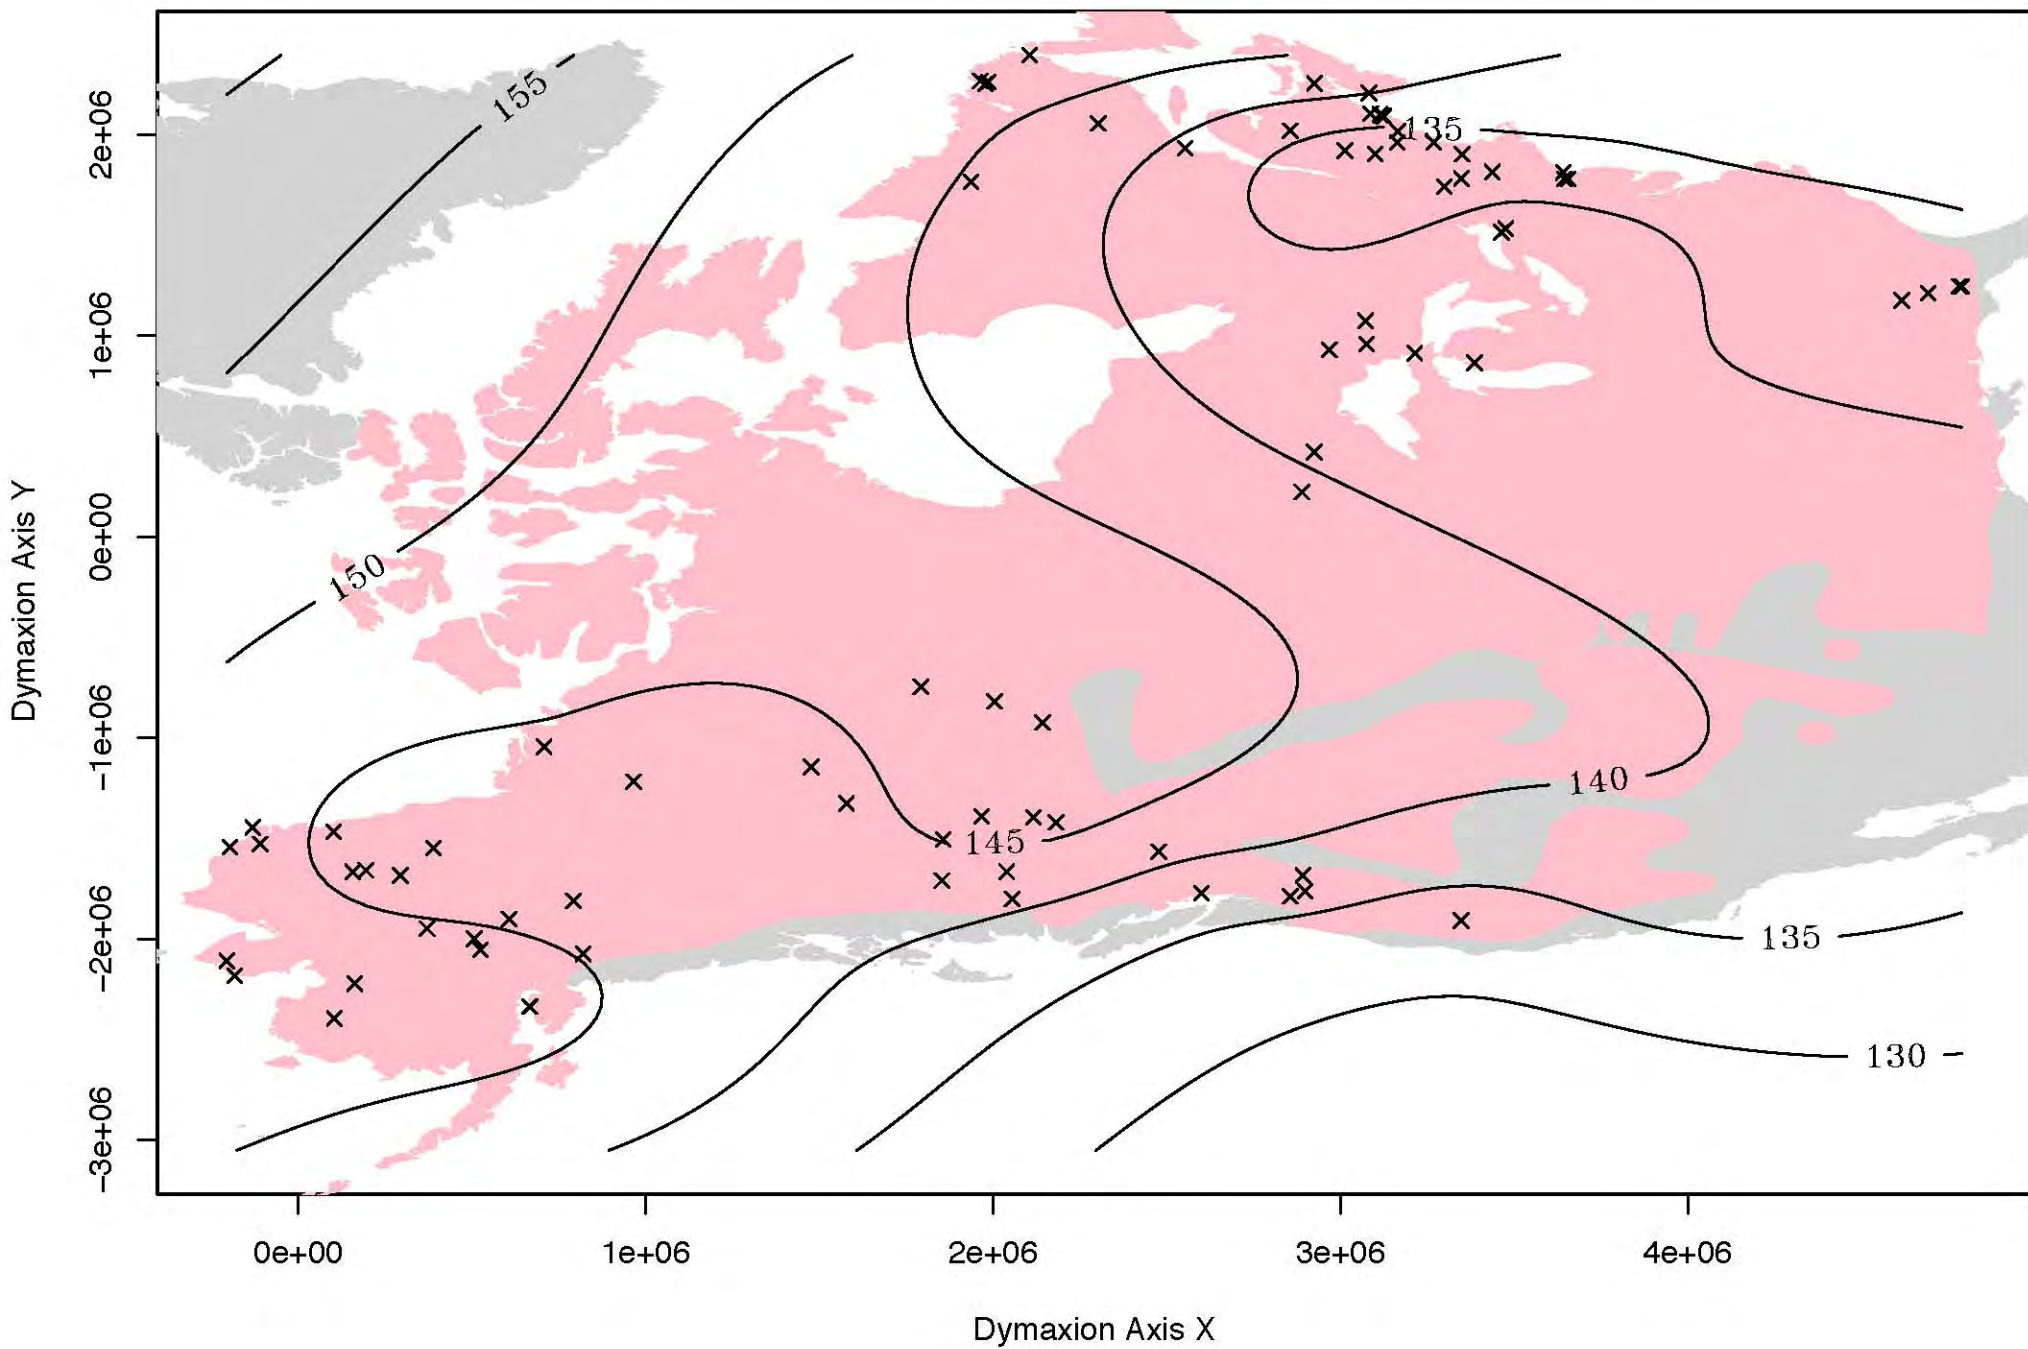



Marginal GAM Surface for CBL in female *Vulpes vulpes* Nearctic

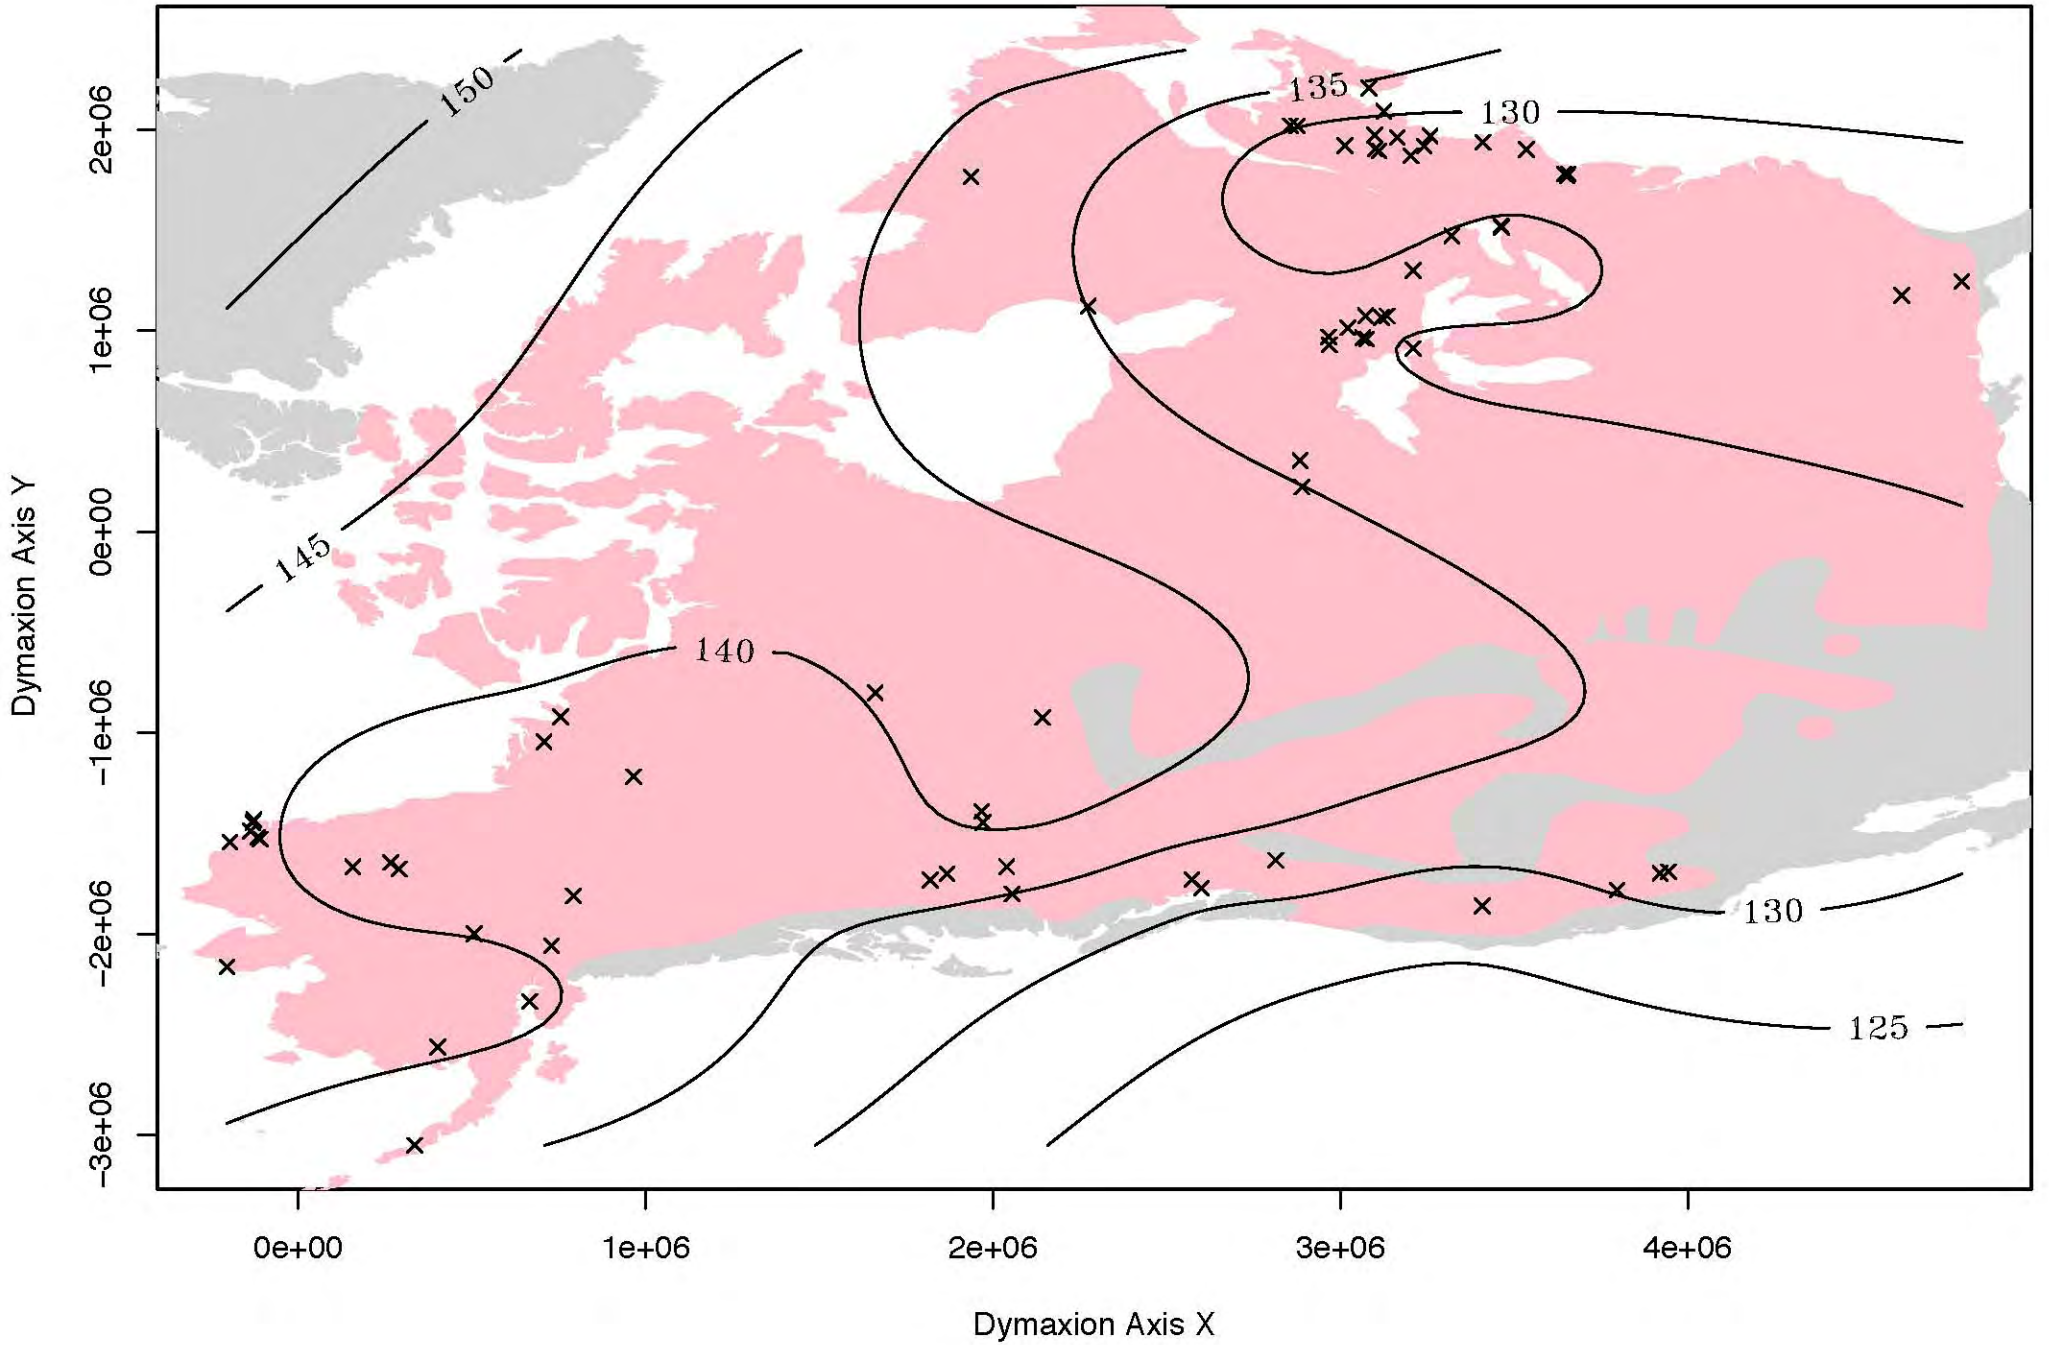

Marginal GAM Surface for CBL in male *Vulpes vulpes* Palearctic

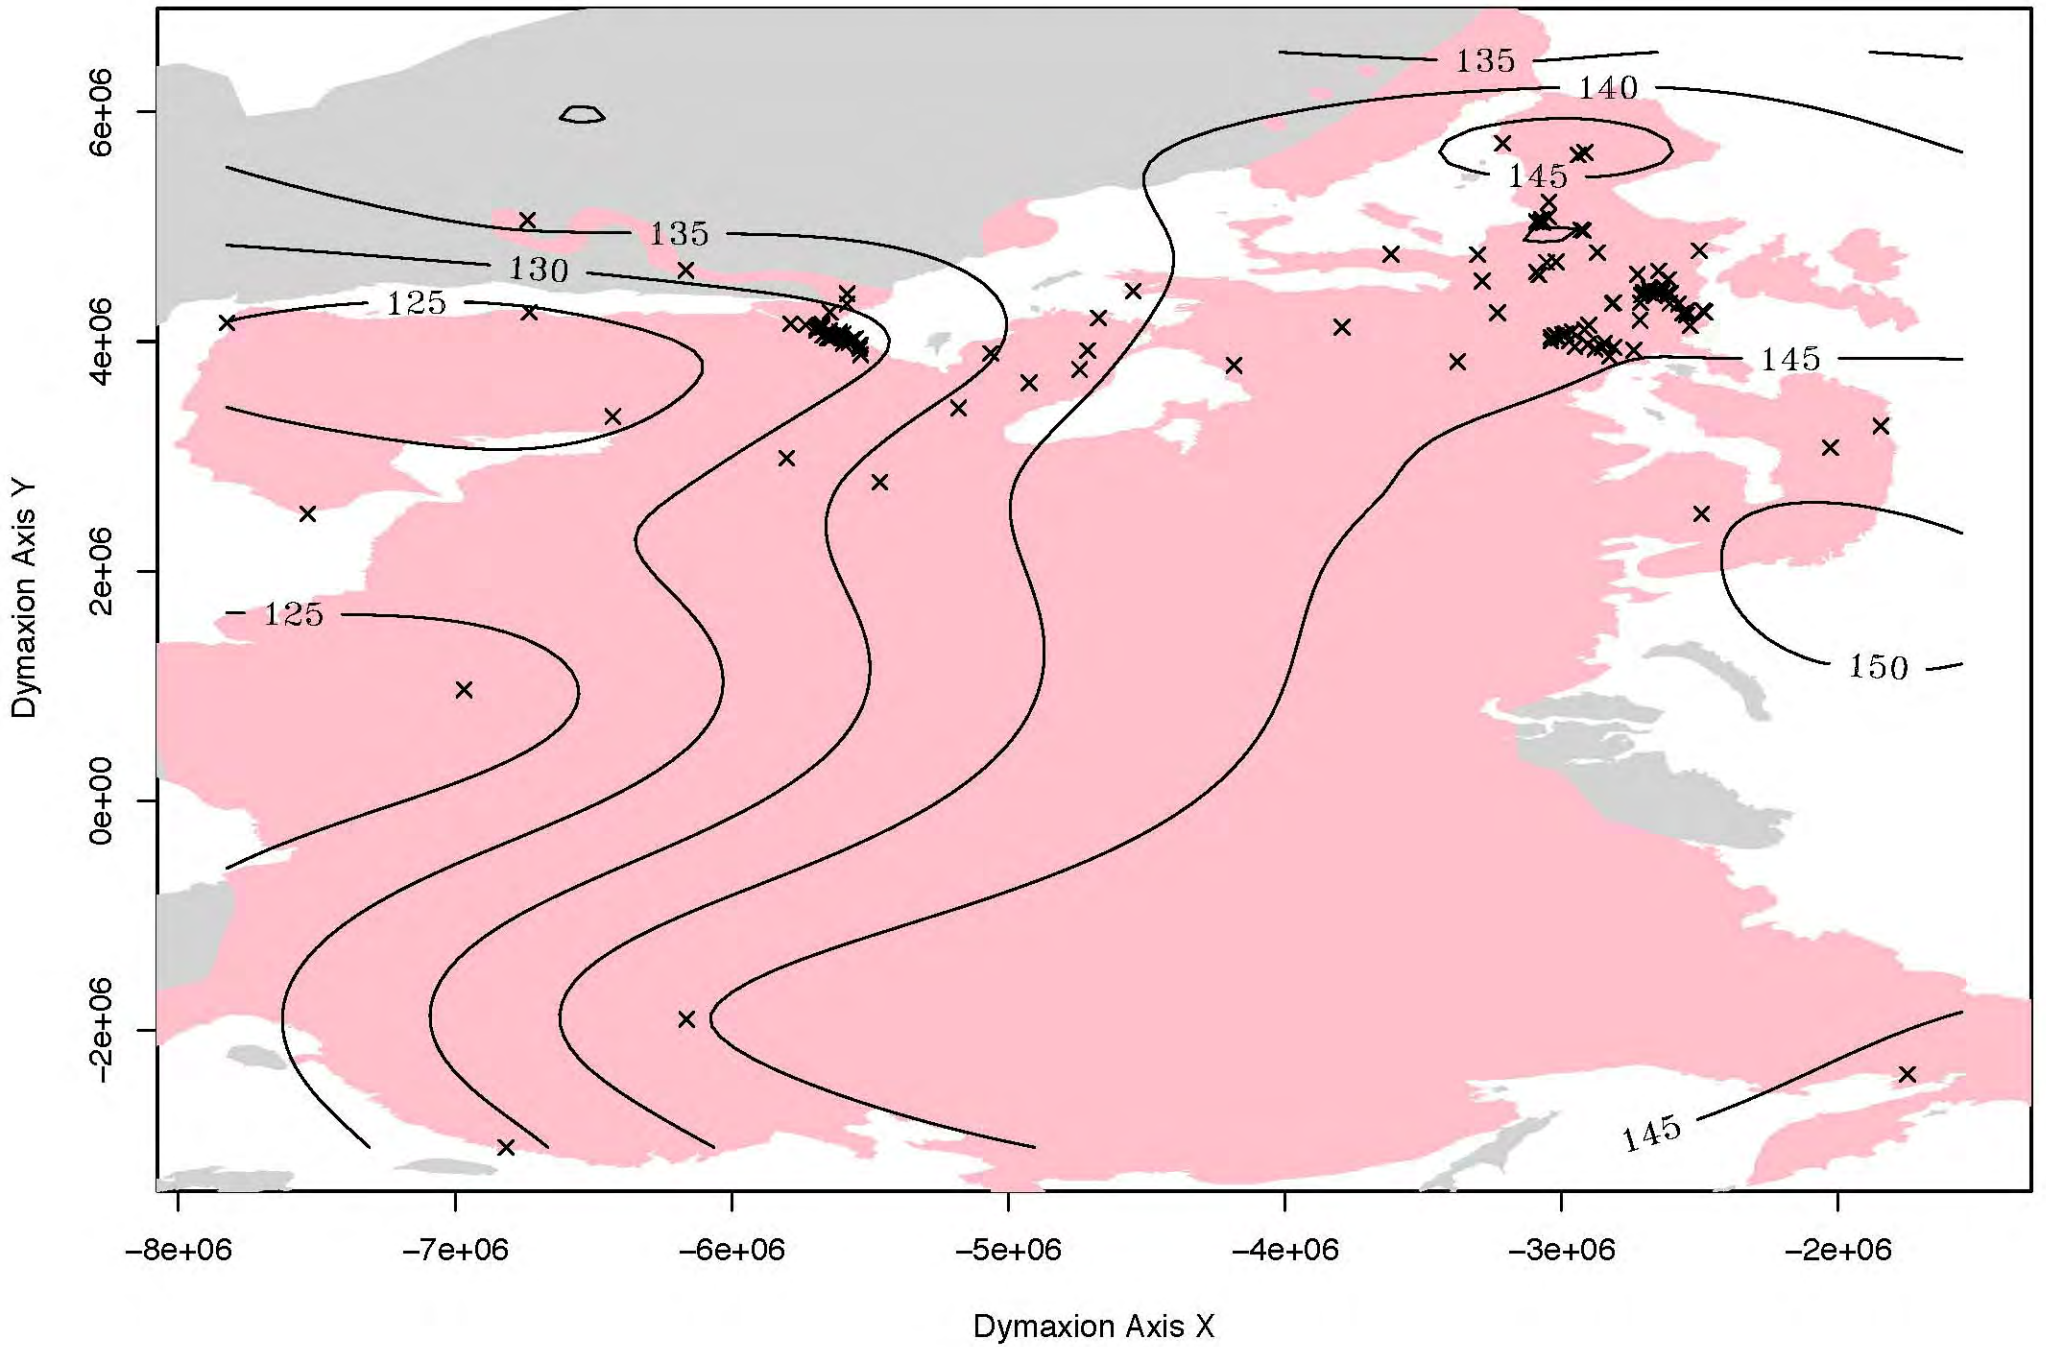



Marginal GAM Surface for CBL in female *Vulpes vulpes* Palearctic

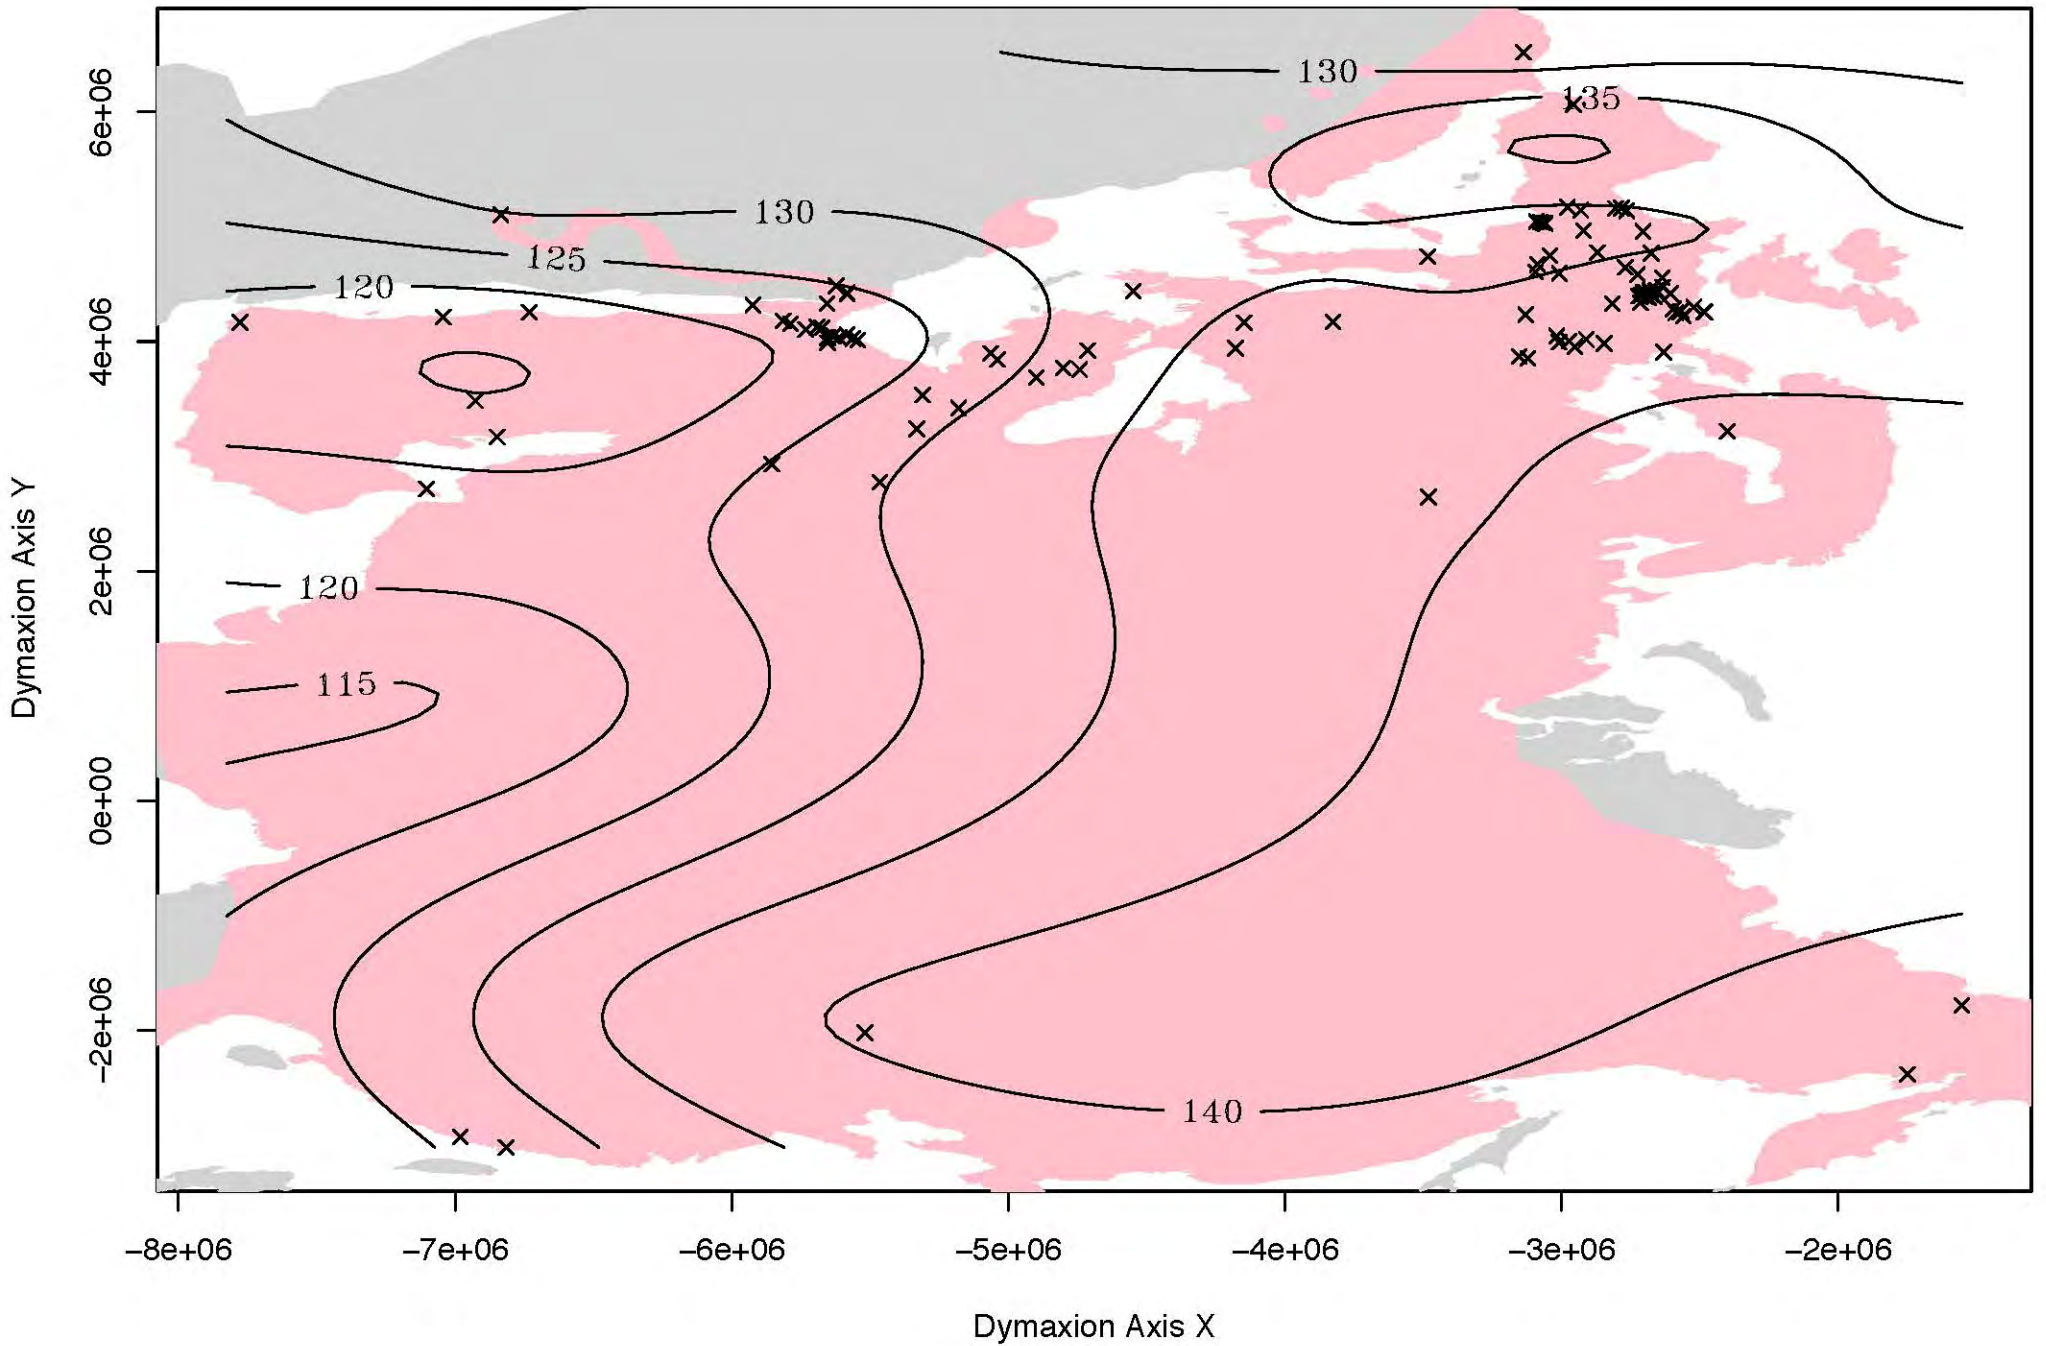



## Appendix 4A

CBL (=condylo-basal length, in mm) as a function of sex (male CBL minus female CBL), latitude, longitude and (log) distance to range edge. Distance to range edge treated as a continuous predictor. For sample sizes see Table 1.

| species                    | factor                 | Estimate | Std. Error | t      | p       |
|----------------------------|------------------------|----------|------------|--------|---------|
| <i>Alopex lagopus</i>      | distance to range edge | 0.087    | 0.690      | 0.126  | 0.900   |
| <i>Alopex lagopus</i>      | Intercept              | 118.860  | 9.543      | 12.455 | <0.0001 |
| <i>Alopex lagopus</i>      | Latitude               | 0.031    | 0.193      | 0.162  | 0.872   |
| <i>Alopex lagopus</i>      | Longitude              | 0.017    | 0.028      | 0.610  | 0.543   |
| <i>Alopex lagopus</i>      | sex                    | 4.378    | 0.607      | 7.211  | <0.0001 |
| <i>Canis aureus</i>        | distance to range edge | -1.255   | 0.871      | -1.441 | 0.153   |
| <i>Canis aureus</i>        | Intercept              | 152.670  | 3.273      | 46.650 | <0.0001 |
| <i>Canis aureus</i>        | Latitude               | 0.197    | 0.072      | 2.752  | 0.007   |
| <i>Canis aureus</i>        | Longitude              | -0.148   | 0.030      | -4.924 | <0.0001 |
| <i>Canis aureus</i>        | sex                    | 5.058    | 1.400      | 3.612  | 0.0005  |
| <i>Canis latrans</i>       | distance to range edge | -0.251   | 0.759      | -0.331 | 0.741   |
| <i>Canis latrans</i>       | Intercept              | 168.128  | 2.841      | 59.171 | <0.0001 |
| <i>Canis latrans</i>       | Latitude               | 0.440    | 0.049      | 8.903  | <0.0001 |
| <i>Canis latrans</i>       | Longitude              | 0.097    | 0.026      | 3.759  | 0.0002  |
| <i>Canis latrans</i>       | sex                    | 6.586    | 1.116      | 5.904  | <0.0001 |
| <i>Canis lupus</i>         | distance to range edge | 3.879    | 1.008      | 3.849  | 0.0002  |
| <i>Canis lupus</i>         | Intercept              | 199.302  | 6.675      | 29.860 | <0.0001 |
| <i>Canis lupus</i>         | Latitude               | 0.185    | 0.155      | 1.195  | 0.234   |
| <i>Canis lupus</i>         | Longitude              | -0.163   | 0.056      | -2.898 | 0.004   |
| <i>Canis lupus</i>         | sex                    | 7.774    | 1.341      | 5.797  | <0.0001 |
| <i>Gulo gulo</i>           | distance to range edge | -0.201   | 0.501      | -0.401 | 0.689   |
| <i>Gulo gulo</i>           | Intercept              | 119.515  | 4.896      | 24.413 | <0.0001 |
| <i>Gulo gulo</i>           | Latitude               | 0.157    | 0.087      | 1.794  | 0.075   |
| <i>Gulo gulo</i>           | Longitude              | -0.045   | 0.029      | -1.555 | 0.123   |
| <i>Gulo gulo</i>           | sex                    | 10.233   | 0.961      | 10.651 | <0.0001 |
| <i>Herpestes edwardsii</i> | distance to range edge | 0.751    | 0.545      | 1.377  | 0.172   |
| <i>Herpestes edwardsii</i> | Intercept              | 69.673   | 3.078      | 22.634 | <0.0001 |
| <i>Herpestes edwardsii</i> | Latitude               | -0.063   | 0.045      | -1.413 | 0.161   |
| <i>Herpestes edwardsii</i> | Longitude              | 0.060    | 0.038      | 1.584  | 0.116   |
| <i>Herpestes edwardsii</i> | sex                    | 4.535    | 0.561      | 8.081  | <0.0001 |
| <i>Lontra canadensis</i>   | distance to range edge | -1.868   | 0.454      | -4.112 | 0.0001  |
| <i>Lontra canadensis</i>   | Intercept              | 108.656  | 2.516      | 43.190 | <0.0001 |
| <i>Lontra canadensis</i>   | Latitude               | -0.018   | 0.063      | -0.287 | 0.774   |
| <i>Lontra canadensis</i>   | Longitude              | -0.039   | 0.016      | -2.492 | 0.014   |

|                            |                        |         |       |        |                       |
|----------------------------|------------------------|---------|-------|--------|-----------------------|
| <i>Lontra canadensis</i>   | sex                    | 2.974   | 0.726 | 4.097  | 0.0001                |
| <i>Lutra lutra</i>         | distance to range edge | -1.128  | 0.689 | -1.637 | 0.105                 |
| <i>Lutra lutra</i>         | Intercept              | 110.660 | 3.278 | 33.761 | <0.0001               |
| <i>Lutra lutra</i>         | Latitude               | 0.025   | 0.063 | 0.396  | 0.693                 |
| <i>Lutra lutra</i>         | Longitude              | -0.061  | 0.023 | -2.613 | 0.010                 |
| <i>Lutra lutra</i>         | sex                    | 7.630   | 0.990 | 7.703  | <0.0001               |
| <i>Lynx canadensis</i>     | distance to range edge | -0.145  | 0.452 | -0.321 | 0.748                 |
| <i>Lynx canadensis</i>     | Intercept              | 103.386 | 2.361 | 43.797 | <0.0001               |
| <i>Lynx canadensis</i>     | Latitude               | 0.126   | 0.061 | 2.048  | 0.042                 |
| <i>Lynx canadensis</i>     | Longitude              | -0.032  | 0.015 | -2.114 | 0.036                 |
| <i>Lynx canadensis</i>     | sex                    | 5.195   | 0.477 | 10.890 | <0.0001               |
| <i>Martes americana</i>    | distance to range edge | -0.678  | 0.200 | -3.398 | 0.001                 |
| <i>Martes americana</i>    | Intercept              | 55.362  | 1.668 | 33.188 | <0.0001               |
| <i>Martes americana</i>    | Latitude               | 0.400   | 0.037 | 10.679 | <0.0001               |
| <i>Martes americana</i>    | Longitude              | 0.017   | 0.008 | 2.110  | 0.036                 |
| <i>Martes americana</i>    | sex                    | 5.892   | 0.375 | 15.727 | <0.0001               |
| <i>Martes foina</i>        | distance to range edge | -0.190  | 0.269 | -0.704 | 0.482                 |
| <i>Martes foina</i>        | Intercept              | 69.034  | 1.355 | 50.942 | <0.0001               |
| <i>Martes foina</i>        | Latitude               | 0.178   | 0.030 | 5.942  | <0.0001               |
| <i>Martes foina</i>        | Longitude              | 0.012   | 0.013 | 0.906  | 0.366                 |
| <i>Martes foina</i>        | sex                    | 3.900   | 0.277 | 14.080 | <0.0001               |
| <i>Martes martes</i>       | distance to range edge | 0.232   | 0.491 | 0.473  | 0.637                 |
| <i>Martes martes</i>       | Intercept              | 70.158  | 3.758 | 18.670 | <0.0001               |
| <i>Martes martes</i>       | Latitude               | 0.190   | 0.071 | 2.668  | 0.009                 |
| <i>Martes martes</i>       | Longitude              | -0.063  | 0.038 | -1.671 | 0.097                 |
| <i>Martes martes</i>       | sex                    | 5.288   | 0.539 | 9.812  | <0.0001               |
| <i>Meles meles</i>         | distance to range edge | 0.730   | 0.388 | 1.881  | 0.061                 |
| <i>Meles meles</i>         | Intercept              | 107.612 | 2.128 | 50.578 | <0.0001               |
| <i>Meles meles</i>         | Latitude               | 0.406   | 0.038 | 10.608 | <0.0001               |
| <i>Meles meles</i>         | Longitude              | -0.083  | 0.015 | -5.645 | <0.0001               |
| <i>Meles meles</i>         | sex                    | 3.101   | 0.532 | 5.831  | <0.0001               |
| <i>Mustela erminea</i> (N) | distance to range edge | 0.199   | 0.081 | 2.469  | 0.014                 |
| <i>Mustela erminea</i> (N) | Intercept              | 23.875  | 0.493 | 48.394 | <0.0001               |
| <i>Mustela erminea</i> (N) | Latitude               | 0.310   | 0.012 | 24.890 | <0.0001               |
| <i>Mustela erminea</i> (N) | Longitude              | 0.033   | 0.003 | 9.854  | <0.0001               |
| <i>Mustela erminea</i> (N) | sex                    | 5.285   | 0.151 | 34.992 | <0.0001               |
| <i>Mustela erminea</i> (P) | distance to range edge | 0.256   | 0.171 | 1.497  | 0.135                 |
| <i>Mustela erminea</i> (P) | Intercept              | 44.254  | 1.035 | 42.738 | <0.0001               |
| <i>Mustela erminea</i> (P) | Latitude               | -0.032  | 0.018 | -1.790 | 0.074                 |
| <i>Mustela erminea</i> (P) | Longitude              | -0.007  | 0.003 | -2.007 | 0.045                 |
| <i>Mustela erminea</i> (P) | sex                    | 3.811   | 0.238 | 15.980 | <0.0001               |
| <i>Mustela frenata</i>     | distance to range edge | -0.589  | 0.137 | -4.285 | <0.0001               |
| <i>Mustela frenata</i>     | Intercept              | 43.609  | 0.645 | 67.568 | 3.54443721801929e-311 |

|                                   |                        |         |        |         |         |
|-----------------------------------|------------------------|---------|--------|---------|---------|
| <i>Mustela frenata</i>            | Latitude               | -0.029  | 0.012  | -2.443  | 0.015   |
| <i>Mustela frenata</i>            | Longitude              | -0.013  | 0.005  | -2.749  | 0.006   |
| <i>Mustela frenata</i>            | sex                    | 5.294   | 0.206  | 25.728  | <0.0001 |
| <i>Mustela nivalis</i> (N)        | distance to range edge | -0.473  | 0.135  | -3.495  | 0.001   |
| <i>Mustela nivalis</i> (N)        | Intercept              | 30.156  | 0.791  | 38.124  | <0.0001 |
| <i>Mustela nivalis</i> (N)        | Latitude               | -0.045  | 0.029  | -1.559  | 0.121   |
| <i>Mustela nivalis</i> (N)        | Longitude              | -0.023  | 0.011  | -2.155  | 0.033   |
| <i>Mustela nivalis</i> (N)        | sex                    | 2.673   | 0.238  | 11.221  | <0.0001 |
| <i>Mustela nivalis</i> (P)        | distance to range edge | -1.492  | 0.120  | -12.476 | <0.0001 |
| <i>Mustela nivalis</i> (P)        | Intercept              | 52.654  | 0.615  | 85.660  | <0.0001 |
| <i>Mustela nivalis</i> (P)        | Latitude               | -0.336  | 0.011  | -29.804 | <0.0001 |
| <i>Mustela nivalis</i> (P)        | Longitude              | 0.003   | 0.005  | 0.703   | 0.482   |
| <i>Mustela nivalis</i> (P)        | sex                    | 4.507   | 0.181  | 24.908  | <0.0001 |
| <i>Mustela putorius</i>           | distance to range edge | 1.380   | 0.263  | 5.241   | <0.0001 |
| <i>Mustela putorius</i>           | Intercept              | 53.468  | 2.626  | 20.359  | <0.0001 |
| <i>Mustela putorius</i>           | Latitude               | 0.081   | 0.050  | 1.610   | 0.108   |
| <i>Mustela putorius</i>           | Longitude              | -0.081  | 0.034  | -2.359  | 0.019   |
| <i>Mustela putorius</i>           | sex                    | 7.235   | 0.322  | 22.450  | <0.0001 |
| <i>Mustela vison</i>              | distance to range edge | 0.211   | 0.197  | 1.072   | 0.285   |
| <i>Mustela vison</i>              | Intercept              | 51.641  | 1.534  | 33.664  | <0.0001 |
| <i>Mustela vison</i>              | Latitude               | 0.016   | 0.033  | 0.491   | 0.624   |
| <i>Mustela vison</i>              | Longitude              | -0.072  | 0.007  | -10.764 | <0.0001 |
| <i>Mustela vison</i>              | sex                    | 5.423   | 0.372  | 14.558  | <0.0001 |
| <i>Paradoxurus hermaphroditus</i> | distance to range edge | 3.181   | 0.915  | 3.477   | 0.001   |
| <i>Paradoxurus hermaphroditus</i> | Intercept              | 103.081 | 9.514  | 10.835  | <0.0001 |
| <i>Paradoxurus hermaphroditus</i> | Latitude               | 0.063   | 0.091  | 0.689   | 0.493   |
| <i>Paradoxurus hermaphroditus</i> | Longitude              | -0.067  | 0.085  | -0.786  | 0.434   |
| <i>Paradoxurus hermaphroditus</i> | sex                    | 4.428   | 1.250  | 3.543   | 0.001   |
| <i>Procyon lotor</i>              | distance to range edge | 0.902   | 0.582  | 1.551   | 0.123   |
| <i>Procyon lotor</i>              | Intercept              | 98.462  | 2.508  | 39.263  | <0.0001 |
| <i>Procyon lotor</i>              | Latitude               | -0.120  | 0.043  | -2.798  | 0.006   |
| <i>Procyon lotor</i>              | Longitude              | -0.131  | 0.028  | -4.750  | <0.0001 |
| <i>Procyon lotor</i>              | sex                    | 4.119   | 0.839  | 4.910   | <0.0001 |
| <i>Spilogale gracilis</i>         | distance to range edge | -1.839  | 0.566  | -3.249  | 0.002   |
| <i>Spilogale gracilis</i>         | Intercept              | 59.494  | 17.668 | 3.367   | 0.001   |
| <i>Spilogale gracilis</i>         | Latitude               | -0.123  | 0.113  | -1.083  | 0.282   |
| <i>Spilogale gracilis</i>         | Longitude              | 0.011   | 0.179  | 0.061   | 0.951   |
| <i>Spilogale gracilis</i>         | sex                    | 4.830   | 0.726  | 6.650   | <0.0001 |
| <i>Urocyon cinereoargenteus</i>   | distance to range edge | -0.063  | 0.537  | -0.118  | 0.906   |
| <i>Urocyon cinereoargenteus</i>   | Intercept              | 106.911 | 2.430  | 44.000  | <0.0001 |
| <i>Urocyon cinereoargenteus</i>   | Latitude               | 0.443   | 0.045  | 9.811   | <0.0001 |
| <i>Urocyon cinereoargenteus</i>   | Longitude              | 0.057   | 0.017  | 3.264   | 0.001   |
| <i>Urocyon cinereoargenteus</i>   | sex                    | 3.051   | 0.593  | 5.141   | <0.0001 |
| <i>Ursus arctos</i>               | distance to range edge | -8.817  | 1.815  | -4.857  | <0.0001 |



|                           |                        |         |        |        |         |
|---------------------------|------------------------|---------|--------|--------|---------|
| <i>Ursus arctos</i>       | Intercept              | 261.545 | 22.946 | 11.398 | <0.0001 |
| <i>Ursus arctos</i>       | Latitude               | -1.112  | 0.336  | -3.307 | 0.001   |
| <i>Ursus arctos</i>       | Longitude              | -0.977  | 0.098  | -9.959 | <0.0001 |
| <i>Ursus arctos</i>       | sex                    | 42.688  | 2.881  | 14.815 | <0.0001 |
| <i>Viverricula indica</i> | distance to range edge | -1.201  | 0.539  | -2.230 | 0.028   |
| <i>Viverricula indica</i> | Intercept              | 83.858  | 3.075  | 27.268 | <0.0001 |
| <i>Viverricula indica</i> | Latitude               | 0.169   | 0.050  | 3.398  | 0.001   |
| <i>Viverricula indica</i> | Longitude              | 0.105   | 0.026  | 3.952  | 0.0001  |
| <i>Viverricula indica</i> | sex                    | 2.009   | 0.716  | 2.806  | 0.006   |
| <i>Vulpes vulpes</i> (N)  | distance to range edge | -0.332  | 0.470  | -0.706 | 0.481   |
| <i>Vulpes vulpes</i> (N)  | Intercept              | 115.039 | 1.916  | 60.038 | <0.0001 |
| <i>Vulpes vulpes</i> (N)  | Latitude               | 0.284   | 0.049  | 5.813  | <0.0001 |
| <i>Vulpes vulpes</i> (N)  | Longitude              | -0.042  | 0.017  | -2.459 | 0.015   |
| <i>Vulpes vulpes</i> (N)  | sex                    | 6.904   | 0.720  | 9.595  | <0.0001 |
| <i>Vulpes vulpes</i> (P)  | distance to range edge | 0.747   | 0.613  | 1.218  | 0.224   |
| <i>Vulpes vulpes</i> (P)  | Intercept              | 106.366 | 2.087  | 50.973 | <0.0001 |
| <i>Vulpes vulpes</i> (P)  | Latitude               | 0.581   | 0.043  | 13.640 | <0.0001 |
| <i>Vulpes vulpes</i> (P)  | Longitude              | -0.021  | 0.016  | -1.334 | 0.183   |
| <i>Vulpes vulpes</i> (P)  | sex                    | 6.628   | 0.736  | 9.006  | <0.0001 |

## Appendix 4B

CBL (=condylo-basal length, in mm) as a function of sex (male CBL minus female CBL), latitude, longitude, (log) distance to range edge, and its squared term. Distance to range edge treated as a continuous predictor. For sample sizes see Table 1.

| <b>species</b>             | <b>factor</b>    | <b>Estimate</b> | <b>Std. Error</b> | <b>t</b> | <b>p</b> |
|----------------------------|------------------|-----------------|-------------------|----------|----------|
| <i>Alopex lagopus</i>      | Distance         | 2.412           | 1.578             | 1.529    | 0.128    |
| <i>Alopex lagopus</i>      | Distance Squared | -1.365          | 0.834             | -1.637   | 0.104    |
| <i>Alopex lagopus</i>      | Intercept        | 116.058         | 9.642             | 12.036   | <0.0001  |
| <i>Alopex lagopus</i>      | Latitude         | 0.072           | 0.193             | 0.374    | 0.709    |
| <i>Alopex lagopus</i>      | Longitude        | 0.021           | 0.028             | 0.740    | 0.461    |
| <i>Alopex lagopus</i>      | Sex              | 4.425           | 0.604             | 7.321    | <0.0001  |
| <i>Canis aureus</i>        | Distance         | 0.318           | 3.190             | 0.100    | 0.921    |
| <i>Canis aureus</i>        | Distance Squared | -0.577          | 1.125             | -0.513   | 0.609    |
| <i>Canis aureus</i>        | Intercept        | 152.476         | 3.306             | 46.119   | <0.0001  |
| <i>Canis aureus</i>        | Latitude         | 0.180           | 0.079             | 2.288    | 0.024    |
| <i>Canis aureus</i>        | Longitude        | -0.149          | 0.030             | -4.929   | <0.0001  |
| <i>Canis aureus</i>        | Sex              | 5.155           | 1.418             | 3.635    | 0.0004   |
| <i>Canis latrans</i>       | Distance         | -4.345          | 2.568             | -1.692   | 0.092    |
| <i>Canis latrans</i>       | Distance Squared | 1.502           | 0.900             | 1.668    | 0.097    |
| <i>Canis latrans</i>       | Intercept        | 170.307         | 3.114             | 54.693   | <0.0001  |
| <i>Canis latrans</i>       | Latitude         | 0.440           | 0.049             | 8.959    | <0.0001  |
| <i>Canis latrans</i>       | Longitude        | 0.100           | 0.026             | 3.888    | 0.0001   |
| <i>Canis latrans</i>       | Sex              | 6.552           | 1.110             | 5.903    | <0.0001  |
| <i>Canis lupus</i>         | Distance         | -0.137          | 3.943             | -0.035   | 0.972    |
| <i>Canis lupus</i>         | Distance Squared | 1.462           | 1.388             | 1.053    | 0.294    |
| <i>Canis lupus</i>         | Intercept        | 201.525         | 6.998             | 28.797   | <0.0001  |
| <i>Canis lupus</i>         | Latitude         | 0.114           | 0.169             | 0.676    | 0.500    |
| <i>Canis lupus</i>         | Longitude        | -0.186          | 0.060             | -3.083   | 0.002    |
| <i>Canis lupus</i>         | Sex              | 7.895           | 1.346             | 5.868    | <0.0001  |
| <i>Gulo gulo</i>           | Distance         | 2.632           | 2.302             | 1.143    | 0.255    |
| <i>Gulo gulo</i>           | Distance Squared | -1.113          | 0.883             | -1.261   | 0.210    |
| <i>Gulo gulo</i>           | Intercept        | 120.013         | 4.900             | 24.493   | <0.0001  |
| <i>Gulo gulo</i>           | Latitude         | 0.162           | 0.087             | 1.853    | 0.066    |
| <i>Gulo gulo</i>           | Longitude        | -0.035          | 0.029             | -1.201   | 0.232    |
| <i>Gulo gulo</i>           | Sex              | 10.136          | 0.962             | 10.541   | <0.0001  |
| <i>Herpestes edwardsii</i> | Distance         | 3.037           | 2.134             | 1.423    | 0.158    |
| <i>Herpestes edwardsii</i> | Distance Squared | -0.705          | 0.636             | -1.108   | 0.271    |
| <i>Herpestes edwardsii</i> | Intercept        | 67.383          | 3.705             | 18.187   | <0.0001  |
| <i>Herpestes edwardsii</i> | Latitude         | -0.063          | 0.045             | -1.419   | 0.159    |
| <i>Herpestes edwardsii</i> | Longitude        | 0.070           | 0.039             | 1.789    | 0.077    |
| <i>Herpestes edwardsii</i> | Sex              | 4.530           | 0.561             | 8.081    | <0.0001  |
| <i>Lontra canadensis</i>   | Distance         | -3.952          | 1.616             | -2.446   | 0.016    |
| <i>Lontra canadensis</i>   | Distance Squared | 0.843           | 0.627             | 1.343    | 0.181    |
| <i>Lontra canadensis</i>   | Intercept        | 110.179         | 2.753             | 40.020   | <0.0001  |

|                            |                  |         |       |        |         |
|----------------------------|------------------|---------|-------|--------|---------|
| <i>Lontra canadensis</i>   | Latitude         | -0.032  | 0.064 | -0.502 | 0.616   |
| <i>Lontra canadensis</i>   | Longitude        | -0.037  | 0.016 | -2.376 | 0.019   |
| <i>Lontra canadensis</i>   | Sex              | 2.969   | 0.724 | 4.101  | 0.0001  |
| <i>Lutra lutra</i>         | Distance         | -2.473  | 2.774 | -0.892 | 0.375   |
| <i>Lutra lutra</i>         | Distance Squared | 0.453   | 0.903 | 0.501  | 0.618   |
| <i>Lutra lutra</i>         | Intercept        | 111.655 | 3.843 | 29.051 | <0.0001 |
| <i>Lutra lutra</i>         | Latitude         | 0.021   | 0.064 | 0.334  | 0.739   |
| <i>Lutra lutra</i>         | Longitude        | -0.062  | 0.024 | -2.647 | 0.009   |
| <i>Lutra lutra</i>         | Sex              | 7.549   | 1.007 | 7.493  | <0.0001 |
| <i>Lynx canadensis</i>     | Distance         | -2.315  | 1.699 | -1.363 | 0.175   |
| <i>Lynx canadensis</i>     | Distance Squared | 0.758   | 0.572 | 1.325  | 0.187   |
| <i>Lynx canadensis</i>     | Intercept        | 104.962 | 2.639 | 39.773 | <0.0001 |
| <i>Lynx canadensis</i>     | Latitude         | 0.111   | 0.062 | 1.791  | 0.075   |
| <i>Lynx canadensis</i>     | Longitude        | -0.033  | 0.015 | -2.201 | 0.029   |
| <i>Lynx canadensis</i>     | Sex              | 5.222   | 0.477 | 10.959 | <0.0001 |
| <i>Martes americana</i>    | Distance         | 2.298   | 0.861 | 2.668  | 0.008   |
| <i>Martes americana</i>    | Distance Squared | -1.277  | 0.360 | -3.549 | 0.0004  |
| <i>Martes americana</i>    | Intercept        | 51.847  | 1.913 | 27.099 | <0.0001 |
| <i>Martes americana</i>    | Latitude         | 0.464   | 0.041 | 11.337 | <0.0001 |
| <i>Martes americana</i>    | Longitude        | 0.020   | 0.008 | 2.518  | 0.012   |
| <i>Martes americana</i>    | Sex              | 5.857   | 0.368 | 15.923 | <0.0001 |
| <i>Martes foina</i>        | Distance         | -2.304  | 1.030 | -2.237 | 0.026   |
| <i>Martes foina</i>        | Distance Squared | 0.718   | 0.338 | 2.126  | 0.034   |
| <i>Martes foina</i>        | Intercept        | 71.510  | 1.780 | 40.176 | <0.0001 |
| <i>Martes foina</i>        | Latitude         | 0.152   | 0.032 | 4.724  | <0.0001 |
| <i>Martes foina</i>        | Longitude        | 0.004   | 0.013 | 0.320  | 0.749   |
| <i>Martes foina</i>        | Sex              | 3.933   | 0.276 | 14.272 | <0.0001 |
| <i>Martes martes</i>       | Distance         | -1.598  | 2.224 | -0.719 | 0.474   |
| <i>Martes martes</i>       | Distance Squared | 0.595   | 0.705 | 0.844  | 0.400   |
| <i>Martes martes</i>       | Intercept        | 72.241  | 4.499 | 16.058 | <0.0001 |
| <i>Martes martes</i>       | Latitude         | 0.171   | 0.075 | 2.295  | 0.023   |
| <i>Martes martes</i>       | Longitude        | -0.074  | 0.040 | -1.854 | 0.066   |
| <i>Martes martes</i>       | Sex              | 5.289   | 0.539 | 9.804  | <0.0001 |
| <i>Meles meles</i>         | Distance         | 1.227   | 1.556 | 0.789  | 0.431   |
| <i>Meles meles</i>         | Distance Squared | -0.178  | 0.538 | -0.330 | 0.742   |
| <i>Meles meles</i>         | Intercept        | 107.240 | 2.411 | 44.472 | <0.0001 |
| <i>Meles meles</i>         | Latitude         | 0.408   | 0.039 | 10.543 | <0.0001 |
| <i>Meles meles</i>         | Longitude        | -0.082  | 0.015 | -5.389 | <0.0001 |
| <i>Meles meles</i>         | Sex              | 3.116   | 0.534 | 5.830  | <0.0001 |
| <i>Mustela erminea</i> (N) | Distance         | 0.334   | 0.347 | 0.962  | 0.336   |
| <i>Mustela erminea</i> (N) | Distance Squared | -0.050  | 0.125 | -0.400 | 0.689   |
| <i>Mustela erminea</i> (N) | Intercept        | 23.716  | 0.633 | 37.453 | <0.0001 |
| <i>Mustela erminea</i> (N) | Latitude         | 0.312   | 0.014 | 22.002 | <0.0001 |
| <i>Mustela erminea</i> (N) | Longitude        | 0.033   | 0.003 | 9.684  | <0.0001 |
| <i>Mustela erminea</i> (N) | Sex              | 5.287   | 0.151 | 34.977 | <0.0001 |
| <i>Mustela erminea</i> (P) | Distance         | 0.464   | 0.636 | 0.729  | 0.466   |
| <i>Mustela erminea</i> (P) | Distance Squared | -0.079  | 0.233 | -0.339 | 0.735   |
| <i>Mustela erminea</i> (P) | Intercept        | 44.197  | 1.050 | 42.091 | <0.0001 |
| <i>Mustela erminea</i> (P) | Latitude         | -0.033  | 0.018 | -1.811 | 0.071   |
| <i>Mustela erminea</i> (P) | Longitude        | -0.007  | 0.003 | -2.017 | 0.044   |



|                                   |                  |         |        |         |         |
|-----------------------------------|------------------|---------|--------|---------|---------|
| <i>Mustela erminea</i> (P)        | Sex              | 3.816   | 0.239  | 15.952  | <0.0001 |
| <i>Mustela frenata</i>            | Distance         | 0.749   | 0.543  | 1.380   | 0.168   |
| <i>Mustela frenata</i>            | Distance Squared | -0.463  | 0.182  | -2.548  | 0.011   |
| <i>Mustela frenata</i>            | Intercept        | 42.252  | 0.835  | 50.614  | <0.0001 |
| <i>Mustela frenata</i>            | Latitude         | -0.025  | 0.012  | -2.140  | 0.033   |
| <i>Mustela frenata</i>            | Longitude        | -0.018  | 0.005  | -3.527  | 0.0004  |
| <i>Mustela frenata</i>            | Sex              | 5.305   | 0.205  | 25.873  | <0.0001 |
| <i>Mustela nivalis</i> (N)        | Distance         | -0.801  | 0.618  | -1.296  | 0.197   |
| <i>Mustela nivalis</i> (N)        | Distance Squared | 0.120   | 0.220  | 0.543   | 0.588   |
| <i>Mustela nivalis</i> (N)        | Intercept        | 30.516  | 1.033  | 29.543  | <0.0001 |
| <i>Mustela nivalis</i> (N)        | Latitude         | -0.051  | 0.031  | -1.643  | 0.103   |
| <i>Mustela nivalis</i> (N)        | Longitude        | -0.024  | 0.011  | -2.209  | 0.029   |
| <i>Mustela nivalis</i> (N)        | Sex              | 2.668   | 0.239  | 11.168  | <0.0001 |
| <i>Mustela nivalis</i> (P)        | Distance         | -0.145  | 0.483  | -0.300  | 0.764   |
| <i>Mustela nivalis</i> (P)        | Distance Squared | -0.494  | 0.171  | -2.881  | 0.004   |
| <i>Mustela nivalis</i> (P)        | Intercept        | 52.297  | 0.624  | 83.768  | <0.0001 |
| <i>Mustela nivalis</i> (P)        | Latitude         | -0.341  | 0.011  | -30.030 | <0.0001 |
| <i>Mustela nivalis</i> (P)        | Longitude        | 0.003   | 0.004  | 0.580   | 0.562   |
| <i>Mustela nivalis</i> (P)        | Sex              | 4.495   | 0.180  | 24.946  | <0.0001 |
| <i>Mustela putorius</i>           | Distance         | 0.510   | 0.962  | 0.530   | 0.597   |
| <i>Mustela putorius</i>           | Distance Squared | 0.329   | 0.350  | 0.940   | 0.347   |
| <i>Mustela putorius</i>           | Intercept        | 53.458  | 2.627  | 20.353  | <0.0001 |
| <i>Mustela putorius</i>           | Latitude         | 0.090   | 0.051  | 1.761   | 0.079   |
| <i>Mustela putorius</i>           | Longitude        | -0.092  | 0.036  | -2.537  | 0.011   |
| <i>Mustela putorius</i>           | Sex              | 7.238   | 0.322  | 22.456  | <0.0001 |
| <i>Mustela vison</i>              | Distance         | 1.264   | 0.865  | 1.461   | 0.145   |
| <i>Mustela vison</i>              | Distance Squared | -0.412  | 0.330  | -1.250  | 0.212   |
| <i>Mustela vison</i>              | Intercept        | 51.012  | 1.614  | 31.616  | <0.0001 |
| <i>Mustela vison</i>              | Latitude         | 0.026   | 0.034  | 0.768   | 0.443   |
| <i>Mustela vison</i>              | Longitude        | -0.071  | 0.007  | -10.470 | <0.0001 |
| <i>Mustela vison</i>              | Sex              | 5.363   | 0.375  | 14.288  | <0.0001 |
| <i>Paradoxurus hermaphroditus</i> | Distance         | 8.592   | 2.885  | 2.978   | 0.004   |
| <i>Paradoxurus hermaphroditus</i> | Distance Squared | -2.424  | 1.227  | -1.975  | 0.051   |
| <i>Paradoxurus hermaphroditus</i> | Intercept        | 100.073 | 9.507  | 10.526  | <0.0001 |
| <i>Paradoxurus hermaphroditus</i> | Latitude         | 0.219   | 0.120  | 1.825   | 0.071   |
| <i>Paradoxurus hermaphroditus</i> | Longitude        | -0.066  | 0.084  | -0.784  | 0.435   |
| <i>Paradoxurus hermaphroditus</i> | Sex              | 4.087   | 1.245  | 3.283   | 0.001   |
| <i>Procyon lotor</i>              | Distance         | 0.797   | 2.014  | 0.396   | 0.693   |
| <i>Procyon lotor</i>              | Distance Squared | 0.050   | 0.910  | 0.055   | 0.956   |
| <i>Procyon lotor</i>              | Intercept        | 98.470  | 2.521  | 39.056  | <0.0001 |
| <i>Procyon lotor</i>              | Latitude         | -0.121  | 0.044  | -2.736  | 0.007   |
| <i>Procyon lotor</i>              | Longitude        | -0.131  | 0.029  | -4.594  | <0.0001 |
| <i>Procyon lotor</i>              | Sex              | 4.117   | 0.843  | 4.885   | <0.0001 |
| <i>Spilogale gracilis</i>         | Distance         | 1.112   | 1.895  | 0.587   | 0.559   |
| <i>Spilogale gracilis</i>         | Distance Squared | -1.524  | 0.934  | -1.631  | 0.106   |
| <i>Spilogale gracilis</i>         | Intercept        | 61.933  | 17.583 | 3.522   | 0.001   |
| <i>Spilogale gracilis</i>         | Latitude         | -0.100  | 0.113  | -0.879  | 0.382   |
| <i>Spilogale gracilis</i>         | Longitude        | 0.046   | 0.178  | 0.255   | 0.799   |
| <i>Spilogale gracilis</i>         | Sex              | 4.803   | 0.720  | 6.667   | <0.0001 |
| <i>Urocyon cinereoargenteus</i>   | Distance         | 1.015   | 1.800  | 0.564   | 0.574   |
| <i>Urocyon cinereoargenteus</i>   | Distance Squared | -0.409  | 0.652  | -0.628  | 0.531   |

|                                 |                  |         |        |        |         |
|---------------------------------|------------------|---------|--------|--------|---------|
| <i>Urocyon cinereoargenteus</i> | Intercept        | 106.204 | 2.682  | 39.596 | <0.0001 |
| <i>Urocyon cinereoargenteus</i> | Latitude         | 0.445   | 0.045  | 9.812  | <0.0001 |
| <i>Urocyon cinereoargenteus</i> | Longitude        | 0.056   | 0.018  | 3.194  | 0.002   |
| <i>Urocyon cinereoargenteus</i> | Sex              | 3.034   | 0.595  | 5.099  | <0.0001 |
| <i>Ursus arctos</i>             | Distance         | -5.017  | 6.737  | -0.745 | 0.458   |
| <i>Ursus arctos</i>             | Distance Squared | -1.620  | 2.765  | -0.586 | 0.559   |
| <i>Ursus arctos</i>             | Intercept        | 268.989 | 26.274 | 10.238 | <0.0001 |
| <i>Ursus arctos</i>             | Latitude         | -1.142  | 0.341  | -3.350 | 0.001   |
| <i>Ursus arctos</i>             | Longitude        | -0.931  | 0.125  | -7.463 | <0.0001 |
| <i>Ursus arctos</i>             | Sex              | 42.600  | 2.892  | 14.731 | <0.0001 |
| <i>Viverricula indica</i>       | Distance         | 1.280   | 1.754  | 0.730  | 0.467   |
| <i>Viverricula indica</i>       | Distance Squared | -0.877  | 0.590  | -1.485 | 0.141   |
| <i>Viverricula indica</i>       | Intercept        | 83.215  | 3.088  | 26.949 | <0.0001 |
| <i>Viverricula indica</i>       | Latitude         | 0.167   | 0.049  | 3.388  | 0.001   |
| <i>Viverricula indica</i>       | Longitude        | 0.098   | 0.027  | 3.681  | 0.0004  |
| <i>Viverricula indica</i>       | Sex              | 2.113   | 0.715  | 2.953  | 0.004   |
| <i>Vulpes vulpes (N)</i>        | Distance         | -0.028  | 1.872  | -0.015 | 0.988   |
| <i>Vulpes vulpes (N)</i>        | Distance Squared | -0.114  | 0.678  | -0.168 | 0.867   |
| <i>Vulpes vulpes (N)</i>        | Intercept        | 114.834 | 2.274  | 50.491 | <0.0001 |
| <i>Vulpes vulpes (N)</i>        | Latitude         | 0.285   | 0.049  | 5.776  | <0.0001 |
| <i>Vulpes vulpes (N)</i>        | Longitude        | -0.042  | 0.017  | -2.459 | 0.015   |
| <i>Vulpes vulpes (N)</i>        | Sex              | 6.907   | 0.721  | 9.576  | <0.0001 |
| <i>Vulpes vulpes (P)</i>        | Distance         | -0.763  | 2.281  | -0.335 | 0.738   |
| <i>Vulpes vulpes (P)</i>        | Distance Squared | 0.515   | 0.749  | 0.687  | 0.492   |
| <i>Vulpes vulpes (P)</i>        | Intercept        | 107.288 | 2.482  | 43.221 | <0.0001 |
| <i>Vulpes vulpes (P)</i>        | Latitude         | 0.579   | 0.043  | 13.563 | <0.0001 |
| <i>Vulpes vulpes (P)</i>        | Longitude        | -0.022  | 0.016  | -1.388 | 0.166   |
| <i>Vulpes vulpes (P)</i>        | Sex              | 6.654   | 0.738  | 9.021  | <0.0001 |

## Appendix 4C

### comparison of models with and without quadratic terms

AIC scores are for the full models with sex, latitude, longitude, (log) distance and, for AIC (Quadratic model) only, squared (log) distance.

F and p values are output of an ANOVA comparing the quadratic and linear models.

| Species                               | AIC<br>(Linear<br>model) | AIC<br>(Quadratic<br>model) | $\Delta$ AIC | F      | p-<br>value |
|---------------------------------------|--------------------------|-----------------------------|--------------|--------|-------------|
| <i>Alopex lagopus</i>                 | 1590.549                 | 1579.966                    | 10.584       | 12.594 | 0.0004      |
| <i>Canis aureus</i>                   | 3744.190                 | 3737.869                    | 6.321        | 8.302  | 0.004       |
| <i>Canis latrans</i>                  | 3366.006                 | 3361.490                    | 4.516        | 6.490  | 0.011       |
| <i>Canis lupus</i>                    | 1180.250                 | 1177.665                    | 2.585        | 4.520  | 0.034       |
| <i>Gulo gulo</i>                      | 718.866                  | 716.816                     | 2.050        | 3.899  | 0.051       |
| <i>Herpestes edwardsii</i>            | 1206.553                 | 1205.695                    | 0.858        | 2.783  | 0.097       |
| <i>Lontra canadensis</i>              | 843.393                  | 842.630                     | 0.763        | 2.679  | 0.104       |
| <i>Lutra lutra</i>                    | 542.344                  | 541.557                     | 0.787        | 2.659  | 0.106       |
| <i>Lynx canadensis</i>                | 590.802                  | 590.491                     | 0.311        | 2.207  | 0.141       |
| <i>Martes americana</i>               | 895.864                  | 895.997                     | -0.133       | 1.805  | 0.181       |
| <i>Martes foina</i>                   | 1038.512                 | 1038.710                    | -0.198       | 1.755  | 0.187       |
| <i>Martes martes</i>                  | 793.424                  | 793.768                     | -0.343       | 1.589  | 0.210       |
| <i>Meles meles</i>                    | 2184.635                 | 2185.052                    | -0.417       | 1.562  | 0.212       |
| <i>Mustela erminea</i> (N)            | 504.450                  | 505.155                     | -0.705       | 1.227  | 0.271       |
| <i>Mustela erminea</i> (P)            | 1244.716                 | 1245.570                    | -0.854       | 1.110  | 0.294       |
| <i>Mustela frenata</i>                | 2470.720                 | 2471.825                    | -1.105       | 0.884  | 0.347       |
| <i>Mustela nivalis</i> (N)            | 747.040                  | 748.299                     | -1.259       | 0.712  | 0.400       |
| <i>Mustela nivalis</i> (P)            | 1966.720                 | 1968.238                    | -1.518       | 0.473  | 0.492       |
| <i>Mustela putorius</i>               | 968.103                  | 969.696                     | -1.593       | 0.394  | 0.531       |
| <i>Mustela vison</i>                  | 1299.641                 | 1301.284                    | -1.643       | 0.343  | 0.559       |
| <i>Paradoxurus<br/>hermaphroditus</i> | 536.137                  | 537.830                     | -1.693       | 0.295  | 0.588       |
| <i>Procyon lotor</i>                  | 739.345                  | 741.067                     | -1.722       | 0.263  | 0.609       |
| <i>Spilogale gracilis</i>             | 640.880                  | 642.615                     | -1.734       | 0.251  | 0.618       |
| <i>Urocyon cinereoargenteus</i>       | 5636.335                 | 5638.174                    | -1.839       | 0.160  | 0.689       |
| <i>Ursus arctos</i>                   | 2009.156                 | 2011.040                    | -1.884       | 0.115  | 0.735       |
| <i>Viverricula indica</i>             | 1951.454                 | 1953.344                    | -1.889       | 0.109  | 0.742       |
| <i>Vulpes vulpes</i> (N)              | 1469.998                 | 1471.969                    | -1.971       | 0.028  | 0.867       |
| <i>Vulpes vulpes</i> (P)              | 785.874                  | 787.871                     | -1.997       | 0.003  | 0.956       |



## Appendix 4D

### CBL as a function of sex, latitude, longitude and distance to range edge categories. Distance to range edge treated as a categorical 3-level predictor (edge, sub-edge and core)

For each species categories of edge, sub-edge and interior were based either on:

1. Equal distances. Based on the distance of the specimen furthest from the edge: specimens 0-1/3 of this distance are classified as edge specimens, those 1/3 to 2/3 of this distance are sub-edge, and the rest are interior.
2. Equal numbers of specimens. The third of the specimens closest to the edge are classified as edge, the third most distant are classified as interior specimens, and the rest are classified as sub-edge. In case of ties specimens were classified as edge or interior specimens in preference to sub-edge.

For sample sizes see Table 1

Edge specimens are compared to either 1, interior ones, or 2, sub-edge ones.

#### 1. Equal distances

| Species               | factor                      | Estimate | Std. Error | t      | p       |
|-----------------------|-----------------------------|----------|------------|--------|---------|
| <i>Alopex lagopus</i> | edge vs. interior specimens | -1.070   | 1.782      | -0.601 | 0.549   |
| <i>Alopex lagopus</i> | edge vs. sub-edge specimens | 0.870    | 0.798      | 1.090  | 0.277   |
| <i>Alopex lagopus</i> | Intercept                   | 118.396  | 9.464      | 12.510 | <0.0001 |
| <i>Alopex lagopus</i> | Latitude                    | 0.023    | 0.192      | 0.119  | 0.906   |
| <i>Alopex lagopus</i> | Longitude                   | 0.011    | 0.029      | 0.386  | 0.700   |
| <i>Alopex lagopus</i> | sex                         | 4.462    | 0.608      | 7.338  | <0.0001 |
| <i>Canis aureus</i>   | edge vs. interior specimens | -2.078   | 1.919      | -1.083 | 0.281   |
| <i>Canis aureus</i>   | edge vs. sub-edge specimens | -2.111   | 2.056      | -1.027 | 0.307   |
| <i>Canis aureus</i>   | Intercept                   | 151.372  | 3.047      | 49.678 | <0.0001 |
| <i>Canis aureus</i>   | Latitude                    | 0.224    | 0.082      | 2.739  | 0.007   |
| <i>Canis aureus</i>   | Longitude                   | -0.145   | 0.031      | -4.737 | <0.0001 |
| <i>Canis aureus</i>   | sex                         | 4.973    | 1.416      | 3.512  | 0.001   |
| <i>Canis latrans</i>  | edge vs. interior specimens | 0.481    | 1.575      | 0.305  | 0.760   |
| <i>Canis latrans</i>  | edge vs. sub-edge specimens | -1.023   | 1.486      | -0.688 | 0.492   |
| <i>Canis latrans</i>  | Intercept                   | 168.505  | 2.836      | 59.423 | <0.0001 |

|                            |                             |         |       |        |         |
|----------------------------|-----------------------------|---------|-------|--------|---------|
| <i>Canis latrans</i>       | Latitude                    | 0.431   | 0.049 | 8.889  | <0.0001 |
| <i>Canis latrans</i>       | Longitude                   | 0.098   | 0.026 | 3.788  | 0.0002  |
| <i>Canis latrans</i>       | sex                         | 6.451   | 1.121 | 5.752  | <0.0001 |
| <i>Canis lupus</i>         | edge vs. interior specimens | 7.844   | 2.271 | 3.454  | 0.001   |
|                            | edge vs. sub-edge           |         |       |        |         |
| <i>Canis lupus</i>         | specimens                   | 3.947   | 3.218 | 1.227  | 0.222   |
| <i>Canis lupus</i>         | Intercept                   | 200.463 | 6.872 | 29.171 | <0.0001 |
| <i>Canis lupus</i>         | Latitude                    | 0.245   | 0.153 | 1.603  | 0.111   |
| <i>Canis lupus</i>         | Longitude                   | -0.139  | 0.055 | -2.533 | 0.012   |
| <i>Canis lupus</i>         | sex                         | 7.873   | 1.351 | 5.827  | <0.0001 |
| <i>Gulo gulo</i>           | edge vs. interior specimens | 0.166   | 1.170 | 0.141  | 0.888   |
|                            | edge vs. sub-edge           |         |       |        |         |
| <i>Gulo gulo</i>           | specimens                   | 0.468   | 1.616 | 0.290  | 0.772   |
| <i>Gulo gulo</i>           | Intercept                   | 118.904 | 4.945 | 24.047 | <0.0001 |
| <i>Gulo gulo</i>           | Latitude                    | 0.153   | 0.088 | 1.751  | 0.082   |
| <i>Gulo gulo</i>           | Longitude                   | -0.047  | 0.029 | -1.603 | 0.111   |
| <i>Gulo gulo</i>           | sex                         | 10.243  | 0.965 | 10.618 | <0.0001 |
| <i>Herpestes edwardsii</i> | edge vs. interior specimens | 2.341   | 1.613 | 1.451  | 0.150   |
|                            | edge vs. sub-edge           |         |       |        |         |
| <i>Herpestes edwardsii</i> | specimens                   | 2.660   | 1.654 | 1.609  | 0.111   |
| <i>Herpestes edwardsii</i> | Intercept                   | 67.577  | 3.395 | 19.907 | <0.0001 |
| <i>Herpestes edwardsii</i> | Latitude                    | -0.080  | 0.046 | -1.749 | 0.084   |
| <i>Herpestes edwardsii</i> | Longitude                   | 0.081   | 0.038 | 2.148  | 0.034   |
| <i>Herpestes edwardsii</i> | sex                         | 4.578   | 0.561 | 8.154  | <0.0001 |
| <i>Lontra canadensis</i>   | edge vs. interior specimens | -3.947  | 0.893 | -4.421 | <0.0001 |
|                            | edge vs. sub-edge           |         |       |        |         |
| <i>Lontra canadensis</i>   | specimens                   | -0.797  | 0.955 | -0.835 | 0.405   |
| <i>Lontra canadensis</i>   | Intercept                   | 106.839 | 2.630 | 40.624 | <0.0001 |
| <i>Lontra canadensis</i>   | Latitude                    | -0.003  | 0.063 | -0.055 | 0.956   |
| <i>Lontra canadensis</i>   | Longitude                   | -0.042  | 0.016 | -2.691 | 0.008   |
| <i>Lontra canadensis</i>   | sex                         | 3.024   | 0.718 | 4.212  | <0.0001 |
| <i>Lutra lutra</i>         | edge vs. interior specimens | -1.610  | 1.433 | -1.123 | 0.264   |
|                            | edge vs. sub-edge           |         |       |        |         |
| <i>Lutra lutra</i>         | specimens                   | 0.337   | 1.426 | 0.237  | 0.814   |
| <i>Lutra lutra</i>         | Intercept                   | 108.323 | 3.408 | 31.784 | <0.0001 |
| <i>Lutra lutra</i>         | Latitude                    | 0.045   | 0.064 | 0.698  | 0.487   |
| <i>Lutra lutra</i>         | Longitude                   | -0.059  | 0.024 | -2.489 | 0.014   |
| <i>Lutra lutra</i>         | sex                         | 7.735   | 0.995 | 7.773  | <0.0001 |
| <i>Lynx canadensis</i>     | edge vs. interior specimens | -0.906  | 0.995 | -0.911 | 0.363   |
|                            | edge vs. sub-edge           |         |       |        |         |
| <i>Lynx canadensis</i>     | specimens                   | -2.346  | 1.578 | -1.486 | 0.139   |
| <i>Lynx canadensis</i>     | Intercept                   | 104.189 | 2.409 | 43.259 | <0.0001 |
| <i>Lynx canadensis</i>     | Latitude                    | 0.119   | 0.061 | 1.938  | 0.054   |
| <i>Lynx canadensis</i>     | Longitude                   | -0.033  | 0.015 | -2.208 | 0.028   |
| <i>Lynx canadensis</i>     | sex                         | 5.190   | 0.476 | 10.909 | <0.0001 |
| <i>Martes americana</i>    | edge vs. interior specimens | -2.062  | 0.420 | -4.911 | <0.0001 |
|                            | edge vs. sub-edge           |         |       |        |         |
| <i>Martes americana</i>    | specimens                   | 0.767   | 0.523 | 1.466  | 0.144   |

|                            |                             |         |       |        |         |
|----------------------------|-----------------------------|---------|-------|--------|---------|
| <i>Martes americana</i>    | Intercept                   | 52.637  | 1.780 | 29.567 | <0.0001 |
| <i>Martes americana</i>    | Latitude                    | 0.476   | 0.040 | 11.885 | <0.0001 |
| <i>Martes americana</i>    | Longitude                   | 0.030   | 0.008 | 3.673  | 0.0003  |
| <i>Martes americana</i>    | sex                         | 6.010   | 0.360 | 16.674 | <0.0001 |
| <i>Martes foina</i>        | edge vs. interior specimens | -0.778  | 0.580 | -1.342 | 0.181   |
| <i>Martes foina</i>        | edge vs. sub-edge specimens | -1.308  | 0.615 | -2.127 | 0.034   |
| <i>Martes foina</i>        | Intercept                   | 70.926  | 1.628 | 43.565 | <0.0001 |
| <i>Martes foina</i>        | Latitude                    | 0.149   | 0.033 | 4.586  | <0.0001 |
| <i>Martes foina</i>        | Longitude                   | 0.007   | 0.013 | 0.564  | 0.573   |
| <i>Martes foina</i>        | sex                         | 3.958   | 0.277 | 14.307 | <0.0001 |
| <i>Martes martes</i>       | edge vs. interior specimens | -0.338  | 1.114 | -0.303 | 0.762   |
| <i>Martes martes</i>       | edge vs. sub-edge specimens | -0.700  | 1.230 | -0.569 | 0.570   |
| <i>Martes martes</i>       | Intercept                   | 72.199  | 4.240 | 17.027 | <0.0001 |
| <i>Martes martes</i>       | Latitude                    | 0.167   | 0.077 | 2.179  | 0.031   |
| <i>Martes martes</i>       | Longitude                   | -0.061  | 0.038 | -1.624 | 0.107   |
| <i>Martes martes</i>       | sex                         | 5.224   | 0.540 | 9.674  | <0.0001 |
| <i>Meles meles</i>         | edge vs. interior specimens | 1.618   | 0.748 | 2.162  | 0.031   |
| <i>Meles meles</i>         | edge vs. sub-edge specimens | 0.362   | 0.692 | 0.524  | 0.601   |
| <i>Meles meles</i>         | Intercept                   | 108.142 | 2.099 | 51.528 | <0.0001 |
| <i>Meles meles</i>         | Latitude                    | 0.405   | 0.038 | 10.604 | <0.0001 |
| <i>Meles meles</i>         | Longitude                   | -0.084  | 0.015 | -5.707 | <0.0001 |
| <i>Meles meles</i>         | sex                         | 3.024   | 0.533 | 5.673  | <0.0001 |
| <i>Mustela erminea</i> (N) | edge vs. interior specimens | 0.412   | 0.173 | 2.383  | 0.017   |
| <i>Mustela erminea</i> (N) | edge vs. sub-edge specimens | -0.161  | 0.216 | -0.743 | 0.458   |
| <i>Mustela erminea</i> (N) | Intercept                   | 24.162  | 0.519 | 46.539 | <0.0001 |
| <i>Mustela erminea</i> (N) | Latitude                    | 0.304   | 0.013 | 23.622 | <0.0001 |
| <i>Mustela erminea</i> (N) | Longitude                   | 0.031   | 0.003 | 9.313  | <0.0001 |
| <i>Mustela erminea</i> (N) | sex                         | 5.295   | 0.151 | 35.116 | <0.0001 |
| <i>Mustela erminea</i> (P) | edge vs. interior specimens | 0.171   | 0.352 | 0.484  | 0.628   |
| <i>Mustela erminea</i> (P) | edge vs. sub-edge specimens | 0.394   | 0.406 | 0.971  | 0.332   |
| <i>Mustela erminea</i> (P) | Intercept                   | 44.592  | 1.022 | 43.646 | <0.0001 |
| <i>Mustela erminea</i> (P) | Latitude                    | -0.033  | 0.018 | -1.853 | 0.065   |
| <i>Mustela erminea</i> (P) | Longitude                   | -0.008  | 0.004 | -2.187 | 0.029   |
| <i>Mustela erminea</i> (P) | sex                         | 3.806   | 0.239 | 15.912 | <0.0001 |
| <i>Mustela frenata</i>     | edge vs. interior specimens | -0.831  | 0.287 | -2.896 | 0.004   |
| <i>Mustela frenata</i>     | edge vs. sub-edge specimens | -0.757  | 0.314 | -2.414 | 0.016   |
| <i>Mustela frenata</i>     | Intercept                   | 43.841  | 0.797 | 55.041 | <0.0001 |
| <i>Mustela frenata</i>     | Latitude                    | -0.033  | 0.012 | -2.707 | 0.007   |
| <i>Mustela frenata</i>     | Longitude                   | -0.009  | 0.006 | -1.630 | 0.104   |
| <i>Mustela frenata</i>     | sex                         | 5.294   | 0.207 | 25.538 | <0.0001 |
| <i>Mustela nivalis</i> (N) | edge vs. interior specimens | -1.141  | 0.341 | -3.343 | 0.001   |
| <i>Mustela nivalis</i> (N) | edge vs. sub-edge specimens | -0.827  | 0.418 | -1.979 | 0.050   |



|                                   |                             |         |        |        |         |
|-----------------------------------|-----------------------------|---------|--------|--------|---------|
|                                   | specimens                   |         |        |        |         |
| <i>Mustela nivalis</i> (N)        | Intercept                   | 30.330  | 0.928  | 32.681 | <0.0001 |
| <i>Mustela nivalis</i> (N)        | Latitude                    | -0.053  | 0.030  | -1.752 | 0.082   |
| <i>Mustela nivalis</i> (N)        | Longitude                   | -0.026  | 0.011  | -2.368 | 0.019   |
| <i>Mustela nivalis</i> (N)        | sex                         | 2.658   | 0.239  | 11.109 | <0.0001 |
|                                   |                             |         |        | -      |         |
| <i>Mustela nivalis</i> (P)        | edge vs. interior specimens | -2.680  | 0.240  | 11.171 | <0.0001 |
|                                   | edge vs. sub-edge           |         |        |        |         |
| <i>Mustela nivalis</i> (P)        | specimens                   | -0.744  | 0.248  | -2.996 | 0.003   |
| <i>Mustela nivalis</i> (P)        | Intercept                   | 51.606  | 0.597  | 86.431 | <0.0001 |
|                                   |                             |         |        | -      |         |
| <i>Mustela nivalis</i> (P)        | Latitude                    | -0.333  | 0.011  | 29.727 | <0.0001 |
| <i>Mustela nivalis</i> (P)        | Longitude                   | -0.003  | 0.005  | -0.726 | 0.468   |
| <i>Mustela nivalis</i> (P)        | sex                         | 4.445   | 0.179  | 24.842 | <0.0001 |
| <i>Mustela putorius</i>           | edge vs. interior specimens | 2.358   | 0.502  | 4.695  | <0.0001 |
|                                   | edge vs. sub-edge           |         |        |        |         |
| <i>Mustela putorius</i>           | specimens                   | 1.390   | 0.515  | 2.699  | 0.007   |
| <i>Mustela putorius</i>           | Intercept                   | 55.720  | 2.477  | 22.493 | <0.0001 |
| <i>Mustela putorius</i>           | Latitude                    | 0.046   | 0.049  | 0.943  | 0.346   |
| <i>Mustela putorius</i>           | Longitude                   | -0.053  | 0.033  | -1.607 | 0.109   |
| <i>Mustela putorius</i>           | sex                         | 7.183   | 0.325  | 22.113 | <0.0001 |
| <i>Mustela vison</i>              | edge vs. interior specimens | 0.197   | 0.410  | 0.481  | 0.631   |
|                                   | edge vs. sub-edge           |         |        |        |         |
| <i>Mustela vison</i>              | specimens                   | -0.398  | 0.590  | -0.674 | 0.501   |
| <i>Mustela vison</i>              | Intercept                   | 52.279  | 1.529  | 34.181 | <0.0001 |
| <i>Mustela vison</i>              | Latitude                    | 0.005   | 0.034  | 0.141  | 0.888   |
|                                   |                             |         |        | -      |         |
| <i>Mustela vison</i>              | Longitude                   | -0.074  | 0.007  | 10.706 | <0.0001 |
| <i>Mustela vison</i>              | sex                         | 5.443   | 0.374  | 14.567 | <0.0001 |
| <i>Paradoxurus hermaphroditus</i> | edge vs. interior specimens | 6.404   | 2.042  | 3.136  | 0.002   |
|                                   | edge vs. sub-edge           |         |        |        |         |
| <i>Paradoxurus hermaphroditus</i> | specimens                   | 2.593   | 1.752  | 1.480  | 0.142   |
| <i>Paradoxurus hermaphroditus</i> | Intercept                   | 109.181 | 9.194  | 11.875 | <0.0001 |
| <i>Paradoxurus hermaphroditus</i> | Latitude                    | -0.003  | 0.120  | -0.027 | 0.978   |
| <i>Paradoxurus hermaphroditus</i> | Longitude                   | -0.108  | 0.083  | -1.303 | 0.196   |
| <i>Paradoxurus hermaphroditus</i> | sex                         | 4.186   | 1.280  | 3.269  | 0.001   |
| <i>Procyon lotor</i>              | edge vs. interior specimens | 0.745   | 1.140  | 0.653  | 0.515   |
|                                   | edge vs. sub-edge           |         |        |        |         |
| <i>Procyon lotor</i>              | specimens                   | 1.310   | 0.991  | 1.322  | 0.189   |
| <i>Procyon lotor</i>              | Intercept                   | 99.324  | 2.492  | 39.858 | <0.0001 |
| <i>Procyon lotor</i>              | Latitude                    | -0.105  | 0.045  | -2.350 | 0.020   |
| <i>Procyon lotor</i>              | Longitude                   | -0.120  | 0.029  | -4.192 | 0.0001  |
| <i>Procyon lotor</i>              | sex                         | 4.102   | 0.845  | 4.854  | <0.0001 |
| <i>Spilogale gracilis</i>         | edge vs. interior specimens | -2.575  | 0.764  | -3.369 | 0.001   |
|                                   | edge vs. sub-edge           |         |        |        |         |
| <i>Spilogale gracilis</i>         | specimens                   | 1.875   | 0.759  | 2.469  | 0.015   |
| <i>Spilogale gracilis</i>         | Intercept                   | 53.139  | 15.981 | 3.325  | 0.001   |
| <i>Spilogale gracilis</i>         | Latitude                    | -0.141  | 0.102  | -1.384 | 0.170   |
| <i>Spilogale gracilis</i>         | Longitude                   | -0.037  | 0.162  | -0.227 | 0.821   |

|                                 |                             |         |        |        |         |
|---------------------------------|-----------------------------|---------|--------|--------|---------|
| <i>Spilogale gracilis</i>       | sex                         | 4.317   | 0.662  | 6.523  | <0.0001 |
| <i>Urocyon cinereoargenteus</i> | edge vs. interior specimens | -0.233  | 1.063  | -0.219 | 0.827   |
|                                 | edge vs. sub-edge           |         |        |        |         |
| <i>Urocyon cinereoargenteus</i> | specimens                   | 0.815   | 1.032  | 0.790  | 0.431   |
| <i>Urocyon cinereoargenteus</i> | Intercept                   | 105.430 | 2.499  | 42.186 | <0.0001 |
| <i>Urocyon cinereoargenteus</i> | Latitude                    | 0.454   | 0.045  | 9.995  | <0.0001 |
| <i>Urocyon cinereoargenteus</i> | Longitude                   | 0.051   | 0.017  | 2.903  | 0.004   |
| <i>Urocyon cinereoargenteus</i> | sex                         | 3.088   | 0.588  | 5.253  | <0.0001 |
| <i>Ursus arctos</i>             | edge vs. interior specimens | -23.372 | 4.285  | -5.454 | <0.0001 |
|                                 | edge vs. sub-edge           |         |        |        |         |
| <i>Ursus arctos</i>             | specimens                   | -6.714  | 3.633  | -1.848 | 0.067   |
| <i>Ursus arctos</i>             | Intercept                   | 273.849 | 23.869 | 11.473 | <0.0001 |
| <i>Ursus arctos</i>             | Latitude                    | -1.045  | 0.333  | -3.140 | 0.002   |
| <i>Ursus arctos</i>             | Longitude                   | -0.847  | 0.113  | -7.493 | <0.0001 |
| <i>Ursus arctos</i>             | sex                         | 43.410  | 2.852  | 15.223 | <0.0001 |
| <i>Viverricula indica</i>       | edge vs. interior specimens | -1.044  | 1.206  | -0.866 | 0.389   |
|                                 | edge vs. sub-edge           |         |        |        |         |
| <i>Viverricula indica</i>       | specimens                   | 1.721   | 1.200  | 1.434  | 0.155   |
| <i>Viverricula indica</i>       | Intercept                   | 82.590  | 2.765  | 29.868 | <0.0001 |
| <i>Viverricula indica</i>       | Latitude                    | 0.143   | 0.048  | 2.947  | 0.004   |
| <i>Viverricula indica</i>       | Longitude                   | 0.101   | 0.025  | 4.077  | 0.0001  |
| <i>Viverricula indica</i>       | sex                         | 2.171   | 0.695  | 3.124  | 0.002   |
| <i>Vulpes vulpes</i> (N)        | edge vs. interior specimens | -1.004  | 0.953  | -1.054 | 0.293   |
|                                 | edge vs. sub-edge           |         |        |        |         |
| <i>Vulpes vulpes</i> (N)        | specimens                   | -0.857  | 1.079  | -0.794 | 0.428   |
| <i>Vulpes vulpes</i> (N)        | Intercept                   | 115.289 | 1.914  | 60.229 | <0.0001 |
| <i>Vulpes vulpes</i> (N)        | Latitude                    | 0.280   | 0.049  | 5.697  | <0.0001 |
| <i>Vulpes vulpes</i> (N)        | Longitude                   | -0.043  | 0.017  | -2.516 | 0.013   |
| <i>Vulpes vulpes</i> (N)        | sex                         | 6.935   | 0.722  | 9.603  | <0.0001 |
| <i>Vulpes vulpes</i> (P)        | edge vs. interior specimens | 2.132   | 1.219  | 1.749  | 0.081   |
|                                 | edge vs. sub-edge           |         |        |        |         |
| <i>Vulpes vulpes</i> (P)        | specimens                   | 0.942   | 1.195  | 0.788  | 0.431   |
| <i>Vulpes vulpes</i> (P)        | Intercept                   | 106.782 | 2.152  | 49.629 | <0.0001 |
| <i>Vulpes vulpes</i> (P)        | Latitude                    | 0.569   | 0.043  | 13.179 | <0.0001 |
| <i>Vulpes vulpes</i> (P)        | Longitude                   | -0.021  | 0.016  | -1.301 | 0.194   |
| <i>Vulpes vulpes</i> (P)        | sex                         | 6.696   | 0.737  | 9.090  | <0.0001 |

## 2. Equal numbers of specimens

| Species               | factor                      | Estimate | Std. Error | t      | p       |
|-----------------------|-----------------------------|----------|------------|--------|---------|
| <i>Alopex lagopus</i> | edge vs. interior specimens | 0.504    | 0.821      | 0.614  | 0.540   |
|                       | edge vs. sub-edge           |          |            |        |         |
| <i>Alopex lagopus</i> | specimens                   | -1.539   | 1.828      | -0.842 | 0.401   |
| <i>Alopex lagopus</i> | Intercept                   | 120.622  | 9.766      | 12.352 | <0.0001 |
| <i>Alopex lagopus</i> | Latitude                    | -0.012   | 0.196      | -0.064 | 0.949   |
| <i>Alopex lagopus</i> | Longitude                   | 0.009    | 0.029      | 0.302  | 0.763   |
| <i>Alopex lagopus</i> | sex                         | 4.367    | 0.608      | 7.187  | <0.0001 |

|                            |                             |         |       |        |         |
|----------------------------|-----------------------------|---------|-------|--------|---------|
| <i>Canis aureus</i>        | edge vs. interior specimens | -2.909  | 2.020 | -1.440 | 0.153   |
|                            | edge vs. sub-edge specimens |         |       |        |         |
| <i>Canis aureus</i>        | specimens                   | -1.685  | 1.784 | -0.945 | 0.347   |
| <i>Canis aureus</i>        | Intercept                   | 152.472 | 3.182 | 47.924 | <0.0001 |
| <i>Canis aureus</i>        | Latitude                    | 0.179   | 0.079 | 2.265  | 0.026   |
| <i>Canis aureus</i>        | Longitude                   | -0.149  | 0.031 | -4.862 | <0.0001 |
| <i>Canis aureus</i>        | sex                         | 5.079   | 1.416 | 3.586  | 0.001   |
| <i>Canis latrans</i>       | edge vs. interior specimens | 0.182   | 1.442 | 0.126  | 0.900   |
|                            | edge vs. sub-edge specimens |         |       |        |         |
| <i>Canis latrans</i>       | specimens                   | -1.392  | 1.423 | -0.979 | 0.329   |
| <i>Canis latrans</i>       | Intercept                   | 168.431 | 2.788 | 60.417 | <0.0001 |
| <i>Canis latrans</i>       | Latitude                    | 0.442   | 0.051 | 8.734  | <0.0001 |
| <i>Canis latrans</i>       | Longitude                   | 0.100   | 0.026 | 3.862  | 0.0002  |
| <i>Canis latrans</i>       | sex                         | 6.464   | 1.119 | 5.777  | <0.0001 |
| <i>Canis lupus</i>         | edge vs. interior specimens | 5.274   | 1.833 | 2.877  | 0.005   |
|                            | edge vs. sub-edge specimens |         |       |        |         |
| <i>Canis lupus</i>         | specimens                   | 1.668   | 1.752 | 0.952  | 0.342   |
| <i>Canis lupus</i>         | Intercept                   | 207.347 | 6.659 | 31.137 | <0.0001 |
| <i>Canis lupus</i>         | Latitude                    | 0.168   | 0.167 | 1.002  | 0.318   |
| <i>Canis lupus</i>         | Longitude                   | -0.152  | 0.059 | -2.603 | 0.010   |
| <i>Canis lupus</i>         | sex                         | 8.391   | 1.369 | 6.128  | <0.0001 |
| <i>Gulo gulo</i>           | edge vs. interior specimens | -0.268  | 1.134 | -0.236 | 0.814   |
|                            | edge vs. sub-edge specimens |         |       |        |         |
| <i>Gulo gulo</i>           | specimens                   | 0.757   | 1.210 | 0.625  | 0.533   |
| <i>Gulo gulo</i>           | Intercept                   | 118.790 | 4.955 | 23.975 | <0.0001 |
| <i>Gulo gulo</i>           | Latitude                    | 0.156   | 0.087 | 1.792  | 0.076   |
| <i>Gulo gulo</i>           | Longitude                   | -0.047  | 0.029 | -1.623 | 0.107   |
| <i>Gulo gulo</i>           | sex                         | 10.125  | 0.971 | 10.422 | <0.0001 |
| <i>Herpestes edwardsii</i> | edge vs. interior specimens | 0.082   | 0.723 | 0.114  | 0.910   |
|                            | edge vs. sub-edge specimens |         |       |        |         |
| <i>Herpestes edwardsii</i> | specimens                   | -0.185  | 0.697 | -0.266 | 0.791   |
| <i>Herpestes edwardsii</i> | Intercept                   | 70.188  | 3.292 | 21.323 | <0.0001 |
| <i>Herpestes edwardsii</i> | Latitude                    | -0.073  | 0.047 | -1.577 | 0.118   |
| <i>Herpestes edwardsii</i> | Longitude                   | 0.076   | 0.039 | 1.934  | 0.056   |
| <i>Herpestes edwardsii</i> | sex                         | 4.546   | 0.573 | 7.939  | <0.0001 |
| <i>Lontra canadensis</i>   | edge vs. interior specimens | -3.331  | 0.933 | -3.571 | 0.0005  |
|                            | edge vs. sub-edge specimens |         |       |        |         |
| <i>Lontra canadensis</i>   | specimens                   | -2.102  | 0.900 | -2.335 | 0.021   |
| <i>Lontra canadensis</i>   | Intercept                   | 108.274 | 2.622 | 41.301 | <0.0001 |
| <i>Lontra canadensis</i>   | Latitude                    | -0.016  | 0.065 | -0.254 | 0.800   |
| <i>Lontra canadensis</i>   | Longitude                   | -0.033  | 0.016 | -2.140 | 0.034   |
| <i>Lontra canadensis</i>   | sex                         | 3.045   | 0.735 | 4.141  | 0.0001  |
| <i>Lutra lutra</i>         | edge vs. interior specimens | -1.214  | 1.181 | -1.028 | 0.306   |
|                            | edge vs. sub-edge specimens |         |       |        |         |
| <i>Lutra lutra</i>         | specimens                   | 0.583   | 1.266 | 0.461  | 0.646   |
| <i>Lutra lutra</i>         | Intercept                   | 108.072 | 3.417 | 31.626 | <0.0001 |
| <i>Lutra lutra</i>         | Latitude                    | 0.043   | 0.066 | 0.655  | 0.514   |
| <i>Lutra lutra</i>         | Longitude                   | -0.059  | 0.024 | -2.489 | 0.014   |



|                            |                             |         |       |        |         |
|----------------------------|-----------------------------|---------|-------|--------|---------|
| <i>Lutra lutra</i>         | sex                         | 7.796   | 1.010 | 7.722  | <0.0001 |
| <i>Lynx canadensis</i>     | edge vs. interior specimens | 0.398   | 0.584 | 0.681  | 0.496   |
|                            | edge vs. sub-edge           |         |       |        |         |
| <i>Lynx canadensis</i>     | specimens                   | 0.333   | 0.645 | 0.517  | 0.606   |
| <i>Lynx canadensis</i>     | Intercept                   | 102.751 | 2.571 | 39.972 | <0.0001 |
| <i>Lynx canadensis</i>     | Latitude                    | 0.128   | 0.064 | 1.990  | 0.048   |
| <i>Lynx canadensis</i>     | Longitude                   | -0.031  | 0.015 | -2.069 | 0.040   |
| <i>Lynx canadensis</i>     | sex                         | 5.231   | 0.478 | 10.943 | <0.0001 |
| <i>Martes americana</i>    | edge vs. interior specimens | -1.900  | 0.436 | -4.354 | <0.0001 |
|                            | edge vs. sub-edge           |         |       |        |         |
| <i>Martes americana</i>    | specimens                   | -0.114  | 0.480 | -0.238 | 0.812   |
| <i>Martes americana</i>    | Intercept                   | 53.782  | 1.807 | 29.768 | <0.0001 |
| <i>Martes americana</i>    | Latitude                    | 0.433   | 0.040 | 10.833 | <0.0001 |
| <i>Martes americana</i>    | Longitude                   | 0.020   | 0.008 | 2.523  | 0.012   |
| <i>Martes americana</i>    | sex                         | 5.868   | 0.368 | 15.927 | <0.0001 |
| <i>Martes foina</i>        | edge vs. interior specimens | 0.447   | 0.410 | 1.090  | 0.277   |
|                            | edge vs. sub-edge           |         |       |        |         |
| <i>Martes foina</i>        | specimens                   | 0.180   | 0.375 | 0.480  | 0.632   |
| <i>Martes foina</i>        | Intercept                   | 69.926  | 1.532 | 45.642 | <0.0001 |
| <i>Martes foina</i>        | Latitude                    | 0.149   | 0.033 | 4.490  | <0.0001 |
| <i>Martes foina</i>        | Longitude                   | 0.006   | 0.013 | 0.459  | 0.646   |
| <i>Martes foina</i>        | sex                         | 3.908   | 0.277 | 14.083 | <0.0001 |
| <i>Martes martes</i>       | edge vs. interior specimens | 0.451   | 0.647 | 0.698  | 0.486   |
|                            | edge vs. sub-edge           |         |       |        |         |
| <i>Martes martes</i>       | specimens                   | -0.422  | 0.709 | -0.595 | 0.553   |
| <i>Martes martes</i>       | Intercept                   | 71.399  | 3.459 | 20.643 | <0.0001 |
| <i>Martes martes</i>       | Latitude                    | 0.172   | 0.071 | 2.434  | 0.016   |
| <i>Martes martes</i>       | Longitude                   | -0.060  | 0.037 | -1.608 | 0.110   |
| <i>Martes martes</i>       | sex                         | 5.320   | 0.538 | 9.897  | <0.0001 |
| <i>Meles meles</i>         | edge vs. interior specimens | 1.844   | 0.632 | 2.916  | 0.004   |
|                            | edge vs. sub-edge           |         |       |        |         |
| <i>Meles meles</i>         | specimens                   | 0.144   | 0.647 | 0.222  | 0.824   |
| <i>Meles meles</i>         | Intercept                   | 108.294 | 2.062 | 52.507 | <0.0001 |
| <i>Meles meles</i>         | Latitude                    | 0.402   | 0.038 | 10.599 | <0.0001 |
| <i>Meles meles</i>         | Longitude                   | -0.084  | 0.015 | -5.757 | <0.0001 |
| <i>Meles meles</i>         | sex                         | 2.984   | 0.529 | 5.638  | <0.0001 |
| <i>Mustela erminea</i> (N) | edge vs. interior specimens | 0.479   | 0.173 | 2.762  | 0.006   |
|                            | edge vs. sub-edge           |         |       |        |         |
| <i>Mustela erminea</i> (N) | specimens                   | 0.438   | 0.171 | 2.557  | 0.011   |
| <i>Mustela erminea</i> (N) | Intercept                   | 23.985  | 0.516 | 46.487 | <0.0001 |
| <i>Mustela erminea</i> (N) | Latitude                    | 0.307   | 0.013 | 23.906 | <0.0001 |
| <i>Mustela erminea</i> (N) | Longitude                   | 0.032   | 0.003 | 9.872  | <0.0001 |
| <i>Mustela erminea</i> (N) | sex                         | 5.294   | 0.151 | 35.016 | <0.0001 |
| <i>Mustela erminea</i> (P) | edge vs. interior specimens | 0.396   | 0.284 | 1.394  | 0.164   |
|                            | edge vs. sub-edge           |         |       |        |         |
| <i>Mustela erminea</i> (P) | specimens                   | -0.210  | 0.287 | -0.732 | 0.465   |
| <i>Mustela erminea</i> (P) | Intercept                   | 44.039  | 1.037 | 42.474 | <0.0001 |
| <i>Mustela erminea</i> (P) | Latitude                    | -0.020  | 0.019 | -1.067 | 0.286   |

|                                   |                             |         |       |         |         |
|-----------------------------------|-----------------------------|---------|-------|---------|---------|
| <i>Mustela erminea</i> (P)        | Longitude                   | -0.008  | 0.004 | -2.159  | 0.031   |
| <i>Mustela erminea</i> (P)        | sex                         | 3.766   | 0.239 | 15.779  | <0.0001 |
| <i>Mustela frenata</i>            | edge vs. interior specimens | -0.922  | 0.251 | -3.672  | 0.0003  |
|                                   | edge vs. sub-edge           |         |       |         |         |
| <i>Mustela frenata</i>            | specimens                   | -0.573  | 0.235 | -2.442  | 0.015   |
| <i>Mustela frenata</i>            | Intercept                   | 42.990  | 0.672 | 63.932  | <0.0001 |
| <i>Mustela frenata</i>            | Latitude                    | -0.030  | 0.012 | -2.545  | 0.011   |
| <i>Mustela frenata</i>            | Longitude                   | -0.015  | 0.005 | -2.912  | 0.004   |
| <i>Mustela frenata</i>            | sex                         | 5.278   | 0.207 | 25.544  | <0.0001 |
| <i>Mustela nivalis</i> (N)        | edge vs. interior specimens | -1.008  | 0.335 | -3.006  | 0.003   |
|                                   | edge vs. sub-edge           |         |       |         |         |
| <i>Mustela nivalis</i> (N)        | specimens                   | -0.745  | 0.387 | -1.925  | 0.056   |
| <i>Mustela nivalis</i> (N)        | Intercept                   | 29.897  | 0.910 | 32.836  | <0.0001 |
| <i>Mustela nivalis</i> (N)        | Latitude                    | -0.042  | 0.031 | -1.362  | 0.175   |
| <i>Mustela nivalis</i> (N)        | Longitude                   | -0.023  | 0.011 | -2.094  | 0.038   |
| <i>Mustela nivalis</i> (N)        | sex                         | 2.669   | 0.242 | 11.040  | <0.0001 |
| <i>Mustela nivalis</i> (P)        | edge vs. interior specimens | -2.611  | 0.194 | -13.445 | <0.0001 |
|                                   | edge vs. sub-edge           |         |       |         |         |
| <i>Mustela nivalis</i> (P)        | specimens                   | -1.725  | 0.204 | -8.470  | <0.0001 |
| <i>Mustela nivalis</i> (P)        | Intercept                   | 51.884  | 0.593 | 87.498  | <0.0001 |
| <i>Mustela nivalis</i> (P)        | Latitude                    | -0.340  | 0.011 | -30.576 | <0.0001 |
| <i>Mustela nivalis</i> (P)        | Longitude                   | -0.001  | 0.004 | -0.308  | 0.758   |
| <i>Mustela nivalis</i> (P)        | sex                         | 4.429   | 0.179 | 24.726  | <0.0001 |
| <i>Mustela putorius</i>           | edge vs. interior specimens | 2.274   | 0.428 | 5.318   | <0.0001 |
|                                   | edge vs. sub-edge           |         |       |         |         |
| <i>Mustela putorius</i>           | specimens                   | 0.850   | 0.388 | 2.190   | 0.029   |
| <i>Mustela putorius</i>           | Intercept                   | 54.471  | 2.522 | 21.596  | <0.0001 |
| <i>Mustela putorius</i>           | Latitude                    | 0.088   | 0.051 | 1.728   | 0.085   |
| <i>Mustela putorius</i>           | Longitude                   | -0.089  | 0.035 | -2.556  | 0.011   |
| <i>Mustela putorius</i>           | sex                         | 7.278   | 0.323 | 22.557  | <0.0001 |
| <i>Mustela vison</i>              | edge vs. interior specimens | 0.902   | 0.439 | 2.053   | 0.041   |
|                                   | edge vs. sub-edge           |         |       |         |         |
| <i>Mustela vison</i>              | specimens                   | -0.229  | 0.443 | -0.515  | 0.607   |
| <i>Mustela vison</i>              | Intercept                   | 51.766  | 1.504 | 34.429  | <0.0001 |
| <i>Mustela vison</i>              | Latitude                    | 0.015   | 0.033 | 0.459   | 0.647   |
| <i>Mustela vison</i>              | Longitude                   | -0.072  | 0.007 | -10.709 | <0.0001 |
| <i>Mustela vison</i>              | sex                         | 5.507   | 0.371 | 14.825  | <0.0001 |
| <i>Paradoxurus hermaphroditus</i> | edge vs. interior specimens | 4.687   | 2.083 | 2.250   | 0.027   |
|                                   | edge vs. sub-edge           |         |       |         |         |
| <i>Paradoxurus hermaphroditus</i> | specimens                   | 4.003   | 1.623 | 2.467   | 0.015   |
| <i>Paradoxurus hermaphroditus</i> | Intercept                   | 110.148 | 8.997 | 12.243  | <0.0001 |
| <i>Paradoxurus hermaphroditus</i> | Latitude                    | 0.076   | 0.117 | 0.656   | 0.514   |
| <i>Paradoxurus hermaphroditus</i> | Longitude                   | -0.123  | 0.084 | -1.463  | 0.147   |
| <i>Paradoxurus hermaphroditus</i> | sex                         | 4.277   | 1.277 | 3.349   | 0.001   |
| <i>Procyon lotor</i>              | edge vs. interior specimens | 0.946   | 1.052 | 0.900   | 0.370   |
|                                   | edge vs. sub-edge           |         |       |         |         |
| <i>Procyon lotor</i>              | specimens                   | 1.745   | 1.046 | 1.668   | 0.098   |
| <i>Procyon lotor</i>              | Intercept                   | 99.163  | 2.569 | 38.593  | <0.0001 |

|                                 |                             |         |        |        |         |
|---------------------------------|-----------------------------|---------|--------|--------|---------|
| <i>Procyon lotor</i>            | Latitude                    | -0.097  | 0.045  | -2.138 | 0.034   |
| <i>Procyon lotor</i>            | Longitude                   | -0.118  | 0.030  | -3.978 | 0.0001  |
| <i>Procyon lotor</i>            | sex                         | 4.100   | 0.841  | 4.873  | <0.0001 |
| <i>Spilogale gracilis</i>       | edge vs. interior specimens | -2.479  | 0.763  | -3.247 | 0.002   |
| <i>Spilogale gracilis</i>       | edge vs. sub-edge           |         |        |        |         |
| <i>Spilogale gracilis</i>       | specimens                   | 1.904   | 0.769  | 2.477  | 0.015   |
| <i>Spilogale gracilis</i>       | Intercept                   | 52.035  | 16.064 | 3.239  | 0.002   |
| <i>Spilogale gracilis</i>       | Latitude                    | -0.146  | 0.103  | -1.420 | 0.159   |
| <i>Spilogale gracilis</i>       | Longitude                   | -0.047  | 0.162  | -0.289 | 0.773   |
| <i>Spilogale gracilis</i>       | sex                         | 4.369   | 0.665  | 6.568  | <0.0001 |
| <i>Urocyon cinereoargenteus</i> | edge vs. interior specimens | -0.779  | 0.713  | -1.093 | 0.276   |
| <i>Urocyon cinereoargenteus</i> | edge vs. sub-edge           |         |        |        |         |
| <i>Urocyon cinereoargenteus</i> | specimens                   | 0.523   | 0.777  | 0.673  | 0.502   |
| <i>Urocyon cinereoargenteus</i> | Intercept                   | 105.589 | 2.485  | 42.490 | <0.0001 |
| <i>Urocyon cinereoargenteus</i> | Latitude                    | 0.459   | 0.046  | 9.928  | <0.0001 |
| <i>Urocyon cinereoargenteus</i> | Longitude                   | 0.050   | 0.018  | 2.745  | 0.007   |
| <i>Urocyon cinereoargenteus</i> | sex                         | 3.120   | 0.588  | 5.307  | <0.0001 |
| <i>Ursus arctos</i>             | edge vs. interior specimens | -20.920 | 4.369  | -4.788 | <0.0001 |
| <i>Ursus arctos</i>             | edge vs. sub-edge           |         |        |        |         |
| <i>Ursus arctos</i>             | specimens                   | -9.028  | 3.540  | -2.551 | 0.012   |
| <i>Ursus arctos</i>             | Intercept                   | 258.706 | 23.457 | 11.029 | <0.0001 |
| <i>Ursus arctos</i>             | Latitude                    | -0.998  | 0.339  | -2.944 | 0.004   |
| <i>Ursus arctos</i>             | Longitude                   | -0.933  | 0.111  | -8.436 | <0.0001 |
| <i>Ursus arctos</i>             | sex                         | 42.868  | 2.901  | 14.779 | <0.0001 |
| <i>Viverricula indica</i>       | edge vs. interior specimens | -2.448  | 0.956  | -2.561 | 0.012   |
| <i>Viverricula indica</i>       | edge vs. sub-edge           |         |        |        |         |
| <i>Viverricula indica</i>       | specimens                   | -1.848  | 0.996  | -1.856 | 0.066   |
| <i>Viverricula indica</i>       | Intercept                   | 85.320  | 3.357  | 25.415 | <0.0001 |
| <i>Viverricula indica</i>       | Latitude                    | 0.150   | 0.048  | 3.131  | 0.002   |
| <i>Viverricula indica</i>       | Longitude                   | 0.089   | 0.029  | 3.072  | 0.003   |
| <i>Viverricula indica</i>       | sex                         | 2.056   | 0.719  | 2.859  | 0.005   |
| <i>Vulpes vulpes</i> (N)        | edge vs. interior specimens | -0.178  | 0.871  | -0.204 | 0.839   |
| <i>Vulpes vulpes</i> (N)        | edge vs. sub-edge           |         |        |        |         |
| <i>Vulpes vulpes</i> (N)        | specimens                   | -1.502  | 0.876  | -1.715 | 0.088   |
| <i>Vulpes vulpes</i> (N)        | Intercept                   | 115.312 | 1.807  | 63.820 | <0.0001 |
| <i>Vulpes vulpes</i> (N)        | Latitude                    | 0.285   | 0.049  | 5.861  | <0.0001 |
| <i>Vulpes vulpes</i> (N)        | Longitude                   | -0.038  | 0.017  | -2.242 | 0.026   |
| <i>Vulpes vulpes</i> (N)        | sex                         | 6.879   | 0.719  | 9.561  | <0.0001 |
| <i>Vulpes vulpes</i> (P)        | edge vs. interior specimens | 0.227   | 0.940  | 0.241  | 0.810   |
| <i>Vulpes vulpes</i> (P)        | edge vs. sub-edge           |         |        |        |         |
| <i>Vulpes vulpes</i> (P)        | specimens                   | -0.899  | 0.902  | -0.996 | 0.320   |
| <i>Vulpes vulpes</i> (P)        | Intercept                   | 107.587 | 2.035  | 52.873 | <0.0001 |
| <i>Vulpes vulpes</i> (P)        | Latitude                    | 0.590   | 0.043  | 13.874 | <0.0001 |
| <i>Vulpes vulpes</i> (P)        | Longitude                   | -0.023  | 0.016  | -1.434 | 0.153   |
| <i>Vulpes vulpes</i> (P)        | sex                         | 6.626   | 0.737  | 8.989  | <0.0001 |



#### Appendix 4E

CBL as a function of sex, latitude, longitude and distance to range edge. Distance to range edge treated as a continuous predictor. Only specimens closer to an inland rather than to a coastal range edge are used. Minimum sample size per species: n = 20. For sample sizes see Table 3.

| <i>Species</i>             | factor                 | Estimate | Std. Error | t      | p       |
|----------------------------|------------------------|----------|------------|--------|---------|
| <i>Herpestes edwardsii</i> | distance to range edge | 0.603    | 1.067      | 0.565  | 0.575   |
| <i>Herpestes edwardsii</i> | intercept              | 58.860   | 6.116      | 9.623  | <0.0001 |
| <i>Herpestes edwardsii</i> | latitude               | 0.362    | 0.185      | 1.962  | 0.055   |
| <i>Herpestes edwardsii</i> | longitude              | 0.043    | 0.060      | 0.711  | 0.480   |
| <i>Herpestes edwardsii</i> | sex                    | 4.695    | 0.767      | 6.123  | <0.0001 |
| <i>Martes americana</i>    | distance to range edge | -1.669   | 2.390      | -0.698 | 0.488   |
| <i>Martes americana</i>    | intercept              | 60.533   | 5.715      | 10.593 | <0.0001 |
| <i>Martes americana</i>    | latitude               | 0.247    | 0.135      | 1.825  | 0.074   |
| <i>Martes americana</i>    | longitude              | -0.040   | 0.057      | -0.689 | 0.494   |
| <i>Martes americana</i>    | sex                    | 4.764    | 0.929      | 5.126  | <0.0001 |
| <i>Meles meles</i>         | distance to range edge | 6.744    | 2.228      | 3.027  | 0.008   |
| <i>Meles meles</i>         | intercept              | 132.387  | 6.152      | 21.520 | <0.0001 |
| <i>Meles meles</i>         | latitude               | -0.449   | 0.215      | -2.088 | 0.052   |
| <i>Meles meles</i>         | longitude              | -0.161   | 0.043      | -3.713 | 0.002   |
| <i>Meles meles</i>         | sex                    | 3.111    | 1.343      | 2.317  | 0.033   |
| <i>Mustela erminea</i> (N) | distance to range edge | -1.996   | 0.530      | -3.767 | 0.0002  |
| <i>Mustela erminea</i> (N) | intercept              | 22.177   | 3.745      | 5.922  | <0.0001 |
| <i>Mustela erminea</i> (N) | latitude               | 0.643    | 0.059      | 10.969 | <0.0001 |
| <i>Mustela erminea</i> (N) | longitude              | 0.121    | 0.026      | 4.628  | <0.0001 |
| <i>Mustela erminea</i> (N) | sex                    | 4.445    | 0.417      | 10.670 | <0.0001 |
| <i>Mustela erminea</i> (P) | distance to range edge | 5.091    | 2.251      | 2.261  | 0.031   |
| <i>Mustela erminea</i> (P) | intercept              | 34.085   | 9.014      | 3.781  | 0.001   |
| <i>Mustela erminea</i> (P) | latitude               | -0.037   | 0.251      | -0.146 | 0.885   |
| <i>Mustela erminea</i> (P) | longitude              | -0.074   | 0.042      | -1.773 | 0.086   |
| <i>Mustela erminea</i> (P) | sex                    | 4.113    | 0.799      | 5.147  | <0.0001 |
| <i>Mustela frenata</i>     | distance to range edge | -0.869   | 0.403      | -2.157 | 0.033   |
| <i>Mustela frenata</i>     | intercept              | 41.795   | 2.275      | 18.369 | <0.0001 |
| <i>Mustela frenata</i>     | latitude               | 0.054    | 0.025      | 2.147  | 0.034   |
| <i>Mustela frenata</i>     | longitude              | -0.014   | 0.018      | -0.792 | 0.430   |
| <i>Mustela frenata</i>     | sex                    | 4.999    | 0.574      | 8.702  | <0.0001 |

|                            |                   |         |        |        |         |
|----------------------------|-------------------|---------|--------|--------|---------|
|                            | distance to range |         |        |        |         |
| <i>Mustela nivalis</i> (N) | edge              | 0.399   | 1.025  | 0.389  | 0.701   |
| <i>Mustela nivalis</i> (N) | intercept         | 32.713  | 4.154  | 7.874  | <0.0001 |
| <i>Mustela nivalis</i> (N) | latitude          | -0.059  | 0.111  | -0.529 | 0.602   |
| <i>Mustela nivalis</i> (N) | longitude         | 0.012   | 0.057  | 0.218  | 0.829   |
| <i>Mustela nivalis</i> (N) | sex               | 2.647   | 0.591  | 4.477  | 0.0002  |
|                            | distance to range |         |        |        |         |
| <i>Mustela nivalis</i> (P) | edge              | -0.644  | 3.369  | -0.191 | 0.851   |
| <i>Mustela nivalis</i> (P) | intercept         | 60.279  | 6.398  | 9.422  | <0.0001 |
| <i>Mustela nivalis</i> (P) | latitude          | -0.508  | 0.400  | -1.272 | 0.220   |
| <i>Mustela nivalis</i> (P) | longitude         | -0.052  | 0.092  | -0.560 | 0.582   |
| <i>Mustela nivalis</i> (P) | sex               | 5.152   | 1.320  | 3.903  | 0.001   |
|                            | distance to range |         |        |        |         |
| <i>Mustela vison</i>       | edge              | -11.607 | 2.428  | -4.780 | 0.0001  |
| <i>Mustela vison</i>       | intercept         | 29.125  | 10.804 | 2.696  | 0.013   |
| <i>Mustela vison</i>       | latitude          | 0.944   | 0.189  | 4.994  | <0.0001 |
| <i>Mustela vison</i>       | longitude         | -0.117  | 0.055  | -2.129 | 0.044   |
| <i>Mustela vison</i>       | sex               | 6.560   | 1.115  | 5.883  | <0.0001 |
|                            | distance to range |         |        |        |         |
| <i>Viverricula indica</i>  | edge              | 2.435   | 2.488  | 0.979  | 0.337   |
| <i>Viverricula indica</i>  | intercept         | 55.524  | 12.536 | 4.429  | 0.0002  |
| <i>Viverricula indica</i>  | latitude          | 1.063   | 0.340  | 3.124  | 0.004   |
| <i>Viverricula indica</i>  | longitude         | 0.037   | 0.062  | 0.587  | 0.562   |
| <i>Viverricula indica</i>  | sex               | 2.727   | 1.495  | 1.824  | 0.080   |
|                            | distance to range |         |        |        |         |
| <i>Vulpes vulpes</i> (N)   | edge              | -3.145  | 1.982  | -1.587 | 0.117   |
| <i>Vulpes vulpes</i> (N)   | intercept         | 127.226 | 6.280  | 20.258 | <0.0001 |
| <i>Vulpes vulpes</i> (N)   | latitude          | 0.631   | 0.121  | 5.220  | <0.0001 |
| <i>Vulpes vulpes</i> (N)   | longitude         | 0.153   | 0.069  | 2.209  | 0.030   |
| <i>Vulpes vulpes</i> (N)   | sex               | 8.129   | 1.126  | 7.216  | <0.0001 |







## Appendix 5

### Species level data

| <i>species</i>                    | Mean CBL<br>(mm) | standard<br>deviation<br>of CBL<br>(mm) | mean<br>distance<br>(log<br>km) | standard<br>deviation<br>of<br>distance<br>(log km) | slope  | standardized<br>slope | log<br>mass<br>(g) | CBL<br>CV,<br>females | CBL<br>CV,<br>males | log range<br>size<br>(maps) |
|-----------------------------------|------------------|-----------------------------------------|---------------------------------|-----------------------------------------------------|--------|-----------------------|--------------------|-----------------------|---------------------|-----------------------------|
| <i>Alopex lagopus</i>             | 121.20           | 4.31                                    | 0.60                            | 0.44                                                | -0.039 | -0.004                | 3.48               | 2.82                  | 3.24                | 6.70                        |
| <i>Canis aureus</i>               | 150.83           | 9.37                                    | 1.72                            | 0.86                                                | -1.411 | -0.129                | 3.96               | 6.52                  | 5.35                | 7.39                        |
| <i>Canis latrans</i>              | 178.46           | 9.68                                    | 1.61                            | 0.73                                                | -0.154 | -0.012                | 4.03               | 5.36                  | 4.65                | 7.16                        |
| <i>Canis lupus</i>                | 244.79           | 10.31                                   | 2.17                            | 0.68                                                | 4.319  | 0.286                 | 4.54               | 3.73                  | 4.13                | 7.13                        |
| <i>Gulo gulo</i>                  | 141.21           | 7.36                                    | 1.84                            | 0.89                                                | -0.240 | -0.029                | 3.96               | 3.08                  | 4.16                | 7.02                        |
| <i>Herpestes edwardsii</i>        | 76.89            | 3.66                                    | 1.93                            | 0.52                                                | 0.747  | 0.106                 | 3.13               | 3.62                  | 3.66                | 6.49                        |
| <i>Lontra canadensis</i>          | 110.63           | 4.93                                    | 1.43                            | 0.79                                                | -2.038 | -0.329                | 3.92               | 3.98                  | 4.39                | 7.13                        |
| <i>Lutra lutra</i>                | 112.36           | 6.66                                    | 1.70                            | 0.67                                                | -1.166 | -0.117                | 3.92               | 4.61                  | 4.96                | 7.56                        |
| <i>Lynx canadensis</i>            | 116.38           | 4.57                                    | 2.16                            | 0.52                                                | -0.127 | -0.014                | 3.94               | 3.62                  | 2.65                | 7.03                        |
| <i>Martes americana</i>           | 77.08            | 4.77                                    | 1.42                            | 0.87                                                | -0.825 | -0.150                | 3.00               | 5.68                  | 4.65                | 6.92                        |
| <i>Martes foina</i>               | 79.42            | 3.08                                    | 1.94                            | 0.55                                                | -0.177 | -0.031                | 3.1                | 3.16                  | 2.91                | 6.88                        |
| <i>Martes martes</i>              | 82.51            | 4.04                                    | 2.05                            | 0.55                                                | 0.255  | 0.035                 | 3.11               | 4.07                  | 3.66                | 6.86                        |
| <i>Meles meles</i>                | 128.71           | 6.97                                    | 1.55                            | 0.64                                                | 0.783  | 0.072                 | 3.98               | 5.43                  | 5.22                | 7.36                        |
| <i>Mustela erminea</i> (N)        | 40.73            | 3.92                                    | 1.73                            | 0.83                                                | 0.218  | 0.046                 | 2.35               | 7.43                  | 7.49                | 7.06                        |
| <i>Mustela erminea</i> (P)        | 45.16            | 3.03                                    | 1.80                            | 0.63                                                | 0.264  | 0.055                 | 2.35               | 6.55                  | 4.63                | 7.34                        |
| <i>Mustela frenata</i>            | 46.34            | 3.56                                    | 1.79                            | 0.67                                                | -0.653 | -0.123                | 2.38               | 6.56                  | 5.17                | 7.06                        |
| <i>Mustela nivalis</i> (N)        | 31.24            | 1.98                                    | 1.54                            | 0.94                                                | -0.521 | -0.247                | 1.91               | 3.81                  | 5.57                | 6.98                        |
| <i>Mustela nivalis</i> (P)        | 35.98            | 4.18                                    | 1.74                            | 0.64                                                | -1.646 | -0.252                | 1.91               | 9.05                  | 10.33               | 7.44                        |
| <i>Mustela putorius</i>           | 63.80            | 4.98                                    | 1.73                            | 0.61                                                | 1.521  | 0.187                 | 3.01               | 6.01                  | 5.13                | 6.80                        |
| <i>Mustela vison</i>              | 63.69            | 5.06                                    | 1.57                            | 0.87                                                | 0.205  | 0.035                 | 3.00               | 5.40                  | 7.29                | 7.11                        |
| <i>Paradoxurus hermaphroditus</i> | 104.52           | 7.38                                    | 1.47                            | 0.76                                                | 3.527  | 0.363                 | 3.54               | 6.51                  | 6.97                | 6.77                        |
| <i>Procyon lotor</i>              | 110.47           | 5.47                                    | 1.22                            | 0.68                                                | 1.033  | 0.129                 | 3.95               | 4.20                  | 4.97                | 6.99                        |
| <i>Spilogale gracilis</i>         | 55.24            | 4.18                                    | 1.12                            | 0.55                                                | -2.212 | -0.290                | 2.68               | 5.25                  | 6.86                | 6.47                        |
| <i>Urocyon cinereoargenteus</i>   | 116.86           | 5.06                                    | 1.64                            | 0.52                                                | -0.081 | -0.008                | 3.57               | 4.20                  | 4.02                | 6.86                        |

|                           |        |       |      |      |         |        |      |      |      |      |
|---------------------------|--------|-------|------|------|---------|--------|------|------|------|------|
| <i>Ursus arctos</i>       | 345.75 | 33.81 | 1.42 | 0.90 | -10.173 | -0.270 | 5.51 | 7.49 | 8.71 | 7.01 |
| <i>Viverricula indica</i> | 97.31  | 4.37  | 1.62 | 0.69 | -1.372  | -0.217 | 3.34 | 4.67 | 4.17 | 6.86 |
| <i>Vulpes vulpes</i> (N)  | 137.61 | 7.75  | 1.73 | 0.73 | -0.380  | -0.036 | 3.74 | 4.78 | 5.16 | 7.15 |
| <i>Vulpes vulpes</i> (P)  | 135.90 | 9.53  | 1.82 | 0.60 | 0.803   | 0.051  | 3.74 | 6.39 | 6.62 | 7.62 |

mean distance is the mean of the log transformed distances from range edge (km) for all specimens.  
Slope is the slope of the distance from range edge/CBL relationship (from table 1 and Appendix 4A)  
Log masses (in grams) are from Meiri et al. (2005e)  
CV is the coefficient of variation in CBL  
Log range size (km<sup>2</sup>) is from the range maps in Appendix 1.
